# Supplementary material for: The Genome and Development-Dependent Transcriptomes of Pyronema confluens: A Window into Fungal Evolution
Source: PLoS Genet. 2013 Sep 19;9(9):e1003820. doi: 10.1371/journal.pgen.1003820 (PMC3778014; doi:10.1371/journal.pgen.1003820)
Supplement: Table S4 — Repeat elements in the P. confluens genome. (XLSX) [file pgen.1003820.s020.xlsx]

## Sheet: summary
Table S4. Repeats in the Pyronema confluens genome.
Sheet 1: Summary of repeat elements (A) and predicted proteins with putative transposon-related activity (B).
(for complete lists of repeat elements longer than 200 bp, simple repeats and low complexity regions, see sheets 2, 3 and 4).
Repeats were identified with RepeatMasker (A.F.A. Smit, R. Hubley, P. Green; www.repeatmasker.org) based the RepbaseUpdate library (Jurka J, Kapitonov VV, Pavlicek A, Klonowski P, Kohany O, Walichiewicz J. Cytogenet Genome Res 2005, 110: 462-467) and a de novo library of P. confluens transposons that was generated by RepeatModeler (A.F.A. Smit, R. Hubley; www.repeatmasker.org/RepeatModeler.html).…
A. Copies of repeat elements longer than 200 bp, simple repeats and low complexity regions. Predicted classes indicate elements that transpose via an RNA intermediate (class I). No conserved class II elements (elements that transpose at the DNA level by excision and reintegration) or satellite DNA were identified.
class	class/family	no. of transposon consensus sequences	copies in genome	total length (all copies) in bp	% of genome	average length in bp
I	LINE/L2	1	12	7.612	0.02	634
I	LINE/Penelope	1	28	28.025	0.06	1.001
I	LINE/R1	2	30	10.532	0.02	351
I	LINE/Tad1	10	972	1,110,986	2.22	1.143
I	LTR/Copia	2	65	49.366	0.10	759
I	LTR/Gypsy	13	2042	2,383,010	4.76	1.167
I	LTR/Pao	2	84	74.954	0.15	892
	Unknown	106	3837	2,357,264	4.71	614
low complexity regions		1870		105.476	0.21	56.3741
simple repeats		10625		514.177	1.03	48.3886
sum		137	7070	6,021,749	12.04	852
B. Predicted proteins with putative transposon-related activity. Predicted classes indicate elements that transpose via an RNA intermediate (class I), and elements that transpose at the DNA level by excision and reintegration (class II).
locus_tag	class	superfamily	scaffold	peptide length	Best blast hit vs. swissprot or nr
PCON_06774	I	Copia	283	400	Similar to Retrovirus-related Pol polyprotein from transposon TNT 1-94; acc. no. P10978
PCON_02019	I	Copia	118	139	Similar to Copia protein; acc. no. P04146
PCON_07517	I	Copia	331	200	Similar to Retrovirus-related Pol polyprotein from transposon TNT 1-94; acc. no. P10978
PCON_05589	I	Gypsy	218	1033	Similar to Retrotransposable element Tf2 155 kDa protein type 1; acc. no. Q05654
PCON_06776	I	Penelope	283	416	Similar to putative reverse transcriptase [Phanerochaete chrysosporium]; acc. no. AAX11377
PCON_05039	II	Helitron	190	875	Similar to DNA repair and recombination protein pif1, mitochondrial; acc. no. Q9UUA2
PCON_07238	II	Helitron	306	418	Similar to ATP-dependent helicase RRM3; acc. no. P38766
PCON_02665	II	Tc1-Mariner	1262	423	Similar to putative transposase [Phaeosphaeria nodorum]; acc. no. CAD32687
PCON_03615	II	Tc1-Mariner	1483	465	Similar to conserved hypothetical protein [Penicillium marneffei ATCC 18224]; acc. no. XP_002144529
PCON_03234	II	PIF-Harbinger	1399	250	Similar to PREDICTED: uncharacterized protein LOC100778909 [Glycine max]; acc. no. XP_003528986
PCON_04005	II	PIF-Harbinger	1529	478	Similar to Putative nuclease HARBI1; acc. no. Q96MB7
PCON_09089	II	PIF-Harbinger	416	157	Similar to PREDICTED: uncharacterized protein LOC100803756 [Glycine max]; acc. no. XP_003518029
PCON_01006	II	PIF-Harbinger	1003	260	Similar to Putative nuclease HARBI1; acc. no. Q8BR93

## Sheet: repeats_>200bp
Table S4. Repeats in the Pyronema confluens genome.
Sheet 2: Repeat elements longer than 200 bp.
repeat number	Pcon_v1_scaffold	start position in scaffold	end position in scaffold	repeat length	strand	repeat class/family	sequence
1	274	74562	74933	372	C	LINE/L2	CAAGGGCCCCGCTCAGATGACGACTTCGTATTTCATCTCTCATTTCCTCACGGAAGCGGGTGAGAGAGTGAGCCAAGGCTGGCTTGAGGGACCCCGGATACCGCGGTTGGAATGTGCTTTGAGGTATGTAACAAATTCTTTAACTCAATATTAACTCTGTGAATTTCAATTTTCGCTGACACGTACTTCTGGGTATCTTTAGGCAAGATCCTGTGGGGCCTGGGCTGAGAGGGACCCGGAAGGCGAGCTTAAGAAAATGAACGGACGGGGTATGAATTTTTCGGGATTTTCCCGTATCCAAAACCTCGGTGAAGCTGTCACCTGGGTTTTCTGACCGAGTTTGACATTGAGTTAAAGAACTCACTTATCCGT
2	317	12030	14145	2116	C	LINE/L2	TATTTAAGGTACTCATCTTGACGATGCCATCTGCTGGGGCATGAATCATCATTCGGTGTTGGCGTTAAACGAACATTATGAGATGGAACTGTAGAGAAGCTTTGGCTCCTAAAGGTATATTCAAGATTTCCACTGACGTGGAAGCTGCAGCCTGCTGAAACCAAAGCAATATCTGGAATCTATGTTGATAAATGCGACCCCTAGGGGGTCGAACCATGGTCGAGTTCCCGCAAAATGTTAGCTAATGTAAAATCCATCAGCTACAGACATTGATGCGGTTCTTTGACCCCGACTCGAGCCGCGCATTTCCAGGCTCAATAGCCACTGACTTTGCCTCACCAGACTTGGACTAACGCGTCTGTATTCTATTAAAACTCAAGTTCATCACCACAGGGTCAA…
3	322	6729	8996	2268	C	LINE/L2	TATTTAAGGTAAGTATTTTGAAGATTTAATCCGAGACATGGTTCATCATTCGGCATTGGATTCAAGCGATGGTGATGAGATGATGAAACTGCAGAGAAGCTTTGAGAAACCGTAAAATCTGCTGGTAGATATCAGAACGTGCAGCGCTTATGATACAGCCAAAGCGATGTCCGAGGTTGATGTTGGTAGATTTGAACCCCGAGAGGTCAATCCAGGTCGATTTGCCGCAACATTTCTGCTGAATGTAAATCTATCAGCTACAATCTTTGACGGACTTATTGGACCCTGAAGGCGTTTTGAAAACCCAATTGAGTCGCGTCTTTTCAGGCTCAATGGCTACTGGATGCGCCCCACAAGATACAAAAAAAACGCGTCTACTTACATTCTATTAATATTCGG…
4	331	65093	65391	299	+	LINE/L2	AACTCTTGCTTCGCTCTGCTTCAGAATTAAGTATGTGACGAATCAGCTTCTTCTATTATCATGTGAATTCGCCGTTACTAACCCATGATGAACTAGATTGGGAAGCCACTAGGGCACCCAGATTTATTACGACAGCTTCACCAGTCGCGCCTACGTCTACGGAAACACTTTCGAGGACCTAACTAAGGGACGAGAGTTATCCCTAGACGTCGTACAGATCGCAACTTTCAATGTCTGGTCTTTGAGATGTTTGTTGTTTTCACTTCTTCACCATCGAGACTCTGACTAACAATTCGAAG
5	331	67494	67757	264	+	LINE/L2	CTAAAGAGGACGTTTGGTTTTGCTCTGCGCACGGCTTCGAAACTTGTAAGTTTCCTCATCATTTCCAAACAAGCGGGAAGCTTTAACTAACTCTTACCAGTCCTCTCCGTAAACCAGCACTTCGTCCGCTTGAGATACCACCACGATGGAACGACTTTGAACCCCGCGAACGCCCTCGATACCCGCACCACGATTCGAATCGTGCTACCTAGCAACTCGAGATCCCCGCCTCGGTTCGAAATGCCATCAACGAGTGGCTCGTTT
6	396	36942	37225	284	+	LINE/L2	TTCTCCGTCAACCGATTCTGCCCTACCAATTCACACACTTCCACTTAGTAAGTCAGGATAAATGACTGTTTTTTCCACATACTTTACTTAACCCCTGACTGAGAATTCCTTGGGCCAAATCTCTTTCTGCTATAACAAACTCTCCGCTACACACTCAGATTTCCTTTATTCTATCAACGTACTCTCCTCTACACACCCCGACATCTTTTCTTCTATCATCAACATGTCATCCGTTGATACCGTTACCTCCACTAGCGACCCTCGGGCTGCCAATGTCGTTCGTT
7	799	67676	68085	410	C	LINE/L2	ACCACAGTCCTAACTAGCTCCACTGAGGAACGCATTCAGTTTTCTTCGTCCCAGAAAGCTATGGGACTGATACTTATAAGTTAAATACGCATTTCTAAAGCAGCGGGATGCTTTTACTAACTCTTATTAGACCTCTTTCAGTGGGCCGTCACTTCGCCCGCCTCAGGCATTTGCATGACGGTATATACAACTCTTAATCCTGCCAACTCCCTGGATGCCCGAACCACTATCGAGGCAACTCAAGACTTGGAGACCCCGCCAATGTCAGACGTGAAATCAAGGAGTGGCTAGTTTACGAGCCCTCCTCCGGCCGACTTTCCGTAAGTAAGGCTGGCTATAAGCCCCCCTCTGCCAAATTACCATATTGAGCAAATCGACTCGGCAACCACCTTGACCTAC…
8	1373	9894	10231	338	C	LINE/L2	GATTCAGCTAACATACTTATAGGTCTCCTTGGGAAAGATTCTGTGGGCTGAGAGGGACCCGGACGATAAGGTTAATATACTCAATGGACGGGTTATGGATTTCGCTGGCTTTTTCCTGAATCCAGAACCTCGGTGAAGCCGTGAACTGGGTCTTCCGCCGCGAGTTCGACAGAGCGTCAAAAAACGCCCTTGTCCATGGCCTCGTTCAGAGAGGTTACGCTACCTACTCTCCTGAGAAAGGCGTTTGGATAACAACAGTCCTCACTGGTTCAGGAGCCAAGGTATATGTCTGGTTGTGTTCGTCCCACAACGATGGCACTGATACTTGTAAGTTAGAT
9	1375	299811	300049	239	C	LINE/L2	CCCTCGAATGATGGACTCCTGGTTCACCGACAAATTCATCATGAATCAGGGATGAGATTTGTGCAAGGCCTACATGAGACTGGCAACACTGATCGGATGTTGTTCGAGGTATGTAACAAATTATATAACTCAGTATCTAATCTTTGGATTCAACCAACACACTTCTAGGTCTCGTTGGGCAAAACACTGTGGGCTGAGAGGGACCGGGACAATGAATGTAGCAAGCTCAATGGATGGGT
10	1375	300532	300748	217	C	LINE/L2	TCCGCCCTCCTCCAGAAGTAAGTAACTCATCACCCCTCATGAATATGTGAATTCGCCGTTACTAACGCACGATGAACAAGATTGGGACGCCACTCCGGTACCCAGATGACTTACGACACTGTTACCAGCTGTGCCTACGTATGCGGTAACACATTCGAGGATATTGTCAAGGGGCTCGAGTTGCTTTTGGACGTGATCCAAATTGCAAGCTACAATG
11	1543	56049	56575	527	+	LINE/L2	TACAGCCAAACGGATATCCGGAGTCGATGTAGGTGAATTCATCATTTAGCGCCCAGGAGGTCGACGTAGGGTCTATTTGCCACAATATTTCTGCCGAACGTAAAGTCCATCAGCCACAAACATTGACGCGCTTACGTGTTGGACCCAGAAGATGTTTTTCAGGCCCATTTCGCCTCGTTTTCTCAGGCCAGGCCCAATAGCCACTAAGCTGCGCCTCACGAGACTCGAACAAAAAAGCGTCTTGTATTCTATTGATACTCAAGTGCGTGTCAAAGTTCGTCGAGTTCACTTGACAGGCCTTGGCGCTTGAATAAAACCGTCTCCATTCCCCGTGCCTTTTACTACCTTCACCAGAAAGAAACGTACGTTACCTTTACCGCAACTATTTTACTTCCATCA…
12	1570	6291	6568	278	+	LINE/L2	ACCAGTCCTCTCCGTAGACCAGCACATCGCCTTATTAAGACACCACCTCGATGGAACAACTCTCAACCCTGCGGACACCCTGGATGTCCGCACTATGATCCGTGCCACTAAGCAGCTAGAGACCTCCGCCCACGTTCGGAACACCATCAAGGAGTGGCTCGTGTATGACATCCTCTCTAGCTGCCTCGCCTTTGGAAAGTCCGAGTAAGAATAGCTCCTCTCTTCCTAACCACCAGGTTGAGCCGATACAGGTAACCGTATTGACCCATAGAATTATT
13	23	13928	14563	636	C	LINE/Penelope	AAATTAGTTAAGCATAATCTAATGCATTGCCGATCACACTTGGTGATCTCGGAAGGACCGGGAATAATTCTTCTGTTGCCAAGACCGCAATTCGGATGTGAATCTATCCATTCCCCCCTATCGCTTTTCTATAAGTAAAGCGATCTACCACAGTACTGAAGAGATTCCGTATTGAAACTGGTCTGCACAATTTACATTGGCACCTGTATACTGCTGCAAAATCTGTTTCACAACAAATCTTCATTCGAAACACACACTTGCCGCGCTTCACTCGGCTCGTCCCTAACCCTAACTTCGCTTTTGAACACCATGCCGTGCTCTGTCCTTTCCATTCCGATGTACCCACTCGGTCTTGATGCAAACCATTGCGAGAGTGCTCTCGCGCTCGCCTCTACACTC…
14	92	1294	2499	1206	C	LINE/Penelope	TGTTTTCTAATTCCAGTATATTCATAATACCTGGTTATAACTAGTGTGAAATAAGACATTATGTAGTGGTTCCTACAATGCTAGTTCGCTAGCATTAATGTCTTGCATCATGTGATATCACTATTGTGTTGCCTAGGCAACGATGTCACACTGACATTAGTCAGGATTATGTAACATACTTTTCGAAACATCACGTGACGGTATCACATGATCTTGTCACATGATCATATCACATGATCATATCACATGACCTTATCTTATCTTTATCAGATTAGATCAGATAAGTGGAAGGACAGGGAATAATTTTTCCGTTGCCAAGACGGAATTCGGATGTGAATCTATCCGTTCCTCCTATCGCTCCTACTCTATAAGTAGGACGATCCGCTGCAGTACTGAAGA…
15	296	10215	10675	461	C	LINE/Penelope	TTATAATTGACTATAAACTAGCAAAGTATGGAACATTATATAGTAGTTTCTACCATGCCAGTTGGCTAATATGAATGTTCTTGCATCATGCGATATCACTATTGTGTTGCCTAGGCAACGCTGCCAAGCTAAAAATTAGTTAAGCATAAACTAATACATTGCCAATCTCACTCGGTGATCTTATCTTATCTTAATCAGATTAGATAAGATAAGATGTCCGAAGGACCAGGAATAATCTTTCCATTGCCAAGACGGAAACTCGGATGTGAATCTATCCATTCCCCCCTATCACTTTTCTATAAGTAAAGCGATCTGCCATGGTACTGAAGAGATTGCGTATCGAAACTGGTCTGCACAACTTACATTGGCACCTGTATACCGCTGTGAAATCTCTTTCTC…
16	388	4587	5025	439	C	LINE/Penelope	AAGTATGGAACATTATGTAGTAGTCTCTACCATGTTAGTTCGCTAATATGAATGTTCTTGCATCATGCAATATCACTATCGTGTTGCCTAGGCAATGATGCCAAGCTCAAAATTAGTTAAGCATAAACTAATACATTGCCGATCTCACTCGGTGATCTTATCTTATCTTCATCAGATTAGATAAGATAAGATATCGGAAGGACCAGGAATAATCTTTCCGATGCCAAGACAGAAACTCGGATGTGAATCTATCCGTTCCCCCCCTATCGCTTTTCTATACGTAAAGCGATCCGCCGCGGTACTGAAGAGATTCCATATCGAAACTGGTCTGCACAACTTACGTTTTCACCTGTATACCGCTGCGAAATCTCTTTCTCAACAAACCTTTGTTCGAAACAA…
17	536	1	2009	2009	+	LINE/Penelope	ATTTGACTATAAACTAGCAAGTATAGAATATTATGTAGTATTTTCTACGATGTTAGTTCGCTAACATGAATGTTCCTGCATCATGCAATATCACTATCATGTTGCCTAGGCAATGAGGCCAATCTAAGATATTAGTTAAGCATAAACTAATGCATTGCCGATCGCACTTGGTGATCTTATCTTATCTTAATCATACTAGATAACATAAGATATCAGAAGGACCGGAGATAATCTTTCCGTTGCCAAGACAGAAACTCGGATGTGAATCTATCCATTCCCCCCTATTGCTTTTCTACAAGTAAAGCAATCCGCCGCGGTACTGAAGAGATTCTGTATCGAAACTGGTCTGCACAATTCACATTGGCACCTGTATACTGCTGCGAAATCTCTTTTACATCA…
18	562	45	479	435	+	LINE/Penelope	ATAGAATATCATGTAGTAGTTTCAAACACGTGAGTCCACTAATATGAATGTTCTTGCATCATGCGATATCACTATTATGTTGCCAAGGCAACAATGCCATGCTAACAATTAGTTAAGCATAAACTAATGCACTGCCAATCACACTGTATGATCTTATCTTATCTTAATCAGATTACATAAAGATAAGATATCAGAAGGACCAGGAATAATCTTTCTGTTACCAAGATGGAAACTTGGATGTGAATCTATCCATTTCCCCTATTGCTTTTCTCTATAAGTAAAGCAATCTGCCATGGTACTAAAGAGATTCCATATCAAAACTGGTCTGCACAATTCACATTGGCACCTGTATACCACTGCAAAATCTCTTTCATAAACAACCTTCATTCAAAACACACA…
19	708	3502	4407	906	C	LINE/Penelope	AATTCCGGTATATTCATAATACCTGGTTATAACTAGTGTAAAATAAGACATTATGTAGTAGTTGCTACATTGCTAGTTCACTAGCATTAATGTGTTGCATCACGCGATATCACTATCGTGTTGCGTAGGCAATGATGTCACACTGACATTAGTCAGGATGATGTATTATACTTTCCGAAACATCACGTGACCATATCACATGATCTTGTCACATGATCTTGTCACATGATCATATCACATGATCATATCACGTGACCTTATCTCATCTTTATCAGATTAGATCAGATAAGCGGAAGGACAGGGAATAATTTTTCCATTGCCAAGACGGAATTTGGATATGAATCTATCTGTTCCCCCTATCGCTCCTACTCTATAAGTAGGAAGATCTGCCGCGGTACT…
20	713	840	1355	516	+	LINE/Penelope	CCCTACCCTAACCTAACCCTCACCTTAATGGTTGTTTTCTAATTCCCAATGCATTGTTTATAATTGACTATAAACTAGCAAGATATAGAATATTATGTAGTAGTTTCTACCATGTTAGTTCGCTAACATGAATGTTCTTGCATCATGCGATATCACCATCATGTTGCCTAGGCAACGATGCCAAGCTAAAAAATTAGTCAAGCATAAACTAATGCATTGCTGATCTCACTTGGTGATCTTATCTTATCTTAATCAGATTAGATAAGATAAGATATCGGAAGGACCGGGAATAATCTTTCCATTGCCAAGACGGAAACTTGGATGTGAATCTATCCATTCCCCCCTATCGATTTTCTATAAGTAAAGTGATCCGCCGCAGTACTGAAGAGATTCTGTATC…
21	753	3355	3811	457	C	LINE/Penelope	AATTGACTATAAACTAGCAAAGTATGGAACATTATGTAGTGGTTTCTACCATGTTAGTTGGCTAATATGAATGTTCTTGCATCATGCGATATCACTATCATGTTGCCTAGGCAACGATGCCAAGCTAAAAATTAGTTGAGCATAAACTAATACATTGCCAATCTCACTCGGTGATCTTATCTTATCTTAATCAGATTAGATAAGATAAGATATCGGAAGGACCAGGAATAATCTTTCCGTTGGCAAGACGGAAACTCGGATGTGAATCTATCCATTCCCCCCTATCGCTTTTCTATAAGTAAAGCGATCCGCCGCGGTACTGAAGAGATTCTGTATCGAAACTGGTGTGCACAACTTACATTGGCACCTGTATACCACTGCGAAATCTCTTTCTCAACA…
22	757	25	309	285	+	LINE/Penelope	GTGACCTTATCTTATCATTATCAGATTAGATCAGATAAGCAGAAGGACAGGGAATAAATTTTCCATTGCCAAGACGGAATTCGGATATGAATCTATCCGTTCCCCCTATCGCTCCTACTCTATAAGTAGGACGATCTGCCGCGGTACTGAAGAGATTCCGTATCGAAACTTGTTTGCACAACTCACGTTGGCACTTGTATACCGCTGCGAAATCTCTTTCTCAACAAATCCTCGTTCGAAACACACACTCGTCTCGCTTCGCTCGGCTTGCCCCTAACCCTAATC
23	801	558	1047	490	+	LINE/Penelope	GGTTGTTTTCTAATTCCCAATGCATTGTTTATAATTAACTATAAACTAGCAACATATAGAATATTATGTAGTAGTTTCTACCATGTTAGTTCACTAACATGAATGTTCTTGCATCATGCGATATCACCATCATGTTGCCTAGGCAACAATGCCAAGCTAAAAAATTAGTCAACCATAAACTAATGCATTGCCGATCTCACTTGATGATCTTATCTTATCTTAATCAGATTATATAAGATAAGATATCGGAATGACTGGGAATAATCTTTCCAATCCCAAGATGGAAACTCGGATGTGAATCTATCCATTCCCCCCTATTGCTTTTCTATTAGTTAAGCGAATCACTGCAGTACTGAAGAGATTCCGTATCGAAACTGGTCTGCACAATTCACGTTGGCA…
24	945	3106	5115	2010	C	LINE/Penelope	GTTGTTTCTAATTCCCAATGTATTGTTTATGATGAACGATAAGTTAGCAAGTGTGGAATATTATGTAGTAGTTCCTACCAGGTTAGTCAGCTAATATGAATGTTCTGGCATCATGCGATATCACTATCATGTTGCCTAGGCAATGATGCCATGCTAAGAATTAGTTAAGCATACACTAATGCATTGCTGATCATGCTTGGTGATCTTATCTTATCTTAATCAGATTAGATAAGATAAGATATCAGAAGAACCAGGAATAATCTTTCCATTGCCAAGAAGGAAACTCAGAGATGAATCTATCGATTCCCCCATATTGCTTTTCTATAAGTAAAGTGATCCGCCGTGGTAGTGAAGAGATTCTGTATTGAAACTAGTCTGTACAATTCACGTTGGCACCTG…
25	945	5142	5663	522	C	LINE/Penelope	GGATATGTTTTCTAATTCCGGTATATTCATATTACCTGGTTATAACTAGTGTGAAATAAGACATTATGTAGGAGTTCTTACAATGCTAGTTCGCTAGCATTAATGTCTTGCATCATGCGATATCACTATCGTGTTGCCTAGGCAACGATGTCACACTGACATTAGTCAGGATTATGTAATATACTCTCCGAATAATCACATGACCATATCACATGATCTTGTCACATGATCATATCACATGATCATATCACGTGACCTTATCTTATCTTTATCAGATTAGATCAGATAAGCGGAAGGACAGGGAATAATTTTTCCGTTGCCAAGACGGAATTCGGATGTGAATCTATCCGTTCCCCCTATCGCTCCTACTCTATAAGTAGGACGATCCGCCGCGGTACT…
26	994	989	3797	2809	C	LINE/Penelope	CCAAGACGGAAACTCGGATGTGAATCTATCCGTTCCCCCCATCGCTTTTTTTCTATAAGTAAAGCGATCCGCCATGGTACAGAAGAGATTCCGTATCGAAACTGGTCTACACAACTTACGTTGGCACCTGTATACCGCTGCGAAATCTCTTTCTCAACAAACCTTCGTTCGAAACAAATACTCGCCTCGCTTCGCTCGGCTCGCCCTTAACCTTAACAGATATGTTTTCTAATTCCCGTATATTCATAATACCTGGTTATAACTAGTGTGAAATAAGACATTATGTAGTAGTTCCTACAATGCTAGTTCACTAGCATTAATGTCTTGCATCATGTGGTGTCACTATCGTGTTGCCTAGGCAACGATGTCACACTGACATTAGTCAGGATTATGTAATAT…
27	1064	1	1093	1093	C	LINE/Penelope	CCTAACGGTTGTTTTCTAATTCCCAATGTATTGTTTATAACTAACGATGAACTAGCAAAGTATGGACCACTATGTAGTAGTTTCTACCATGTTAGTTCACTAATATGAGTGTTCTTGCATCATGCAATATCACTGTCATATTGCCTAGGCAATGATGCTCAGCTGAAAATTAGTTAAGCATAAACTAATACATTGCCATTCTCACTCGGTGATCTTATCTGATCTTAATTAGATTAGATAAGATATCAGAAGGACTGGGCATAATCTTTCGGTTGGGATGTGAATCTATCCATTCCCCCCTATCGCTTTTCTATATGTAAAGTGATCTACCATGGCACTGAAGAGATTCCATATCGAAACTGGTCTGCACAACTTACGTTGGCACCTGTATACTGCTGC…
28	1087	255614	256344	731	C	LINE/Penelope	AATCTATCCATTTCCCCTATTACTTCCATTGTATAAGTAATGCAATCTGCCATGGTACTGAAGAGATTCCATATCTAAACTGGTCTGCACAATTCACATTAGCACCTGTATACCACTGCAAAATCTCTATAAACACAACTCTCATTTGGAAGAAACAATTGCCTCACTTCGCTCAGCTCCTTCCTAACCCTAACATCACTTCTGAACACCATGCCATGCTCTGTCCTTTCGATTCCAATGTACCCACTCAGTCTTGACACTAACCATTTCCAGTGTGCCCTTGCACTCACCTCTACACTTGACAACATTATTGCCATCATCCCTACTTTTTATAGTGAGCTGTCTCATGCCTTTTTGAAAGAGCTCTGGGAGCACTCCAAAAAGATGTCGAAAGCAAGA…
29	1209	1745	2454	710	C	LINE/Penelope	ACCCTAACCTAACCCTAACCTTAACGGTTGTTTTCTAATTCCCAATGCATTGTTTATATTTGACTATAAACTAGCAAGTATAGAATATTATGTAGTAGTTTCTACCATATTAGTTCGCTAACATGAATGTTCTTGCATCATGCGATATCACTATCATGTTGCCTAGGCAATGATGCCAAGGTAAAATATTAGTTAAGCATAAACTAATGCATTGCCGATCTCACTCAGTGATCTTATCTTATCTTAATCAGATTAGATAAGATAAGATATCAGAAGGACCGGGGATAATCTTTCATTTGCCAAGACAGAAACTCGGATGTGAATCTATCCATTCCCCCCTATCGCTTTTCTATAAGTAAAGCGATCCGCTGTGGTACTGAAGAGATTCCGTATCGAAAC…
30	1219	2293	2677	385	C	LINE/Penelope	TCAAGTCTATGTAATATACTTTCCGAAACATCACGTGACCATATCACATGATTTTGTCACATGATCATATCACATGATCATATCACGTGACCTTATCTTATCTTTATCAGATTAGATCAGATAAGTGGAAGGACAGGGAATAATCTTTCCGTTGCCAAGATGGAATTCGGATGTGAATCTATCCGTTCCCATATGGCTCCTACTCTATAAGTAGGACGATCCACCGCAGTACTGAAGAGATTCCATATTGAAACTTGTTTGCACAACTCACGTTGGCACTTGTATACCGCTGCGAAATCTCTTTCTCAAACAAATCCTTGTTCGAAACACAAACTCGCCTCGCTTCGCTCGGCTCGCGCTAACCCTAACCCTAACCCAACCCTAA
31	1219	3031	5403	2373	C	LINE/Penelope	ATCTTATCTTATCTCAATCAGATTAGATAAGATAAGATATTGGAAAGACCAGGAATAATCATTCTGTTGCCAAGACGGAAACTCAAATGTGAATCTATCCGTTCCCCCTATCACTTTTTTTCTATAAGTACAGCGATCCGCCGCGGTACTGAAGAGATTCCGTATTGAAACTAGTCTGCACAATTCACATTGGCACCTATATACCGCTGCGAAATCTCTTTCACAACAATCTTCGTTCGAAACAAACACTCGCCTTGCTTCGCTCGGCTCGTCCCTAACCCTAACCTTAATGGATATGTTTTCTAATTCCGGTATATTCATAATACCTGGTTATAACTAGTGTGAAATAAGTCATTATGTAGTAGTTCCTACAATGCTAGTTCGCTAGCATTAATGTCT…
32	1318	946	2040	1095	+	LINE/Penelope	CACAGCTTTAGGTGAATTGCCAAAAACACCTTCGAACGAACCAAAAAGTCCACTGAATACCGCGCTATCCCTCTAGCTTCTCAAGCAACACCAGAGGAACACGTTAGTATGTTAGTCCAAGATTGGGTCCAAGCGGAATACCGCAACTGGAGAACGGACTTACCACATGTTGGGGAACGCATTTTGTCGCTCGCCCAAAACATTGCGATGGCTAAGCTGGAGAAAAAGATAGCCAAAACGACACTTAAGGAAAAAGCAGACGTGGAAATGACAGATGTGGGTGCATCTAAAACCATGCAGGAGACTATCTCTGATGAAGTCAAAAAGGCTTTTGCTGCTGCCCTTAAGCAGAAAGGAGTTGGCGCTCCTCCACCCAGTGAGTATTCAAACTCATCCTCT…
33	1400	43	1197	1155	+	LINE/Penelope	CACTAACATGAATGTTGTTGCATCATGCGATATCACCATCATGTTGCCTAGGCAATGATGCCAAGCTAAAAAAATTAGTCAAGCATAAAAAAATGCATTGCCAATCTCACTCGGTGATCTTATCTTATTGTAATCAGATTAGATAACATAAGATATTGGAAGGACCGGGAATAATCTTTCTGTTGCCAAGACGGAAACTCGGATGTGAATCTATCCATTCCCCCTATCGCTTTTCTATACGTAAAGCGATCCGCCATGGTACTGAAGAGATTCCACATCGAAACTGGTCTGCACAATTCACCTTGGCACCTGTATACCACTGTGAAATCTCTTTTACAACAAATCTTCATTTGAAACACATACTCGCCTCGCTTCACTTGGCTCGTCCCTAACCCTAAC…
34	1400	1794	2591	798	+	LINE/Penelope	TAGGAGACTATCTCAGATGAAGTCAAAAAGGCTGTTGCCGCTGCCCTTAAGCAGAAAGGAGTTGGTGCTCCTCCCCCCAGTGAGTATTTCAACTCACCTTCTTCTTATTCAATAGCTAATCTGTTGAAAAGAAAAAGAAAAGCACAAAATCCCAATGGGAGGGAAGGGAGGGTCCATGATGACTCAACCCAAGAAATCTTGCTCTGAAAAAATGCACGCAGGAAAGCAAGGCAAGGTGGAAATGAAGAAGAATTCAACCAAAGGTTGTAAAAAATTGAAGCATTGAAAAATGCTCGAATTTTGGCTATAAGCGAACACAAGTTCGATGTAGGTAAACCCTTTACTTTTCCTGATGAGTTACTTGAAATACCCTTTACTAATGCTGTCTCACAGATTATT…
35	1409	1	1707	1707	+	LINE/Penelope	AGTGATCCGCCGCGGTACTGAAGAGATTCCGTATCAAAACTGGTCTGTACAATTCACATTGGCACCTGTATACTGCTGTGAAATCTCTTTCACAACAATCTTCATTCGAAACAAACACTCGCCTCGCTTCGCTCGGCTCGTCCCTAACCCTAACTACGTTTTCGAACACCATGCCGTGCTCTGTCCTTTCCATTCCGATGTACCCACTCAGTCTTGACATAAACCATTGCCAGAGTGCCCTCGCGCTCACCTCTACACTCGATGATGTTATCGCCGTTATCCCTACTTTGTATAGGGAGCCGTCTCGTGCCTTTTTGAAAGAGCTCTGGGAGCACTCCAAAAAGATGTCGAATGCAAGGATCTCCTTGGAGACTTTGCAACAGCACAAATTATTAGGAA…
36	1523	5909	6710	802	C	LINE/Penelope	GATCTCACTTGGTGATCTTATCTTATCTTAATCAGATTACATAAGATAAGATATCAGAAGGACTGGGGATAATCTTTCCATTGCCAAGATGGGAACATGGATTTGAATCCATCCGTTCCCCCCTATCACTTTTCTAAAAGTAAAGCGATCTGCCACAGTACTGAAGAGATTCCGTATCGAAACTGGTCTGTACAATTCATGTTCGCATCTGTATACCACTGTGAAATCTCTTTCACAAACAATCTTTGTTCAAAACAAACACTTGCCTTGCTTCGCTCGGCTCGTCCCTAACCCTAACCCTAACCTCAACCTTAACTGTTGTTTTCTAATTCCCAATGCATTATTTATATTTGACTATAAACTAGCAAGTATAGAATATTATGTAGTAGTTTCTACCAT…
37	1545	1	205	205	+	LINE/Penelope	GCCAAGACGGAAACTCGGATGTGAATCTATCCGTTCCCCCATATCGCTTTTTTCTATAAGTAAAGCGATCTGCCGCGGTACTGAAGAGATTCCGTATCGAAACTGGTCTGCACAACTTACGTTGGCACCTGTATACCGCTGCGAAATCTCTTTTACAACAATCTTCGTTCGAAACAAACACTCGCCTCGCTTCGCTCGGCTCGTC
38	1577	375	1608	1234	C	LINE/Penelope	AGATAAGATAAGATATCAGAAGGACCGGGAATAATCTTTCTGTTACCAAGATGGAAACTCGGATGTGAATCTATCTGTTCCCCCCTATCACTTTTTTATAAGTAAAGCGATCCGCCACGGTACTGAAGAGATTCCGTATTGAAACTGGTCTGCACAATTCACGTTGGCACCTGTATACCACTGTGAAATCTCTTTCACATCAAATGTTTGTTCGAAACACATACTCGACTCGCTTCGCTCAGCTCGTCCCTAACCCTAACTTCACTTTCGAACAGCATGCTGCGCTTTGTCCTTTCCATTCTGACATACCCCCTCAGTCTCGACATAAACCATCCCCAGAGTGCCCTCGCGCTCGCCTCTACACTCGACGATGTTATCGCTGTTATCCCTACTTCATAT…
39	1587	1406	3473	2068	C	LINE/Penelope	TTAATGGATATGTTTTCTAATTCCGGTATATTCATAATATCTGGTTATAACTAGTGTGAAATAAGACATTATGTAGTGGTTCCTACAATGCTAGTTCGCTAGCATTAATGTCTTGCATCATGTGATATCACTATTGTGTTGCCTCGGCAACGATGTCACACTGACATTAGTGAGGATTATGTAATATACTCTCCGAAAGATCACGTGACCATATCACATGATCTTATCATATCACGTGACCTTATCTTATCTTTATCAGATTAGATCAGATAAATGGAAGGACAGGGAATAATTTTTCATTGCCAAGATGGAATTCGGATGTGAATCTATCCGTTCCTCCTATTGCTCCCACTCTATAAGTAGGACAATCTGCCGCAGTACTGAAGAGATTGCGTATCG…
40	1597	1210	1697	488	C	LINE/Penelope	GGTTGCTTCTAAGTCCCAATGTATTGTTTATGCTTGGCTACAAACTAGCAAGTATAGAATATTATGTAGTAGTTTCTACCATGTTAAGTTCGCTAACATGAATGTTCTTACATCATGCGTTATCACTATCATGTTGCCTAGGCAACGATGCCATGCTAAAAATTAGTTAAGCATAAACTAATGCATTGCCGATCACACTCAGTGATCTTATCTTATCTTGATCAGATTAGATAAGATAAGATATCGGAAGGACCAGGAATAATCTTTCCATTGCCAAGACAGAAACTCAGATGTGAATCTATCTGTTCCCCCCTATTGCTTTTTTATAAGTAAAGTGATCTGCCATGGTACTGAAGAGATTCCGTATCGAAACTGGTTTGCAGAATTCACATTGGCACC…
41	261	40165	40372	208	+	LINE/R1	TTCTGCATTTATTTCATTTCATTTATATCTGGTGGATGACTGGCGTTCAGCGATGCAGCAATAAGAGGAGGAAAGGGAAAGCATAGCCAATTTGGCTGAAAAGAAATGAGTAGATAGACATGGGGGAGGATAAGGGGATGCCTGTAGGCAGCTTCAAATTACCCAAAAAACCGAAAGGTTATAACAGGAGGGTTTAGAATAAAAGAAA
42	300	137832	138198	367	C	LINE/R1	GGGGTGCGGAGGCGAACGCGGCGAAGAGAGGCCGAAGACGTCGTGGCGGTGGAGGACTGAGCACGTGACGATTTTGATGATTATCTACGTTTCTGTATTTATTTCATTTGTTACACCTGATTTATTGACTGGCGCGTCAACGATACAGCATAGAGAGGAGGAACGGAAAGCATGGCTCTTGTGGCGGAAACCAACTTAGAACTGACGATTCGGGACATGAAGCACCCATTGCACACTGTGTTACATTTGTATATTCATTAGAACTGTATTTAGAGTATCTTAGCGGGGGATAAGGGGACGCCTGTGTATCTAGCTTCAATCGCCCAAAAAGCCGAAAGGTTATAATAGGAGGGTTTAAAATAAAAAA
43	300	163858	164061	204	+	LINE/R1	CAGCAGCTTCAACTACAGCAGCAGACGCATCAACAACTACAGGCTCAGCAGCAGGCTCAGGTCGCTCAGGCTCAAGCACAGGCTGCTCAGCAGATTCAGAGTCAGCAGCAGCAGCAACAGCAGCAACAGTTACAGCAGCAACAGATTCAGCAACAGACTACTTTACGGCAGCCAGCGAGTCCTGCTCAGCAATTGGCGATAAGT
44	300	232834	233193	360	+	LINE/R1	CGGCGAAGAGAGGCCGACGAAGCCGTGGCGGCGGAGGTCTGAGCACGAAGCGTTTTTGATTTCGGCATTTGTTTGCATTCTGCATTTACTTCGCTATTTCTTTTGTTTACCTGGCATTGACTGGCGCGTCAACGATACAGCATAGAAGAGGAGGAAAAGGACACCACCGCCAACTTGGCATAACACGAATTAGACACTGGAGAACGACTGGGAGAAGCACCGACTTGAACTGTGTTTATTGGCCTTATTATTTTAACTGTATTTAAAATTAGAGGAGGGCAAGGGGGTGCCTGCGTATATATAGCTTCAATCACCCAAAAAACCGAAAGATTAGAGCAGGAGGGTTTACAATACATAAAA
45	322	27999	29155	1157	C	LINE/R1	ACCTGCGGCTCGGAAGGGCCATACGTACAAGGGAGAGTGGAGAAACCAGATAAGGTTCTCCTCCTCGGGGATCGAACTGTCATCTCTACGATCATCCAGATGTGAGTAGGATCAAAGCCTTCCTACATCGCTTCAACCTCATCGACGATCCTTATTGCAACTGCGGCGATCCAAATGCGCCCTCCCCCCCCCCCCCCCCCCCCTAAACTCTGCGGAACACATACTGCGGCACTGCCTCCGCTTTACGGACCACCGTCTGGATGCCATGGAAGCCAGCCCCATCCCATTAGAGTATTTTCGCACACCGAAAAGGGTTTGTTCCCAGTTACCATTTCCCAGGCTTGGCTGTTGTACTTAGCATGAAAGGGAAAGGTGGTTGTTGAAGCTACAGTGACAGTC…
46	358	183016	183286	271	C	LINE/R1	CAGGCGAGTCAGCAACAGGCTCAACAAGCCGCCGAACAAGCTCAGCAACAACTACAAGCAGCAATACAGCAGCAGCAGCAACTACAGCAGGCTATCCAAGCCCAACAACAGCAACAGCAACAGCAACCCCTACAGCAAGCACAAGCTCAAGTGCAACAAGCCCAGGCAGCTCATGCTCAGGCGGCACATGCTCAGGCACAAGCACAAGCACAAGCTCAAGCCCAGGCGCAGGCTATGCACGCCGCACACGCCGCCCAGCAGCAGCAGCCGC
47	359	10697	11084	388	+	LINE/R1	CGAGGGGAGAGGCGGGGTGCGGAGGCGACGCGGCGAAGAGAGGTCGACGAAGTCGTGGCGGCGGAGGACTGAGAAAGTGGCGTTTGGTTTTGGTTTTGACGACTGTTTACATTCTGCATTTATTTCATCTGTTTACCTGGTTTATTGACTGGCGCGTCAACGATACAGCATAGAGAGGAGGAAACGGACAGCACGGCCCTCGCGGCGCATATTAAATTAGAACTGACATGCGGGACATAAAGCACCCAATGCAAACTGATATATTTTTGTACATTTATTAAGACTGTATTTAGAGCTCTAGAGGAGGATAAGGGGACGCCTGTGTATTTAGCTTCAATCACCCAAAAAACCGAAAGGTTATAACAGGAGGGTTTCAAATAATAATAAA
48	483	39376	39831	456	+	LINE/R1	CAGTTTGATATTAGGAACGGCCTGAAGACGGGTTAGACGAGGAAGATTGAGAGAGAGATAGAGACGAGGAATGGCTGTTGGGGTGGCCAGATGAGAGAGGCGAGGAGGAGAAGAGCATGGACGGAGCAGAAGAGGACGGAAATGCCGTGGCGGCGGAAGAGAACTGAGTACTTTGGAGTTTTGATACGATTTACATGATCTGCATTTATTTCATTTGTTTACATCTGGTTTTTGATTGGTGCTTAACGACGCAGCAAAGAGAGAGGAGGATACGGAAAGCATAGCCAATTTGGCATTTAGAATTAGAACTGATAAACGGGAGGGAAGCACCCGATAAACTCTATATTTATTAGTAGAAACTGTACGAAAAGAGACAAGAAGAAGACAAGGGGATACCTG…
49	499	12073	12369	297	C	LINE/R1	GAGAACTGAGCACGTCGAGAATTGGACTAATTGCACTCAATCCGCGTTTATATTTCACTTGTTACTTGTTATTTGATTGGCGTTCAGCGATACCGCAAGAAGGGAAGGATACGGAAAGTACGGCCGTTCGACCTCTAGAATTAGGACTGCACACGAAGGGAGGGAAGCACCCAATGAAGAACTGTATATATATAGATTACTGTACAATACGGAGAGGAAGAAAAGGGGACGTCTGTAACTAGCTTCAATATGCCTAAAAATCCTAACGGATAGAACAGAAAGGCTTTAATAAAAAAA
50	526	14064	14347	284	C	LINE/R1	GCACCAGCAGCAGCCGCATACGCCGCATCACCCGCACCAGGTTCATCACCAGCAGCATCCGCCGCAACCTGTGCATCCCCAGCAACATCAGGTTCAGCAACATGCTCAGCACCAACCTCATACTCCGGTGCATCATCATCAGCAACACCAGGTACATCAACAGCATCCGCAACATGCTCAACACCCTCAACAAGTTCAGCAACATCATCAGGCACAACATCAGCATCCGGCTCACACCCAGCAGCACCAACAGCAGCCCCCACAGCAGCCGCAGCAAAGGCAGC
51	529	34473	34676	204	C	LINE/R1	CTCGCAACATCAGCAGCAGCTTGTGTTGCAACAGCAACAGCTTGAGGCTGCTAGGAGACAGGTGCAGGCGCAGCAGCAACTTCAGCAGCAGCAACAGCAGCAGATGCAGTTGCAGATTCAAGCTCAGCAGCAGGCCCAGCAACACCAACAGCAACAAGCTCAGCAGCTGCAGTTAGTACAGCAACAACGGACCCACCAGCAGCT
52	606	27549	27876	328	C	LINE/R1	CAGCCTCAGGTTCAGAAACAGAACCAGGCATTACAACAACAGCAAGCCCAGTTGCAAGCTCAACTACAAGCTCAACAACAAGCCCAGGAACGAGCTCGCCAACAACAGCAAGCTCAACAGCAAGCAGCCCAACAACAAGCCCAACAACAAGCCCAACAACAAGCCCAACAGCAGGCTCAACAGCAGGCTCAACAGCAGGCTCAACAGCAGGCGCAAGCCCAACTACAAGCCCAGCAACAAGCCCAGGAGCGAGCTCGCCAGCAACAGCAAGCACAGCAAGCACAGCAACAAGCTCCCGCACCTGTAGCACCCGTAGCGGCACCCCCCG
53	656	126972	127248	277	C	LINE/R1	CAGCAGACCGGATTTCAGCAGCAGCAGCAGCAGCAGCCGGCACCTATACAGTCGCAGTTCACTGGTTTCCCAGGACAGCAGCAGCAACCACAGCTTCAGCAGCAGTTTACCGGCTTTCCAGGCCAACAACCACAGCTTCAGCAGCAGCAGCAACCTCTCCAACAACAGTATACCGGATTCCCAGGTGCCGCACCAGGTGGATTCGGAAATGCACCACCGCCTGTGCCTCAGATCCCTCAGCAGTTCCAGCAGCAGCAACCACAGCTTCAACAGGCAC
54	656	301252	301742	491	C	LINE/R1	ATTCAAATCATCCTTATTCCTATATTTGGACAAAGCGATGGATCAGCTAGTACGCCTAATAAGGGATAGAAAAATGGGTACGCGGAGGGATAGGATACAATGAGAAGCACTATGGAATGGAGAAGTAGAAGGCCCCGGCCGGTTTGGTGAGGAACGGCCTGAAGGTTGCCTGGGAAAGGAAGAAGACGAAGAGGAAGAAGGGGATGAAGAATGGGAACGGGATAGAGTCGAGGAGTGGCGCCTTGGATGGCCGGACGAGAGAGGCGAGGAGGAGGGCATCAACGGAGAAGACGAGGCCGGAAATGTCGTGGCGGAGGAAGAGAACTGAGCAGGTAACGAGGTTTTGACTGTTTACACTTTTCTGAGTTTATTTATTTCATTTCATTATATCCGGTAGAT…
55	656	301735	302018	284	C	LINE/R1	ACCTGCGGTTCGGAAAGGCCATACATACAAGGGAGAGTGGAGGCAGAAACCCGACAAGGTTCTCCTCCTTGGGGATCCAACTGTCACTATGATCATCCAGATGCAAGTAGAACACAGCCACTTTAAGGCATTCTTACATCGCTTCAACCTCATCGACGATCCGTACTATGACTGTGGCGATCCATATGTCCCCGTCCAATCTATGGAACACATACTGTGTCACTGCCCTCACTTTATGGCCCACCATCTAGACGCCATGGATGCCATCCCCATCACATTCAAAT
56	656	316252	316514	263	+	LINE/R1	TGTATTTGATTTCATTTGTTTATCTGATTTATTGACTTGCATACCAATGCATAGATAGGAGGAAACAGTCAGCATGGCCCTTGTAACATATATTAGATTAGAACTGACATGCTGGAGATGAAGCACCCATTGAGAACTGTTATAATTGTATATTAAGACTGCATTTACAATACCTGGAGCAAGATAAGGGGATGCATGTATATTTAGCTTCAATCACCCAAAAAACCAAAAGGTCACAACAAGAGGGTTTAAAATAAATATAA
57	674	169259	169469	211	+	LINE/R1	CTGATTAGAGATACGGATGTGGTTACGAGGCGAGACAGACAGAGGAGAGAAGCGCAGATAATTGAAGACACCGGCCAGTTCGGTGAGGAATGACCTGAAGATCAGGGAAACGAAGAAGATTCGAAGAGGGATCTTGAGGAGAGAGGAGAGGAGGAGGACGACGCCGGTAGAGAGGAGGCCGGAGGAGTCGTGGCGGAGGAGGCACACTGAG
58	677	28175	28380	206	+	LINE/R1	CTGAAGTTGTGATCGCGGCAGAGGAGATCTGAGAAGGCGATGCCTTTCCATATAATCTACGTTTACGACTTGTTTGTTTACTCGCTTGTTTGATTGGAAGTCACAGGGTGTAGCACATAGAGGAGGATACGGAAAGCATAGCCTGAAGGCATTTAGAATTAGAACTGGGTAACGGGAGGTGAGCGCCCGATACACACTGCTTTATT
59	799	208243	208519	277	C	LINE/R1	CCAGCAGCAGCATCGGCGGCATTTCCAGCGTTACCAGCAGCAGCATCACCAGCAGCGGCATTTCCAGCGTTACCAGCAGCAGCATCACCAGCAGCGGCATTTCCAGCGTTACCAGCGGCAGCATCACCAGCAGCGGCATTTCCAGCGTTACCAACAGCAGCATCACCAGCAGCGGCATTTCCAGCGTTACCAGCGGCAGCATCACCAGCAGCGGCATTTCCGTTGGCGGCGTTTCCAGCAGCAGCTTCAGTACCAGTAGCCCCTCCAGCAGCAGCCT
60	805	5007	5463	457	+	LINE/R1	CTCAACAACAACAGCAAAACCCCCAACTCCAGCAGCAGCAGCAGGCAGCCCAGGCTCAGGCTCAGGCACAAGCTGCTCAGGAGCAGCAGCAACAGCAACAGCGTGAGGCTCAAGCCCAAGCCCAAGCGCAACAGCAAGCACAGCAAGCACAGCAAGCGCAGCTCCAGGCGCAACAGCAGCAGCAGCGGGAACAAGCCGCCCAAGTTCAAGCACAGCAGGCAGCAGCGGCTCGACAAGCGCAGGAACAAGCGCAGCTTCGAGCGCAGCAAGCTCAAGCACAGCAGCAGCAGGCACAGCTCCAGGCCCAGCAGCAGCAGCAACAACAGCAGCTGCAACACCAACAGCAACAAGCCCAAGCTCCACCTCAATCTCAACCACAGCTTGGACAACAACAACCCC…
61	805	5634	6087	454	+	LINE/R1	TCAACATGGCCAACCAACAGCGCCAGCAAGTTCCCCAGGCGATGTCCCCCAACCAACCATCTATGCAGCTCCCCCCGCAGCAGCAAATGCAGGTACCTCAAGGAGTTCCCCAGGGTATGCAACAGCAGCAGCAAGTCCCTCAAGGCATGCAGGCGCAGCAACAGCAAGTCCAGCAGCAACAAGCAGCCATGGGTCGTTCACCAGCTCCTGGTACCCCTATGACTGCTGGCCCCAACTCACCTGCTCCACCTCGACCCGGTAGTGCTGCGCCACAGCAGCAGCAGCAGCCTCCGCGTCCCCAGAGTGCCGCCGGTACCCCCATCCAGCAGCAAGCCCAGCAGCAAATTCCCGGACAACCCGGCCAGCAGCAGCAGATTCCCCGTCCCCAGTCCGCTATCC…
62	845	341888	342222	335	+	LINE/R1	GCAAGAGCAGTTTCGCTGCGAACAGCTTCAGCAAGAACAGGCAAGACAGGAGCAGATCCGTCGCCAAGAAGAGCAGCGAAGACAGGAGCAGCAACGTCAACACCAACAACATCAACAGCAGCTTCAGGCTCAGCAACAGGCGCAGCAACAGGCTCACCAGCAGCAGCAACAACAACAACAACAACAGCAGCAGCGTGGTCCTCCTCCGCATGTTCAGGCACAGCAGCACCCTCATGTGCAGTCAATGCAGCAGGCACAGCAGTCGTTGGCACCGCTCCAGACTGGTATGCACCCTCAGCAGTCTCAGCACCAGCAGCCACAGCATATGCAGCAGC
63	851	18683	18991	309	C	LINE/R1	GCAGCAGTATGCTCAGCATCAGGCGCAGCAGGCACAGGTTCAGGCTCACCAGGCGCAGGAACAATATCAGCAGCAGTACCAGCAGCAGCAAGAGCAGGCTAGAGGTACACCTCCGCCTAATCAAGCCTACGCACCCCAGCCGCCGCAGCAGCAAGAGCGGGAACAGTACTCCCAACAGCAGTACCAGCCCCAGCAGCCAAGTAGAGGCTCTACACCCGCAACTCAGAATCAACCACATCAACCACCCCCACCTCTGAATCTACAGCACCAGCAGAAGCAGTATGTGCCATCACAGCATAGCAGAGGCAC
64	1003	174396	174624	229	C	LINE/R1	TTGATTGGTATTCAGCGATGTAGCAAAGAGAGGTAGACACGGAAAGCACAGCCGAATTGGCATTTAGAATTAGACCTGATAAACGGGAAGGAAGCACCCGCTAAACTCTGTGTTTGTTACTCGACACTGTAGGAAAAGAGACTAGAGGAGGATAAGGAGACGCCTGTAGAATAGCTTCAAATCGCCTAAAAACCGAAAGGTAAGAACAGGAAGGCTTTAAAATAAATAA
65	1003	208953	209559	607	+	LINE/R1	TATTCGGACAAAGCAGTGGATCAGCTGATAAGCCTAATAAGGGATACCGACATGGGTATGCGAAAGGATAGGATACAATGAGAAGCACTGCGAAGTGGAGAAGTGGAAGGTCCTAGTCATTACGGTGAGGAACGGCCTGAAGACGGCCTGGGCGAAGAAGAGGAAGAAGAAGAGGAAGAAGATTGGGAACGAGATAGAGACGAGAAATGGCTGTTTGAATGGCCTGACGAGAGAGGCGAGGAGGAGGGCATGCACGGAGAGGATGAGGCCGGGAATGCCGTGGCGGCGGAAGCGAACTGGGTACGTGGAGAGTGTATGGTTATTTGCACATATTCTGCGATTTATATTTCATTTGTTTATATCTGGTTGATGACTGGCGATTCAGCGATGCAACAATAA…
66	1116	136683	137079	397	C	LINE/R1	CTCAACAACAGGCGATGCGTATGCAGCACCAGCAACAGCAGCAGCAACAACAGCATCAGCAACAACAACAACAACAGCAGCAGCAGCAACATCAGCAGCAGCTTCAACAAGCTCAAGCTCAAGCCCAAGCTCAGGCCCAGGCGCATCAAGTTCAGCAGCATCAGCAGCAGCGTCAAGAACAACTCGCGGCCCAGCAACAAGCCCAACAGCAGCAAGCTCAACAACAGCAAGCCCAAGCCCAAGCCCAACAGCAAGCTCAGGCTCAAGCCCAACAGGCCCAACAGCAAGCTCAACAGCAACAGGCCCAACAGCAAGCTCAACAGCAGCAGGCTCAACAGCAAGCACAAGCCCAAGCTCAGGCGCAGGCGCAGGCAGCACAGGCTCAAGCTCAGGCACA
67	1216	53488	53718	231	C	LINE/R1	CTGGTTGATGATTGGCGTTCAGCGATACAGCGATTAAGAGAGGAGGAAACGGAAAGCATGGCCAAATTGGCATACAAGAATTAGGACTGCTAGATGGGAGGGAAGAACCCGATAAATACTGTATTTATTACTAGAACTGTACTGTTACAAAGACTTAGCGGAGGATAAGGGGACGCCTGTAGTTTAGCTTCAAATCGCCCAAACAACCGAAAGGTTATAACAGGAGGGTTT
68	1375	280292	280533	242	C	LINE/R1	TTCCGCGTTTATATTTCATTTATTATCTGTTATTTGATTGGCATCCAGTGAGACAGCACACGGGAAGGATACGGAAAGCACGGTCAAATTGGCACTTAGAATTAGACCTGACGAGAAGGGAGGGAAGCACCCGACAAAACACTGTATTTATTAAACTGTACTACGAAGGATTAGAGGAGGAAAAGGGGACGCCTGTAACTAGCTTCAATACCCCTAAAAACCTCATGGTTATAACAGGAAAG
69	1483	21197	21475	279	+	LINE/R1	ACATATTCTGCGATTTATATTTCATTTGTTTCTACCTGGTTGATGATTGGCGATTCAGCGACGCAGCAATGAGAGGAGGAAAAGGAAAGCATAGCCAAATTGCCTAAAAACGGATTAGGACTGATATGTACGGGATATGAAGCACCCGATAACACACTGTATTTATTATCTACTAGAACTGTATTAGTTAGACATAGAGAAGGATAAGGGGATGCCTGTAGACTTAGCTTCAAATTACCCAAAAAACCGAAAGGTTATAACAGGAGGGTTTAAAATAAA
70	1483	61665	62123	459	C	LINE/R1	TCAACAGCCAAATAACGTAACTGCCCAGCTCGTCCAGGTTGCCGTTCCCAAGATGTCAATGCCTGTTTCCCCCGCTGCTCAACAGCTTCAACTCCAACAGCAACAGCAGCAACAGCAGGCTCAGCAACAGGCCGTACAGCAGGTCGTTCAACAAGTCCAGCAACAACACCAGCAAGCCCAGCAGGCCCAGCAGCAGCAGCAGCAAATGCCCTCCCCTCAGCAACAGCAGCAGCAGATCCCTCAGCAGCAGCTCCAGCAGACCGTACAGCAGGTCCCCCAACAGCAGCTTCAGCAGCAGCTCCAGCAGCAGGCTCCCCAACAAGTTCAGCAGATCCAGCAAGTCCAGCAACAGATGGCCTCTCCCCAGCAACAGCAGCAACAGGTACAGCAACCTCAGCA…
71	5	6	1780	1775	C	LINE/Tad1	GCGGCTCCAGTGATAGCCAGGGAGGTGACGAACTGGGCCGTTGATGATGCCATCGCCACTGGCTCAGACCATGAGGTCATTCGCTTTCAATTAGACTCCCTCCACCCCGACCTTGACACCACATCTACCACCCCCCACCTGAACTGGCACAAGACAGACTGGGCAGTCTTCACAGACACCCTACAATGGCTGTCTGACACCACCTACCCCCGCTGGACCCATCTCAGAGCCAACCCCACTGCATGACACTTAGACAAATGGGCAATCCTTCTCCGGGACGCCATTCAATCTGCAGCCAAAGCTGCCACACCGGTGTCGGTCCTCACGTCCCGCTTGAAGAGATGGTGGACAGCAGAACTGGACCAAACCCGCAAAGCTATGACCAGTGCCTGTAGATGC…
72	5	1786	3651	1866	C	LINE/Tad1	CAGGTCATGGACCATGACTGCTCCCTCATCCGGGAAATGCACCACCTCCTGAAACAACTAGTACCCACCATTCTCCCCACCAACAAAACTTCACCCCCCATGCCCAACATTACACCATCCCTCCCCAAGCACACCACTACCCCGACCTTCCTGACGACCGCCTCTGTTGACTACGGGAAGCAACGATGCCTCACCACAGAATCTGAGCTCAAAAAGCATAACCTCGCCACCCCCACACCCTCTGCGAAGCCCACCTCCTGACCTGCCAAACCCTGGACTGGTATCCCATCAGCCAACACCCTCTTTCCCGATGCCATCCCTACCCCACTCAACCATCCCTGAAAACCCCGAAAGCCCCTGCCCCTAGGAAGAACCCCTCCCATACCCAGGACATAGTTA…
73	7	1288	3143	1856	+	LINE/Tad1	TGTCACTCGACTACCCCCCCCCCTGTGTTCTCAACAACCACCCAGCAATCGCCAGATTTTCGAGCGGATTATTGTTCAGCGCCCCCAATTTACCTATCCGCAACATTTTCAGCCCAGGCCCTCTCTTTTTCATCGCGTTACATGGTGAAAAAGGGATCTCCGGGCCCCTGAAGAAGTCCAGTGGACAGGTCATCAACACCCCACCCCACAAACAACAAAAATCAGTGATATTCCGGCGGAATCTTTGTCGCGTCCGCAAACACTACTTATCCCGAAATTCCGATGCCTCCCCACTCCTCCATTGCGGAGAAACAACCTCTCCCTCCTGACAAACCTCCCTCACGCGTGCTCGCGAACAAAAACCGCGCTAGCGCAGAGCCGCACACTATGCAGGAATGC…
74	8	336	965	630	C	LINE/Tad1	CCTCCCACAGAAGCATACCCTTCCCGGCGATGCAGCTGCTCTATCCATCCGCCACAGACACCTCGACACCTGCTGCTGAGCTGCCCCACATTCCAGGCCGCGCGCTCTACACTCAGGAAAGACCTCAGGCTCAAACAACACTCCCCGATCAACCTCAACACCATTCTGGACACCCCTCCGGCACTAAGGCCCTTTCCACATTTATCTCTGCGACTAAGGTCGCTACCTCGACCTGGGCACACTCCCGGCTAGAGAGGACGCGCAGAAGGGGATAGACCCTACCGCTGACTACACTGACCGCAGTGCTTTAGGAACTTCCACATGCACCAATTTTGTAGAGTCTTTACGATATTTCTTTGTTACGGGGCGGAGGAAGTACATGAGGCGAAATGAGGGGAG…
75	8	1145	3990	2846	+	LINE/Tad1	TATCACTCGACTACCCCCCCTCCCCTGCGTTCTCAACAACCACCCGGCAATCGCCAGATTTTCGAGCGGATTATTGTTCAGCGCCCCCAATTTACCTATCCGCAACATTTTCAGCCCAGGCCCTCTCTTTTTCATCGCGTTAAACGGTGAAAAAGGGATCTCCGGGCCCCTGAAGAAGTCCAGCGGACAGGGCATCAACACCCCACCCCACAAACAACAAAAATCATCGATATTCCAGCGGAACCTTTGTCGCGTCCGCAAACACTACTTATCCCGAAATTCCGATGCCTCCCCACTCCTCCGTTGCGGAGAAACAACCTCTCCCTCCCGACAAACCTACCTCACGCATGCTCGCGAACAAAAAACACGCTAGCGCAGAGCCGCACACTATGCAGGAAC…
76	8	3995	7203	3209	+	LINE/Tad1	GCGGCACCGGCAGTGGCTAGGGAGGTAACGAACTGGGCCGTCGATGATGGGAAAGCCACCGGCTCCGACCACGAAGTCCTCCGCTTCCAAGTCACCTCATTACACCCAGACGTAGACACTGTATCAGGAACGCCCCGCCTGAATTGGCACAAGACAGACTGGGACGTCTTCACAACCACCCTTCAAAAGCTATGCGGCGCCTCACACCCCCAGTGGACCCACCTCCGATCTCACCCCTCCGCTCATAACCTAGATGCCTGGGCAGCCCTCATCCGAGACAACGTACAACTCGCCGCCCAGGAGGCCACCCCACAGACGGTCCCCTCACCCCGGTCGAAGAGGTGGTGGACGAAAGAGCTGGATGAAACAAGGAAGGCTATGACGAGAGCGCGCAGGAAC…
77	11	2928	4930	2003	+	LINE/Tad1	CCCTGCCTTTTCATCAACCACCAGGAAATCATCAGATTTTCGAGCGGAATACTGATCCCCAGGCCCAAATTACCCATACGCAACTTTTTCAGACCAGGCCCCCTCTTCTTTGTTGTTGACAGCAGCAAAGAAGAGATCTCCAGGCCCCTGAAAACATCCCGCATACAGGACATCAGCAACCCCCCCCCCACACAACGCAAAATCATCAATTTTCTGGCAAATCCTATATCGCAACCTCCTACTCTACCCATCCCGAAAACCCGATGGCCCCCCGAACCGCGACCATCAAGAAACGCCCCATACCCCCCGACAAAACCCCTACACACGACCTCACCACCAGCCAACACACTAACGCAGAGCCGCACGCGACGCAGGAATGCAACGCACTGCACGACGATA…
78	12	1	427	427	C	LINE/Tad1	CCCCCCTGCATTTTCAACAACCACGCTGAAATCGGAAGATTTTATTGCGGATTACTGTTCGGCAGCCCCGAATTACCTATTCGCAGCATTTCCAGACCAGGCTTACTCTTTTTCGTTGAGTTTTCATCGAAAAAGAGTTTTCGGGCCCCTGAGAAAAGCCCCGCGAACACGGTTCCATCAACACCGCACCCCACACACATCAAAAATCATCATTTTAATCGCGGATTCCTTGTCGCTACCGCAAAAATACCTTATCCCGAAACTCCGATGCCTCCCCGATCCTCCGCTGTTGAGAAACAGCCCCTCCCCCCCGACAAAGCACCCCCTCGGACGCTCGCGAGGAAGAAACGCGCTAACGCGGAGCCGCAAGTGCCTGACACGTCCGATGCGGAAATGCAC…
79	12	509	2018	1510	+	LINE/Tad1	ATGAGTATGACCACCCATGGCACACCCCAGGAAACACCCTGTCCCGCCTCCTCCACGTCATCAACACACACTCCCCATGGGTCCGACCCAATGCCGAGATCGAGGACACCTCCCAAAACATACCCGATGATGCCCTCACCCCTACACTGACAGTTGACATCTCCCCCTCTCCAAAGGACGAGGCTGCCGATGACCACCTCCTCCTACTCCACACCCATCGCCAACAGCCGAACACCATTCTACTATACACGGATGGCTCCCAACTTGACGACATGACAGGCGCTGGTTACACCATTCCCCACGGACTGCCACAACCTGTTAATGCAATAGTCCCCATGGGCGACAGAACAGAGGTCTTCGATGCGGAGATTAGAGCCATCCACGAAGGCCTCCGAACAT…
80	12	2408	2643	236	+	LINE/Tad1	TTGGGAGGAAATAAAGGCGGAAAAATGGTTAAAAATGGAAGGGGAAGGGTGGAGGAAATGGGGGAATGACCTGGCGAGGTGGCCTCTGAGTGCACAGGGCTCCTGGAACACACGATGTGAGATGGATTGTGAACCAAATGAGACTTAGGGGACTACAACCCCACACATGAAGACTGCTCTGGGGCATATCCCAGTGGGGACCTGGGGTAATAGCCAGGCCCTCAAGTATGTATTTA
81	12	2718	3608	891	C	LINE/Tad1	TAGCGGCGCCAGCTGTTGTGAGGGAGGTAACAAACTGGGCGATCGACGAGGAAAACACCACCGGCTCTGATCATGAAGTGATCCACTTCCAAGTGGACTCACTCCACCCTGACCTGGAGTTCAACACCCCGTCACCTCCTCTTAATTGGAAAAAGATGGACTGGGACACATTTATGATTACCCTCCAACAACTCTCCGAAGCCAACAACACCCACTGGAGGCACTCATCCAGAAACCCCTCCCCAACAAACCTGGACTCCTGGGTGGAAATGCTGTGAGACATCATCACTGAGGCAGCAAGTGCCTCCACCCCATACCTCACCACCTCATCCGGCTCCAAACGGTGGTGGACAGACGAAGTGACAAGCACCCGCAAAGCCATGACTCGTGCCCACAAGA…
82	12	3612	5257	1646	C	LINE/Tad1	ACCCCACCCCCCCACCTATCCCCCCAGCCCGACCCCCCCTCCTGTACAACACACTCCTGCACCCGCTCAACCCTGGAAAGGCACCCCTGCCTCGAAGGCTCTATTGACTGCAGCCCCCAAGCCGAAATAACAGGCCCCAAAAAACTGCCTGAAGAAAACCCGCCACCCCCAGGAGCTGGTAATCCCCTACTCTGACCCGCAAGCCCTCCCAGACGGCATGAAGGCTGCCATCGCAGAGGCCATCAGCAAAGCTCTAAGAGCAACTGATGCCCCCGCCAACGTAGGTGTCCTCATGGTGAGAAAGAACATGTCAGGGAACATCCTGCTCAACCTTCGCCCTGACACCCCCCTCCCCAAACTGCTCATCCCCTTCCCCTCATCAAAAAAACAGTCCAGAAC…
83	12	6086	6402	317	C	LINE/Tad1	CCCCCCCCCCCCTCGCATTTCCAACCACAACCCATAATCCTGCGGATCTTCCGGTGGAATTCGCATCAGCAACCCCAATTTACCCCTCCCCGGCTTTTCCAGGCCTGATTTTCCATTATCCATTGAGTTACAGTGTGAAATTTGGATCCCGGAACTTTTTGGCTGGTCAGCAGACCTCACTGTCAATGCCGCCCCACCCCCTGCCCGTGGAACATCAATCAGACACCGAAAACCCTTTCGCCACATCGAAAACAAACCGCCTACAAATTTACAACCCCCCCACATCTGTCGTTGTGGCACAACACCCCTCCTCTCCC
84	12	6434	6755	322	C	LINE/Tad1	GATGTATGGGGGGCCTTCAACAATGTGTCTTCTGAATGCCTACTATATACAATGTGCCAACTGGGATGCCTGGAGCCCATGCTGATGTGGGGAGCATCCTTCCTGTCCAACCGAACTACAGCACTGTCTTTCGATGGCTGCACCGATGAACAATGCCCCATCTCAACTGGGATCCCGCAAGGTTCCCCAGCATCACCCATGCTTTTTCTCCTGTACCTATGCCCACTCTTCGACGAACTCCACCTCGCCCATGCCCACATATGGACCCCAAGTTATATTGATGATGTAGCATTGGTGGCCCATGGATGCACCAGAGAGGACA
85	12	6826	7150	325	C	LINE/Tad1	AGTGAGAGTAGCCAGGAGGGCACGGAAAAGGGGACAGAGGGGAGGAGGTGAGGGTTGCAGGTGGTCCGAAGGTGTTATCTGATTTCTTTTGTTTGGGAGGAATTAAAGGTGGAAAAATGGTTAAAAATGGAAGGGGAAGGGAGGAGGAAATGGGGGAATGACATGGCGAGGTGGCCTCCCAGTGCACAGGGCTCCTGGAACAGATGACGCGAGATGGATTGTGAACCAAATGAGACTTGGGGGACTACATCCCCACACATGATGACTGCTCTGGGGCATATTCCAGTGGGGACCTGGGGTAATAGCCAGGCCCTCAAGTATGTAT
86	22	1	1950	1950	+	LINE/Tad1	CCCGTAACCATAGACATACCTGACCTATCTAAGGATGTACCACACCTGCTCACCTCCACCTCATACACCGCCTCCAGCAGGACTGTCAAAACGTCATCATATACACCGATGGCTCCCAACTCTCCACCAACACCGGAGCCGGCTACTACATCCCGCACGGCCTACCCCAACCCCTCCATGCAATTGTCCCCATGGGAAACACCACCAAAGTCTACGATGCAGAGCTGAGAGCTATCTACGAAGCTCTGTTGTCCACTCGCACCAATATCATCTGCCATAACCTCCTCCAGCGCAAAATCCACATATTCACAGACAATCAGTCTGTGATATGCCGCACTTCCCACCTCCGCTGTGGACCAGGCCAGGAAACCGCCTGCAACATCCACGAATTAATCACCT…
87	22	1953	2243	291	+	LINE/Tad1	CGTCATCACTGTTCCTGGATGTCTGGGGCGTGTTTGACAATGTCTCCTCCGCGCGCCTACTAACCACTATGCGCACCCTAGGTTGCCCGTCCGCAGTAACCTCCTGGTGCTCCTCCTTTCTTGATGAACGCACGACAGCTCTCTCCTTCGATGGCCGAACAGATGCCCAAAGACCAATCCGAACGGGTATCCCCCAAGGTTCCCCCACCTCCCCAATCATCTTCTTAATGTACCTCCGCCCCCTCTTCGACGCACTCAATGCCACCCACCCCTCTCTCTGGACACCAAGTT
88	23	14572	16275	1704	C	LINE/Tad1	GCCAATCTCCAAAAGGCCGTGGTGCAGTCTGTCGCTACATACGGTATTGACATTAATGCCGCTCGCCGATATCCCTCTCATGACGTCGGCTGCATCGCCAGCCTCTAACTGATCCTCAACCATGAAGCCCGAGTGATCACTGGATGTTTACGAACAACCCCCCTTGGCTTCCTCATGGCAGAGGCAGCCACTCGCCCCGCTGAAGCCATAGTGTGAGGTCGGGAAGTGTGCTTTCGCTCACGAATTCTCACTCATGTTGCACCGAAGCCAATGTCATCCCTTCCACAGGCCACCTCGACTGAAGACGTTATCTGACACCTCACCCAATGTGCTGCGTCATGGTGTGGATTCTCAGAGGTCGAAAACATATGCCAACCCTCACCATTGGACCACAAACGC…
89	26	339	2606	2268	+	LINE/Tad1	ACCCGGAAATCGCCAGATATTCGAGCGGATTATTGTTCAGCACCTTCAACTTACCTTTTTGCAGCATTTTCAGACCAGGCCCTCTCTTTTTCGTCATGCTACATGGTGAAAAAGAGATCCTCAGGCCCCTGAAGAAGCCCTGTGCAATGGTCATCAACACCACATCCCACAATGACCCAAAACTATCAATTTTCCAGCGGAATCCCCATCATGCCCGCGCAAGCTACCTATTCCGAAAATCCGATGCCTCCTTGTGCCTCCGCTGTGGAGAAACAACCTCTCCCCCCTGACAAACCTCTCATATGCAACCTAGCAAACAGCCAACACGCTAATGCAGAACCACACACGATGCAGAGATGCAATGCATGCCACCACATGATGCATGTTGATGTGCAATAT…
90	29	3855	6648	2794	+	LINE/Tad1	AACCACCAGGATATCTGCAGATTTTCCAGCGGAATCTTGATCGGCGACCTCAACTTACTTATCTGCAGCTTTTACAGATCCGGCCCTCTCCATTTCATCGTGTTCCATGGTGGAAAAGAGATCCCAGGGCCCCTGACAAAGCCCAGCGAACAGGTCATCAACACAACACCCCTCACAACTCAAAAACCATTAATTTTCAAGCAGAATCCTCGTCGCAGCTGCCAACACTAACCTTTCCGAAAATCCGATGCCACCCAGTACCTCCGTTGTGGAGAAACCACCGCTCCCTCCTGATAAACCTCCCTCACACATGCTTGCAAACAAAAAACGTGCTAGCACTGAGCCGCACACCATGCAGGGATGCGACGCGATTGATGACGAGATGCACATCGACACATG…
91	29	6650	7919	1270	+	LINE/Tad1	TTGGTCGCCCTGTCGATGGCAAGGGAAGTATCAAACTGGGCAATTGATGACAGAATTGCCACGGGATCGGACCATGAAGTAGTCCGCTTCCAACTGGACTCCCTCCACCCAGATCATCCAGCCTCACCTACCACCACATCCCTGAATTAGCGCAAAGCAAATTGGGAATCCTTGGTGACAGAGCTACAACACCTCTCTGAGACAGCGTATCCCTGCTGGACCTACTTCTTTGCAAACCCGTCTGCCTGCAACCTTGATGAATGGGCAATCCTCCTCCACGACTGCATACAGAAAGCAGCCACCACAGCAACACCAACCTTAACCCCCACACCGCCATCAAAGAGATGGTGGACGGAGAAAGTAAGCAGGATGTGGAAGGCGATGACAGGTGCCCGAAAA…
92	29	7992	8333	342	C	LINE/Tad1	GAAGCAGGATGGGAGGGAGATCAAGGGCAGAGAACTGAGAGGGACAAAGGAATGGGGAGATAGGAGAAGGGATGAACTGGGCGCAGAGATTATCTTTTTCTTTTGTTCAGCAGGGGAAATACAGGCAGGAAAATGTGTAAAACAGGGCAGGGGAAGGGTGGAGGATGGAGGGGAACCTGGCGTGGTGGCCCCAGAGCAAACAGGGCTCATGGACAAGATGATGCAAGATGGACTAAAACAGAGAGAAAAAGGAGGAGGCTACACTGCCAACCACGATGACTGCTCTGGGACTTATCCCAGCAGGCTCCTGGGGTAACAGCCAGGCCTGAACTTATGTATATA
93	29	8712	9304	593	C	LINE/Tad1	GACATCGACGGCAATGATGAAGCCGACCACCTAGCAAAATTGGCAGCATCCCAAGAACCCACCATCTCCCCCCCAGTATCCATCTCCTGGCTCCATCATCGGGTCAAAGAACAACAAACCGCAGATTGGACAACATGGTACGATGCCTCACCCAAACCCAAGACATACTGCGCCCCTCACCGATGGCACTTGGACACCGCGTACACCTCCCTACCCTGCCGACAATCCGCCGCAATCCTCGGCCCCCGAACCGGACATGGATACTTCCTGGACTGCCTTGCCTGTCCCCCCACAGACAACTACCCCTCCCAATATTGCCCATGCCCAATGCACCCACCCCAAACCCCCAAGCACCTTCTCCTATCCTGCCCGATTTACAATGCAGCATGGAACAAATTG…
94	30	6	2317	2312	C	LINE/Tad1	TTCGAGAGTAAGGTTGAGGCCTTTCAAGCACTCTTCCCGCACCCCCCCCAACTACCCCCCAGACCCATAATGCTCGCTCTTCCCCCAAAGTCCGCTGGCGCACATTCACCCCGGATGAAATTCGCACTGCTATCTTTACCTCTTCCCCGAAAAAAGCCCCTGGCCCTGACACCATCACATTCACATACCTTAGAAAAGCATACGACGCAATCCCCTATGCGTTCAACGCGCTATACTCGGCGCTCGGTGAGAAAGGATACCACCCAAAGTGCTGGCGAGAAGCTACCACAGTGATCATCCCAAAGCCAAATAAGCCCGACTATAGTGCAGTGAAGGCATACTGACTGATCGCATTGCTTGACTGCATGGGAAAGGTTTTGGAAAAATTGATGGCGACGC…
95	32	3	1813	1811	+	LINE/Tad1	CAAATGGCGGAGTCACACAACCTCCTGCACGATGACCATATTGGCGGTCGCCCTAAGCGCTCGGCAATCGATGCCGCGATGGTGCTAACGCACGATGTCAAAGCGAATGCAGGCCACCGCCTCATAACGTCATCGCTATTTTTAGATGTTACAGGTGCCTTCGACAATGTCTCCTCCACATGCCTCCTCGACACAATGCGCACCCTCGGCTGCCCCAACGCCGTGCTCTCCTGGTGCACATCTTTTCTAAACGAACGAACCACAGCACTATCCTTTGATGGGAGAACAGATAGCCAGCGCCCGATCAACACCGGTATCCCCCAAGGGTACCCCGCCTCACCAATCCTTTTCCTTGTATACCTCCGCCCCCTCTTCGACGCCCTCAACGCAGCACACCCG…
96	33	701	1777	1077	+	LINE/Tad1	ACGAAGGCCTCCGAACATGCCTCACACATATTCGACGCCACGGCATCTACAACAAACACATACATGCCTTCACAGACAATCAAGCTGCAATTCGCCGAACCTCCCACCTCCACCGCGGCCCTGGCCAGGACCTCGCCCGGGCCATCCACAACACCGCCCATGACCTTCACGAATTCCGCACTTCCATTACCATACGCTGGGTCCCAGGACATACCAACGTGCCCGGGAACGAAGCCGCCGACGAACTGGCTCGACAGGCGACCACAGTCACGCCACTTCAACAACTACCGATATCCCTCACCTGGATATGGCGCCGCACTCGAGAATGGTACACCGAAGACTGGGCTACCTGGTTTACCTCATCCCCTCAGCCACGCACATATGCCGCTACACACCGCC…
97	35	7093	7348	256	+	LINE/Tad1	CATGGCATACATTGTAGCATTTGGCCACATTAATGAGGGAATGTGCTTTGTTTATTATTTTCATCAGGTAGTATAGGAGTATGTCATAGGGGTGTTACAGTTGATGTCATTATCCTTATTATGTAGAATGTGCACAGAAAACTAGAGAAGATGGATGTAATGCTGCTACCAGGTGGGCCCTTCAGGCAAGCAGTGCTATATTCTAGCTAGCATGCATGCACTGCTATAGCCAATATACTGATTCAAAAAAAACAAA
98	39	1	628	628	C	LINE/Tad1	TATCACTCGACTACCCCCCCTCCCCTGCGTTCTCAACAACCACCCAGCAATCGCCAGATTTTCGAGCGGATTATTGTTCAGCGCCCCCAATTTACCTATCCGCAATGTTTTCAGCCCAGGCCCTCTCTTTTTCATCGCATTACATGGTGAAAAAGGGATCTCCGGGCCCCTGAAGAAGTCCAGCGGACAGGTCATCAACACCCCACCACACAAACAACAAAAATCATCAATATTCCGGCGGAATCTTTGTCGCGTCCGCAAACACTACTTATCCCGAAATTCCGATGCCTCCCCACTCCTCCGTTGCGGAGAAACAACCTCTCCCTCCCGACAAACCTCCCTCATGCATGCTCGCGAACAAAAAACGCGCTAGCGCAGAGCCGCACACTATGCAGGAAC…
99	40	1	3306	3306	C	LINE/Tad1	CCGGCAGTGGCAAGGGAAGTGACAAACTGGGCCGTTGATGAGGACAATGCCACTGGCTCCAACCATGAAGTCGTACGCTTCCAGGTAGACACCTTACACCCCAACCTAGACATGACCTCAACCCAGCCATGCCTCAATTGGCGAAAAACCAATTGGGCCACCTTCACCACGACCCTCCAACACCTCTCCAATGCTGCCCACTCCCGCTGGGTCCACCTCTGCCAACACCCCTCCCCAGCGAACCTTGATGAATGGGCAAATCTGCTGCACGAAGGCATAAAAACTGCCGCCGAGAAATCCAACCCCCTGCTGACCCCCACCCCTCACTCGAAAAGATGGTGGACCATGGAGCTCGAACAAACTTGGAGGGATATGTCCTGTGCCCAGAGATGATGGAAA…
100	40	3317	5642	2326	C	LINE/Tad1	CAGCGTCGCAGCCCCTGAAGAAACGTGATGTGTGCACCGATGCGATGCATATTGACTCTGATGTCAGCGACATCTCCGATGCGTCTCCCCCCCATGATAGCACCCCATCACCCACCCCTTGCAACAATGCCCAAGCTTTCACAACCCTGCCCGCCCAAAAGGTCTTCCACCCAGTCAACATCAACTTCAATTCCCCTGACCCCCTGTCCAAAAATGACCCCCAACACACTGTCAGCCACAGGAAAATCAAACCAAAACACCCCCCCGCTTCCACTGTGCACTCACTATGTTCTGGCTCTGACCCCGCCCTCCCCAAAGTCAGGATGAAATGACATGCACCGGACAATACCTTCACCCACCAGGATGACACTGCCGCCCGATTCGACCAACTCCACCACA…
101	44	389	3766	3378	C	LINE/Tad1	CCTGGCTTCCCCATTGATGGCAAGGGAAATAACAAACTGGGCCATCGACGATGGAATAGCCACAGGTTCAGACCATGAGGTCATCCGTTTTCAACTAAACTCTCTACATCCAGACCACATGGCAACCCCCCTCACAACTACTCATCTCAACTGGAACAAATCGGAGTGGGATACGTTTACCAAGGAGCTGCAGCTCCTTGCGGAGGCCAGCCACCCATACTGGACACACCTCCGCGCCAACCCCTCCGCAAGCAACCTCGACGAGTGGGCTGCCCTACTCCGCGACTCCATACAGAGTGCAGCGTCCAAGGCCATCCTGACCCTATCACCCACCTCGCGCTCGAAACGGTGGTGGAATACGGAAATCCGCCACACCCGTTGTGAAATGACCACTGCCAG…
102	44	3767	6188	2422	C	LINE/Tad1	AGAAACGCGCTAACACAGAGCCGCAAGCGCCTGACGCGTCTGATATGGAAATGCATGTAGACACATGCTCTGACATCAGCGAGGACTTTAGCGATGACAATGCATCTTCCTGCGCAGACTCCCCCATGCCTGCCACCTGCAACAATGCCAACACCACTCCCAAGACCCCCCATATGAAGAAAATCCTACCTGACATGAACTGCGACACCCCCGACCCTATCACCAACAACAACCCCCAATATACCATCCACAACACTGCCGGCAAAAATAACAAACACCAAGCCGCCTCCTCCACCCACTCCATGACACACATTGCCGCCGATTGCACTCCTGTTCCATCCGGAGTCAACCGCATCCACCGCATTGCTGACACCTCCCCCATTGACTATTCCCCATTGA…
103	46	261	3571	3311	C	LINE/Tad1	CCCCTGCCATGACAAATGAAGTTCAAAACTGGTGTGTTGATGAAGAGGCAGCAGCAGGCTCTGACCATGAGGTGATCCGCTTCCAGGTATGCTCGCAATACCCAGATGTTGAATATGTAAATGTACCACCACAATTGAACTGGAAGCACACCAATTGGGACGAGTTCGCCAGCACCCTCCTCTGCCTCATGAACCAACTATCCCTCAGGTGTTGGACACTCCAACTGAACCCGACCCCACCTAACCTCGACGAATGGGCAGTATCTCTCCAATCTGCCATTAAACAGGCAGCTCATGACTCCACCCCAATGGTCAAACACTCCCCCCACTTGAAGAGATGGTGGACTCAGGAGCTTCGTGATATGAAGAAAGCAATGACACAAGCTCGGAAGAGATGGA…
104	46	3580	5090	1511	C	LINE/Tad1	AAAAATCCCCCCAAAGTTCAACCCCCCTGCCCCATGAGCGTAATCGTCGCGTGCCGTGACCCTGAAAACCTGACGGATGACATCACAGTCCAGGTAGGAAACATGGTCAACAGAGCTCTACGTGAAGCAGAGGCACCAGAAACCATCGCGGTGGTGACTGTATGCAAGAACCCCAGTGGCAACCACATACTCACTTTCCCCCTGAACACCACCCAAAACGAAATTACCCAGTTCATCCCCATCATGCACGAAGCTGCACAGTCAGTGCACATGAGTCTACAATGCCCACGAGTGGCCGAAAAATGTCACAAACTGATGGTCCACAGTATCCCCCTAGATGCCTACCCTGATACCCCTGAAGGCATGACTGCCTTACAGCATGAAATTGAATGCAATAAT…
105	47	34	726	693	+	LINE/Tad1	TTAACAAATGGGTACTCCCGGACGATGACATCAAAGAAACAGTGCAACCAACATCTGCCCCATGGGACACACCCCCCATAATGGTAGACATCTCTCCCCTACACAAAGACGAGGCCGCCACTGTGCACCTGTCCCTCCTCCGACACCTCTGCCAGAACCCCTGTAATGTCGTTGCATACACCGACAAGTCCCAACTGTCCAACAACACTGGAGCTGGGTACTACATCCCTTATTACCTCCCCCGACCTGTATGCACAATCATCCCCATGGGTAATACCTGCGAGGTATTCGATGCAGAACTAAGAGCCATCCACAAATGCCTTTCATCATGCCGGAAATACATCACTCAACACCACCTCTGCCACTGCTCAGTACACATCTGCACGGACAACCAATCCA…
106	47	744	3516	2773	+	LINE/Tad1	CACACAGCAACCGCTGACCCCCCCTGCATTTTTTAACAACAACCTCAAATTTCCCCACTCTGCCGACGGAAATCGCCTTATCGCACACTGTTTACCCCGAATCCTGAATTCCAGGCCCGAATTCCTGTTTACCGTTGAGTTTCAGTGGAAAAACGCGATTCCGGGACCTCCGGACTGGTCAACAGGCCTTTCCATCAACGCCGCCCCACCTCCCGCCCTCCGGTCATCAAACAAACCTCATTTTCGGTTTCGGCATACCGAAAACCCCCCCTCTCCAAATTCCCCTATAGCCAGCAGCACTGGTTGTGGTGAACCCCAAAATTTCCCTCCTTTCAGACCCCACTTGCTTTGTGAAAATTTTCTTTTCTCACTTAACAACAGCCGGATCACGTGATCCTT…
107	47	3525	6799	3275	+	LINE/Tad1	CGCCCCATATGGCGGAGGAAACAGTTAACTGGGCAATTGACGATGACAACGCCACGGGGTCTGACCATGAGGTCATACGCTTCGAGGTACACACAACCCACCCAGATGCTGAAACAACTCCCCCGACAAACCGACTGAACTGGAAAAAGACAGATTGGGAGCTGTTCACTGAAACCCTCCGTACCTCTTGCTCAGCCCTCACACCGACCTGGACACACTATCGCAACCACCCCACCACGGCCAACCTTGATGCGTGGATGGAGTCAATACGGGATGTCATCCTTGATGCCGCAACGACGTCCACCCCCATACTACAAGTGACCCCCCAATCGAAACGATGGTGGACCCCAGAAGTCACCGCGGCAAGAAAGACAATGACCAAAGCGAGACGTAAGTGGA…
108	47	7332	8528	1197	+	LINE/Tad1	TACATCACACACCGTAATCTCCAGCACCAGCAGATCCACCTGTTTACTGACACTCAATCGGCAATCCCCCATGCTGCCCATCTTGGACAAGGCCCAGGCCAAGATACCACCTGAGAAATCCATGACCTTGCCAGCTCCCTCCAAGACAACAACATCATGGTCACCATCCACTGGGTGCCAGGAGACAAAGACATCCCCGGCAATGAGAAAGCCAACCGCTTAGCCAAACAAGTGACCTCGCAACCACCCTGAACCACAATCCCACTTTCCCTATCATGGCTCTGTAGAAAAATCCATGAACCACACTCAACCAACTGGCTCTCCTGGTACAACGACTCCCTGGAGCCAAAGGCATATGCTGCACCACATCGGACAAACCTCGACATAGCCTACACAACC…
109	47	8770	9169	400	C	LINE/Tad1	AAGACACACAGGGGACGAGGGGAAGAAGGAGAGGGAGTCATGGAGGTGAGGGACATAGGGAGAAGTGCAGGAGTAGAAGGAGTAGTGGAGAAGGGAGTGAGGAGAGACAGGGGGGCAGTGGCCTGGCGGAGTTATCTTTTTCTTTTCTTTTCTGTTATGTTTTGGTTTGTGGAGGAAATAACCATGGGAAAACGGCTAAAAATGGGTGGGGAAGGGTGGAGGATAGAGGGGAACGACCTGGCGTGGTGGCCCCTGAGCGCACAGGGCTCGTGGAACTGACGGCGCAAGATGGATTAAGACCCAACAAGATGGGAGACTACACTGCCAAACACTCATGACAGCTCTGGGGCTTACCCAGTGGGGACCTGGCATCACACCCAGGTCCTTAACATTGTATTTA
110	47	9460	9862	403	C	LINE/Tad1	AGAAGAGACACAGGGGACAAGGGGAAGAAGGAGAGGGAGTCATGGAGGTGAGGGACATAGGGAGAAGTGCAGGAGTAGAAGGAGTAGCGGAGAAGTGAGAGATGAGAGGCGGGGGGGGCGGTGGCCCGGCGGAGTTATCTTTTTCTTTTCTTTTCTGTGATGTCTTGGTATGTGGTGGTAATAAAGGCGGGAAAATGGCTAAAAATGGGTGGGGAAGGGTAGAGGATAGGGGGGAACAACCTGGCGTGGTGGCCCCTGAGTGCACAGGGCTCCTGGAACTGACGACGCGAGATGGATTAAGACCCAACAACAGGGGAGACTGTACTCCCAAACCCTCATAACAGCTCTGGGGCTTACCCAGTGGGGACATGGCATCATGCCCAGGTCCTTAACATTGTA…
111	48	112	1700	1589	C	LINE/Tad1	CTCCCCAAACCTTGGACCGGCCCACCAGCTTCAAAGGCTCTCTTCAAACCTGCCCCCCAACCGAAGAAACAGGCCCCCGAGAACCCCCTGAGAAAAGCCCACTCACGACCCCAGGAACTTGTTATCCTGTGCTCTGACCTGAGCACCCTCCCTGACGCTGCGAAGGCAGTGATCGGAAATGCCATTAATGAAGCCCTCCGCTCGGTGAATGCCCCTGACCACATCGGGATCCTCATGGTCCGCAAGAACATAGCTGGTAACATCCTTCTAACTCCCCGCCCCGAAACACCTATCCCCGAGCTCCTCGCCCACCTCCCCCTCCTGCAACAGACTGTCCAAGCCATTCACCCCTCGTTGCAAGCTCCTCGTGCTACCGAAAAGTGGCACAAGCTTGCCATT…
112	50	1	1326	1326	C	LINE/Tad1	CCCCCCTGCATTTCAACAACCATGCCAAATCGGAATATTTTATCACAGATTACTGTTTGGCAGACCCGAATTACCTATTCGCAGCATTTCCTGACCAGGCTTTCTCTTGTTTATTGAGTTTTCAACGAAAAAGTGTTTTCAGGCCCCTGAGAAAAGCCCCACGAACCCGGTTCCATCAATACCGCCCCCCACGCACATCAAAAATCATCATTGTAATCGCGGATTCCTTGTCGCTACTGCAAAAATACCTTATTCCGAAACTCTGATGCCTCCCCGATCCTCCACTGTTGAGAAACAGCCCCTCCCCCCCGACAAAGCACCCCCTGGGGCGCTCGTGACAAAGAAACATGCTAATGTGGAGCCACAAAGGCCCCACACATCCGATGCAGAAATGCACAT…
113	50	2416	2772	357	C	LINE/Tad1	GAAGAGGGGCAAGGCAGGGAGACGAGGAGCAGGGAGTGGCAAGTAAGAGTGGCCAGAAGGGCACTGAAAGGGGAGAGAAGGGAGGAGGCGAGGGGCGCAGGTGGCTAGGAGGGGTTATCTGATTCTTGTTGTTTGGGAGGAAATAAAGGCTGAAAAATGGTTAAAAAAGGAAGGGGAAGGGTGGAGGAAATGGGGGAACGACCCAGCGAGGTGGCCTCCGAGTGCACAGGGCTCCTGGAACAGATGATGCGAGATGGATTATGAACCAAACAAGACTTGGGGGACTACAACCCCACACATGAAGACTGCTCTGGGGCATGTCCCAGTGGGGACCTGGGGTAACAGCCAGGCCCTCAA
114	50	4772	8142	3371	C	LINE/Tad1	GCTCCAGTGATAGCCAGGGAGGTGACGACCTGGGCCGTTGACGATGACATCGCCACTGGCTCAGAGTGTCACGAGGTCATTCGCTTTCAATTAGACTCCCTCCAGCCTGACCTTGACACCACATCCACCACCCCCTGCCTGAACTGGCACAAGGCAGACTGGGCAGTCTTCACAGACACCCTACAATGGCTGTCTGACACCACCTACCCCCGCTGGACCCATCTCAGAGCCAACCCCACTGCACGACACTTAGACGAATGGGCAATCCTTCTCCGTGACGCTATTCAATCTGCAGCCAAAGCCGCCACACCGGTGTCGGTCCTCATGTCCCGCTCGAAGAGATGGTGGAGAGCGGAACTGGACCAAACCCGCAAGGCTATGACCAGCGCCTTTAGACGC…
115	50	8151	9567	1417	C	LINE/Tad1	TTGGAATAGCCATCAACGCAGCCCTCCGTAAAGCCAAGGTTCCCGATACCATGGCCATCATGAAGATCAGAAAGAATATCTCCGGCAATCTCCTTCTCACCCCCTCCTCCCACACTCCTGCATCCGACCTCCTCGCCTACCTCCCCATCATTCATGAAGCAGCCCGCTCCATAAACTCATCCCTCCTAACCCCTAGACTCAATGAGAAATGGTACAAGCTGGCCATCCACGGCATACCTATCAATCACTTCCCCAATGATGCCGCGGGGATGGAGTGCCTCCAAAAGGACATCGAAGTCAACCACCCCGTCCACCTCACCCAACCCACCAGATACATCTCCCACCCCGACAAATGCACCGGTAAGTTGGCGTCCAGTGTGATGATAGCACTGCGCTCAG…
116	50	9573	10437	865	C	LINE/Tad1	CCCCCCCCCCCACGCATTGTCAACAACCACCTGGTAACCGCGAGATTTTCGAGCGGATTTTTGTTCAGCACCCCCAATTTACCTTTCCGCAACATTTTCAGTCCAGGCCATCTCTTTTTCAATGTGTTACACGGTGAAAAGGAGATCTCTGGGCCCCTGAAAAAGTCCAGCGGCATGGTCATCAAAACCCCCCCCCCACAACCACCAAAAACCATCGATTTTCTGGCGGAATCCTTGTCGCACCCGCAAACACTACCTCTCCCGACATTCCGATGCCTCCCTGCTCCTCCATTGTGGAGAAACACCCTCTCCATCCCCACAAACCACCCACACACGACCTGGCTACCAGCAAACATGCTAGCGCAGAGCCGCACGACATGCAGGCATGTGATGCGAATG…
117	51	15783	16207	425	+	LINE/Tad1	ATTCTTATTCGGAAGCCCCAAATTACCTACCCGACACCTCCTAAGACCAGGCCCTCTCTTTTTCATCGTGCAAATGAGGAGAAGGAGAATCCGGGCCCCTGAAGAAGCCCTCGGAGCAGGAGACACCACCCCCACCAACCCCGCACAACAGAACATCTCGATTTTCCAGTCATTCCCATATCGCAAGACCAACACAACCTTATCCCGAAAACCCGATGGCACCCTGCGCCTCCACCGGCAAGAAACGCCCCATACCCCCCGACAAAAAGCCCCCCTTCTACCTCACCTTGAGCCAAGATGCTAGCGCAGAGCCGCATGCAATGCAGGAATGCGACGCGCTGAACGACACCATGAACGTCGACTGTGACGTCAGCGACAACGAAACTGCATCTCCCTCCC…
118	51	16354	16641	288	+	LINE/Tad1	CAACGAAAAATGGCACAAGGTAGCTGTTCATGGAGTACCCACCGATGCATTCCCAGACTCCCCTGAGGGCATGGAACTCCTGCAATGTGAAATAGAATGCAACCACCCCGTTAAACTTGCCCAGCCCCCACGATACATCTCCCATCCAGACAAACATGTCGGCAAGGCAGCCTCCAGCATGATGATTGCCCTGAAGACCGCTGAGGACACACAGATGCTTAAGAGAACAAAGGTTGTCGTCTGTTATGAACTCAGAAAAGTCACGGACTATCACTCGTCCAGATCCAC
119	51	16642	19280	2639	+	LINE/Tad1	AAGGCACCCGGCCCAGACGGTATAACTTTTGCATGCCTACGCACAGCATACGAAGCTATCCCAGAACACATCTCCCAGCTCTACGCCACTCTCGGAACAGTTGGCTATCAACCTCAAAGCTGGAGGGAAGCAACGACTGTCATCATCCCCAAACCCAACAAGCCGGATTACAGCTCGATCAAGGCTTACCGCCCGATTGCATTGTTAAACTGCTTAGGCAAAGTGCCGGAAAAACTCATGGCTACGAGACTAGGCCAATTAGCCAAAAAGCATGACATACTCCATGACGACCAGATTGGCGGACACCCCAAGCGCTCGGCAATCGACGCGGCGATGGCACAAACGCACGATATCGAGACCAATGCAAAAAATAAACTCGTGACGTCACCTCTGTTCCTG…
120	53	12863	14639	1777	+	LINE/Tad1	GGCTGGTCGGCATGCTCAGCACAGTGAACCGATGGGTTCTCCCTGACGACGTCATCGAGGACACCACCCACCCAGTCACCATGCTATGGACCCCTGACCCCATCACCACCGACATACCCCCAATACCCAAAGAAACTGCAGCAGCCGAGCACCTTACCCTTCTTCACTGACTACGCCACTGAAACATGAACATCATCGCCTACAGGGATGGTTCCCAACTGGAATGAAACACAGGCGCAGGTTACTACATCTCCAACGGCCTACCAAGAGAAGTCCACCCCATCATCCCCATGGGAAACACCTCCAAGGTGTTCGACGCCGAACTGCACACCATACACGAATGCCTACTCACCTGCCACAAACACATCACCCTCAACCAGCTCCAAAACTGCTCCCTCC…
121	53	14709	16316	1608	+	LINE/Tad1	TCCCCAATGCCCCCCTCACACCACCCAAACACACCCCGAAGACCCCCACCCCCAAGAAGACCCTCGTGCCCAAGAAAACTCCCGCCCCCTGCCAGGACATCGTCATCCCCTGCCCCGACCCCTGTGTACTTCCGGACAGAGAAAAGATCCAAATCGGACTGGCAATGAATGTGGCCCTATGTAAGGCAAACATTCCCATGAACATCGCTATCATGATGGTTCGTAAGAACATCTCTGGTAATCTCCTCCTAACCCCATCCCCCGATACCCCTGTCTCCAACCTTCTTCCCCATCTCCCCCTCATCCACGAACCTGCCCATTCCATGCACCCCTCCCTCCTAACCCCCAGGATGAACGAAAAATGGCACAAAGTTGCCGTCCATGGGATACCCACCGAAC…
122	53	16327	16906	580	+	LINE/Tad1	CCGGCAGTGGCAAGGGAAGTGACAAACTGGGCCATCAATGAGGACAATGCCACCAGCTCCGACCATGGAGTTGTACGCTTCAAGGTAGACACCTTACACCCCGACCTAGACACAACCTCAACACAGCCATGCCTCAATTGGCAAAAAACCAATTGGGCCACCTTCACCACGACCCTCCAACACCTCTCCAATGCTGCCCACTCCCGCTGGGTCCACCTCTGCCAACACCCCTCCCCAGCGAAACTTGATGAATGGGCAAATCTGCTGCATGAAGCCATAAAAACCGCTGGCAAGAAATCCACCCCCCGGCTGACCCCCACCCCTTGCTCGAAAAGATGGTGGACCATGGAGCTCGAACAAACTCGGAGGGATATGTCCAGTGCCTGGAGATGATGGAAA…
123	59	2418	3034	617	C	LINE/Tad1	TACTGGAAAACCCGATGCTTAAGTGCAGAAGCTGAACTAACACGACACCAGAACCCAATCCCCACCTCCCCCCCACCACCCCAAGCCCCGACAGCCTAACCATGGACAAGCAATACCACCACTCGAGACCTATTCCAGAACACTCATTCCCCCACCCCTGCTGCCCATCCTAAAGGCCCTGCCCACAAAAGAAACCTACCCCCCAAAACTGCAATCCCATACCCCCACGCAATCACTGTCCCTTGCCTGCACCCAGAGAACCTGACAGATGACATAAAGGTACACATAGGTACTGCAGTGAACACTGCCCTGAAAGTGGCCACTGTGCCAGACCACATGTCTGTCATCATGGTCTGCATGAACATGTCTGGCAACATCATGCTGACTATGTTCCCTGCC…
124	64	99	2123	2025	C	LINE/Tad1	CCTGCCCGCCTGTGTTCTCAACAACCATGCTGAAATTACCAGATTCTCGAGTGAAATGACATTCAGCATGCTCAATTTGCCTTACTGCATTGATTTCAGATCAGGCTCCCTCTTTTCCAGCATGTTACATGGTCAAACAGGGATTCCCGGGCCCCTGAAAGAGACCTGCAGTGCGGCCATCAACACCCCACCCCACCACCACCAAAAACCATCCTTTTTCTGGCAAATTCTTTGTTGCGCCCGCAAAAACAGACTATCCCGAAACCCCCATGTCTCCCTGCCCTCCCGTGGTGGAGAAAACCCCCCCTGTCTGGAGCAAAACCTCCCCCTCGCGACACTGCAACAGAAAAACACACTAGCACAGAGCCGCAGCCCCTGCAGAAATGGAATGCATGCACC…
125	64	3999	4368	370	+	LINE/Tad1	GGCGAGGGAGCAGTGGAGGGGGGTGCATGGGGGAGAGCAGAGGAGTTGAGGATGCAGACGGAGAGAGGGGAGAGAGGAGAGGCAGGGGGGGAGGTGGCCCGGAGGAGTTACTCTTTTTTGGTTCTGTTTTTACTTTGCGGAGGAAATGAAGGTGGAATATGACTTAAAAATGGGAGGGGAAGGGTGGAGGAAATGGGAGATTCACCTGGCGAGGTGTCCTCCGAGCACACAGGGCTCCTTGGATCTGATGACGCTAGATGAAAAACTGCATGGCGAGACTTGGGAGAGTACACTCCCACCCACATTAACTGCTCTGGGGCTTACCCAGTGGGCACCTGGCATCACCCGCAGGTCCTTAACATTGTATTTA
126	65	2	1340	1339	C	LINE/Tad1	GCAAAGACATGACCTGGGGCAGGAGGAGATGGAAACAGACCTGCCTTCCCCAACACCATGCCAAATACACACAGTCCCGGAAAGCTCACTACAGGAAAGTCCGACATGCGAAGGACTCTATGTGGAAGGAATACTTAGCCGCGGCGGCAGGACCAGACATATGGACAGCCTTCCAATATACCAACCCGCACTGCGCTCAATTGACACCGCCGATTAAGACACAGGTAGGAGGAATGGAGAAGTTATGCATCGACTTCGAAAGTAAGGTAGAGGCCTTTCAAGCATTATTCCTGCCCCCCCCAGCTGCCCCCCCCACACGCACCTCACGACCCAACCCCCAACTCCCCTGGAAAACATTCAACCCCAAAGAAATTCGTACCGCCATCACAACATCCTTGC…
127	73	1	2604	2604	C	LINE/Tad1	TATCACTTGACTACCGCCTCCCCCTGCACTGTCAATAACCACCTGGCAATCGCCAGATTTTCGAGCGGATTATTGTTCAGCGCCCCCAATTTACCTTTCCGCAACATTTTCAGTCCAGGCCATCTCTTTTTCAACGTGTTACATGGTGAAAAGGAGATCTCCGGGCCCCTGAAAAAGGCCAGCAGCACGGTCATCAAAACACCCCCCCATAACCACCAAAAATCATCGATTTTCCGGCGGAATCCTTGTCGCACCCGCAAACACTACCTATCCCAACATTCCGATGCCTCCCCGCTCCTCCGTTGTGGAGAAACACCCTCTCCCTCCCGACAAACCACCCACACACGATTACGCTACCAGCAAACACGGTAACGCAGAGCCGCAAGACATGCATGCACG…
128	73	2639	3104	466	C	LINE/Tad1	ACTTTGGCTCTGAGATATGGTGGACAGGCCAAAAAAGTCTTGCCAACCTCATCCAAACTGAACAAAACTCTGCCCTCCTTAGAATCCTAAACGCATTCCACTCAACACCGATAATCGCCCTCCACAATGAAGCCGCAATACCCCCCGTTTCGGTCCGCTTGCAACACCGAACCTGAAAATACGTCCTGCGTCTCCTCTCCCTCCCCCCTCACCACCCTGTTGTGAAACGCTGCCCCTCCTCCTTCCCCGTGCCCCTACACCTCCACACCTCCATATGCAACCCCTACGAATACGACCACCCCTGGCAGTCCCCCGGTGACACCCCGTCCCGCCTCATCAGCATGCTACGATCAGTCGGCAGATGGGTGCTACCCGATGATGATATCGAGAATACAGCTC…
129	75	1	1099	1099	C	LINE/Tad1	CTTGGTCGCCCCATTGATGGCAAGGGAAGTATCAAACTGGGCAATCGACGACGGGATCGCCACGGGATCGGACCACGAAGTAGTCCGCTTCCAACTGGACTCCCTCCACCCAGATCATCCAGCCTCGCCTACCACTATGCGCCTGAATTGGCGCAAAACAAATTGGGAATCCTTCGTGACAGAGCTACAACACCTCTCCGAGACAGCCTATCCCCGCTGGACCTACTTCCGCGCAAACCTGTCCGCCCGCAACCTTGACGAATGGGCAATCCTCCTCCGTGACTGCATACAGAAAGCAGCCGCCACAGCAACACCCACCTTAACCCCCACGCCGTGATCGAAGAGATGGTGGACACAGGAAGTAAGCAGGACGCGGAAGGCGATGACAGGCGCCCGAAA…
130	75	1100	1548	449	C	LINE/Tad1	ATTACCCACCCTGATTTCCTTCTCTTACTCCCGCCCCAAGGCCAACGCAAAGTAAACCGCACGGCCGCTTATGTCTCCCAACTTAACCCCCACATCCGTGTCACTCCCAGGCTGGATGTCAGTGGAGACCCCGACCTCCAAGTGCTCGAAGTCAGCACCAACCTTATACCTGCCTTTTATCTCCTAAATATCTATAACGAACATGACCCCCTAACAAGATCATACACTATCCCTCGCTCCTTAACATCCCTCACCCTCCCCCAACACTGCATTATCACAGGGGACCTCAATGCCCATCACCCCTTGTGGAACTCCCAGATGCGGAGAACAGCGCGAGCCGATGAGCTCGTGGAACTTATAGAAGACCACCAATGGCAATTGGTAAACGTGCCAGATGTC…
131	75	1846	3141	1296	C	LINE/Tad1	TGTGGAGAAACCACTGCTCCCTCCCAATAAACCTCCCTCACGCGCGCTCGCGAACAAAAAACGCGCTAGCGCCGTGCCGCACGCCATGCAGGGATGCAACGCGATTGACGATGAATTGCACATTGACATGTGCTCTGACGTCAGCAACAGCGACAACAACAACGACACATCTCCCTGTGCCAACTCCCCCACACCCGCCCCATGCAAACCGACCACCACCTACCCAGCCATTCCCCACAACAGGAAAACCATCACCGTGAACGAGTACGGCTTAACCCCCGACCAACGCAGCAAAAACAACCCCGAATACACCATCCAACACTCCACCGGCACCAAAAAGAACCCCTCCAGTACCCTCCCCAAGAAATGCCCCGCTGCCTCCACCACACACTCCATTCT…
132	75	3176	5861	2686	+	LINE/Tad1	CCCCCCCCCCCCTGCGTTCTCGACAACCACGCTGAAATCACGAGATTTTCGAGTGAAATCACGTTCAGCACGCTCAATTTGCCTTACTGCATTGATTTCAGATCAGGCTCCCTCTTTTTCAGGGTGTTACACGGTGAAAAAGGGATTCCCAGGCCCCTGAAAGAGACCCGCAGTACGGCCATCAACGCCCCATCCCACAACCACCAAAAACCATCTTTTTTCCGGCGGAATCTTTGTCGCGCCCGCAAAAACAGACTATCCCGAAACCCCCATGTCTCCCCGCCCTCCCGCGGTGGAGAAAACCCCCCCCTCCGGAGCAAAACCTCCCCCTCGCAACACTGCAGCAGAAAAACGCGCTAGCGCAGAGCCGCAGCCCCTGCAGCAACGCGACGCGCGCAC…
133	75	5866	9340	3475	+	LINE/Tad1	GCGGCGCCGGCAGTGGCAAGGGAAGTGACAAACTGGGCCGTCGATGAGGACAATGCCACCGGCTCCGACCACGAAGTCGTACGCTTCCAGGTAAACACCTTACACCCCGACCTAGACACGACCTCCACCCAGCCATGCCTCAATTGGCGAAAAACCGATTGGGCCACCTTCACCACGACCCTCCAACACCTCTCCAATGCCGCCCGCCCCCACTGGACCCACCTCCGCCAACACCCCTCCCCAGCGAACCTTGACAAATGGGCAAATCTGCTGCGCGAAGTCATAAAAACCGCCGCCGAGAAATCCACCCCCCTGCTGACCCCCACCCCTCGCTCGAAAAGATGGTGGACCATGGAGCTCAAACAAACTCGGAGGGACATGTCCCATGCCCGGAGACAA…
134	76	18	709	692	C	LINE/Tad1	GAGAGGACAACACCTGGCAGCTAGAAGCTGCAGCACACACCATCTTCAGGTGGGCTGAAAACAGTGCCATAGCTCTTGATGATGCCAAGCCTGAAATGCTTCATTTCCACAAAACCCGCAAAGACACAAACTCCACAACAACAAACATATGCCTACCGAATGGCACTGAAGTCACCCCAGGCACAAGAGGAGGAAAGCAGGATATGGTCTGGTGGATAGGGATTTACTTTGATAGAAAATTGTCTTTTGTGCATCATGTACATAACAAGCTGACAGCCCCCTCCAGATCATTCATCACCCTGTGCAGCCTCGTATGCTTTGAAACATGTCTGTCCCCCTCCTCCACTCGCTTACTTTACTGTGCATGTGTGCAGACTAGGTCCGATTTCAGTGCCGAGA…
135	76	773	1106	334	C	LINE/Tad1	AGAAAGTGCACGGAGGCACACAGGGGACGAAAGGGATGGGGAGAGAGGAGTGCAGAGAGAGGACAAGGTCAGTCAGGAGGCATTTATACTTTCTTATGTTGTGGAGGAAACAAAGGTGGAAAAATGGCTAAAAATAGGAGGGGAAGAGAGGAGGAAAGGGAGGAACGACCCAGCGAGGTGGCCTCTGAGCACACAGGGCTCTTGGACTAGACGATGCACAGACAAACCTGACTGCAGGGACTTGGGGGGCTACACCCCCAAACAAGAAACATGCTCTGGGGCAGATCCCAGTGGGAATCTGGGGTATCAGCCAGACTCCTAAATGTTGTATATA
136	76	1335	3591	2257	+	LINE/Tad1	ACCACACAGCAACCGCTGACCCCCCCTGCAGTTTTCAACAACAACCTCAAATTTCCCAGCACTGCCGACGGAAATCGCCTTAGCGCACACTGTTTACCCCGAATCCCGAATTCCAGGCCCGAATTCCTGTTTACCGTTGAGGTTCAGCAGAAAAACCCAATTCCGGGACCTCCAGACCAGTGAACAGGCCTTTCCATCAACGCCGCCCCACATCCCGCCCTCCGGTCATCAAACAAACCTTATTTTCGGTTTCGGCAGACCGAAATCCCCCACCCCCCAAATTCCACTATCGCCAGCAGCACTGGTTGTGGTGAACCCCCAAATTTCCCTCCTTTCGGACCCCCGTTCTTCACAAAAATTTTTTCTCGCTTAACAAGAGCCTCATCACATGATCCTTCG…
137	78	4	2329	2326	+	LINE/Tad1	CACCAAAGACAAACTACTGATGTCAGCGCTCTTCCTCAACATCTGAGGCGCATTCAACAACGTTTCCTCAGCATGCCTCCTCCACACAATGCATCAATTAGGCTGCCCGCAACAAGTCCTATCATGGGGAGAATCCTTTCTCTCTGGCCGCACAACGGATCTCTCCTTCGATGGCCGCACCGACATACAATGCCCGATCTCCACCGGGAATTCCCCAAGGCTCACCGGCGTCCCCTGTTCTCTTCCTGCTCCACCTACGCCCCCTCTTCGACGAACTAAACTCCGCCCACCCCCAGATATGGACGCCCAGCTACATTGACGACATAGCGCTGGTGGCCCATGGCCAAACAAGGGAGGCAAATGCAAGACAGCTGGAGGTGGCAGCCTGCACCGCTTTTC…
138	79	44	3447	3404	C	LINE/Tad1	TAGCGGCGCCGGCAGTGGTGAGGGAAGTGACGGGCTGGGCCATTGACGACGGGCAAGCGACGGGCTCCGACCACGAAGTCCTGCGCTTCCGAGTCGTCTCCGTACACCCTGACCTGGACAGAACACCTGACACGCCCTGCCTGAACTGGCGCAAAACGAACTGGGAGACATTTGCCTCCACCTTACAAGACCTCACCAACACGACACACCCCCAATGGACTCACCTCAGCTCCCACCCCTCCGCCCACAACCTCGACGCATGGGCAGCCCTGCTTCGCGACCACATCCAACAAGCCGCCCGCGACGCCACCCCCCCGACAACACCCTCCCCCAGGTCAAAACGCTGGTGGACAAAAGAGCTGGGAGAGACAAGAATGGAGATGGCAAAGGCCAGGAAGA…
139	79	3450	4659	1210	C	LINE/Tad1	CGACATCCCCACAGAATACTTCCCCGATACTGAAGCCGGAATGGAGCTCTTGCAAAAAGAGATCGAGAGTAACCACCCTGTGAACCTAGCCCAACCACCCCGTTACATATCACACCCCAACAAAAGGGTAGGCAAAGCCGCCTCCAGCGTTATGATCGCCCTGAGGTCGAACGAGGAATTCAACGCCTTGAAATGCTCCAAGGTCGCGGTACTCTTCGAACAGCGCCGTGTGACCGAATTCTTCTCCGCACGCTCAGTCGACCAATGCTGTAGATGCCAAAGATTCGGACATCATCACGCAACCTGCCCCACCAACAATGGATCCACTTGCGCCATCTGCACCGACCCACACCCCATGGACTACCACCAATGCGCCACCTGCCCAACTATCAAAGGCCG…
140	79	4682	5138	457	+	LINE/Tad1	TATCACTCGACTACCGCCTCCCCCTGCGCTCTCAATAACCACCCGGCAATCACCAGATTTTCGAGCGGATTATTGTTCAGTGCCCCCAATTTACCTTTCCGCAACATTTTCAGTCCAGGCCATCTCTTTTTCAACGTGTTACACGGTGAAAAGGAGATCTCCGGGCCCCTGAAAAAGTCCGGCGGCACGGTCATCAAAACCCCCCCCCACAACCACCAAAAATCATCGATTTTCCGGCGGAATCCTTGTTGCACCCGCAAACACTACCTATCCCGACATTCCGATGCCTCCCCGCTCCTCCGTTGTGGAGAAACACCCTCTCCCTCCCGACAAAGCGCCCACACGCGACCTCGCTACCAGCAAACACGCTCATGCAGAGCCGCAAGAAATGCATGCACG…
141	85	67	3946	3880	C	LINE/Tad1	ACTTGCCGCCCCGGCGGTTGCCAGGGAAGTATCCAACTGGGCAATTGATGAGGGGAACCCCACCGGCTCTGACCATGAAGTTGTCGTCTTCCAGATATCCTCCCTACACCCCGACGCGGATCACGTCACACCAGAGCCCTGCCTTAACTGGCGCAAAACAAACTGGGACACGTTCACGTCCACCCTCCGTGAACTCTCCGCCAATAACCAACCCCTTTGGGGCACTGTGCGCGCGAACCCCACCGAATGCCAGCTTGACAACTGGGCAGTCCTCCTCCGCAATATTATCACCACTGTGGCAGCACAGTCTACCCCTGCACTCGTCCTCTCCGCACGATCAAAACGATGGTGGTCCCCAGAGGTGGAACACGCGAGAGCGGCCATGACCAGCGCTCGCCG…
142	85	3947	4812	866	C	LINE/Tad1	CCTCGCCTGCCCGTTACACACGCGGGCACCCCACTGACCAAGATAGCTGTGAACAGTGTCCCACTCGCCGCGGCCGCTCATGCATCCACACCGAGCACAAATGCACCAACTGCGTCGTGGCCAGCCGCCCCGACACTGCCCATGCTGCCTTCAACGGCCACTTGCCCCACAAGGCATCCACCCTGAGAGAAGAATGGCAGCATACCAGACCTGCTCCCCGCTCAACAATGCCCGCCCCCGCCGACACCTCCATGAGCACTCATGCATAGTTACAACCCTACTGCAGCTCACATCCGCATCACATCCCACAATGTGAACTGAAGCACAACGTCCCTCAACACCCTGCTAAACATGGCAGGTAAAACAAATGACATAATCCTGGTCCAAGAAGTAAACATC…
143	86	1020	1648	629	+	LINE/Tad1	CAACATTTTGCACACCACCAACGGAGTTAAAGAACTTGCCGCCATGATCTCAGATACGAAAAATGCGACACCAGAATGGGCCCATACAACGTTAAGTGAGTACCCCGCGGAGAGGGACACCCCCGTCTCGCTAATCACAGGCTGGGGCACGCTGCTGGACCAGACGGAGGAGCACGATACCCTCCCAGCTAGTTAACAAGTAAAAAAAAAAATATGAAGTAAAAAAAAAAAACAATATAGAAAACATTGAAGGCAACTAAGGGGATGACAAGAGTTAATTGTGTTTCGTGTTTCTACTTGCTTTACTTGCTTTTGGCAGAGAACAGAGAGGGACAAAGGACTGAGGAGGGAGAAGAGACGAACTTGGCGTAGAGATGATCCTTTTCTTTTGTTCAGCGG…
144	93	269	1927	1659	+	LINE/Tad1	ATTCCCCCCATCGCAGTCCGCCTCCAACGCCGCAACCGCAAATACGTTCTCCGCCTCCTCTCCCTTCCCCCTTCCCACCCAGTAGTTACATGCTGCCCTTCCTCCTTCCCCGTGCCCAATCACTTCCGCACCTCCATATGTAACCCGTCCGAATATGACCACCCCTGGCACATTACCCAAAGAGCCCCCTCGTGCCTGGTTCGTATGCTCCGCTCCATTGGTCAGTGGATATTACCAGACGACGAAATCGAGGACACGGCACATCCAAATCCCACCCCGTGGAAAAACTCACGCTTAAGAACAAAGATATCCTCCCTCCCCAAACCCGAAGCTGCCGTCAAACACCTCTCGCTGATCCGCGACCTGAGTAATGACAAAACNNNNNNNNNNGTCGAACAC…
145	93	1991	4256	2266	+	LINE/Tad1	TGTAGAAAGCGTATCTAGCAGCAGCAGAGGGACCAGACATATGGGAAGCCTTCCATTACACAAACCCCCGCCGCGCCCAGTTGACCCCGCCAATAAGAACTCAGGTAGGAGGAATAGAGAAGTTGTGCATCGACTTCGAAAGTAAGGTCAAGGCCTTCCAGGCATTATTCCACCCCCCCCGGACGGCCCTCCGCATGCAAAAACCCCCCACCGCCCCTGAAATCCCATGGCACACCTTCAACCCCGACGAGATCCGTCACACCATTAACACCTCTTCCCCCAAAAAAGCCCCTGGCCCAGGCGCCATCACTTTCGCGTGCCTTAGGAAAGCATACGAAGCCGTCCCCAAAATCTTTAATGCCCTATACTCCAGATTAGGCGAACGAGGATACCACCTGC…
146	95	236	3014	2779	+	LINE/Tad1	CCCCCCCCCTGCATTCTCAACAACCACCCCAAAATCGCCAGATTTTCAAGCGGATTATTGTTCAGCAGCCTCAATTTACCTTTGCACAACATTTTCAGACCAGGTCCACTCTTTTTTGTCATGTTACACGGTGAAAAAGAGATCTCCGGGCCCCTGAAAAAGTGTCGTGCTCTGGTCATCAACGCCCCCCCCCCACAACAACCAAATACCATCAATTTTCCAGCGGAATCTTTGTCGTGACCACAAAAACAATCAATCCCGAAATTCCGATGCCTCCCTGTGCCCCCGTCATTGAGAAACGACCTCTCTTCCCCGACAAACTACCTACATGCATGCCCACACACAAAAGACTCGCTAGCGCAGAGCTGCAGGATATGCAGGATGCATCTGACGACGAAA…
147	95	3015	6147	3133	+	LINE/Tad1	CCTGGCAGCCCCATCAATGGCGAGGGAAGTCTCGGCTTGGGCTATCGACAACGGGTTAGCCACAGGTTTGGACCACGAAGTAATCCGTTTCCAAATAAACTCTCTTCACCCGGATCACACTCCCCCCCCGAGCAACACCTGCCTGAACTGAAAGAAGACAGATTGGGACTCCTTCGCCACAGAGCTACAACGCGTCACCGAAGTCACCCACCACCGGTGGACCCACCTCCGAGCCAACCCCTCCGCCAGCAACCTAGACAAGTGGGCCGCCCTCCTGCGAGACTCCATCCAAACAGCTGCCACAACGACAACGCCCACCCTCACCCCCACCCCCCATTCGAAACAATGGTGGACGGAGGAGGTACGCAGAACACGCAAGGAAATGACGAGCGCAAGAAT…
148	100	1	242	242	C	LINE/Tad1	GAAACCGCCTTCGACATCCTACGCACCGCCACCGCCTTCCTCCGACGCTCGACCACAGTAAGCATACACTGGGTGCCAGGACACACTGCCATCGACAGCAACGAGGAGGCAGACCGCCTCGCAAAACTGGCAACCACGCGCCCCCCCCTCACCGACACACCTATCACCCTATCCTGGCTCCATCGGCGCATCAAGGAACAACACTCCGCCGACTGGACCACATGGTACCACACCTCGCCGAA
149	100	604	3350	2747	C	LINE/Tad1	TTCCAGATATCCTCCCTCCACCCCGACGCGGAATGTGAGACTCCAGAACCCTGCCTTAACTGGCACAAAACCAACTGGGACAAATTCATGACTACCATCCGCGACCTCTCCGCCAACGCCTACCCCCAGTGGAGCACCGCGTGCACCAACCCAACCGAGCACCTCCTAGATGAGTGGGCCGTCCTCTTCCGAAACATCATCACGACTGCCGCAGCACAGTCTACACCCACACTCGTCCTCTCCCCATGATCAAAACGATGGTGGTCCCCGGAGGTGGAAGACACGAGGGCGGCTATGACCAGTGCTCGTCGTAAGTGGCAACGGACACATGCGCCCCACCACCACGAGGCATACCGTGCCCTCCGAAACAAACACTTCCGAACAGTACGTCACGCCAAA…
150	101	784	2449	1666	C	LINE/Tad1	CGGCGCTAAAAAACCACCAACTTTTTTGTGTAACCTTCCCGATTTGGAAAATTTCACAGCCCTCTCACGGCTTCATTTTTGCCCCCCCTCAATGGCCCCACAGACCACAGTGCCTGTAGGCACCACTGAGTCACTGTACCATGGTTATGTGAAGGGCTCACATAGCAAATGTCCTCCTGCTGCTCGTACAGCAGCATGAACCCATCTAGCAATCTGCCCAGCAGCGCGGCCATAGATGTCTTCTCCACCCCANNNNNNNNNNCTGGCCACCCCAACACCCCTCCTCATGAAGCTGCAGCACTTGCAGCACAGGCCACTGGAGTTCAAGTCCCCACAACCAACCCCAACCCACTTGCTTGCCACGAGAGGTAAATGACCTGCTGATGTCTCAGGGGACAC…
151	103	4723	5487	765	C	LINE/Tad1	CTTTACTGACAACTCATGTGCAATCCTATGCACCTCCCACCTCACCACCAGCCCTGGCCATGAGCTTGCCTGCATGATACATGAAACTGCCACCTCACTACATTCCCTCAGGGTGCTGGAAACACTACATTGGGTACCTGGACACACTGCCATCGCCGGTAATGATGAAGCCAACCTCCTGGCAAAAGCCACCATGGATCTACCCCCCAACACTCTGATCCTGATCTCCCTGTCCTGGCTCCAGAGACAAATCCATAAACAATATGTCGCAGACAGTGCCACATGGTACAATTCTGAACCAAACCCAAAACTTACAATGCACCTCACAGCTGCCACCTTGACCATGCATACACCTCCCTGCCATGTAAACTCTCCACAGCCATCCTCGGCCTTCACACA…
152	114	59724	59937	214	+	LINE/Tad1	CATCACCACAAGGTCAGCTGGAATAAAGAAGCGACTCGGTGGATCGGAGTTCACCTGGATCACTCATTGACGTTCGCCGCACACCGGCTTAAGGTTGTCTCAAAAGCAAGGTCGCCCGAGGGCCATCTGCGCAGTCTCATTAATAAGTTTGGAATACCCCCTGAGAGCGCTCGCAACATCCAGATGGCAGTGGTTCAGTCAACCCTGCTGTATG
153	128	55723	56417	695	C	LINE/Tad1	AAGAGCAATTCACCACAATCTCCCACCTGAATCGATACGCCAAGGAAAAGCGGACCGAAGAACAGAGACAATGGCTACAAAAAACAATTGCCCCCCGACTAGGCTACTGCTTGCCAGCAGAAACGAAATCGGATCCCACCGCCATCAAGACCACAAAGAGAATAGCCACTCGATACTACCAATTAAAGACAGGGCACGCAGTCATCGGGGTACACCTCAAACGGATAAAAACAATCCCAGACGACAGATGCTGGTGGTGCACCTTGGGTGACAGACAGAGTGTCAAACACCTGGTTAAGGAATGTAGGAAATGGCGAAAGGAACGGGAGAAAATGCAGAAAGGCATAAAAAAGCACTTATGGATCAACGAAGGCATAAAGTTCATGTTTGCGGACAGAA…
154	137	3741	4003	263	+	LINE/Tad1	CACTTCCGTGACGACAACGATAGCATGCGCCTCCTCCAAGGGGAGACCGAGCGCAGCAACCACCCGCTTTTTCTCACTCAATCCCACAGATACATGTCACACTCCAATAAACATGCTGGAAAATCCGCCTCTAGTGTCGTCATCACCGTCCGCGCCGAAGCCGAGTTGATGACCCTCAAGGGCAACAAAGTAACAGTGCTCTATGATCCACGAAAGGTGACGGAATACATCGCCTCCAGAGCTACTAAGCAATGCTGCCGGTG
155	137	84759	85295	537	C	LINE/Tad1	CTCCTATTGCACTGTCTGCGCTATTCTAAAGTCTAAAGAACAGCTAGCCGCAGCAAAGACAAGCCGCATCCCCCTTCATACGAAGATCTTCCTCTACAGCAACATCTCACACAAAGCTCTTGCGGTTCTCATCCGTAACACTTGAATAGGAACCTGCTTCGAACGGGGACTCAAAGAGGCAGAAAGAGGAGGAGTGGAAAGCGGGGAAGTCGCCAGGTGGCAGAGGAGTTGGAGGACGCAGTAGTGGAAGAAGAAGAGAGAGAACGAGAGGTTGAGGTTAAGGAGTCAAGAACGGCGGAGGCACTGGAGGAAGCATAGCAATTGCTACAGGAGATGTTTGGGGACGAGCCGGAGGAGTTGAGTAAGGAATAGCGGGTGTAAGATGATGGGTTAGAGGAG…
156	142	95433	96069	637	C	LINE/Tad1	AACTCCGCATGGGACATGGACACTTCGGCTCTTTTCTCCATCGGATGGGCTTCCGAGACCCGGACCGATGCACCTGCGTTGCCGGCCCCCGAGAGACACCTTAACACCTCCTTTTTAGCTACCCCCGGTACTCCAAGGATCGTCTGGAGGCTGCCAAATCCAGCTGAATACCCCTTCATACGAAGGCCTTCTTATACAGCGATATAGCCCATAAGGCATTGGCAAGCCTGATACGACACCAAGATTGGCACACGACTAGAAAGAGAAGAAAATGCGGCGGAGCTTGCGGGGGCAGCGATAGTGGAGGACAGAGAGGAAGTGGAATCAGATGACGAAGATGAATACGGCGAAGAGGATGGCCTAGAGCAGAGAGAGGCAGCGCTGGCGGAAGCAATGACG…
157	151	60593	62791	2199	C	LINE/Tad1	TTGCCGGAGTCATCCTAATGGACGTCAAGGCGCATTCGATCATGTATCCCGAACTCATCTCACAAAACACATGGAAGAATTAGAAATGGACCCACAACCCATCCAATGGACGGACAACTTTATTACAGGAAGAACAGTGTCACTTGTCATTAATGGCCACGAAGGAGCTATGGAACCCAGGAGCACAGGAATTCTTCAAGGATCGCCGGTATCGCCAATTCTATTCGCCATCTACATCTCCGAAATCTTCGACAAAGTGGAAGGAAACTCGGAAGGCATCTCGCTATCATTTGTGGACGACATATCATGGTTGGTAACAAGTCAGAATGCCACAGAGATCACTGAGAAACTTCAATAATGCGCCATACTATCGAAAGAATGGGCAAGTCGGAACGCAGT…
158	151	301946	303345	1400	C	LINE/Tad1	TCATAGACAATCACGCTACGCCCAGAGGATTCTCAGACATCCCGAGAAAACTAGGGGAGCGAAGGAAGTGCTATTAGCGACGGAAAACTCAGCGCTATCTAAACGACTTAAAAAGATGAGTCACGTAAACGGAGACAGGATGGAGAAACCCCACCTGGAAATGGGAAAAACGTTCATGGGAGAAATCATGCCTCACACGAACGAGTCAAAAGCCATGAAGTTTGCTGAAGAATGGACAGACCGGGAAGACACAGCCTGGACCGATGGATCCCGCTTGGAGGATGGCCGAGTCGGGTGCAGTATAGCATGGCAGGAAGAAGAGGGCTGGGTGGGCCAGACCATCCACCTCGGCACGAACAAGGAAGTCTACGACGCCGAACTCTGCCATATGGCAGGCAT…
159	152	7700	8306	607	+	LINE/Tad1	AGCTCCGTACTGGACACGGACACTTCGGTACCTTCCTCCCTAGGATGGGTTTCCGAGATAACGACTGCTGTGTCTGTGCCGATGGCCCACGAGAAACGCCCCAACATCTCCCTTTTCACCGTCCGCGATACTCAAAGGACCGCCTGGCAGCTGCCAAATCGAGCCGAATACCACTCTATACTAAGGCTTTCCTATACAGCGATATCTCGCATAAGACATTAGCCAGCCTGATTAGAGACACCAAGATCGGGGCCAGACTGGAACGGGAACAGAAAGAGGCGGGGAGGGCAGGGGCGGCGATTATAGAGGATGATGAGGACGATGACGGGGACTTGGCGGAGGGGGTGGCAGCGCGGAGGCAGCAGCGGAGATAGAGAGAAGAGACACGGCGTTGGGTGA…
160	154	102317	102863	547	C	LINE/Tad1	TTCCACTGTCCGCGCTACTCCGAAGCTCGCCTTATCGCGGCGAAGAAAAGTCGCATTCCGCTGCACACCAAGGCCTTTCTCTACAGAGACATCGCACACGAAGCACTTGCGGAGGTTATCCGCGATACTAGACTTGGCACTCGTATGAAGAGGGCCACCAAAGAAGAAGAAAGAGAAGAAATTCGGGAAGCAGAGGTTGGCGACGGAGAGAACGGGGATGAAGTGGAGGAGAATGGGAACGAAGAGGAATGGGAGGAAGACGAAGAGCTAGTTGGGGCGGAAGCAGCACCGGTGTTACCGGAAGAAGCGTTGGCGGCATGCAGCAGGATGGTGGTTATTTGACGAGTTTGGAGGCGAGAATGGGGACGTATAGATAGGCGGTGGTTTTGAATTTTTAGA…
161	156	14	1821	1808	+	LINE/Tad1	ACCCTGCTGAATATGACTTGAACTGGACCCAGTCCTGCCAGCACCCCTCTTATCTCATTCGAATAATCCACACCCTCTGCCAATGTGTACTCCCAGACGATGACATCAAAGACACAATGCAACCAACATCTGCCCCATGGGACATGCCCCCTATTACAGTAGACATCTCTCCCTGACCCAAAGACAAGGCTGCCATTGTGCACCTATCCTGCCTCTGACATCTCTGCCGGAACCCATGTAACATCTTTGCATACACCGATGGCTCCCAACTGTCCAACAACACTGGAGCTGGGTATTACATCCCTTATGTCCTCCCCCAACCTGTACATGCAACCATCCCCATCGGTAATACCTCTGAGGTATATGATGCAGAACAAAGAGCCATCAATGAATGCCTTT…
162	165	22147	22442	296	+	LINE/Tad1	GTACCATCAACTGAAGATAGGCCATGCAGTAATCGGAACACACCTTAAGACGATCAATGATGACAGATGCTGGTGGTGTCACTCCGGGGAACGCCAGAGCGCAGACAGTAAAGCATCTCATGAAAGAATGTCGACAATGGCGAGAAGCTCGGGAAAAGTTAAAGTAATCCGTCAAAAAACACCTGGCGACACCAGGACCTAAAACGTCTTTTTGCGGACAGGGACGCTTCAAAGTGAATACTCCAATACCTGGAAGACACGCAGGTAGGCAACAGAACGCCTGAGAAGGAAATGGA
163	165	24844	25500	657	+	LINE/Tad1	ACGATGTAGTTGGAACACACCTGGAAAGAACAAACTGCACAAATGATAATTGCTGCTGCTGGTGCAACACCCAGGAACATCAAACAGTTGAATATCTGAGTAAATGCTGCGGAAAATGACATAAAGAACAGGAAACTCTGCCCAGAAATATCTCAAGGGACCATGGCACCATAGAAGTATCAGTCACCTCCTTGCTTCAAGAGGATTCATAGTAGCTCTACTAGATTTCAGAAAAAAATGCAGAAGTTGGAAACAGAATAGCTGAGAAAGAGATGGAAGAGAAGAGGAAAGCGACGAGGTTCTGGGATGGGCAGAGACACAAATAATGGAAGAAAATGTGATGATGGCAGACCAGAGAGGTGAAGAGAATAAGAGAACAGATCTTGAGACTGAAACGGA…
164	167	51209	51483	275	C	LINE/Tad1	GGAAGCGATGGCGGACGCTGATAATTGGTTGTACGGGGAATTTTGGGAACGAGTAAAGGCTGGAGCTGGAGACGTATAGAGAACAGCGTTTAGACTCTTCTTTTGTGTATTCGGGGATGTATAGAATGAGGCGTTAAGATGGGAATGTTGGAAACAAGGAAGCTGAGACGCAGCACTGTATTATGATTGTACAAAACATGCAGGACAGAAGGACATTTAGACTGTATTTTAGGCGAAAATTCTTAGGATAGCCATAATAGATTTATAAAAAAAAA
165	168	38636	39264	629	C	LINE/Tad1	AACTCCGCACGGGACACGGTCACTTCGGATCCTTCCTGCATAGGATGGGCTTCCGAGACTCGGATCGGTGTACCTGTACTGCCGGACATCGGGAGACACCTCGACACCTCCTCTTTCACTGCCCCCGGTACTCCAAAGACCGTCTCGCAGCTGCCAAATCAAGCCGCATGCCCCTTCATACGAAGGCCTTCTTATATAGCAACATATCACATAAGGCATTGGCAAACCTGATCCGCGATACCAAGATAGGAACCAGATTAGATAGGGAACAGAAGAAAGCGGAGAGATAAGGGGCGGTGATAGTAGAGGATGAAGAGGAATCAGAGTCGGACGACGAAGATGATGAGGCGGAAGATGCAGAAGAAGGAGAACGGAGAGAGGCGGTGCTAGCGGAAGCGA…
166	168	41582	41929	348	+	LINE/Tad1	CTATGGCACCACCGCAAGATCTGCCATCTCTTTGCATCAAGAAAATGCACAGCGGCGCTACTGGAATTCATCGAGAACACCGAAGTGGGAAATAGAACGGAAGAGAAAGAAATGGAACGAAGAGAAGAGGAAAGAGATGAAGTCCTGGGATGGGCAGAGACAGAGACGAGGGACGAGATGTGGGGATGGAATATATTAGAAGAGCAACCGGAACAGAGAGCAGGGGATATGGATACAGGAAGAATGGCAAACAGAATGAGAGAGGCGGCGGCGCTTATCGCGCGGGTAGTAGCAGAATTAGAGGCGGCGGGAGCGGTGCTAGAAAACGGTTAAAGGAGACGAAGAATG
167	172	17260	17689	430	C	LINE/Tad1	GAGTAGAATACCACTGAACACCGGGACACGCGAACAACGAAGGTAACAAACAGGCATGCTGAGTTGCGAAAGAGACCGCAGCCCACCCAGCCCGTGGATCCATATCGCGCCTACCGAAGACGGAGAGGTTCACTTCCCTTGCCCACCTCAACCGGATAACGAAGGGACGGAAAACCGAAGAGCGTCAGAAATGGTTGCAAACCACGTACCGGGAACGGAGGGACTACGTCTTTCCTCAAACGAAATCAGACCGTGTAGTCGCGAAAGCCCCGAAGCACCTGGCGATGCGGTACTCTCAACTTAAGACCGGCCACGTAATAGCGACGCATCCTGAGCGGATAGACGCGCGAGACGACGATCGGTGCTGGTGGTGCCAGTCTGGAGCACGCCAAACTTTCC…
168	178	66891	67811	921	+	LINE/Tad1	GGTAATTTATTCACCGACGGATTACGCCTCGACTCCGGTTATTGCGGAAGCTCCGTGGCATGGAAAACGGAGGACAATGAATAGCACAATTTGAGATTCCACCTCGGAGACGCAAAAAAAGTCTATGATGCCGAACTCTACGCCATCGCCGAAGCCTTACAGACAGCAAGAGATCAGCAGGTAAGAATAAACGGAAGGAAGGAAGTCCGAATCTACTCCGACTCGTCATCAGCACTAAGGCGAATTCACGACGACGGCCGTGGCCCAGGCCAATGGTTGGTAAAGAGGATCGCAAAGAGAGAGAAATTGCTTCTATAGAGAGGATACTCGGTAGAATACCATTGGGTTCCAGGTCACGAAGTAATCCGTGGGAATGAAGAAGCCGATAAAGCCACCAAA…
169	178	97588	97797	210	+	LINE/Tad1	ACAGAAGGAAGGTGCAGACCTCTGTAAATACCGAAAACTAAAGAAAAGCTAGAATGAAGGCGACACGATGAGACAGTAGGCGAATGTAAGGAAGAGAGAAAAGCAAAGAACGCCAAAGAGAAACGAGAAAGAAAAGCGAGAAATAAGAAGTTAGAAAAGTAGAATTAGCATACCCCGATCTGGGGTCAAATAATATGACAAAATCAAAAA
170	188	22724	22939	216	C	LINE/Tad1	ACAAGGACATCGTTACACAGTCTTTGCTGACGCTCAGGCGACTATCCAGCGATGCGCCTCCCATGACGCCGGGCCGGGACACTTCTTAGCTCGGCAGATTATTCTCAAATCCCGAACCATTACCGATAACGGCAACTCCATCGACATCCGGTGGGTTCCTGGGCATAAGGACGTCCCTGGAAATGAGCAAGCCGACGTTATGGCCAAGGCCGGAGC
171	188	101282	101673	392	+	LINE/Tad1	TTGAACTGATGGGTTTTGTCTTGATGATGGCAAGATTGGCTGCAGCATCGCTTGGCAGGACATTCACTGGGAAGGTGGATGGATGGAGCATCCTTGCATTTTGGGTGAAATAAGGAGGTCTTTGATGTGGCGCTGTATGTCATTCACGAGGCATTATGGATGAGCACGTCATGGGTTACACAAGGCCGACGTTACACAGTGTTTGCAGATGTTCAGTCAGCAATTCAACGATGTGCTTTCGACATCTTGGTCCCGAGCCAGGGGCTGGCCATAAAGATTATCTTCAAAGCCAGCAGGATGATCGAAAACAGGAATATGATCAAAATTCGGTGGGTTCCAGGCTATAAAGGCATCCCAGGAAATGAAGAAGCTGATCGGATGGCCAAAATCAG
172	189	65731	66710	980	+	LINE/Tad1	TCAAAGAAAACGAGATCGCAGATAAGGCAGCAAAAGCAGCAGCGAAACACCCGGCAAACCACCAAACAAGACGAATCCAACCACAAGAGCAGTTCACATCGCTATCTCAACTTCACCGGTATACGAAGGAACAAAAAACCAAGGAAAGGAAGAAATGGCTGGTAACGACAATGACAAATCGTCAAGGATACTGCCTCCCAACACAAGCCCAACCAGACAAGACAGCAATGATGGCCACCAAACGCCTAGCCACCCGATACTATCAATTGAAGATAGGACACGCAGTCATAGGAACGCACCTTAAACGAATAAAAAATATTGAAGACGACAGATGCTGGTGGTGCCACTCCGGCGAAAGACAAACAGTAAAGCACCTATGCAAGGAATGCCATCGATGGA…
173	191	44135	44818	684	C	LINE/Tad1	AAGAGAAAGACGGCTGAGATCCGGAGGAGCGAAACGAAGGAATGGATCCGATCCAGGACAGAGCATGGCAAAGCTTATATCCCACGGAAGGAGCCAGGCATAAGAAAAAGCCTACGGAACGAAAAGAAGGGGGTAGCAACACGGTACTACCAGCTCATGACGGGGCACGCAGTGCTAGCACCCTACCTAAAGAACAAACTGAAGAGAGAACCAGAAGATTGCTGGTGGTGTGAGTCAGGAAAGAAACAAACAAGGGAACACCTCTTTAAAGAGTGCATAAAGTGGAAATATGTGATCAAGGAGTTGTGGAGGAATGTAGGGAAAGACGTTGGTTAGCGGCGAGCCAAGTGGAAATCAATAGCACAGCTATTCAGAGAGGAGAAGGCAGAGAGAGAAGTT…
174	198	173	382	210	+	LINE/Tad1	GGGCAGATGGAGTACATGAGGTGAAATGAGGGGAGAGAGGGGCGCAGGGAAGGTGCAGAAGAGGCTGGTGGGAGTCATCCTTTTCTTTTGTACATGGTGGAAACAAAGGCAGGAAAATGGTCAAAAACATGGGCAGGGAAGGACAGGAGGATGGGGAGGAGCCTGGCGAGGTGGCCTCTGTGCCAGCAAGGCACTTGAAACATTCGAAGC
175	199	114989	117533	2545	C	LINE/Tad1	GCCGGTGCCCTTCTCATGGATGTTAAAGGAGCCTTCGACCATGTGTCAAAAACCCAACTAACCAATTGGATGGAAGAACTGGAAACAGATCCACAAATCATACAATGGACAAATAGCTTTATGACAGACCGCAAAGGCTCCCTGGTTATAAACGGACATGAGAGCGCCATGCAGGAAACCAAAACCGGAATTCCACAAGGATCGCCAGTGTTCCCCATACTCTTCGCAATTTACATCTCAGTCATACTCGAGGAATTTGAACAAGAAGTGATGGGAGCAACAGGGTCATCATTCGTATACGACATCTCCTGGCTGGTATCAGGAAAAGACATAACGGAAATCACGAAATTGCTGGAAGCATGCGGAGCGGCAGCAAAGGCTTGGGCAGACAGAAATGCT…
176	199	117543	120109	2567	C	LINE/Tad1	TATACAGCAAACCAAAGGCAAACGCGACAATGCTAACCCACCCAGAGATTAAAAAGATCATATTGGAATCGGCAAGAAATACAGATCAAGCCATCATAAACATTAGAGCCATAACCCAGTGGCAAAAAATAAAAATACACCAAATACCAACCAACCCAAGATTTGCAGCGGAACCACAGAACAGCGGAGACACCGACAGAGTCTACACAGCTTCAGAAGCAGCCTTGGAGGAAATCAAACTACGCATCCAGTCGGAATACGCACTCACCGTAAACAATGTGAGATGGATCAAATCTGTCACACACTAAATGGAACAGGCCAAACAAGGAACCCTGCCAAAACACACCACAGTTGTCGCCCACGTCTGCGAAGAACAAAAAGCGAAAGAATGGATGACAA…
177	199	120304	120552	249	C	LINE/Tad1	TCCACCTCCACTTCTTGAAAATCGAAGACAAAACAACAAGAGCAACACCCAAAAGGACTTTCTGCCGCCGGAAACATGATGGAGGACGCGTCCAATCGTCCACAGGATGGAGGCCAAAAAGCTCCCGGATCTGGACCCGAATTCGGACAGTACTGCGAGAAACCCCAGGAAACAGCCTCGGATTTCTCAGATCTAACCGACTTTGAAGATGACGAAGAAGACGAAGATGACGAAGAACAGGAAGAACAA
178	209	41	697	657	C	LINE/Tad1	TGGCTAGGGAAGTATCGAACTGGGCCATAGACAATGGCATCACCACAGGATCGGACAATCAAGTAGTCCACTTTGAAATGAACTCCCTCCACCCAGACTCCACTGTCTCACCCACCACTACCCACCTGAACTGGCACAAGACGAACTGGGATACCTTCATCACTGAGCTGCAAAACCTCTCTGCATCATCCTACCCCAGATGGTGCCACCTCTGAGCAAACCCATCTGCCCGCCATCTCGATGAATGGGCGGCCCTTCTATGCAACACAATACAAAAGGCAGCCACAGCTGCAACACCTACCCTGACCCCCTCGCGGCGATCGAAGAGATGGTGGATGGAGGAAGTAAGTAGAATGCAGACAGCCATGCCAGTTGCTCATTGTAAGTGGAAACAAACGC…
179	209	715	1770	1056	C	LINE/Tad1	ATGATCACCCTGCCATCGAGTGAGGACTACAACACCCTCAAATGTATGAAGGTAGTAGTACCTTTCAAGCAATGAAAGGTTACAGAATTCTTCACGGCTCGATCCACCAACCAGTGCCATAGGTGTCAGAAGTTCGGACACCACCATGCTACTTGCACAGCAGAAAGCGGACCCACCTGTGCGATCTGTGCAGCCATCCACCCCACCGAATACCACCAATGTGCTGAATGCCCCAGCAAGAGAGGCTGCTACTGCCTTCACACCAAGTATAAGTGTGCAAACTGTGTTGATGTGGGACACACTGACACTGAGCACACTGCATACAATACCAGGTGCCCTGTGAAGATGGCGGCAGTACAAGAAGTATGGCAGAAAACATGACCCAAGCCAACCACCACT…
180	213	159583	159880	298	+	LINE/Tad1	ATCTTGGCCGTAACAAGGAGGTCTTTGACGCCGAGTTGTACGCGATTTACGAAGCAATCACGCTTTTTGCATCGCGGGTTACACGAGGCCATCGTTACACAGTCTTCGCTGATGCTCAGTCAGCAATCCAGCGCTGTGCCTCCGACGTCGCCGGCCCGGGTCAACACCTAGACAGGCTCATTATCGCCAAATCTCGGAGCATCGTTGAAAACGGGAATGCCATCGATATTCGGTGGGTCCCGGGCCATAAAGGCGTCCCAGGAAACGAAGAAGCCGATAGGATGGCCAAACTCGGTGC
181	220	18646	19102	457	+	LINE/Tad1	CCTGGAAAGACAGAAGTGGGCAACAGGACGGCAGAAAAGGAAACGGAAAGAAGAGAGGAAGAAAGAGACAAAATATTAGGATGAAACGAGATGACAAGGACATCGGAAGAAAGAGAGGAAGAGGAATGAATGGAGAACGTAGAAGAAAGGAGAAGAGAAGTTGAAGAATTTATCGCGGAGGTGCTAAGAGAAGCGGAGGTTGGCGGCTACTTCGATGAAAATGGGTAAAATAAATGAACGGAGAATAAGGGAGAACGAAGAAGAGTGACAGTGTACGGCAAGGTAAAGCCAAACATGTAAAAACCAGAGAATAACGAGGTTAGATCAAAGGTGACACGAAGAGATAGAAGGCGAATGTAAAAGAGGGCAAAGAAGAAAAAAAGATTAAAGATGGAAAAG…
182	220	60140	60795	656	+	LINE/Tad1	ACAGGACACGGCCACTTCGCATCTTACCTCTACCGTATGGGCTTCCGGATAGCGATCGCTGCACCTCTTGCCCTTCCGGACCTCGAGAAACCCCCCAACACCTCCTATTCCAATGCCCGCGCTACTCCCAGGCTCGTCTCATCGCGGCGAAGAAAAGCCGCATTCCGCTACACACAAGCCTTTCTCTACAGAGACATAGCACACGAAGCTCTTGCGGAGCTCATCCGCGAGACCAGAATCGGAACTCGTATGGAGAGGGCCAATAAGGAAGTAGAAAGAGAAGGCAACGAGGAGGCAGAAGGAGGCGGACCCGAGGAAGACGGGGAAGACGAGGAGGAGGGGGACGAAGAGGAATGGGAGGAGGATGTGGAGTTAGTTGGGGCAGTGGCGATGCCGGTG…
183	220	109234	110187	954	+	LINE/Tad1	TTCACCGATGGATCCCGCCTACCAACGAGACACTGTGGATGTTCACTGGTATGCATGACCGAGACAAAGGTGTGGAATCGGCGCGAATTTCACTTAGGCAACAGGAAAGAGATTTTGGATGCAGAGTTATATGCAATCGCCAAAGCATTAAAAGAGACCATAGAACGACACATAAAGATATTCAACAAAAGGTTAATAAGAATCTTCACAGACTCCGAATGGGCACTGCGCAGCATTCAGGACGATGTACGTGGGCCCGGCCAATGGCTTGTTTGAAAGATAGCAAAAAAGCGGGAGAAGGCCCTGATGATTGTCGGCTACACAGTGGAATATCACTGGGTACCAGGACAGAGGGCATCACCGGAAACGAAGAGGTCAAAAAGCCGCAAAGGAAGCAGC…
184	225	148370	148864	495	C	LINE/Tad1	ACAGACCCGCGGGCATCTGTTCGGGGAATGCAGACGCTGGCAACAAGAGTTAGCCGAGCTACGAAAAGAGGTGGCACGAATCACGGGGAAGACGAGGAGATTGAGGGAGCGGTTGAAAGCGGTGGATTTGTTTACGGATGATCGACTTACAAAAGCAATCTTGGACTTTTTGGCTGCGACTGAGGTCGGCAGGCGTTATGAATAGACACCCTATTGGGCTGGCCGGGAGAGTTGGATTTCTTAAAATGTTTTCCTAAAATTTGTAACACTGGTTCCGGTTAAGGATACCTAGTTTGAGTTTGCTTTCTCTTGTTGGCATCACGTTTTTCTTTTGTTTCTTTTTTTCTTTTGTTTATTCTTCTATTTTTCGGGGACGTATTATTGGGAAGCAGGAGATAG…
185	225	238544	239298	755	C	LINE/Tad1	ATGACTGCGAATAAAAGACTGACAACCAGATACTTCCAATTGAAGACCGGACACGCCGTGATCGGCACACACCTTAAGCGAATAAAAACCATCGATGATAGATGTTGGTGGTGTCACTCCGGGGAACGACAGACGGTAAAGCATCTAATGAGAGAATGCCGACAATGGAGAGAAGCCAGAGAAAGGTTAAAGAAATCGGTCAAAAGACACCTATGGCAACACTACGACTTAAAGCATCTTTTCGCAGATGGAGACTCCACGAAGCCAATCCTGAGATACCTGGAAGAAACCGAAGTGGGAAACAGAACAAGGGAAAGGGAGATGGAAGAGAGAGAAGAAGAAAGGGATGGATTACTAGAATGGGAAGAAATGCAAAGGGAACCCGAGGAACGGGAGGAA…
186	225	239299	239509	211	+	LINE/Tad1	AACAGGCAGATAAGGCAGCAAAAGCAACAGCCAAACACCCAGTACAACACCAAACAAGACGACTCCAACCACAAGAACACTTCACATCGCTACCCCAACTTCATCGGTATACGAAAGAACAAAAAACCAAGGAAAGGAAGAAATGGCTGATAACCACAATGGCAAACCGCCCAGGATAATGCCTACCGATAAACCAACAACCTGACAAAGC
187	225	258060	258738	679	+	LINE/Tad1	AGAGAGATATCATATGGGAAACCGGAAGGAGATTTTCGACGCCGGACTTTATGCCATAGCCGAAGCCTTAAAGCTAGCTTTCCAAAGAAACATCAGAAACCCAACCAACATAGAAACCGTCCAAGTGTACTCAGACTCAACAGCAGCACTACAAAGGATAAAGGACCCTAACCTGTGCCAGGACAATGGATTGTGGAAAAGATCGTAGAAATGGAGCGCCAAATCATGGAAATAGGGCATAGGGTGGAATACAAATGGGTCCCCGGACACGCAAATGTCAAGGGCAATGAAATCGCAGATACAGTAGCCAAAATAGCTGCCAAACACCTAATACAGCGGCAGACTAGAAGACTCCAACCAAAGGAGCACTTCACGTCACTATCCCACCTACACCGGTAC…
188	233	20	603	584	C	LINE/Tad1	GCGGCGCCAGCAGTGGCTAGGGAGGTAACCAACTGGGCCATCGATGATGGGAAAGCCACCGGCTCCAACCACGATGTCCTCCGCTTCCAAGTCGCCTCATTACACCCAGACGTAGACACTGTATCAGGAACACCCTGCCTGAATTGGCACAAGACAGACTGGGACGTCTTCACAACCACCGTTCAAAAGCTATGCAACACCTCACACCCCCAGTGGACCCACCTCCGATCTCACCCCTCCGCTCGTAACCTAGACGCCTGGGCAGCCCTCATCCAAGACAACATACAACTCGCTGCCCAGGAGGCCACCCCACAGACGGTCCCCTCACCCCGGTCGAAGAGGTGGTGGATGAAAGAGCTGGATGAAACAAGGAAGGCTATGACAAGCGCGCACAGGAAC…
189	233	608	1384	777	C	LINE/Tad1	GCTAATTGCGTAGCAGCAGGACACGAAGACACAGAACACCCTGCCTACACCACGAAATGCCCTGTGAAGGTCGTGGCAGTGCGTGAAGCATGACAAAAAACCCGCCACGGCCCGACTGACGCTGACAGCGAGATCCCCGCTGAGACACACCCCATCACTGACACTACCATGACCGCCGATGATTAACTACAAACCATCAGCGGCGACCCTCAGCATCGTGTCTCACAACATGAACCACAGCACCACCGCCTTGAATACCCTGTTGAATTCAATGGGAACCACCGCCGACATCATCCTCGTACAGGAGGCTAACATTAAAGATCCAAAGTTGACACACCCCAATTTCCTTCTTCTCATACCCCCACGCGGTCATCATAAAGTAAACCGCACAGTGACATA…
190	233	1404	2225	822	+	LINE/Tad1	TATCACTCGACTACCGCCTCCCCCTGCGCTCTCAATAACCACCCGGCAATCGCCAGATTTTCGAGCGGATTATTGTTCAGCGCCCCCAATTTACCTTTCCGCAACATTTTCAGTCCAGGCCATCTCTTTTTCAACGTGTTACACGGTGAAAAGGAGATCTCCGGGCCCCTGAAAAAGTCCAGCGGCACGGTCATCAAAACCCCCCCCACAACCACCAAAAATCATCGATTTTCCGGCGGAATCCTTGTCGCACCCGCAAACACTACCTATCCCGACATTCTGATGCCTCCCCGCTCCTCCGTTGTGGAGAAACACCCTCTCCCTCCTGACAAACCGCCCACACGCGACCTCGCTACCAGCAAACACGCTAACGCAGAGCCGCAAGACATGCATGCATGC…
191	234	93865	94800	936	+	LINE/Tad1	AAGGTGATAGCGAAGGCCAAATCGGCGGAAGGGCGTCTCCGGAGCTTGCTGGCAAGTTCGGTATCCCACCGGCGAGTGCACGGAATGTGCAGGTGGCTATCATACAATCCACCCTTCTGTACGGAGCGAGCTCTGGTGGGCTGGCCACGAACCCATGGCTGAAGACGTTCAATTAGCGATCAATAGGATGGCAAGGGGTACGCTCGGAATGTTACGATCCACTCCGCTGGGCCTCCTCCTTGCCGAGAGTGGACTCACCCCAGCAGTCCCGCTCCTGAAATACCGACTGGCTCGGTACGCCCAACGCCTCCTCCACATGCCGTGGGATTCAGTCGGCCCGGAGGTCATCCTTTAAAAAACCGGATCGGTGCTAGCGAAGACGTTGAAAGCCGCCTCTCA…
192	234	134878	135527	650	C	LINE/Tad1	CCATCGACGACGATAGATGTTGGTGGTGCGATTCCGGCGAACGTCAAACGGTAACCCACCTAATGAAGAATCGCCGTCGGTGGAGAGAGGCGCAGGAGGGGTTAAAGAAAAGCGTCAAACGACACCTCTGGCAACACCACGATCTACAGCACCTCTTCGCAAACAGGGATGCTTCCAAGCCACTTTTGAGATGCCTGGAAGCTACTGAGATCGGAAATAAGACCGCGGAAAAAGATATGGAACAAGCAGAAGAAGAAAGGGACGCCATGTGGGGATGGAATGTACTGGAAGAAGACCCGGAAGCAGAGAAAGAGAGCTGGAACAGAGAGAATGGCAAATAGAATAAGAGAGGCGGAAGTTCTTATTGCAGGTGTATGGGCGGACGTGGAGGGGGCGGGG…
193	234	143139	143438	300	+	LINE/Tad1	CCCCCCCCCCTGTGTTTTCAACAACCACCCAGAAATCACCAGATTTTTGAGCAGATGATTGTTCAGCACTCCCAATTTACCCATCCACAACATTTTCAGCCCAGGCCCTCTCTTTCTCAATGCATTACACAGTGAAAAAGGGATCTCTGGGCCACTGAGGAAGTCCAGCAGACAGGTCATCAACACCTTACCCCACAAACAACAAAAACAATCAATTTTCCAGCAAATCCCTTGTTGTACCCACCAAAACAATCCATACCAAAATCTGCATGCCTCCTTACCCCTCTGTTGTGGAGAAAC
194	247	98	2401	2304	+	LINE/Tad1	CCACACAGCAACCACTGACCCCCCTGCATTTTTTAACAACAACCTCAAATTTCCCGGCTCTGCTGACGCAAATCGCTTTATCGCACACTGTTTAACCTGAATCCCGAATTCCAGGCCCGAATTCCTGTTTACCATTGTGGTTCAGCCGAAAAATGCGATTCTGGGACCTCCGGACCAGTCAACAGGCCTTTCCATCAATGCCGCCCCACCTCCCGCCCTCTGGTCATCAAACAAACCTTATTTTCGGTTTCAGCCTACCGAAATCCCCCCCTCCCCAAATTCCCCTATCGCCAGCAGCACTGGTTGTGGTGAACCCAAAAATTTCCCTCCTTTCGGACCCCCCTTTCTTCGCGAAAATATTTTTTCTTGCTTAACAAGAGCCTCATCACGTGATCCTCT…
195	249	117432	117883	452	+	LINE/Tad1	ACCGGGGAGTATCGCTTCAAGCAGTGCTCCCGATGGATGCCTGGCATAAGGGACCTCTGGAAGAGAGTAAGCAAGGACGTGGGGTGGAGACGGGCGAGATGGAAACCCATTGCGCGTTTGTTCAGAGAAGAGAGAGCGGAGGAGTCTGTTGTGGAGTTCCTCAGAAGAATGGGGTTGGTAAAATACATGGCACGGGAGGACCAAGAGAAAGTGGTTCAGAGGAGCAGAGTGATGAGGAGTGGGGGGTTAGACCCAAGAGGCTACCCCGGAGTTATTATCTTGTTTGCTTTTATTTTTGTGTAGATATAAATTTATGGCGGAGCGAGAAGCGGGGAGCCACAGTTGATGCCCTCGCGGCAGTGGACGAGGAAAAACGGATAAGCGGAGGCGGAGGCGGTT…
196	250	40742	41248	507	C	LINE/Tad1	AAGAAATGGCTTGAAGATTCATTAGGTGATCGCCAAGGATGCATCCTCCCGACAACCAAGAAACCTGACGAAAACGCCATGAGAGCTCCCACACGACTCGCCACAAGGTACTATCAACTCAAGATAGGACATGCAGTTATCGGAACACACCTCAAACGGATAAACACCATTCAGGATGATAGGTGCTGGTGGTGCAACGATGGCGAACATCAAACTGTCAGACATCCGCTTAAATTCTGCCCGAAATGGAGAAGAGAACGACAGGTTTTATCAAAGAAAATCGAAAAGAACTGATGGTATCACCACGACATGGCACACATGTTCGAGGACAAGGATTCGACCGAGCACATCCTTAAATTCCTACAAACCACGGAAGTAGAGAATAGGATGAAAGAGAAG…
197	266	8624	9466	843	C	LINE/Tad1	GGACTGAACTACGGAGCACACTGAAACTCCCCTGCTACTGCTGACTCACCGCACCGATGATCCTTCACATGACTGCTGGGACCAAAGCCTTATCCACCATGATCTCAGCAACTGAGATCATGACTGCCGAATGGGCACACACAACATTAAGTAAGCTCCCCAAAGGGGAGGACACACTCGTCACACTGACGGTAGGCTGGAAGATGCTGCTGGACGAGGACGACAAGACATGCAGACTACCCCCAACTAGAATAAAAACAAAAAAAAATAGAAAAAAAAAAAAAAAAAAAGAGAAAAACAAGAGTGAAGAACGAGATAGGGGAGGCAGACAGGGGGATGAGGTTATGATTGGGACTTGCCCTGGGTTGTGGAGTCATGTCTGTATGGTTGGGTTGGTTT…
198	269	25437	25759	323	C	LINE/Tad1	GAGGAAAATGGACGAACGGTGGAGGAACGGAATGAGGGGAAGTGGGGAGTGGAGAGTTTACATATTTCTTTTGTTCTGTTTTTGCTTTTGGAGGAAATAAAGGCGGGTAAATGGCTAAAAATGGGAAGGGGAAGGGTGGAGGAAAGGGGGGAATGACCCGGCGTGGTGGCCCCTGAGCAAACAGGGCTCTTGGACATGATGACGCGAGACGGACTTGAAACGGAAGAGAGAGCATACAGGCCAATATGCCAAACACGACGACCGCTCTGGGGCGCTTCCCAGCAGGATCCTGGGGTAACAACCGGACCTGAACTTTGTATATA
199	274	159095	161266	2172	C	LINE/Tad1	GGAGCACTCCTGATAGATGTCAAGGCGGCTTTCGACCACGTGTCCAGGACACACCTAACATTACAGATGGAACAACTTGGAGCCGACCCCGGACTGATCCGCTGGTTGGACAGCTTCATGACAGAACAAAGGGCCTCCCTGATAATCAACGGACTGAAGAGCGCAATGAAACCAGTAACAACAGGAATCCCACGGGGATCACCGGTATCTCCCATACTCTTTGCAATATACATATCAGGAGTATTTGAAGCGGTCAAAGCAGAAACAGAGGGCATCGGACTATTCTTTGTCGACAATGTCTCATGGGTGGCAAAAGGGGCAAACATCGCGGAGGTAACTACATTACTGGAGACATGCGCGAAGATCACAAAGCAGTGGGCAAGGGACAACGCCATAGAA…
200	274	161302	162087	786	C	LINE/Tad1	TATGCGCAAAATTGAAACGATGGTGGATCAAAGCGATAAAACAAGCAAGAAAGACAGCCACAAGGGCAAAGTGAATGGAAAAACCAAGGGCGAATAATGAGCGAAGAAGAAAAGGAAAAAAGCAAAACACTCCACAAATTAATAAGAAGAACAAAGAGAAGATATTGGAATGGATGGGTACAAGAAGGCGAGAATAATGACATCTAGACGGCAGCAGGATATATGAAACCGAAGCAGGGAACCGGAATATCTCCACTGAGGAGGAGACCTGATATTAACGAGGCCAAACAACATACATATGAAGGAAAGGAAGAACTACTTAGGGAATCAGGGTTCTCACCACTACCACCAGCAGAGGCCCGTGAGCTACCACTAGGTGGGAAAATCTACAACAAGATA…
201	274	216905	217355	451	C	LINE/Tad1	AGCCACCAAACGACCTGACGACAAAGCAATGCAATCACAAAAACGACTGGCTACTCGGTACTATCAATTAAAGATAGGACACGCCGTAATAGGAACCCACCTTAAAAGGATTAACACCATCGACGACGATAAATGTTTGTGGTGTAATACGAATGAATGACAGACCGTCAAGCACCTCTTCAAGACTTGTAGGAAGTGGAGGAGAGAGAGAGAGAAGAGATGAAAAAGAAAATAAAACCGGGCCTGTGGAACCATAATGATATGGCACACATGTTCGAGAATAAGGACTGCACGGAATATATTTTAAAGTTTATAAAAGAGACGGAAGTAGGGAATAGAACCAAAGAAAAAGAAAAAGAACAAAGGGACAATGAACGGGATGAACTAAATGGATGGGAA…
202	280	836	1084	249	C	LINE/Tad1	GCTATGACCTGATTACCAATAGTGTTTCCTTTGTTTATTTATCACTTTTTGGCAGTCATTGGTGATTAGGCAGGGGAGCCACATTTGATGGATGGATGGTATATTATTGTATTATCTAGATGGTGGACCAGACTAGGGGTGACGCATTTAAGGCACCTAACGAGGCGGGCCCTTCGGGCAAGCAGCGCCATATTCTAGATAGACTGCATGCACCGCTATAGCAAATATACGGATTAAAAATCAACAAAA
203	288	1872	2162	291	+	LINE/Tad1	GGAGGGAGGGGGTGGTGGCTAGGAGAAGTGACTTTTTTCTTTGGTTCTGTTTTTGACTTTGGAGGAAATAAAGGTGGAAAAATGGCCTAAAGATGGGCAGGGAAGGGTGGAGGAAAGAGGGGAATGACCCAGCATGGTGGCCCCTGAGTGTACAGGGCTCCTTGGATCAGATGATGCTAGATGAAAAAATGGCATGATGAGACTTGGGAGACTATACTCCCACCCACTTTTGACAGCTCTGGGGATTACCCAGTGGGGACCTGGCATCACACCCAGGTTCTGAACATTGTA
204	293	41	1197	1157	C	LINE/Tad1	CCCCCCTGCATTTTCAACAACCACGCTGAAATCGGAAGATTTTATTGCGGATTACTGTTCGGCAGCCCCGAATTACCTATTCGCAGCATTTCCAGACCAGGCTTACTCTTTTTCGTTGAGTTTTCATCGAAAAAAGAGTTTTCGGGCCCCTGAGAAAAGCCCCGCGAACACGGTTCCATCAACACCGCACCCCACACACATCAAAAATCATCATTTTAATCGCGGATTCCTTGTCGCTACCGCAAAAATACCTTATCCCGAAACTCTGATGCCTCCCCGATCCTCCGCTGTTGAGAAACAGCCCCTCCCCCCGAACAAAGCACCCCCGCGGGCGCTCGCGACGAAGAAACGCGCTAACGCAGAGCCGCAAGCGCCTGACGCGTCCGATGTGGAAATGCA…
205	293	1222	4090	2869	+	LINE/Tad1	TGGCGGAGACATACAACCTACTACACCCCGACCAGATCGGCGGGAGACCCCAGCGCTCGGCTATCGATGCAGCGATGGTGCTCACGCATGAGGTCGAAGTGAATGCAAGGCAGAAGTTGATAATATCATCACTTTTCCTGGACATCCAAGGTCCCTTTGACAATGTCTCATCTACCCGCCTCCGGCATACAATGTGCCAACTTGGCTGCCCTCGCCCAGTCCTCACCTGGGGAGCTACCGTCCTTGCCAACAGAACTACAGTGCTGTCCTTTGATGGCCGTACAGACACCCAACGACCTATCAACACCGGCATTCCCCAGGGCTCCCCTGCCTCTCTGATCCTATTTTTAATATACCTCCGCCCCCTCTTCGATGCCCTCCAAACCACCCACCCAATGC…
206	293	4158	5282	1125	C	LINE/Tad1	GCAGCACCGGCAGTGGCTAGGGAGGTAACGAATTGGGCCGTCAATGATGGGCAAGCTACCGGCTCCAACCACAAAGTCCTCCACTTCCAAGTCGACTCATTACACCCAGACGTAGACACTGTATCAGGAACGCCATGCCTGAATTGGCACAAGACAGACTGGGGCATCTTCACAACCACCCTTCAAAAGCTATACAGTGCCTCACACCCCCAGTGGACCCACTTCTGATCACACCCCTCCGCTCATAACCTAGACACTTGGGCAGCCCTCATCTGAGACAACGTACAACTCGCCACCCAGGAGGCCACCCCATAGACAGTTCCCTCACCCCGGTCAAACAGGTGGTGGACAAAAGAGCTGGATGAAACAAGGAAGGCTATGATGAGGTCACGCATGCAG…
207	293	5287	6212	926	C	LINE/Tad1	TTGGACATCACCATGCGACATGCCCCGCTGATAATGGACCAACCTGTGCCATCTGCGCCGCTGTCCACCCCACCGAGTATCACCAATGTGCAGAGTGCCCCAGCAAGAGAGGCTGGTACTGCATACACACCAAATACAAGTGTGCTAATTGCATAGTTGCAGGACATGAAGACACAGAACACCCTGCCTACACCACGAAATGCCCCATGAAGGTGGTGGCAGTGCGTGAAGCATGGCAAAAAACCCGGCACAGCCAGACTGATGCTGACAGCGGGATCCCTGCTGAGACATACCCCATCACCGATACTACCATGACCGCTGATGATTAACTACAAACCATCAGTGGCAACCCTCAGCATGGTGTCTCACAAAACGAACTGCAGCACCACTGCCTTGAAT…
208	294	128707	130517	1811	C	LINE/Tad1	ATGATAGCTACTGTACAATCATCGGCACTATTCGGAGCAGAAATACGGTGGCACAACCAGAAGAACCGAGCTGCAGATATCCAGGAAATGCTCAATCGGTCAGCCAGAGTAATAACGGGATGCATGAAAATGTCGCCGACCGCACCTCTCATAGTGAAAGCAGGCCTTCACCCAGCAACCACCCTCCTAAATGACAGCCAAAGAAAATACACGGCCCGTCTAATTGGATTACCAGAAGGACACCAAGCGAAGAACATCCTACCAACCAAGATAACCAAAGGGAACCAAGAAGAAGAACCCGACGAAAACTACACCCCACGCCAGGTGAGACCTNNNNNNNNNNGCGATGACCTCGGAACCAGGCTGGCAAAGGGAATCCAGGATGTCATCGATGAAAAA…
209	294	130591	131874	1284	C	LINE/Tad1	CTTCTCCGAACTTACCGACTTCCAAGACGAAGAAGAAGACGAAGAAGACACAATGGAGATCGAGACGAACAAAGAAACCAACCAATCCAGCCCTAAAATCGAAAAGCCAAACCCCGAGATCATCGAAGCAAACCATCCGGCCAACCCGGAGCCAAGCTCAAGCCACCTGAACCCCCCCCCTCCCGAACCCCAACCAACCAACCCCGAGACCCCTGAGAACCCCACACAGACCTTGCGCACTGACGTTAAAAATCCCGCTAAACTGACAAGACCAAAGAAACTGAAGAGACCTGCTGCAAAGGAGAAACCGAAAAGAACGGAGCAGAGAGACAGCAACCATGCTAAGAAAGCAACGGCACTGGCAACAGCAGCAGAGAGAACCCTAAAGGCTAGAAGATC…
210	294	167996	168849	854	C	LINE/Tad1	TCACAGACAGTCACGATATGCGCAGAGAATAGCACGGCAACCAACGGGAACCCGAGGCACCAAAGAGATACTCCTGGAAATGCAGAATTGAGCGCTATCGAGAAGATTAAAAGAAATGACCCTCCTACGAGACAACAACATGGAAATGACGTACCTGGAAATCGGCAAAGCATTCGAAGGAGACATCATGCCAGACTCGGAGGAGATAATAGCGAAGAGGGTGGCAGACGAATGGCCTCACACGGGAAATACAGTATGGACCGACAGATCACGACTGGACGATGGGAGAGTCGGCTGCAGTGTAGTCTGGCGGGATAGCAGTAGAGAGTGGACAGGGGAGAAGATACACCTCGGAACAAACAAAGAGGTGTACGATGCGGAACTACATGCCATCGAAAG…
211	298	144773	145370	598	C	LINE/Tad1	GGCATGAGAAAGATTCTAAAGACAGAAAAGAAGGCAGTTGTGGTGAGGTGATTTTGATAGATGACAGGCCACCAAGTACTTACACCACACCTAAAAATGAATCAAAAAAAAAAAAAGAGACACTCAGAACAGTGTTTGTCATACAGCACAGGAAGGATAGAGAGGAGCAAGCCCTCATTTAAGGAATGTAAGAAATGGAAAGAACAAATCCAATATCTGTGGAGGAATGTAGGCAGAGATATGGGCTAGCAGAGAGCTAAATGGAAGTCCATAGTGAAGGTGTTTACTGAAGGGAAAACAGAGAAGGCAGCACTGGAATTTTTACAAAAGACTGGGGTCGGAAAGATGACTGGCCATGGAGGGCCAAGAGCGCAGCAACAAGAACGCAATGTGGAGAGC…
212	300	77415	77688	274	C	LINE/Tad1	GGCAGGCGGATATTTAGAGAACGGATAAACGGAAGAAGAGAACGGGATACGAAGAAGTGTAACAGAAAGATGAAGTAACATCTATAAATGCCGGATATTAAAGAAGATTAGAATGAAGGCGACACGACGAGATAGTAGGTGAATATAAGCATGGAAGAGAGAAAAGCAAAGAATACCAGAGAGAAAGGAGAGAGGAAAAGTGAGAGGAAAGGATTCAGAAAAGTAGAATTAGCATACCCCGACCTGGGGTCAAATAATATGACAGAATCAAAAA
213	303	1	201	201	C	LINE/Tad1	ACAACGACTCCCCAAAGCCAAAGGCGTATGCTGCACCACATCGGAGAAACCTCGACGCAGCCTACACAACCCTCCCACGAAAACAATCCACAGCTATCCTAGGACTTCGTACCGGCCACGGGTACTTCCTCGATTGTCTCGCCCGCATCCCCTCCCGCAAATACCCTTCCCGCAACTGCTCCTGCCCCCTTCACCCCCCCC
214	303	159711	159968	258	+	LINE/Tad1	AGAACGGATGAACAGAAGGAGAAAAACGGGAAACGAAGAAGTGTAACAGAAGGAAGGTGCAGACCTCTGTAAATGCCGAAAACTAAAGAAAAGCTAGAATGAAGGCGACACGATGAGACAGTAGGCGAATGTAAAAAAGGAAGAGAGAAAAGAAAAGAATACCATAGAGAAAGGAGAAAGAAAAGCGAGAAAGAAGAAGTTAGAAAGTAGAATTAGCATACCCCGATCTGGGGTCAAATAATATGACAAAATCAAAAA
215	304	38775	39044	270	C	LINE/Tad1	AAACGACACCTATGGCAACATTACGATCTGCAGCACATCTTCGCAAACAGGGACGCTTCCAAGCCATTACTGAAGTATCTGGAAGCTACTGAGATCGGCAATAAGACAGGCGAGCGTGCGGAAGAAGAAAGGGACGAGATGTAGGGGTGGAACGTCTTGGAAGAAGAACTGGAAGCAAGACAAAGGGATGTAGAAAGAGATAGAATGGAGAATAGATTGAGAGCAGCGGAGGCGTTTATAGCGGGGGTGGTAGCAGAAGTAGAGGCGGCG
216	306	45964	46478	515	+	LINE/Tad1	AAGACCCTCTGCCTGGCCCCGGGCAATGGCTCATCCCACAAATAGTAGACACAGAACAACAGATTATGGATCTATGCCACTGGGTGGAATACCACCGGATCCCTAGATACGCTGACATTGAGGGGAGCGAAACCGCGGACACAGCAGGAAAGGAAGCCGCAAAATACCAGTACAACGCCAAGTACGCCGCCTCCAAGCGAAGGAACACTTCACGTCACTCTCCCACCTGAACCGCTACACCACGGAAAGGGGATCAAAGGAAGTTCATCAAAACCTTGGAAGATCGCCCCGGATACACCACCCCATGCCAACAACAACCAGACAAAATAGCAATGACAACAAACGACACCTATGGTACCACCACAATCTACAGCACCTCTTCGAAAACAGTGATGCCAC…
217	306	64792	65036	245	C	LINE/Tad1	ACGGATAGAAGAGAAAGAGGGGACAAGGAAGAGAATAAAGTGCGGCAGGACGTGGTGAGATGTACCGAACTGTAAATGCCGAAGGGCAGCAAAGCTGACCCAACGGTAGCACGAAGAGAGAGTAAGAATGTACCAAAGAAAAGACAGAAGGAAAGAAGAAGAAGCAGACGAAGTAAAGATGAAGACAATGTTATTTTATTAGAATGCACCGATCCGGCGTCTTAATAATATGACAAAATCAAAAA
218	306	92421	92744	324	+	LINE/Tad1	GTCAAACGACACCTATGGCAGCATCACGATCTACAGCACCTCTTCGCAAACAGGGACGCCTCCAAGCCGTTATTAAGCTACCTGGAAGCCACTGAGATCGGGAATAAGACGGCCGAAAAGGATATGGAACGGGCGGAAGAAGAAAGGGACGAGATGTGGGGGTGGAACGTCTTAGAAGAAGAACCGGGTGTAAGACAAAGGGATATTGAACGGGACAGAATGGAGAACAGAATGACGGCGGCGGAGGCTTTTATACCGGGGGTGGTAGCAGAAGTAGAGGCGGCGGGGGCGTTGAGAGAGAACGGTTGAAGAAGCATGTAAACG
219	310	1078	1325	248	+	LINE/Tad1	CATGGCATCACGATGTAACCTGAGGCTAGATTACACGGGGTGTTTCCTTTGTTTATTTTTCTTTCTATATATAGTGGTCATGGGATTCGGCGGTGGTGCCACAGTTGACGTCTTTATTGCATTATTATGATAAATGCGGTTGACACATGCAAGGCCCCTTACGGGGCTGGCCGTTCGCGGAAGCGGCGCCATATTCCAGCTAGAATGCATGCACCGCTATAGTAAAGATCTTGATTCAAAACAAAAAA
220	317	962	1577	616	+	LINE/Tad1	GGCCCCTGTGAGACGCCCAGTCATCTTCTTTTTCACTGCTCTAGATACTCGAAAGACCATCTAGCCGTAGCAAAGCTGAGCCGAATTCCCCTGGACACGAAGGCCTTTCTATACTGAGATATTGCACATCGCGCGTTAGCAAGCCCCATATGGTACACCCGACTGGGAACCTGACTTTATAGGGAGCTAAAGGAGAATGAGATAATGGGAGGAAGGCCTGAACGCTGAATGGAGATGGTGATTGCAGATCCGCTAAAGAGTGCTCGAGGATGATGACAGCGAGAATTGGGAGGAAGAGGATGTGCGGGATGATGAACCCAAGGAGTTTTCGGAGGAGGTGTTAGAAGACGCGAATAGGTGGCTGTATATAGAGTTGGGAGACAGGGCTTAGAGTGTTGA…
221	320	1	625	625	C	LINE/Tad1	TCTCATTCCCTACCTGCCCTGCATTCACCATTTACAATTTCTATTCCCCAGGCAGACCACATGTGATCGCCGACCTCCTCCCGCAATTCCACCCCACTTCCCCATCAATCATCATGGGAGATCTAAATGCACACCACCCCTGGTGGGGAGGCACAAGCACGCTTAACGATGACCAGATACGATCACACCGAACTGAAGCAGATACCATTGCAGACTGGATGGAAGCACATGGCTTCTACCTGCAGAACAAACCTAGCCACCCAACCCATTTCCCGCGAAATGGTGGCTCCCCTTCTGTAATCGACCTATGTTTCTCAACTGGAAACATCACCCAAGACATCCTCGCACATGAAATCAACCCCGAATCCACCTCTGACCATGCCATCTGCACAATGTATC…
222	320	639	2122	1484	C	LINE/Tad1	ATCACTCTTGACACCACCATCCCCGATACTGCCACCACCGCTGACCAAACCCTCCAATCTATCAACAAAGTTATCAACGGATCCCCACATATCACCCAACCACCCTTCATCCTCGCACGAATCACCAACAACAATCGTTTAGTGCTTACCACCACCCCTACCACTAAAGCATCTGACTACGCTCCCTACCTACATATTATCGCCAATGCAACAAAATCTCTCAAGCCAGTCGAAACCAGAATCAATGAATGCTGGACCAAATTCCTCCTGCACAATGTTCCTACCAATGCTGACCTCTCGGCCATCCGATCCGAAATTGAAACCACCTACACCTCCCTCCAACTTGCACAAAACCCCTGCTGGCTTGTTCCAATGGACCGCCGCATTAACAAATCCGCA…
223	320	3328	3756	429	C	LINE/Tad1	ATCACTCTTGACACCACCATCACCGATACTGCCACCACTGCTGACCAAACCCTCCAATCTATCAACAAAGTTATCCACGCATCACCAGATATCACCCAACCACCCTTCATCCTCGCACGAATCACCAACAACAATCGTTTAGTGCTTACCACCAACCTTACCCCTAAAGCATCTGACTACACTCCCTACCTACAGATTATTGCCAATGCAACAAAATCTCTCAAGCCAGTCGAAACCAGAATCAATGAATGCTGGACCAAATTCACCCTGCACAATGTTCCTACCAATGCCGACCTCTCGGCCATCCGATCCAAAATTGAAACCACCTACCCCTCCCTCCAACTTGCACAAAACACCCGCTGGCTTGTTCCAATGGACTGCCGCATTAACAAATCCGCA…
224	326	1006	1399	394	C	LINE/Tad1	CACCTGGAAATCACCAGATTATCAAGTGGATTATTGTTTAGCACACTCAATATACCTTACTGCAATATTTTCAGATCAGGCCCTCTCCTTTTTAGTGTGTTCCATGGTGAAAAAGAGATCCCTGGGCCCCTGAAAAAGTCCAATGGCATGGTCATCAACACCCCACCCAACAACTACTAAAAATCATCAATTTTCTGGTGGAATCTTTGTTGCACCTGCAAAACAAATCTATTCTGAAAGTCTTATGCCTCCCCACCCCTGTGTTGTGGAGAAACCCCCTCCCCCTTGTGAAAAACCTCCTGCATGTAACCTTGCAATGAAAAAACACACTAGCACAGAGCTGCATGTCATGCAGGTATGTGACATGCAGGACAACATAATGCATGTCAATGAC
225	326	194959	197449	2491	C	LINE/Tad1	TCGCCGGAGCCTTACTCATGGATGTCAAAGGAGCGTTCGATCACATTTCAAAAACACAATTAACAAAAAGAATAGAAGAGCTGGAGACAGACCCGCAGATAATTCAACGGACAAATAGCTTTATGACAGATCGGAAAGCATTCTTGGTAATCAGCGGACACGAAAGCGCCATGAAAGAGACAACAACCGGAATACCTCAAGGATCACCGGTATCTCCCATCCTCTTCGCGATCTACATATCTGGAATCGTCGAAGAGATAGAAAAGGAAGTCCTCGGATCCACCGGACTGTCATTCGTGGATGACATATCATGGCTGGCTGTGGGCAAAGACGTAACAGAGATAACGAACATCCTGACACAATGCGCAAAAGCAGCAAAAGCTTGGGCAAACAGAGAAG…
226	326	197454	201391	3938	C	LINE/Tad1	GAGACGCAATGGAGATCGAGACGAACAAAGAAACCAACCAATCCAGCGCTATGATCGAAAAGCCAAACCCCGAGATCATCGAAGCGAACTCCCCGGCCAACCTGGACCCAAGCTCAAGATACCTGAACCCCCCACTCCCGAACCCCCAACCAACCAACCCCGAGACCCTCGAGAACCCCCCGCAGACCCTGCATACTGACGTTGAAAACCCCGCCAAACTGACAATCCCAAAGAAACTGAAGAAGCCAGCTGCAAAGGAGAAACCGAAAAGAACGGAGCAGAGAGACAGCAACCGTGCTAAGAAAACAATGGCACTGACAACAGCAACAGAGAGAACCCTAAAGGCGAGAAGATCAGAAAGAATCATCGAAACGCTTACCGAAAGAAACACAAGAAACC…
227	326	201427	201632	206	C	LINE/Tad1	TCCACCTCCACTTTTTAAAAATTCAAGCACAAACATCTTTTAGAGACCCAAAAACAGACGTCCTCCCGCCTGACAATGGCGGAGGACGCATCTAATCGTCCAGAAGACGAAGGAGGCCAAAGAGGCCCCGGAACTGGACCCGAATTCGGCAAATATCGCGAGAAATCTCAAGAAACCGCCTCGGACTTCTCCAACCTTACCGACTT
228	327	85	352	268	C	LINE/Tad1	ATGATGGGAGAGAGGTGAGGAGGGGCAGTGAGGAGGCTGGCAAGGAAGAACAAGGCCAGGGAGAGAGGGGCAATGGGAAGAAGGAAGGATGGCCTAGAGACATTATCAGGTAGAGGAAATAAAGGTGGAACAACCAGAAAAAATGGTGGGGGAAGGGTGGAGGATAGAGAGGAACCTGGCACAGTAGCCTTTGGGCAAACATGGCTCATGGACTAGATCACATGAAACAGACTTTAAGCATGGAGACAATGGGGTAACAGGCCCCAAA
229	331	116475	116979	505	C	LINE/Tad1	TGACCATCCACAGGGTGCCAGGGCACACCAATTTAGCCGGCAATGAAGATGTGGACACACTGGCAAAACTAGCTATGACATCACCACTGACAACACAATTAGTGATCTCCATATACTGGCTCTGATGCAAAATATGGGAGCAATATACCACAGACTGGAGCACATGCTACATGACATCCCCAAAGCCCAACACCTACTCCACACCACACTGCTACCACCTCGATGCAGCATACACCACCCTCCCATGAAAACTCTCAACAGCCATCCTTGGACTATGCACAGGACATGGATGCTTCCTCACATGCCTGGTATACCCCCCCTCAGATAAATACCAATCTAGAAGCTACACCTGCCCTCTGCACCCCCCTCAAAGGCTGAAACGCCTACTGCTATCATGCC…
230	331	117818	118175	358	C	LINE/Tad1	GAAAAGAAGATGGCAAAGAGGGAGAGAGGAGACAATGGGAAGGGGAGAATGTGGAACAGAGTCAGAGTGCAGAGAGAGGCATGGAAGGGAGCAGGGTGCTGACAAGGGGATGTTTCTTTTGTTCACTTCATTTCATATCCTATGTACTTTGCTTTCAGAAAAAACAAAAAAGGGGGTGATTAATGGGATGAGGAAGGGAGGATGACAGGGAGGATTACCCGGTGAGGAGGCCTCCAAGCAAACAGGGGTCATTGACCAAATGATGCAAGATGGAAAGAACCAACAGACACAGCAGGGGGGCTACAACCCCACCCAGCAAGACTGCTCTGGGGCATTCCCAGTGGATACCAGGAGTAAC
231	332	3550	5026	1477	C	LINE/Tad1	GGAAATCATGAGATTTTCAAGCAGATTATTGTTCGGCAGCCTCAATTTACCTTTGCACAACATTTTCAGACCAGGCCCACTCTTTTTTGTGATGTTGCACAGTGAAAAAGAGATCTCCATGCCCCTGAAAAAGTCTCACACTCTGGTCATCAATGCCCCCCCCCTACAACAACCAAATACCATCAACTTTCCAGCAGAATTTTTGTTGTAACTGCAAGAACAATCAATCCCAAAATTCCAATGCCCCCCCATGCCCCCATTGTTGAGAAATGACCTCTCCTGCCTCATAAACCACCTATGCAGGTGCCCATGAGCAAAAAACACCCTGATGTAGAGCTGCAGGATGTACAGGATGCATCTGATGACAACATGCACATCAACACATGCACTGACATCAGT…
232	333	1917	2256	340	+	LINE/Tad1	AAAAAGCACCAGGACTAGACCTTATGGGATTTTGGGCCATTCAGTTGCTCTGGGAATGGTAGAGCAAAGGAGTAGTGATTATGAGGGCATGCATTAGACTAGGCCACCACCCCCAAGGGTTGAAATCAACAAAGGGTTAGTACTATATAAGGCCAACAAACTGGACTACTTAATCACCAAAGCATACTACATAATATCAGTACTTAACTGTCTCAGCAAGGTATTTGAGTGAGTAGCTGCAGACCTACTATCATAAAAAATGGACCCCAAACTACACACTGGACAATTTGGATGCAGGAAGAATACATCCATGGTGGAAGTGGCAGCATGCATGACCAAC
233	333	2302	4440	2139	+	LINE/Tad1	CTGATGGACATCAAGGGGGCTTTTGACTATGTGTCCAGGACTTGCATAACATTATGGATAGAACAACTTGGAGCCAACCATGGACTGATTAGCTGGACAGACAGCTTCATGACATAATGAAGTGCCTCCCTGATAATGAATGGACTGGAAAGTGCAATGAAAGAAGTAACAACAGGAACCCCACAGGGATCACCAGTATCTCCCCTACTCTTTGTAATATACATATCAGGAGTATTTGGAGTGGTTGAAGCAGAAACAGAGGGCATCAGACTATCCTTTGTCGATGATGTCTCATGGGTGGTGAAAGTGGCAAACGTCACAGTGGTAACTACAGTACTGGAGAAATGTGCAAAGATCACAAAGCAGTGGGCAAGGGACAACATGCTTCAATTTGACATA…
234	337	13254	14564	1311	C	LINE/Tad1	TCATGGGCAATCACGCTATGCCCAGAGGATCCTCAGACAACCGGAGGAAACCAGGGGAGCCAAAGAAGTGCTTCTGGCAACGAAACACTCGGCACTTTCCAAAAGACTTAGAGAAATGAGTCTCCTGAGCGGCGACCGAATGGAAAAGACATACCTGGAAGTAGGGAAGACCTTTCCCGCTTGGAGGACGGTAGGGTGGGATGCAGCGTCGCATGTCAGGACAATACAGAAGACTGGACAGGGCAAACCAGCCACCTCGGAACCAATAAGGAAGTCTACGACGCGGAGCTTCTCGCCATAGAGCAGGCAATAAGACGGTTCATAGACAGAAATCAACAAACTCGAAACTACACAATCTTTAGTGACTCCCAGTCAGCGATCGAACGGTGTAGAAACGAC…
235	340	29616	30106	491	C	LINE/Tad1	CTTATCGATAGTAATCTAGGCACACGAAGTACTTGCGGAGCTTATCCGTGATACTAGACTTGGTACTAGTATGGAAAGGGCCACCAAGGAAGAAGAAAGAGAGGGGATCCGGGAAGCAAGGGATGAGGGAGGACACGAGGATGAAATGGAGGAGGATGAGGACGAAGAGGAATGGGAAGAGGATGGGGAGCTTGTCGGGGTAGAGGCGGCACCGGTAATACCGAAACAGGCTTTAGAAGCGGCGGGACGTTGGTTGTTTAATGAATTTGGCGGCGAGAATGGGGACGTATAAATTGGCGTTGATTTGCAATTGTTATAAGGGTTAGAGGGGTTTCTTTTAGAGGGTTTAGAGAGTTTTTAGAGGGTCACGGGGGACAATTATTACTGTAACAACACCAT…
236	341	37	3062	3026	+	LINE/Tad1	CAACTACCAGGTATGCAAGCTGACATCATTTTCACACATGCCAATTCTTTCCTTGGAACATGAATCTCACTACCAGCCAACCCCTCCTTTACAGTATACAACTTTTACTCCCCTGGAAAACCCCATGCACTAGCCAACCTCCTACCCTCCTTTTGCACCCGACTCCCTGCAATCATTATGTGGGACTTCAATGCCCACCATGAGTGGTGGGGCAGTACAACCAGTATCAATGATGACCAAATTTGATGACAATGAGACCAATCACAGACCATCACTGAATGGATGGAAGACTACCAATATTTCCTGCACAATAAACCTAGCCACTGAACACATTTCCCCAGAAATGGCATGCAGCCATCTGTCATTGACCTTTGCTTCTCTGCTGGGCACATTACCAAA…
237	346	13341	14580	1240	+	LINE/Tad1	GAAACATCTTGCCAGATACCAAGAGTCAGAAACTATGAAGATAGCTGTGGAGTGCCCAGACCAACAGGATACTTCATGGACACACAGATCACAGTTGGAAGATGGCAGGGTTGGATGTGCAGTAGCATGGCAGGAAGACCAAGGTGACTGCAAAGCTCAGACCATCTACCTGGGCAGGAATAAGGAAGTCTATGATGTGGAGTCATTTGCAATATAGCAGGCCATGTGACTCTTCACACAAAGAAAGCAAAAGAATCATCATTACACAGTCGTTAGCCACTCGCAGGCAGCCCTAATAGAAGAGTGACAGTGCCGGACCTGGACAAGCCATGGCTAGAGCGATAATGTATGGGAGCTATGTCCTCTTCCTCAACAACCTCATAGTTACACTGCGGTGGG…
238	352	6490	6749	260	+	LINE/Tad1	TTTATAGCGGCAGTTGTAGCAGAGGCAAAAGCTGGCAGTTATTTGTATGAGAATGAATAAGAAGGTAAGGAAGAAAGACACAGGACAAAGTGCGGCGGGACATTAAGGTGAAGAACGAACTGTAAATACCGAAGGGAAGCACAGCTGATACATCCGACGGCGGCACGAGGAGACAGAGACGAATGTACCAATGAAAGAAGGAAGCAGAAATAGCATGCCCCGATCTGGGGTCGTACATAATAATATGACAAAATCAAAAA
239	359	68290	70182	1893	C	LINE/Tad1	CTACACGAAACGCATGGCAAAGGCAATCCAGATGGAGAAACAAATCAAGAGCCTCCACCGCAAGTATAAAATGACACCGAAGAATGTTCGTAAGATAATGACAGCTACCATCCAATCATCGGCCCTTTTCGGCGCGGAAATATGGTGGCGAAACCAGGTCGGTCGGATAGAAAAAATCCAAGTCATGCTAAATAGACAAGCCCGCGCGATCACAGGATGCATGAAATCAACCCCAATTGGCCCTCTCACCGCTGAAGCATACATGATACCAGCCACGATCACATTAACCAACCGACAACGCCGGTACGCGAAACGCATCGCAGGTCTCCCCAGCGATCACTCGGTCCTCCAGGTCATCCCGGATGGCATCCTCAACTTCGATGCCGATCCTGCCGACAA…
240	359	74028	74262	235	+	LINE/Tad1	GCGGAGCAGGAAGAAAATGACGCGGAGAGCGAGGGTGAGACACCCGGCATGTATTAGGAGAAGGTTGGAGATGATCAAGAAGATGTTTACAAAGGCGTTGTTCAGAAGGGAAGAGGGTAGCCACAGTTGATGCCCATCGAGGCAGTGGACAGGATATGGTGATTGTAGAAGCGGGCGGTTACATACTCAGCAATGAGTGATAGTCGCATGAATAAAATTTGATTCAAAACAAAAA
241	363	67	466	400	+	LINE/Tad1	AGAAGAGACACAGGGGATGAGGGGAAGAAGGAGAGGAAGTCATGGAGGTGAGGGACGAAGGGAGAAGTGCAGGAGTAGAAGGAGTAGCGGAGAAGTGAGAGAGGAGAGGTGGGGGGGGCGGTGGCCCGGCGGAGTTATCTTTTCCTTTTCTTTTCTGTTATGTCTTGGTTTGTGGTGGAATTGAAGGTGGGAAAATGGCTAAAAATGGGCAGGGAAGGGTGGAGGATATGGGGGAACAACCCGGCGTGGTGGCCCCTGAGCGCACAGGGCTCCTAGAACTGACGATGTGAGATGGATTAAGACCCAACAAGAGGGGAGACTACACTCCCAAACCCTCATAACAGCTCTGGGGCTTACCCAGTGGGGACCTGGCATCATGCCCAGGTCCTTAACATTGTAT
242	363	550	1950	1401	+	LINE/Tad1	ACCGCCTCCGAAACCGCTCCCTCCACCTTTTCACGGATAATCAGTCAGCAATCATACGAGCATCACGCCTGACTGGAGGCCCCGCACAAGAACTCGCTCGAGCCATCCATGACACCACCTCACTCCTACAAGCCAGCGGCATGCCCATAACACTACACTGGGTGCCTGGCCACACTGACATCACCGGAAACGATGAAGCTGATCACCTGGCAAAAACGGCAACGACCCTACCACCCTCCGTACCACTCCCAATCTCCCTGTCGTGGCTCTGCAGACAGGTCCATGAACAATACATCACTGACTGGCTGTCCTGGTTCAACTCCGAACCAAAACCCAAAACCTACGATGCCCCAGAAAAATGCAACCTTGACTCTGCCTACACCACCCGACCATGGAAAC…
243	366	23543	23810	268	C	LINE/Tad1	CTGGAATACATCAAAAACACTGAAGTGGGAAATGGAACGTAGAGAAGAGGAGAGAGATGAAGTCCTGGGTTGGGAAGAGGCAGATACGTGGGGCGAGACGTGGGGAAGGAATTTAGAAGAGGAACTGGAACAGAGAGCAGATGATATGGAAACAGGAAGAATGAAAATCAGAATGAGAGAGGCGGCGGCGTTTATCGCCAGGACAACAGCAGAATTAGAGGCGGAGGGATCTGTATTGGAAAACGGATAAAGGAGATGAACTTGAATG
244	367	31012	31410	399	+	LINE/Tad1	AGAGAAGAAGAGCGGGACGAGAATTTAGGATGGAATGAATTGATAAGGGAATTGGAAGAGAGAGAAGAAGATGACAGGAGAGAGAAGGACGAAGAACGAAGGAGAGAAGCAGAAGCGTTTATAGCAGAAGTATTAAGAGAAGCAGAGGCAGGTGGATACCTCGAAAACGGATAAAGAAAGAAGAGAGCAAAGAACAAGAAGAAGTGTAACAGGCGGACGGTGAAACCCCCTGTAAATGCCGGAGGATATGAGACAGATATACAGAAGGCGTCACGAAGAGACAGAGAAGAATGCAAGAATGGAAGAAGAAAATGTAAAGTCAGACAGACGAGGACAGAGAAGAAGAGGTAGAATTAGCATACCCCGAGCCGGGGTCCAATAATATGACAAAATCAAAAA
245	372	7514	8692	1179	+	LINE/Tad1	CTCCACCCAAAACCAAGCCCAAAACCCAGAACCTATCCCGCAAACCCCCCAAACCCCAAGACATTGTGATCCCTTGCTCGGACCCCCAGGCTCTCCCCGAAAGTGTCAAGGTAACTATTGGAATGGCGGTGAACGCCACCCTATGGGAAGCCAAGGCCCTGGCAACCCTCTCCATTATGACGGTCCACAAAAACATAGTGGGAAACCTCCTGCTCACCCCCGCTACACACACCCTCTCTGCCGACATTACCGCCCACCTCCCCACCATCAAAGAGGCTGCCATGAAGGTCCATCCCATGCTCCAACCCCCCCACCTGAATGAAAAATGGCACAAGCTGGCAGTCCACAGCATCCCCCTGGACTACTTCCGAGACAACGAGGAAGGCATGGTGAAACTCC…
246	373	5408	7333	1926	+	LINE/Tad1	ACAGACATCACAAGGTGCGCTAGAATAAAGAAGCAACGAGATGGCTGGGGATGTACCTCGATGAGACTCGCTAACCTTTGCAGCGCACCGCCTCATGGTGATTCGAAAGCTAAGTCGGCCAGGGGACATCTACGCAGCCTAATCAATAAATTCGGCATCCCCCCGGCGAGCGCTCGTAACGTCCAGATGGTGGTGGTCCAGTCCACTCTTTTCTGTGGTGCGGAGCTCTGGAGGGATGGCAACCCTAGAACGACACAACCATTCCAGTTAGCAATTAACAGGCTCGCAAGATTCACGTTGGGATGCTTCCGTTCGTCTCATCTCGGCCCTCTTCTCGTGGAAGCCAACATGACACCAGCGATCCCTCTCCTGAACTATGGCCGAACCCGATACGCGCAG…
247	377	42480	42718	239	C	LINE/Tad1	TGGGCTACGGCCAGAGTACGAGACGCGTTTCCTTTGTTATTTCTATATATGGCGGTCACGGGGTAAGCCGGGGGTGCCACACTTGACGTCTTTATGATTGTATTATTTAGACGGTGGACACGACCTAGGGGAGACGCAATGTAAGGCCCCTACGGGGCGGGCCCTTCGGGCAAGCGGCGCCATATTCTAACTAGAATGCATGCAACGCTATAGTAAAGATATTGATTCAAAAAAAAAAA
248	377	78144	78547	404	C	LINE/Tad1	AGAGAGGAAGAAAGAGACGAGATACTGGGGTGGAATGAAATGACAAGGACATCGGAAGAAAGAGAGGAAGAGGAAAGACTGGAGAATGCAGAAGAAAGGAGAAGAGAAGTTGAAGAATTTATCGCGGAGGTGCTACGAGAAGCGGAGGTTGGCGGCTACCTCGATGAAAACGGATAGAAAAAATGAAGAATAAAGGAAAAGAAGAAGTGCGATAGTGTACGGCGAGGTGAAGCTAAAAACCTATAAAATCCGGAGGATAGCTGAGTTAATCTGAAAGAGGCACGAAGAGATAGAAAGGTGAATGTAAAAGAGGATATAAGAGGAAGAATAAAGATAGAAAACGACAAGAGAAAAGTTAGATTAGCATACCCCGTGCCGGGGTCAAATAAAATGACAAAA…
249	378	91756	92413	658	+	LINE/Tad1	ATGGGACATGGTAACTTTGCGTCCTACCTCAATCGTATGGGATTCCGGGACGATGACCGCTGCTCTTCTTGCCCTTCCGGACCGAGGGAAACACCTCAACACCTCATTTTCCACCGCCCGCGATACTCCAAGGCACGGCTGATTGCCGCAAAGAAAAGTCGCATCCGGCTACATATCAAAGCCTTTCTCTATAGAGATATAGCATACGAAGGCCTTGCAGAGCTCATCCGCGACACCAGACTTGGCACTCGTATGGAGAGAGCCACCAGAGAAGAAGAAAGAGAAGGACACGTGGGAGTGGAAGGAGGTGAACTTGGAGTAGACGGAGGTGAGGTGGAGGAGGATGACGAAGAGGAATGGGACGAAGAAAATGAGGAGTTAGTGGGTAGCGAGGCGGCA…
250	383	88388	88844	457	+	LINE/Tad1	ATAGCACATAAAGAACTGGCCAGTCTAGTACGGGGCACCAAGATAGGAACCAGACATGAAAGACAAGAGAAGGAAGCGGAGATGGCGGGAGCGGCACTGGTGGCTGACGAATAAGGCGAAATTACGGAGGATGAAGATGACGACGGCGGTGGGGACGCGGAGGTAGACAGGGAGCGCGAAGAGTTTGGCATGGCATGGCTGGAAGAGCACGTAAATGAGATATTTGGACAATTTGACGACGATCATATGGATCTGACAGATGGAGGCACTTGATGCGATGGAGGCACTTGATGCGATGGTTATTTTGTTTCTTTTGTTATTTTGGCATAGAATACGGGGGAAGTGGTATACAGATTATTAAGACGTATTAGATATACAGAAACTACGCTGAAAGCACTA…
251	389	182004	183394	1391	+	LINE/Tad1	CATAGGTAGTTACACCATCACAGAAGATCCTGAGATAACTGTAGGGGACAAGAGGAGTCAGAGAAATACTTCTACAGATGAAAAACTCAGTATTGTTAGGGAGACACAGGAAGACAACCCACCTGAATGGAGCCAAAATGGAGAAAACTTACTCTGAGACTGGCAAAACTTTTGAAAGAGACATAATGTGAGACACACAGCAATCCTATGCAAAGAATGTAGCCAAAGAATGCAATGACTGGGAAAACACTACATGGACAGATGGATCACCATTGCAGGATAGGAGAGTCAGATATAGTATTGTGTAGAAGAAATACAAAGGTGGATGGACAGGAGAGGGAATACACCATGGAATGTGCTGAGACATTTATCACACAAAGCTCCATGCCATTGCATGAG…
252	394	68030	68547	518	C	LINE/Tad1	ACACCTATTCGCAGATAGACAATCCACGAAGCCAATCCTGAGATTCCTGGAAGAAACGAAAGTAGGAAATAGAACAAGGGAAAAAGAGATGGAAGAGAGAGAAGAAGAAAGGGATGGAATGCTAGGATGGGAAGAAATGCAAAGGGAACCTGAGGAACGAAAAGAAGAAGAAAGAAGAAGAATGGAAGAAGAAAGGCTGAGAGAGGTGGAAGAATTCATTGACGAAGTCATGAGAGAAGCAGAAGCAGGCGGATATCTAGAGAACGGATGAACAGAAGGAGAAAAATGGGAATTGAAGAAGTGTAACAGAAGGAAGGTGCAGGCCTCTGTAAATGCCGAAAACTAAAGAAAAGCTAGAATGAAGGCGACACAATGAGACAGTAGGCGAATGTAAAAAAG…
253	402	1	2253	2253	C	LINE/Tad1	CGCCCCATATGGTGGAGGAAACAGTTAACTGGGCAATTGATGATGACAACACCATGGGGTCTGACCATGAGGTCATACGCTTCGAGGTACACACAACCCACCCAGATGCTGAAACAACTCCCCTGACAAACCAACTGAACTGGAAAAAGACAGATTGGGAGCTGTTCACTGAAACCCTCTGTACCTCTTGCTCAGCCCTCACACCGGCCTGGACACACTATCGCAACCACCCCACCATGGCCAACCTTGATGTGTGGACGGAGTCAATATGGGATGGCATCCTTGATGCCGCAATGACGTCCACCCCCATACTACAAGTGACCCCCCAATCGAAACGATGGTGGACCCCAGAAGTCACCGTGGCAAGAAAGACAATGACCAAAGCGAGACGTAAGTGGA…
254	402	2262	3286	1025	C	LINE/Tad1	CCACCAAAGAGCTTGCAATCCTGAAGTGCAAACGAGTTATGGTACTCTTCGAGCCCCGGAGAGTCACCGAGTACCACTCTGCCCGACAGACCGACCAGTGTCAGCGCTGCTTGCTCTTTGGCCACCACTACACCAACTGCACTGGATCGCAAGGCCCCAACTGCGGCATCTGCGGCCAAAACCATTCCACAGACGACCACACTTGCAATGAGTGCCCCCATGGTAAAGGTAAGACTTGCGAGCACACCAAATACCACTGCAAGAACTGCGTAGATGCTGGCCTCCCCGATCTCGACCACCCTGGTTTCAGCAAACAGTGCCCCGTACGACTTCACATCTTGAAAGAAGCCTGGACAGCATCACAGAACCCCGCCACCACCCCATCCAACCCTGCCAACA…
255	402	3289	4851	1563	C	LINE/Tad1	CACACAGCGACTGCTGACCACCCCTGCATTTTTTAACAACAACCTCAAATTTCCCCGCTCTGCCGACGGAAATCGCCTTATCGCACACTGTTTACCCCGAATCCCGAATTCCAGGCCCGAATTCCTGTTTACCGTTGAGTTTCAGTGGAAAAACGTGATTCCGGGACCACCGGACCAGTCAACGGGCCTTTCCATCAACGCCGCCCCACCTCCCGCCCTCCGGTCATCAAACAAACCTTTTTTTCAGTTTCGGCATACCGAAATCCCCCCCTCCCCAAATTCCCCTATCGCCAGCAGTACTGGTTGTGGTGAACCCCAAAATTTCCCTCCTTTCGGACCCCCCTTTCTTTGCGAAAATTTTCTTTTCTCGCTTAACAAGAGCCGCATCACGTGATCCTT…
256	402	5368	5766	399	C	LINE/Tad1	GGGCACGAGGGGACGGACTAGATGATGACGGAAGGAGGCATGTGTGGAGAGTGTGAAATGATGAGTGGCGACGGAGGAAGGAGGCAGCGAAGAGAGTGAGCAGGAGATGGAGGGGGGCGGATGCCCGGAGGAGTTAAGTTTGCTTTCTTTTGTTTTGTTTATGCTTTTGGAGGAAATAAAGGTGGGCAAATGGCTAAAAATGGAAGGGGAAGGGAGGAGGAAATGGGGGAACGACCTGGCGAGGTGGCCTCCGAGCGAACAGGGCTCCTTGGACTCGACGACGCTTATGTACCAAACACTGAAGAGAGTTGGGGGACTACAACCCCACAACCAATGATGGCTCTTGGGGCCTATCCCAGTGGGGACCTGAGGTAACAGACAGGTTCTCATTCTTTGTAT
257	409	13633	16153	2521	C	LINE/Tad1	CTAATGGATGTGAAAGGAGTGTTTGACCATGTCTCAAGAACCCGCCTGACAGACAGACTCCAAGAACTAGAAGCAGACCCAGAACTGGTAAGATGGAAAAACAGTTGCATGACGGAACGAAAAGCCTCCCTGAACATCAACGGCCATGAGACAGGCATGAAACCAACAAACACCGGGATCCCACAAGGCTCGCCAGTATCACCGATCCTGTTTGCGATATACATCTCCGGAGTGTTTGACCAAGTTGAACAGAAAACAGGGGCAACAGGACTGTCCTTCGTAGACGACATATTCTGGATCGCATCAGGCAACAACATCAAAGAAATCACAGAAATACTGGAGGAATGTGGAAAAATAACCATGGAATGGGCGCAACAAAATGCAGGGGAATTCGACGCA…
258	409	16190	17681	1492	C	LINE/Tad1	ACGAGAAGAAAACAAAAAACAAGAAAAGGAAAAATAAGAACAAAGATGGGCAAAAGGACAAAGAAAGGGATTGTAAATGTGTATGACCAGAGGATAAAGAAGAATCCGATGGGTAAAAGACGAGGCATGATGGAACTGGAAAAATGGGAGGAAATCATCGACAAAAGAACAATACTGGCAGGGGACTTCAACGCGCACAACCCTAGATGGGGGAGCAACAAACAAAAAGACAGCGATCACATCATCTCAATCATCGACAAATACAATCTGACAATCCACAACAATTTCGAATACACAAGACACGCTAACGACAACCAACAACCATCGATTATCGACCTCACACTCTTAGCAGGCCTAACAATAAAGAACTGGTTAATACTCAACGACGACGAACACCAC…
259	409	17926	19538	1613	C	LINE/Tad1	AGGAAGGCACCAGGGCAAAAGACCGAAAGACCAACAGAAAAATCACCACACAAAACCACCCCTTGACACCAGTCAAAGAAACCAAAGACACCCGAGACAGACAAATGGTAATGGAAAGAGACTCAAAAACAAAGAAACCGGATGCAAACATCGACAAAAACAATTATGCAGACAATAAACAAACACCTGACCAACCACAACATCCCGGAACACATTCGCATCGACCCGGCAAGAGTAACCACAAATGAAAACTGGAGCGTATTCTCCAAATACAAAGCAAACGCAAAAATGCTAACACATGACAAAATTAAACCCCTGATATTGGAAGCGGCAAGAAACATTGACAAAGACATCATAGATATACAAGAAATCAACCCATGGCCAAGAATCAAAATCCAC…
260	409	131957	132393	437	+	LINE/Tad1	ACAAAGAAATGGCTCCAGGAGACATTAGGAGACCGGCAGGGGAACATCCTCCCGACAACAAACAAACCCGACGAAAACGCCATGAAAGCGCCCAAACGACTCGCCACGAGATACTATCAGCTCAAAATAGGCCACGCAGTAATTGGAACGCACCTTAAGCGAATAAACACCATCCATGACGATAGATGCTGGTGGTGCAATGAAGGCGAACGCCAAACCATCAGGCATCTCCTCAAGTTTTGCCCAAAATGGAGACGAGAGAGGGAAACCTTATCGAAGAGTATAAAGAAAAACTTGTGGTATTATCATGATATGGCACACATGTTTGAAGGCAAAGATTCGACCGAGCACATCCTCAAATTCCTACAAACTACGGAAGTAAAGAATAGGTTAAGAAAG…
261	411	24	1367	1344	+	LINE/Tad1	CGGAGACAGAATATATCCCCAATGGCAGAGGCTATCCAATGCCTCCATCAGCACTGTGTTGCTCAAACAGGCCTGGGCACAATTGAGACTACACGACCACGCTCCACCAGCAAGGCCAAGGGGACAATTATCATTGAACCTGCGGCACAGGCAGAGGAATCCGCGCAGTGGTGGAAAGGCCTGAAGGCTGAATGCTTCTGGACAGATGGGTCTCAGCTACCAAATAGACATACAGGAGCAGCGGTAGTCCAGCATACCAATGGACAATTCGAGGCAGAGGAGTTCTACCTCGGAACAACAAATAAGGAAGTCTTTGACGTGGAACTCTACGCAATCCAAAGGGCCCTCCACAGTGCTCAACGCCTACTGGATGGTGGTCAGCATTTCACCAGGCTAACC…
262	414	13333	14284	952	C	LINE/Tad1	GGGAAACGAAATAGCGGACGCCGCTGCTAAGGAAGTCGCATCAACACCGGTACAACGTCAAACCCGCGGCCTAATGCCCTCCGAACACTTCACGTCACTCGCACACCTTCACCGTCAAAACAAGGAGCACCAGACGAAAGAAACAAAAGAATGGCTGACTCAGACGCTGGGAGATCGCTCTGGGTATAACCTACCATGACACCAACGCCCAGACAAAACGGTAATGACGACGAACAAACGGTTAGCCACTCGGTACTACTAACTGAAGACAGGACACGCCGTCATCGGAGTGCACCTAAAGCAAATAAACACCATCGACTACGATAGATGCTGGTGGTGCGACTCAGGAGAACGCCAGTCGGTAAAGCACCTGGTAAAACAATGCCGCCGGTGGCGCGA…
263	415	64611	64902	292	C	LINE/Tad1	TATTGCGGAGGTGTTAAGAGAAGCGGAGGTTAGAGGTTACCTCGATGGAAACGGGTAGAGAGAATGAAGTTAAAGGATAACGAAGAAGTGTGACAGTGTACGGCGAGGTGAAGCTAAACCTGTAAAAATCAGAGGATAACAGGGTTAATCTGAAGGTGACACGAAGAGATAGAAAGGCGAATGTATAAGAGGATAAGAAGAAAAGAAGAAGACTGAAGATAGGAAATGAAAAGAAGAAAGTTAAATTAGCATACCCCGTGCAGGGGTCAAAATAATATGACAAAATCAAAAA
264	417	1	1722	1722	C	LINE/Tad1	TATCACTCGACTAACCCCTCCCCTGCGTTCTCAACAACCACCCAGTAATCACCAGATTTTCGAGCGGATTATTGTTCAGCGCCCCCAATTTAACTATCCGCAACATTTTCAGCCCAGGCCCTCTCTTTTTCATCGCGTTACACGGTGAAAAAGGGATCTCCAGGCCCCTGAAGAAGTCCAGCGGACAGGTCATCAACACCCCACCCCACAAACAACAAAAATCATCGATATTCCGGCGGAATCTTTGTCGCGTCCGCAAACACTACTTATCCCGAAATTCCGATGCCTCCCCACTGCTCCGTTCCGGAAAAACAACCTCTCCCTCCCGACATACCTCCCTCACGCGTGCTCGCGAACAAAAAAGCGCGCTAGCGCAGAGCCGCACACTATGCAGGAACG…
265	417	1920	2314	395	C	LINE/Tad1	AGAGGAAAAAGGGACTGAAGAGGGGCAAGGCAGGGAGACGAGGAGCAGGGAGTGACAAGTAAGAGTTGCCAGAAGAGCGCTGAAAGGGGAGAGAAGGGAGGAGGGGAGGGGCGCAGGTGGCTGGGAGGGGTTATCTGATTCTTGTTGTTTGGGAGGAAATAAAGGCGGAAAAATGGTTTAAAAAAAAAAAAAAAGGAAAGGGGAAGGGTGGAGGAAATGGGGGAACGACCCGGCGAGGTGGCCTCCAAGTGCACAGGGCTCCTGGAACAGATGACGCGAGATGGATTATGAACCAAACGAGACTTGGGGGACTACAACCCCACACATGAAGACTGCTCTGGGGCACATCCCAGTGGGGACCTGGGGTAACAGCCAGGCCGTCAAGTATGTATTTA
266	420	1	451	451	C	LINE/Tad1	CCCCCCTGCATTTTCAACAACCATGCTGAAATCGGAAGATTTTATTTCGGATTACTGTTCGGCAGCCCCGAATCACCTATTCGCAGCATTTCCAGACCAGGCTTACTCGTTTTCGTTGAGTTTTCATCGAAAAAGAGTTTTCGGGCCCCTGAGAAACGCCCTGCGAACACGGTTCCATCAACACCGCACCCCACACACATCAAAAATCATCATTCTAATCGCGGATTCCTTGTCGCTACCACAAAAATACCTTATCCCGAAACTCCGATGCCTCCCCGATCCTCCGCTGTTGAGAAACAGCCCCTCCCCCCGACAAAGCACCCCCTCGGGCGCTCACGACGAAGAAACGCGCTAACGGGGAGCCGCAAGCGCCTGATGCGTCTGATGTGGAAATGCACG…
267	423	693	1169	477	+	LINE/Tad1	GTTACCCCCGGCACAAGAGGAGGAAAAAAGGACACAATTTGGTGGATTGGAATATTCTTTGATAGAAAACTCTCTTTTAATCATCATGTACATGTGAAGCTGACCGCCGCCTCTAGGTCATTCAGCGCCCTCTGCAGCCTCGTCCGTTTCCAAACAGGTCTGTCCCCAGCAGCCACCTGCTTACTATTCCATGCGTGCATCCAATCTAGGTCCGATTTTGGTGTGGAGATCTGGTGGCAGGGCCAAAAAGGCCTCGAAAACAAATTACAACAACAACAGAACAACGCCCTTCGACGTATACTCAATGCTTTCCAATCGACCCCAACCGTCGCACTTCACAACGAAGCTGCCCTCCCCCCAGTCTCAGTCCATCTAACTACAAAGCAATGCCACTACACT…
268	423	1795	3516	1722	+	LINE/Tad1	TTAGCCCATGGATACACCTCAATCAGACACTCGAAGACACAGCCCAACCGGTAACAACACCATGGAAGATGAGCCCCGTAACCATAGACATACCCGACCTATCTAAGGACGATGCCACACCCACTCACCTCCACCTCATACACCGCCTCCGGCAGGACCGTCAAAACATCATCATATACACCGACAGCTCCCAACTCTCCACCAACACCGGAGCCAGCTACTACATCCCACACGGCCTACCCCAACCCCTCCATGCAATTGTCCACATGGGAACCACCACCGAAGTCTACGATGCAGAGCTGAGAGCTATCTACGAAGCTCTGTTGTCCACTCACACCAACATCATCTGCCATAACCTCCTCCAGCACAACATCCACATATTCACAGACAATCAGTCGG…
269	423	3589	3954	366	+	LINE/Tad1	CAAACCTGCCATACGCAACCTCACGAACAGCCAACTCGCTAATGCAGAGATGCATGTGATGCAGAGATGCGATGCATACCATGATGCGATGCATGTTGATGTGCAATATGACGTCAGTGACAGCAACAGCAATGACAACACATCCCCCCCACATGACAGCTGCCTGACACCTGCCCAATGCAACAAAACACCCTACCCCGCCACCCCACACCATGCCAAACCCCACCTAAACCACAACACCATCTTCTCCCCTGACCCTCTCGCTGACACCACTGACCACTATGGAATCCAAAACACCAGAACACAGAAGAAAAACGCCCCCGAATCTCAACGTAAATGACAAGCCACCTCCACTGCCCACTCTGT
270	425	2415	2947	533	C	LINE/Tad1	CCCTCCTTGTGGAGGCAGGCATGACGCCGGCAGTCCCATTACTGAACTACCGACGTACGCGTTACGCACAACGCCTTCTCGGCATGCCGTGCGATGCTGGTAACGATGGCCCCGATGCGATGCTCCGAGTCGACGGTTCGGAGCTGGCTCGGATGCTCATGCAGGCTTCGCTAATAGGCCGGTACGAGGCGGAACGCGCTTGGAGACCTCAAGGCTGGGCCTTCCCAGGACTGTTAATGCACGAATCGACGCTATCATCGGCGTTAGCCACAGCTCTGGAATGGGAGGACTCCGAACGCATCGTCTGGACTGATGGATCTCGTCTTGATAATGGCAAGTTCGGCTGCAGCGTTATTTGGAATGCCGGCGATGGAGGCTGGCGTGGAAAGTCTTTCCGCC…
271	425	165371	165666	296	+	LINE/Tad1	AGCGGTTTTAGACTTTGTACGAAAGACTAGAGTTGGGAAAATGAGTGGCACGAGAGGGCCGTTAGCGGAGCAGGAGGAAAGCGACGCGGAGAGTGAGGTGTGAGACATCCGATATGTACTGAGAGACGGTTGGAGGGGAGGAAGAAGATGTTTTATTAAAGGCGGTTGAGGGAAGAGGGTAGCAACTTTTGATGCCCGTCGAGGCGGTGGACAGGATTTGGAGATTGTGGAGGCGGGCGGTTACATACTCAGTAATGAGTGACAGTCGCATGAATAAATTTGATTCAAAACAAAAA
272	426	1332	1697	366	+	LINE/Tad1	GGATCCAAACTTGACATGGGACAAGTAGGATGTAGAGCATCCACATATGAGATCATGGCAACTGGCCCATAACACCTTTGGACACATAGCTGCAACCTGGGCTCACAATGTCAAGTCTTCAATGTGGAATTATATGCCATCTGGAAAGCACTACACCTGCTCCCTGACTACCCCAAACATACCTTCCAACAATTTACATCTGTACCAACAATCAATCCTCAATACAAACACTCACCCACAATAACCAAAACCACCAATTTGCCCATGATGCCCTTAACCAGGCCCATGACCTTCACATTAACAGCTGGAATCTCCGTACAGTATAGACACCCTCACACTGTAACATCCATGGTAATGAACTAGCTG
273	426	3939	6132	2194	+	LINE/Tad1	ATTACCCTCAATACCACCATCCCTGACACTGCTGCCACTGCTGATCAAACCCTTCAAACCATCAATAAAGTTATCAATGAATTACCAGATATCATCCAACCCCCTTCATCCTCACATGAATCACCAACAACAACCATCTAGTGCTTACCACCAACCCTACCACCAAAGCATCTGCCTACGCTCCCTACCTCCAGATTACTGCCAATGCAACAAAGTCCCTCAAACCAGTTGAAACCAGAATCAATGAATGCTGGACCAAATTCCTCTTACACAATGTCCAACCAATGCCGACCTCTCTACCGTCAGATCCAAAATTGAAACCACCTACCCCTCCCTCCAACTTGCACAAAACCCCTGCTGGCTTGTGCCAATAGAACACTGCCTTAACAAATCAGCCTC…
274	426	7244	8413	1170	+	LINE/Tad1	ACCATCTACTGCCCCAAAGAATGATCAGAATACCACACTGAATGAGGCAAACACTTAGGCCTTCATTTCTCCACAGCAAAATCTGAACTCCTCCACTGTATCCCCAAAACCAGCAAAGACAAAGTAAAAGACCTGTCCTGTGACCCACCCCTCACCATTGACAACAAAACAATACCACCCTAGCTGTAGCATTAAATACCTCAGCATTCACATTGATGAATCCCTCACCTTCAAACGACATGCAATCTCGGCCACTGCTGAGGGAAGGACAACATTAGGCTCCCTACTTTTCCTCTGACACAAAGGCAATGGCATACCAACCTACATCACATGACACCTCATACTCACAGCCATCCTCCTAAAGATGATCTCAGCATCCCCTGCCTGGTGGATACCCAC…
275	427	40	2900	2861	C	LINE/Tad1	GAAACCAACGGCAACCCCAACAGCAATCGAAAAGGCAGCGAAATCCAGAAGATCCCAGAGACTATTAAAAGGAATGACAGACAGGAAAGGGCAGAACAAACCCCCAAGCCCTAACGACACAGACATACCAGATGCAGAACTGGATTTAGACATGGAAACCCCCAAAATAGAGCACAAGGAGGACCAAGGTAACAAAAACAAACAGAACCCCAGGGAAAAGAATAAACCAATCGCAGGAAAATACAATGCTGAACAAGCACTCATGATGATTTACAAAGCCATAAAGGATACCAATACCAAAGTGGACTCCATTGCCAGTGAAATGAAAAAGGTCCAAGCGCAAAATGCAGTAATAACAAAGGAACTCCGCCAAGTTCACCAATGGATCGGAGCATGCAT…
276	430	5061	7740	2680	+	LINE/Tad1	GACCCCCCCCCCCCCCTCGCCTTTTCAACAACCACCCAGAAATCGCGAGATTTTCGAGCAGATTATTGCTCAGCAGGCCAGTTTCACCTTACCAACGTATTCTCAGACCAGGCCTTCTCTTCTTCAGTGCTCACCATGGTGGAAAAGAGATTTCATGGCCCTTGAAAGTACCCTCAGTATTGACCACAAACAAACCCCCTCCCAACACAACAACTGTCATCAAAATCTCTGGTCGCAAACCCAATACCACATCAGAAACAACCCATCCCGAGCAACCGATAGCCCCCAGGCCCTCCGCGGTGAAGACTTGCCCCCTCAACCCCTATCCCCTGGACCTGATGCCCTCTCGCGACCTCATGTCTAGCGCCTATGCTAGTGCAGAGCCGCAAACCATGCAGC…
277	430	7752	11296	3545	+	LINE/Tad1	CCAGCGATGACAAGGGAGGTCACAAACTGGGCCATCAATGAGGAGAATGCCACAGGCTCTGACCATGAGGTCATCTGGTTCCAGGTGGAATCCTTACACCCCGACGTAGAGACAGCCATGACAAAACACCACCTCAACTGGAAGAAAACAAACTGAGAGACCTTCGCCACCACCCTTCAAGCGCTCTCAGAGGCCACCTACACCCAGTGGTTTGCCCTTCGCAGCAACCCCATGCACAACAACCTAGACACATGGGCAGTGATCTGCCGAGACTCTATCCAGACTGCCATTGAAGCCTCCATGCTGCCCCTGAAACTGACCCCCCGATCCAAATGATGGTGGATGGCCAAACTACAGCACATGAGGCAGGACATGATTTGAGCGCAGCATAGGTGGAAA…
278	432	349	895	547	C	LINE/Tad1	CCCCCGCGATTATCACCATAACCACATGGAAATCCACAGATTTTCGTGTGGCAGCATTATCAGTGACCTCGCTTTACCTAGCTGGAGCATCATCAGACCAGATCCGCTCTTTTTCGTTGTGCGAATGGTGAAAAAGAGATTTCGGACCCCCTGAAGCAGCCCCTGGGTACGGACTTCAGCACCACCCCTCAACAACAACCACCTCAATCATCGAACTCATTTCATTCCCTCCCTTAATCGACCAAAGTAAACCTATCCCGAAAAGCCGATGGCCCCACGCACCTCTGCTGTGAAGAAAAAACCAATCCCTCTGGACAAACCCTCTCTCCCGGTGCTCACGTCCAGCAGACATGCTAACGCAGAGCTGCATACTCAACGCGACGCACAAGAAACAATGCA…
279	433	1	576	576	+	LINE/Tad1	CCTCTGGATCATATCTCACAACCTGAACCACAGCACCACCACCCTCATAATGTTATTGAACACAGCAAACGTAAACACAGACATCATGCTCATCCAAGAGACGAATGTCAAAGACCCCAAGTTTGCTGTCACTCACCCTGATTTTGTTTTACTTCTTCCCCCTTGTGCCCACCACATGGTCAACCGCAGTGGCGCGTATGTCTCCCAGCTTAATCCCCACGTCTGAGTCACGCCCAGGCCAGATGTCAGCGGAGACCCCGACCTCCAGGTCCTAGAGGTCAGCACCGACCTCATCCCCTCTTTTTACCTTCTCAACATCTATAATGAATGTGACCCCACTACCAAAACCTACACTATCCCCCGCATGCTCACCCCCCTTACCCTCCTGCGTCGATGCGT…
280	433	580	4003	3424	+	LINE/Tad1	GGCTTCCCCATCGATGGCAAGGGAAATAACAAACTGGGCCATCAATGAGGGAATAGCCACAGGTTCAGACCATGAGGTCATCGGGTTTCAACTAAACTCTCTACATCCAGACCACACGGCAGCCCCCCTCGCAACTACTCGTCTAGACTGGAACAAAACGGACTGGGATACATTTACCAAGGAGCTCCAGCTCCTCGCAGAGGCCAGCCACCCATACTGGACACACCTCCGCGCCAACCCCTCTGCAAGCAACCTCGATGAGTGGGCCGCCCTCCTCCGTGACTCCATACAGAGTGCAGCGTCCAAGGCCACCCTGACCCTATCACCCACCCCAGGCTCGAAATGGTGGTGGCCTAATGAAATCCGCCACACCCGCTGTGAAATGACCACCGCTAGACG…
281	433	4279	4679	401	+	LINE/Tad1	AAGACACACAGGGGACGAGGGGAAGAAGGAGAGGGAGTCATGGAGGTGAGGGACATAGGGAGAAGTGCAGGAGTAGAAGGAGTAGCGGAGAAGGGAGTGAGGAGAGACGGGGGGGGCGGTGGCCCAGCGGAGTTATCTTTTTCTTTTCTTTTCTTTTATCTTTTGGTTTGTGGAGGAAATCAAGGTGGGAAAATGGCTAAAAATGGGTGGGGAAGGGTGGAGGATAGAGGGGAATGACCTGGCATGGTGGCCCCTGAGTGCACAGGGCTCCTGGAACTGACGACGTGAGATGGATTAAGACCCAACAAGATGGGAGACTACACTGCCAAACCCTCATAACAGCTCTGGGTCTTACCCAGTGGGGACCTGGCATTACACCCAGGTCCTTAACATTGTATT…
282	433	4745	6907	2163	C	LINE/Tad1	GCAGCACTGGCAGTAGCCAGGGAAGTGACAAACTGGGCCATTGATGATGGCATTGCCACCTGTTCAGACCATGAGGTCATTTCCTTGCAATCAGACTCCCTCCACCCTGATCTCTACACCACATCTGCCACCCCCTGACTGAACCGGTGCAGGACAGACTGGCAAGTCTTCACAGACACTCTAAAATGCCTGTCCGACACCACCTACCCCCACTGGACCCATCTCAGAGCCAACCCCGCTGCACAACACTTAGACGAATGGGCAGTCCTTCTCAGGGACACCATTCAATCTGCAGCCAAAGCTGCCACTCCGGTGACAGACCCCACATCCCGGTCCAAGAGATGGTGGATGGTGGAACTCGACCAAACCTGCAAAGCTATGACAGGTGCCCATAGACAC…
283	433	6913	9602	2690	C	LINE/Tad1	ATGTGGAAATCACCAGATTTTCGAGTGGATTATTGTTCAGCGCCCCCAATTTACCTATCCACAACATTTTCAGCCCAGGCCCGCTCTTTTTCAATGCGTTACATGGTGAAAAAGGGATCTCTGGGCCCCTGAAGAAGTCCAGCAGACAGGTCATCAACACCCCACCCCACACACAACAAAAACCATTAATCTTCCAGCAGCATCTTTATTGCACCCGCAACATCTACCTATCCCGAGATTCCCATGCCTCCCTGCTCCTCCATTGTGGAGAAACACCCTCTTCCTCCCAACAAACTGCCCACATGTGACCTCGGTAGCAGGAAACATGCTAGTGAAGAGCTGCACCACATGTAGGCACACAACACACATGGCGACGTGATGCATGTTGCCTGTGATGTC…
284	440	35	2004	1970	+	LINE/Tad1	CCTATTCTTGGACATATGAGGTGCGTTCGACAACATTTCTTCAGACAGACTTCTCGCGACGATGTGCGAACTGGGCTACCCTCAAGCGGTGACATCGTGGTGCTCCTCCTTCCTGAACGACCATTCCACCGCCCTCTCATTCGACGGCAGAACAGACACCCAGTGACCACTCAGAACCGGCATCCCTCAAGGCTCCCCGGCATCCCCAATCCTTTTCCTTATTTACCTCCAACCCCTCTTCGATGCCCTACAGAATGCCCACCCCACAATTTGGACACCCAGCTACATAGACGACATCGCCCTTGTTGCACATGGTCCCTCCAGAGAGGACAACGCCAGGGAACTCGAGTCCACCGCTCGAACCGCCTTTCGCCGGGTGCAGCAAAACGCAGTAGCCTT…
285	440	2257	2686	430	C	LINE/Tad1	CCTGCCCCACTGCGTTCTCAACAAGCACGCTGAAATCACTAGATTTTCGAGTGAAATCAGGTTCAGCATGCCCAATTTGCCTTACTGCATCAATTTCAGATCAGGCACCCTCTGTTTCAGCATTCTACACGGACAGAAAGGGATTCGCAGGCCCCTGCAAGAGACCTGCAGTGCGGCCATCAACACCCCACCCAACAACCACCAAAAACCATGCTTATTCCAGTGGAATCTGTGTCACGCCCGCAAAAAGAGACTATCCCGAAACCCCAATGTCTCCCCGCCCTCCCGTGGTGGGGAAAACCCCCCCCTCTGGAGCAAAACCTCCCCCTTGCAATGCTGCAACAGAAAAACATGATAGTGCAGAGCCGCAGCCCCTGCAGAAACGCGACGCATGCGCCG…
286	440	2797	3305	509	C	LINE/Tad1	AATCAAGCTACGATTCGTCAAACCTCCCACCTCTGCTGTGGCCCTGGCCAGGACCTCGCCTGGGCCATCCACAACACAGCCCATGACCTTCACGAATTTGGCACTTCCATTACGATTGGCTGGGTCCCAGGACATACCAACGTCCCCGGGAACGAAGCTCCCAATGAACTGGCTTGACAGGCGACCACAGTGCTGCCACACGACAACAACCATATCCCTCACCTGGATATGGTTCCACACTCGAGAACAGTACACCAAAGACTGGGCTACCTGGTTTAGCTCATCCTCTCAGCCACGAACATATGCCGCTACACAACACTGCAAGATAGATGCAGCCTACACCGACAACCCCCACTGGATATCGACTGTGATCCTGGGTCTTCACACGGGCCACGGATA…
287	442	312	2012	1701	+	LINE/Tad1	TATCACTCGACTACCCCCCCCCCCCCCTGCGCTCTCAACAACCACCCGGCAATCGCCAGATTTTCGAGCGGATTATTGTTCAGTGCCCCCAATTTACCTTTCCGCAACATTTTCAGTCCAGGCCATCTCGTTTTCAATGTGTTACACGGTGAAAAGGAGATCTCCGGGCCCCTGAAAAAGTCCAGCGGCACGGTCATCAAAACCCCCCCCCACAACCACCAAAAATCATCGATTTTCCGGCAGAATCCTTGTCGCACCCACAAACACTACCTATCCCGACATTCCGATGCCTCCCCGCTCCTCTGTCGTGGAGAAACACCCTCTCCCTCCCGACAAACCACACACACGCGACCTCGCTACCAGCAAACATGCTAACGCAGAGCCTCATGACATGCATGC…
288	442	2606	3649	1044	+	LINE/Tad1	CAGTGTGATGATAGCACTGTGCTCAGTCGAAGAATACAACGCACTCAAACGGACCAAGGTGGTGGTACTCTTTGAGCAGTGCAAGGTAAGGGAATTCTTTACCGCCCAGTCCGCTGACCAATGCCGCAGATGTCAAACATTTGGACATCACCATGCCACCTGCACCGCAGACTGAGGACCTACCTGCGCAATGTGCACGGGCGTCCACCCCACTGATTACCACCAATGCGCAGAATGCCCAAGCAGGAAAGGCCGATCTTGTACGCACACCAAATATAAGTGTATCAACTGTGCCGACGCCGGACACAGCGACACTGCGAATGCGGCCTATAACACCAAATGCCCTGTCAAGATCGCCGCTGTTCGAGAAGCATGGCAAAAGACCAGACCTGACCCCAC…
289	442	3654	5747	2094	+	LINE/Tad1	GCGGCTCCAGCGATACCCAGGGAGGTGACGAACTGGGCCATTGATGACAACATCGCCACTGGCTTAGACCACGAGGTCATTCGCTTTCAATTAGACTCCCTCCACCCCGACCTCGACACCACATCCACCACCCCCCACCTGAACTGGCACAAGACTGACTGGGCAGTCTTCACACACACCCTACAACGGCTGTCTGACACCACCTACACCCGCTGGATGCATCTCAGAGCCAACCCCACTGCACGACACTTAGACGAATCGGCAATCCTTCTCTGGGACGCCATTCAATCTGCAGCCAAAGCCGCCACACCAGTGTCAGTCGTCACGTCCCGCTCAAAGAGATGGTGGACAGCGGAACTGGACCAAACCCGCAAGGCTATGACCAGCACCCGTAGACAC…
290	444	29006	30144	1139	+	LINE/Tad1	TCGGAAATCACCTTGGAAAAGTCATTCAGAAATCCCTGGCCAACAACAAATACGGCATCGAACCAATAGTCAGAAGTAACAACACAACGAGAGGATAAGTCACAATAAAAGACAAAATAAAGGCCATCGAAGAAGCAACGAGAGCGAGCCAAACCACCAACACCATATTCACAGATGGATTACCACTGGACAATGGAAATGCAGGATGCTCGATGGTGTGGCGCACCACGGATGGATCCTGGAGAGCCCACAAAACCCATTTGGGGGCAAACAAAGAAATCTTCGACGCAGAACTATTTGCAATAGCCGAAGCACTGAAGGTAGCGAACCAAAAAGTAATAGGAAATCAGGCCACCCACACAATCAGTATCTATACGGACCCCGCCGCGGCCCTCCAAA…
291	445	69435	69941	507	+	LINE/Tad1	GACCGTCCGGCAGCTGCCAAATCCAGCCGCACACCCCTTCATACGAAGGCCTTCTTATATAGCGACATATCCCATAAGGCGTCGGCAAGCTTAATACGCGATACCAAGAACGGTACCAGATTAGAAGAGAAGAAAAGGAGGCGGAGATGGCGGGAGCAGCGATTGTGGAGGACGAAGAGGAAGTGGAATCGGAGGATGAAGAAGGCGAAGAAGATGGTGTGGAAGATTAGCGGAAAGAGGCAGCGCTGGCGGAAGCAATGACGTGGTTGGCTGAGATGTTCGGGGACGAATTGGCATAGAGTTGGAGTTGGAGTTGGAGTTGTTTGTTTGTTTCTTATTTTCATTTATATTTTTATATTTGGGCACGGATAGAATAGGGGAGCGACGGGGACAGGGGAT…
292	448	20041	21123	1083	+	LINE/Tad1	GCCCTGGCCCTGGACAATGGCTGGTAAATAGGATAACCGAATACGAAGGCCGGATTATCAACCTGGGACACAAGGTACAATAAAATTGGGTACCCGGACACGCCGAGAGAGAAGGAAACGAAGTTGCCGACGGCGCAGCTAAAGCGGCAGCGGCCACCCCCGTACAACGCCAAAACCGCCGCCTCCAGGCACGAGAACACTTCACGTCCCTATCCCACCTGCACCGATACAACACGGAACGCAACTTGCAAGGCCAAGGAAACAAAAGAATGGTTAACGCAGATGCTGGATAATGACCCAGGGTACACCCTACCTCGCCATCAACATCCCGATAAAACGATCGTGAAGTCACCAAACACCTAGCTATTCGATATTATCAACTAAAGATTGGTCACGCGG…
293	448	215985	216195	211	+	LINE/Tad1	GGAGAAGTGCGGCGGAACGTGTGGTGAAGAGCGTACTGTAAATACCGGCGGGCAGCGAGGCTGACCCAACGACGGCACGATGAGACTGAGGCAACTGTACGAACAGAGACTGAGACAGGACGGCACGAGAAAATGTAAAGGCGGACAAGAATGTAGTTAGCATACCCCAATCTGGGGTCATAATAGTAATAATAACATGACAAAATCAAAA
294	452	52447	53244	798	+	LINE/Tad1	AAATCGCCCAGGATACTGCCTACCGACAAACCAACAACCTGACAAAATCGTAATGACTGCAAATAAACGACTGGCAACCAGATACTTCCAATTGAAGATCGGACATGCCGTGATCAGCACACACCTTAAGCGAATAAAAACCATCGAAGACGATAGATTCTGGTGGTGTCACTCCGGGGAACGACAGTCGGTACAACATCTGGTGAGAGAATGTCGATAATGGAGAGAAGCCAGAGAAAGGCTAAAGAAATCGGTTAAAAGACACCTATGGCAACACTACAATACGAAGCACCTATTCGCATATAGAGAATCCACGAAGCCAATACTGAGATTCCTGGAAGAAACGGAAGTAGGAAATAGAACAAGGGAAAAGGAGATGGGAGAGAAGAAGAAAGGGAT…
295	455	181	3845	3665	+	LINE/Tad1	CGCCCCATATGGCGGAGGAAACAGTTACCTGGGCAATTGATGATGACAATGCCACGGGGTCTGACCATGAGGTCATACGCTTCGAGGTACACACAACCCACCCAGATGCTGAAACAACTCCCCCGACAAACTGACTGAACTGGAAAAAGATGGATTGGGAGCTGTTCACTGAAACCCTCCGTACCTGTTGCTCAGCCCTCTCACCAACCTGGACACACTATCGTAACCACCCCACCATGGCCAACCTTGATGCATGGATGGAGTCAATACAGGATGTCATCCTTGATGCTGCAATGACGTCCACCCCCACACTACAAGTGACCCCCCAATCGAAACGATTATGGACCCCAGAAGTCACCGCGGCAAGAAAGACAATGACCAAAGTGAGACGTAAGTGGA…
296	456	35986	36725	740	+	LINE/Tad1	AACTTCGCACGGGCCATGGACACTTCGGATCTTACTTCCACACGATGAAATTCAGACCTCACGATAGTTGCGCTTGCTGGAATAGACCCCAGAGAAACAGCCAATCATCTCCTATTCCACTGCCTCCGCTATTCGAAGGGTAGGCTGGTAGCAGCCAAATCTAGCCGTATCCCCAGGCTCCATGCCAAAGCTTTCTTGTACAGCGGCATCGCCCACAAAGCACTCGCGGAGCTCATTCGAAATACCTAGATAGGCACCAGATTCGAAGGTTTAGAGAAGGAAAAGGAAGCAGTAGTAGGAGAAGGAGAAAGGAATGGCGTACTTGGCAGAGGACAGGATTGGGATGAAGAAGAGGTGGAGGATGACTTCGCGGAGTTGGCGGGGGAATTGAACGAGGCA…
297	464	90605	90862	258	+	LINE/Tad1	GCTGTCCTAGAATTCCTGGAACAAACAGAGATAGGCAGACGATATGAGTAGGATACCATAAAGGTACCACTCTCTTCTTTCTTTATGAGATGCTACGGCTTTCTTTCTTCTTTTCTTTCATTTTTCTCTTTCCTTTGTACGGCGGTTTTTACGGGATTAGGAGATTAGGGGGCCTCACCAGGTGGCTCAGACCACGAGGACGGGATTTGGATTTCTTTTGTCCTGCATGGGCCTTTCAGGCCTCGGTCAGCGTATGAT
298	465	97129	97852	724	+	LINE/Tad1	AAAAAACCACCAACTTTTTCGTGTAACCTTCATGATTCAGAAAATTCACAGCCCTCTCACGGCTTCATTTTTGCCCCCCCCTCAATGGCCCCACAGACCACAGTGCCTGTAGGTACTGCCGAGTTGCTGTACCATGGTTATGCAAAGGGCTTGCTTAGCAAATGTCCTCCTGCTGCTTGTACAGCTGCATGAACCCATCTAGCAATCTCCCCAGTGCCACAGCTGCAGATGTCTTCTCCACCCTGTGCATGCTGGCCACCCCAACACCCCTCCTCATGAAGCTGCAGCACTCACAGCATGGGCCACTTGAGTTCAAGTCCCCACGATCAACCCCAACCCACTTGCTTGCTACAAGAGGTAAATGGCCCACTGATGTCTCAGCAGACACCTCTGAGTGTG…
299	466	2	475	474	+	LINE/Tad1	CAATCGAAAGCATAACACCAATAAACCCCAACAAAAATGCCCAACCTGCCTTACGCCACAACAGCTGGATATCCTCACTCCCGATTGGCACCCTTCTCCTCTACTCCGATGGCTCCAAACTTGACACTGGACAGGTCGGGTGTGGAGCAGCCATATACGAAATAACTGCAACCGGGCTACAACACCTCCGAACACACAGCTGCAACCTAGGGTCACGATGTGAGGTCCTTGACGCAGAACTACATGCCATCTGCGAAGGCCTACATCTGCTCCCAGACTACCCCAAAACATACCTCGCACCAATTTATATCTGTGTCGACACCAATCTGCAATACAGACACTTGCCGACAAAAACCTAAACCACCAGTTTGCCCACGATGCCCTCAACCGAGCTCAAAA…
300	468	147	4156	4010	C	LINE/Tad1	TGGCTAGGGAAGTATCGAACTGGGCCACAGACAATGGCATCGCCACAGGATCGGACCATGAAGTAGCCCACTTCAAAGTGAACTCCCTCCACCCAGTCTCCACTGTCTCAACCACCACTACCCACCTGAACTGGTGCAAGATGAACTGGGATACCTTCATCACTGAGCTGCAAAACCTCTCTGCATCATCCTACCACTGATGGTCCCACCTCTGAGCAACCCCGTCCGCCCACCATCTTGATGAATGGGTGCCCCTTCTACGTGACACAATATGAATGGCAGCCACAGCTGTGACACCTACCCTGACCACCTCGCTGTGATCGAAGAGATGGTGGACAGAGGAAGTAAGTAGAACACAGACAGCCATGACAGGTGCTGGTCGTAAGTGGAAACAAACAT…
301	468	4174	5154	981	C	LINE/Tad1	GTAGTACTTTTTGAGCAATGAAAGGTTACAGAATTCTTCACTGCTCGATCTGCCGACCAGTGCCATAGGTGTCAGAAATTCAGACACCACCATGCTACTTGCACAGCTGAAAGCGGACCTACCTGTGTGATCTGTGCAGCCATCCACCCCACCGAATACCACCAATGCGCTGAATGCCCAAGCAAGAGAGGCTGCTACTGCCTGCACACCAAGTATAAGTGTGCGAACTGTGTTGATGTGGGACACGCTGACACTGAGCATGCCGCATACAATACCAGGTGCCCTGTGAAGATGGCAGCAGTATCAGAAGCATGGCACATAACATGACCCGAGCCAACCACCACTGATGACATTCCCGCTGAAATCAACACCATCGCCGATACCACCATGACTGCTGAT…
302	470	36	1708	1673	+	LINE/Tad1	CAATGGTGCAGTCTGTTGCTATGTATGGTACTGACATTAATGCTGCCTGCTGATATCCCTCTCGCGATGTCGGCTGCATCACCAGCCTCCAACTGATCCTCAACCATCAAGCCCGAGTGATCACTGGATGTTTATGAACAACCCTCCCTGGCTTCCTCATGGCAGAAGGAGCCACTTGCCCCGCTGAAGCCATAGTGTGAGGTCAGGAAGCATGCTTTCGCTCATGAAGTCTCACTCGTGTTGCACTGAAGCCAATGTCATCCCTTCGCCAGGCCACCTCGACTGAAGACATTATCTGATGCCTCACCCAACATGCTGCATCATGGTGTGGATTCTTGGAGGTCGAAAACATATGCCAACCCTCACCGTCAGGCTACAAACCTGGTGACATCATCATTG…
303	479	1026	1721	696	C	LINE/Tad1	CCCCCCTGCATTATCAACAACCACGCTGAAATCGGAAGATTTTATTGCGGATTACTGTTCGGCAGCCCCGAATTACCTATTCGCAGCATTTCCAGACCAGGCTTACTGTTTTTCATTGAGTTTTCATCGAAAAAAGAGTTTTCGGGCCCCTGAGAAAAGCCCCGTGAACATGGTTCCATCAACACCGCACCCCACACACATCAAAAATCATCATTTTAATCGTGGATTCCTTGTTGCTATGGCAAAAATACCTTATCCCGAAACTCCGATGCCTCATCAATCCTCCGCTGTTGAGAAACAGCCCCTCCCCCCTGACAAAGCACCCCCTCGGGCGCTCGCGATGAAGAAATGCGCTAACGCAGAGCCCCAAGCACCTGACGCGTCCGACGCGGCCATGCA…
304	480	10	259	250	+	LINE/Tad1	CTGATTTCTTTTGTTTGGGAGGAAATAAAGACGGAAAAATGGTTAAAAATAGAAGGGGACAGGTGGAGGAAATTGGGGAACGACCCAGCGAGGTGGCCTCCGAGTGCACAGGGCTCCTGGAACAGACGACGCGAGATGGACTGTGAACCAAATGATACTTGGGGGACTACAACCCCACACATGAAGACTGCTCTGGGGCACATCCCAGTGGGGACCTGGGGTAACAGCCAGGCCCTCAAGTATGTATTTA
305	480	328	2984	2657	+	LINE/Tad1	ATTACCTCTTCCCCGACAAAAGCCCCTGGCCCTGACACCATCACATTCGCATGCCTTATAAAAGCATACGACGCGATCCCCTACACGTTCAACGCGCGATACTCGGCGCTGGGCGAGAAAGGATACCACCCAAAGTGCTGGCGAGAAGCTACCATGATGATCATCCCAAAGCCAAATAAGCCCGATTATAGCGCAGTGAAGGCATACCGACTGATCGCATTGCTTAACTGAATGACAAAGGTTTTGGAAAAATTGATGGCGATGCGACTCAGTCTTATGGCGGAGTCACACGGCATCCTGCATGCAGATCAAATAGGCGGGCGCCCTAAATGCTCGGCAATCGACGCTGCGATCGCACTAATGCACGAAGTCGAAGCGAACACTAGCCGTCACCTAGTC…
306	482	7002	7414	413	C	LINE/Tad1	CCTGATGAAGACCTGCCGTCGATGGCATGAAGCACGGGAAACCTTAAAGAACAACGTCAAAAGACATCTACAACATCATCACTATCTACAGCACCTCTTCGCAAACAGAGATGCTTCCAAGCCACTTTTAAGCTACCTGGAAGCCACCGAGATCGGGAAAAAAAACTGCCGAAAAGGACATGGAACAAGCGGAGGAAGAGAGACGCAATGTGGGGATGGTGACGTTAGATGGAACGTACTAGAAGAAGATCCGGACGAAAGAGAAAGAGAAGTGGAACGAGAGCAAATGGCAAACAGACTGAGAGAGGCGAAGGTTTTCACAGCAGGCGCGGTGGAGAAAGCAGAGGCGGCTGGGGTAGTGATTGAGAACAGATAAGGAAGACGCAGAAAGGCAACGGA…
307	483	54877	55135	259	+	LINE/Tad1	CATGGCGCTCGATGTAGGCTTTGGCCAGATCACCGGGGGTGTCTCATTTGTTTATTATTTTAATTAGGCTGTACCGGAGCCAGAGAGGGGGTGCCACAACTGATGTCTTTATGATTAGTTAATCATTTAGACGGTAGACAGTACTAGCGGGGACACACGTAAGGCCCCTAACGTGGCGGGCCCTTCGGGCAAGCGGCGCCATATTCTAATTAGAATGCATGCTCCACTATAGTAAATATGTTGATTCAAAACAAACAAA
308	483	82066	82525	460	+	LINE/Tad1	TTCCTCTACCGCGGCATCGCCTACGAAGCCCTTGCGGAGCTCATCTACGATACCAGACTTGGCACTCGCTTAGAGCGAGCCGCCAAAGAAGAAGAAAGAGAAGGACGAGGAATGGAGGCCGGAGGAGACGAGCTGGAAGCTGGCGGAGATGACCTGGAGGAGGACGTAGAGGAATGGGAGGATGATGAAGTATCGGGGGGTTGGGGGGGGGGCAGCGGAGGTACTGCCGGAGGAAGCGTTAGAAGAAGCGGGAAGATGGTTGTACGAGGAATTTGGAGACGTAGAAGGTGAACTGGCACCGGCGGGCCGCGATGTCGACGTTAAAGTTTAGAGGGCAGAGAGATCACGAAGATTGTATAAACACTAGATTTGAATTGTATAAAGCACGCAGGAAAGATT…
309	486	61876	65390	3515	+	LINE/Tad1	CGACTCCACTTCCACTTTTTAAAATTCAAGCACAAAACATCTTTTAAAAACCCAAAAGAGACGTCCTCCCGCCTAACAATGATGGAGGACGCATTTAGTCATCCAGAAGACGAAGGAGGCCAAAGAGGCCCCGGAACTGAACCTGGATTCGGCGAATATCGCGAGAAAGCTCAAGAAACCGCCTCGGACTTCGAAGACGAAGAAGAAAACGAAGAAGACGCAATGGAGATCCAGACGAACAAAGAAACCAACCAATCCAGCCCTAAAATCGAAAAGCCAAACCCCGAGATCATCGAAGCAAACACCCCGGCCAACCTGGACCCAAGCTCAAACAACCTGAACCCCCCGCTCCCGAACCCTCAACCAACCAACCCCGAGACCCCTGAGAACCCCCCACAG…
310	486	77346	77749	404	+	LINE/Tad1	CGCCTGAAAAAGAAATGGAGAAAAGCGATGAAGAACGGGATGTGAATATGGGATGGGAGGAATTAGAAATGGAGCACGAAGAGGCAGAGGAACAGGAGACGAGAAGGAGAATGACAGAATAAATGAGGCGGAGCGATTTATAGCGGAAGTAGTGGCAGAGGAGGAAGCTGTCGGATATCTTGATGAGAATGGTTAGGAGATATAAGAAGAAAGGCACAGAATAAAGTGCGGCAGGACGTGGTGAAACGAACTGTCAATACCGAAGGGCAGCAAAGCTGACCCAACGATGGCACGAAGAGAAAGGAAAGAATGCACCGAAGAAAAGCAGAAGAAGAAAAAGGACGAAGAAAATGTTGTTTAGCATACCCCGATCTGGGGTTTTAATAATATGACAAAATC…
311	492	55878	58380	2503	C	LINE/Tad1	CTCATGGACATAAAAGGAGCTTTCGATCACGTGCCTAGAATAAGACTCACAAAACATCTGGAGGAGCTGCAAGCAGACCCACAACTGATTTGATTGACCGACAACTTCATGAGAAGCAAAAAAGTGTCACTATTATATAAACGGACACGAAATGGCAATTAAACCGACAAACTCGGGCATTCCTCAGGAATCCCCAGTATCCCCGATCCCATTTTCAATTTATATCTCAAGAGTCTTTGAAGAAGTGGAAACCGAGACTTGAGCAGTGGTAATGTGTCCTTTGTAGATGACCTGTCATGGATCGCCTCAGGTGACAACGTATCAGAAATCACTATCACACTGGAAAAGTGCGCCGAAATAGCAACAAGATGGGCTGAACAAAATGCCGTGGAATTCGAC…
312	496	98	1679	1582	C	LINE/Tad1	CAACCTGCACCCTGTACTGTGCATGAGTCATATCTAGGTCTGATTTCGGATCCGAGATCTGGTGGAAAGGGCAGAAAGGACTGGCTCGCAAGCTCCCAACACACCAAAACTCCGCCCTCTGACCAATACTGAATGCCTTCTGCACAACTCCAACAATCGCCCTACATAATGAAGCCATGCTCCTGCCCGTCTCAGTCCATCTTAACCATAGACATCACAAATACATCCTCCGTCTCCTTTCCCTACCCCCCTCCCACCCTGTAGTTAGAAGATGCCCGTCCTCTTTCCCCATCCCCAAACACTTTTAAAAAGCCATGTGCCACCCTGCTGAATACGACCACCAATGGAGTACCTCCACCCACCCCCCCTCCTGCCTCATCGAAATGCTCCAGACCATGA…
313	496	1738	1997	260	C	LINE/Tad1	AGGAGGCATTTATACTTTCTTATGTTGTGGAGGCAACAAAGGTGGAAAAATGGCTAAAAATGGCAGGGGAAGGGAGGAGGAAAGGGAGGAATGACCCGGCGAGGTGGCCTCTGAGCACCCAGGGCTCTTGGACTAGACGACACGCAGACAAACCTGACTGCAGGGACTTGGGGGGCTACACCCCCAAACAAGAAGCATGCTCTGGGGCAGATCCCAGTGGGAATCTGGGGTATCAGCCAGACTCCTAAATGTTGTATATA
314	498	66331	66969	639	C	LINE/Tad1	GACCAATAAGAGCAAAGCGTACATTCCGCGAGAGAAGACCGGAATAAGGAAACTCCTGAAGAACGAGAAGAAGGAGGTGGCCTCCCGCTTCTACCAGCTCCTCACAGGACACGCGGTGATTGCTCCTTACCTCAAGGAGAAACTGAAGAAGACAGAGTTCGATGCCTGTTAGTGGTGTGAGTCCGGGAGAAGACAGACCAGGAACCATCTGTTCAAGGATTGTGCGAAGTGGAAGGCAGAGATTAAAGATTTATGGAAGAGAGTAGGAAGAGACTCGGGTGAATACGGGCAAAGTGGAAGCCAGTCTTGGAACTGTTCAAAGAAGAGAGGGCGGAAGGCGCAGTACTAAAGTTCATTAGAAGGACAGTAGTAGGCAAAAAGAATGGCGCGAAGGAGCCG…
315	499	9275	9599	325	+	LINE/Tad1	CTGGTGTTGCAGTAATGGAGACCGCCAAACGGTGAAACATCTCATAAAAGAATGCCGAACCTGGAAGAAAGAACGAGAAACATTGAAGAAAGAACTCAGCCAGTCAGCTTGGAATCACCGAAGCATCGAACATATCTTCGCCGACCGTAAGAAGACGAAACACATCCTAAACTTCCTGGAGAAAACGGAAGTGGGCAATCGCACCCCGGAAAAAGAAAGCGCCGATAAAGAGGAGGAAAGAGATGACAACTGGGGATGGACCGAGGAAAGAGAGTAGTCAGAAGAGAACGAAGAAGAAATGAGTAAAGATGATAGCAAGGGAGAA
316	507	266936	267560	625	C	LINE/Tad1	CAACTCGGGGGAAAGGCAATCGGTACAGCACCTCATGAAGGATTGCCACCGATGGAGAGGAACGGGAAACCCTCAAAAAGCCGTCAAAAGACACTTGTGGTACCACCACGATCTGCAGCACCTCTTCGCAAACAGGGACGCTTCCAAGCCAATTTTAAGCTACCTGGAAGCCACTGAGATCGGGAACAGAACCGCTGAAAAATATATGGAAAGAATAGAGGAGGAACAGGATGAACTATGGGGATGGGGGGTACTACTACGAGAAGAGGAACCAGTGAAGTACGAACGGAATATGGAGCAGAGAATAATGGCAGAAAGGATGAGAGAGGCGGAGGAGTTTATTGCAGGAGTGTTGGTAGAAGGGCAGGTGGGAGGCTTCTTAATGGAGAATGGCTAGAA…
317	507	268764	269042	279	C	LINE/Tad1	CAAATGGAAAGCCAAATCAAACGCCTCCACACAAAATTCAGCACGACCCCGGCGAACGTTAGATTATAATTGCCACAGTATAGTCATCAGCGTTCTTCGGCTCCGAGATTTGGTGGCACAGCCAGAAAAACCGGGCAGATGACATCCAGAAAATGATAAACCGATCAGCCAGGGCTATCACAGGATGTATGAAAACAACACCAATAGCGCCCCTCATCGCTGAAGCCGGCCTCATCCCAGCCACCGCTCACTTAAATGACCGCCAACGGAAATGCGGGG
318	510	7102	8426	1325	C	LINE/Tad1	TCACAGACAGTCACGCTATGCACAGCGGATCCCCAAACAACCCGAGGGAACCAGAGGAGCCAGAGAGGTGATGCTGGCAACGGGAAAATCAGCGCTCTCCAAAAGACTAATGGAGATAAGCCTAGTGAACGGTGACCGAATGCAGAAGACATACCTCGAAATGGGAAAGACATAATGGAGACATCATGCCAAATGCAAGCGAGTCAGAAGCTATGAAGGTGGCGGAGGAATGGAAAGACCGCGAGGACACCGCTTGGACAGATAGATTCCGCTTGGAGGATGGCAGGGTCGGGTGTGGCATCGCGTGGCAGGACGAAAAACGAGGACTGGATAGGTCTGATCACCCACATTGGAATGAACAAGGAAGTCTACGATGCAGAGCTCTTCGCTATAGAGCAA…
319	510	121115	121814	700	C	LINE/Tad1	AGCTACGTACCGGACACGGCCATTCCAGCTCATTCCTCTATAGAATGGGCTTCCGCAATGATGACCGCTGCTCCTGTCCTAACGGGCCGAAAGAGACCCCCCACCACCTCCTCTTTTCCTGTACAAAGTACCCCAAAGACCGCCTGGCCGCTGCTAAATCCAGTCGCATTCCGCTTCATACAATGGCCTTCTTATACCGCGATATAGCACACAAAGCCCTAGCAGCAACACGAGGATAGGAACGCGTATGAATAGGGCGGAGAAGGAGGAAGAACACCAGGGGATGGATAGGAGAGGGTTCGACGGACGGGTGGATGGCCAATGGGATGGCGAGGAGGATGACGGGAACGATGATGATGAGGACGATGATTTCGATGTAGTAGAGACAGAGTTGTCAGA…
320	510	159689	159893	205	C	LINE/Tad1	CTCTTCGCAGACCGAACGAAAACCCAACACATCCTAAAGTTCTTGGAAGACACCGAGGTGGGCAACCGAACAACGGAAAAGGAGATGTTTGAAAGGGAGGAGAGCAGGGACGATATATGGGGATGGAGAGAGGAAACCGAAGAAGAGGCGGAGAATGGAGAAGAAACTAAAAGGGAAGATGAAGAAGACGAGAGTGAGAATGGAA
321	511	34275	36735	2461	C	LINE/Tad1	TCGCCGGAGCCTTGCTCATGAATATCAAAGGAGCATTGGATCACATCTCAAAAACACAATTAACAAAAAGAATGGAAAAGCTGGAGGCAGACCATCAGATAATTCAATGGACAAATAGCTTCATGTCAGATCGGAAAGCATCCTTGGTAATCAATGGACACGAAAGGGCCATGAAAGAGACAACAACCGGAATACCTCAAGGATCACCGGTATCACCCATCCTCTTCGCCATCCACAGATCTGGAATCTTCGCAGAGATAGAAAAGAAAGTCTCAGATCCACCGGACTGTCATTCGTGGATGACATATCATGTCTGGCTGTAGGGAAAGATGTAACAGAGATAACGAACACCCTAACACAATGCGCAAAAGACGCGAAAGCTTCGGCAAACAGAAATGC…
322	511	38977	39292	316	C	LINE/Tad1	TTGCAGGAGCATTCCTGAAGGACGTCAAGGGGGCTTTCAACCATGTGTCCAGGACATGCCTAACATTATGGATGGAACAACTTGGAGCTGACCCCAGATTGCTCCATTGGCCAAACTACTTTTTAATACAATGAAGGGCCTCCCTGATCATCAATGGACTAGAGAGAGCAATCAAACAAGTAACAACAGGAATCTCAGAGGGATCACCAGTATCTCCAATACTCTATGCAATATATATATCAGGAGTATTTGAATGGGTCAAAGCAGAAAAAGAGAGCATCAGACTATCCTTTGTCAATGATCTCTCACAGGTGGC
323	511	39305	41016	1712	C	LINE/Tad1	GAAGAAGATATCGCATTAATTGAGGAACCATTGGAAGGAAAAGCAGGAGAGATGAAAAGCCACCCGGGGTTCACGTATCAACGTCCGGACGCAATAGAAGGAAGAGGAAAAAGAGTGTGGATCGCGATCAGAAAGGAAGCTCGTGTCATCCCGGAAAGAAGAGATGACCTTGGGGGAAACCCAGATATCATAATAATGGACATTTAAGAAAAACTCGCAATACCCCCGAGGAAAGAGAAGTGGAGAATGCCACTGGAGAAAGGAAGACGAACAAGACTGATCAACATTTACGACCAAAAACTAAAACCGGCATTCCAACGACCAGGAAAACCACGGGTAATACAAAACATCAACTGGGCAGCCAACATAGATGACCAGACTATCATCGCTGGAGACCTC…
324	512	1	1590	1590	C	LINE/Tad1	GCCGCCCCAGCGGTTGCCAGGGAAGTATCCAACTGGGCAATTGACGAGGAGAACCCCACCGGCTCTGACCACGCAGTAGTCCTCTTCCAGATATCCTCCCTACACCCCGACGCGGAACACGACACACCAGAGCCCCGCCTTAACTGGCGCAAAACAAACTGGGACACGTTCACGTCCACCCTCCGCGAACTCTCCGCCAATAACCAACCCCTTTGGAGCACCGTGCACACGAACCCCACCGAACACCAGCTCGATGACTGGGCAGTCCTCCACCACAATATTATCACCACTGCCGCAGCACAGTCTACCCCCGCACTCGTGCTCTCCCCACAATCGAAATGATGGTGGTCCCCAGAGGTGAAACACATGAGAGCGGCCATGACCAGCGCTCGCTGCAAG…
325	512	1595	3300	1706	C	LINE/Tad1	GCCGAAGCGAAGTACTGGCGACTGCGCGCGGAGACTGCAGAGAACAAGCTCATCAAGCTTGGCCACACACTGGCCCCCACTGCCCCCCTCAACCTCCCAACTGCCCATGGCAAGGCCCCCCCGCCTCCTCCATCCTCTTCCAAACCCCCCCACAAGGCCCCCAAAAAACCCCTCCACCCAGAACCAAGCCCAAAACCGAGAACGTATCCCGCAAACCCCCCAAACCCCAAGACATTGTGATCCCTTGCTCGGACCCCCAAGCTCTCCCCAACAGCGTCAAGGTAACCATTGGCATGGCGGTAAACGCCGCCCTACGGGAAGCCAAGGCCCCGGCAACGCTCTCCATTACGACGGTCCGCAAAAACATAGCAGGAAACCTCCTGCTCACCCCCGCTACAC…
326	513	149652	150372	721	C	LINE/Tad1	TAGTGCCAATTGAAGATCGGACATGCCGTGATCGGCACACAACTTAAGCGAATAAAAACTATCGAAGACGATAGATGCTGTTGGTGTCACTCTGGGGAACGACAGTCGGTACAACATCTGGTGAGAGAATGTCGACAATGGAGAGAAGCCAGAGAAAGGCTAAAGAAATCGGTTAAAAGACACCTATGGCAACACTACAATACGAAGCACCTATTCGCAGATAGAGAATCCACGAAGCCGATCCTGAGATTTCTAGAAGAAACGGAAGTAGGAAATAGAACAAGGGAAAATGAGATGGAAGAGAGAAGAAGAAAGGGATGGAATGCTAGGATGGGAATAAATGCAAAGGGAACCTGAGGAACGAAAAGAAGAAGAAAGAAGAAAAATGGAAGAAGAAAG…
327	523	7756	10489	2734	+	LINE/Tad1	AGCAAGGTCACCGCCTTTCACGCCCTCTTCCCCCTGCCCCCCCCCCCGCCCCCCCCCACGCAGAATGCCCAACACTGCAACCCCATCCCATGGGAAACATTCACTCCTGAAGAGGTTAAACAGGCGATCTTCACCTCTTCACCAAAGAAGGCACCCGGCACAGATGGTATAACTTTTGCATGCCTATGCAGAGCATACGAAGCTATCCCAGGACACATCTCCCAGCTCTACGCCACTCTTGGAACAGTTGGCTATCAACCTCGAAGCTGGAGGGAAGCAACGACTGTCATCATCCGCAAACCCAACAGGCCGGATTACAGCTCGATCAAGGCTTACCACCCGATTGCATTGTTAAACTGCTTAGGTAAAGTGCTGGAAAAACTCATGGCTATGAGACTA…
328	526	45290	45702	413	+	LINE/Tad1	CGTCACCTCGTTAAATGGAATCAAGGAGCCACCAGGTGGCTCGGAGTCTTTCTCGATCCAGCTCTCAACCTTGTCGTACATCGCGAAAAGGTCATTGCTAAGGCAAAATCAGCTGAAAAAACGATTGAAAAGCTTAATTCACGAATTCGGAATACCGTCGGCGAGCTCCAGGACTGTCCAAATAGCTGTGGTGCAGTCGACGCTACTGTATGGCACCAAGCGCTGGTGCAATTGAAAAGAAGATGCTACCCGTCAATTCCAGTTAGCCATTAACCGTCTCGCTCGTAGGACGCTGGGATGCTTCCCGTCAACCCCACTTGGCCGCCTCCTTGTGGAGGCAGGCATGATGCCGGCAGTCCCATTACAGAACTACTGACATACGCGTTACGCACAACGCCT…
329	532	13	359	347	C	LINE/Tad1	GATACGGGCAGATCGGTAAAATTGGGATGCATGGAGGGTCACGTCTTGGTTGCTGCCGTTGAGGATGCTTGGGAAAAGCGGAAGGTCGCGGCAGCCCTCATGATGGATGTCAAAGGGGCCTTCCCCACTGTCAATAGAGCATGCCTACTCCATAAGATGCGAGGAGCACAACTAGACGAAAACCTGGTGACGTGGGTGGACAGCTTCATGTCTGACAGGTGGGTGGAAATCACTATCGCGGGAGAAGCGGGGGAAGCTATCGCTACCAACACAGGCTTGCCGCAAGGCTCGCCAGTGTCCCCGATTCTTTTCCTCATCTACATTGCGGATTTGGCATCTCTTGTTGA
330	538	2575	4213	1639	C	LINE/Tad1	CCCCCCCCCCCCCGGCCATTGTCAACAACCATCCGGTAACCGCGAGATTTTCAAGCAGATTATTGTTCAGCGCCCCCAATTTACCTTTCTGCAACATTTTCAGTCCAGGCCATCTCTTTTTCAACCTGTTACACAGTGACAACGAGATCTCTGGGCCCCTGAAAAAGTCCAGTGGCATGGTCATCAAAACCCCCCGCCAACAACCACCAAAAATCATCGATTTTCCAGCGGAGTCCTTGTCGCACCTGCAAACACTACCTATCCCGAGATTCCGATGCCTCCCCATTCCTCTGTTGTGGAGAAACACCCTCTCCCTCCTGACAAACTGCGCACATGTGACCGCACTACCAGCAAACATGCTAGCACAGAGCCGCACGACATGCAGGCTCGTGACACAAA…
331	538	4243	5492	1250	C	LINE/Tad1	CCGCCTCCACCCTCCTCTGCCCCAACCTCCCTCCCACCACCCACACCCCCCACGTGAAAACCAAGGCTAAAACCCCCGCCCTGAACTGCAAACCTCCCTGCCCCCAGGACATTGTCATACCATGCTCGGACCCCCGCGCTCTCCGCGACAGCGCCAAAGTTGAAATCAGTCTGGCAGTCAACACTGCCCTCCGGAAGGCCAATGCCCCTGCCACAGTCGTGATTACGACAGTTTGCAAGAACATGGTGGGCAACCTCCTCCTCACCCCATCCACCCAGACCCAAGCCATCAACATCACGACCCACCTCCCAGTCATCAAGGACGCTGCCATGGTGGTCAACCCATCCCTCTTGCCCCCACGCCTCAACGAGAAGTGGCATAAACTGGCTGTACATGGGA…
332	538	6846	9125	2280	+	LINE/Tad1	GCCCAAAAGAAGTGATGGCGTGGTGCTCCTCCTTCCTCAGTGACCGTATGACAGCACTATCATTTGCCGGGCAGACAGATCGACAGTGCCCAATCCAAACTGGAATCCAACAAGGATCCCCCGCCTCGCCCGTCTTATTCCTAATCTATCTCCACCCCCTGTTTGATACCTTCCACCGAACATACCCCACCATCTGGATCCTGAGGTACATAGGCAACATCGCCCTTGTCGCCCATGGCCATACAAGGCACGAGAACACCCGTGCCCTAGAAGCGGCTGCCCGCACAGCCTTCGCATGGGCACACGAAAACGCCGTAGCATTCGACAACTGCAAGTCGGAATTGCTGCACATTCACCATGCTCGCAATGACACCCACTCAGCAGCCACAGACGTTCGCC…
333	538	9412	9648	237	+	LINE/Tad1	TTTACATTCAGAGGAAATAAAGGCAGAATAATGGATTAAATATGGGAGGGGAAGGGTGGAGGAAATGGGGGAACGATGCAGCGAGGTGGCCTCCAAGTGCACAGGGATCCTGGATCAGAAGACGCTAGATGGACGAAAGCATTATCAGTGTTCGGGGACTACAACCCCATACCCAACGACAGCTCTGGGGCTTATCCCAGTGGGGACTCAGGGTAACAGCTGGTCCTTACCCTTGTA
334	538	9718	10042	325	+	LINE/Tad1	TTTGATGGCCATACAGACACCCAACGACCTATCAACACTGTCATTCCCCAGGGCTCGCCCACCTCTCTGATCCTATTTTTAATATATCTCCAACCCCTCTTCGATGCCCTCTAAACCACCCACCCAATGCTGTGGACGCCGAGCTACATCGATGACAAGACATTGGTAGTACACGGCCATACACAAGAAGACAATGCCCGGGCCCTGGAGGCTGCCGGCCGCACAGTATTCCAATGGGCCCACAATAATGCCGTGGCATTCGATGACACCAAGTCTGAATTACTACATTTCCACCATGCATGCCAGGACACCACCCCCGACACCA
335	539	106399	107181	783	+	LINE/Tad1	AAAAAATACAGCAATGACTCAAAGCAACCCACTGGCCCCCAGCAAGGAAACAAAAGACCCATGGCACAGATACATAGTCATGCAAAGAGACTCGGAAGCTCTCAAACCAGAAACTTCTATGATCAAAACTCTGATCCACGAACAATCTACACTTAACAACCAATGGAGTCCCAGAACGCATTCGCATCAACGACACAAGACCAACGCCACATGGAAACTGGAGTCTGTTGAGTAAGGCCAAAGCAAATTTGAAAATTCTAACCCACGAAGAAATTAAACCCCAAATTCTAGAAGCAGCAAGAAAAGTCGATAGAGAGATAGTCGACATACAGGAAGTCAAACCATTGCTGAGAATGAAGATCCACCAGATCTCTCTCGAAGAGCACATGGCCTTCAGAC…
336	539	107604	109004	1401	+	LINE/Tad1	GAAGAAGAACATGAATCGTGAACATCTACAATCAACACCTCAAGAAACATCAACCAAGAAGGAGACGAGGGATACTGGAGTTACAGAATTGGGACGAGATTATAGATGAAAGAACGATATTGGCTGCGATTTCAACGCCACAACCCCCAATGGGGAAGCAACAAAACCAAGGATAGAAGCCACAGTTTCGAGATGATAGAAAAATACAACCTGCAAATCTGCAATGAGTTCCAGCCAACAAGGATGGGATACGACAACCAACAACCCTTGACCATAGATCTCACCCTGACAGCCGGACCTACAATCAAGAGTTGGACAATCTTAGATGATGATGGTCATTACACCCCATCCGATCACAAAGCTATCTCATGGCAGACCCAGAAGAAGAAGGAAACACAG…
337	539	109028	109285	258	+	LINE/Tad1	GGAACCATCCTGATAGATGTCAAAGATGCATTTGACCATGTTTCAAGAACAAGACTAACAAAATGCCTGGAAGAGCTGGAAGCAGACCCTCAACTAGTCCACTGGACAGATAGCTTCATAAAAGACAGAAGAGTATCCCTGATCATCAACAGGCATGAAACAGTGATGAAAACCATGAACTCAGGAATTCCACAGTGCTCACCAGTATCACTGATCTTATTAGTGATTTACATATTGGGAGTCATGGAAGAAGTGGAA
338	541	4062	7828	3767	C	LINE/Tad1	GCCGCCCCAGCGGTTGCCAGGGAAGTATCCAACTGGGCAATTGACGAGGAGAACCCCACCGGCTCCGACCATGAAGTCGTCCTCTTCCAGATATCCTCCCTACACCCCGATGTGGAACACGACACACCAGAGCCCCACCTTAACTGGTGCAAAACAAACTGGTACACATTCACGTCCACCCTCCGCAAACTCTCCGCCAACAACCAACACCTCTAGAGCACTGCGCGCGCGAACCCCACCGAATGCCAGCTCGACGACTGGGAAGTCCTCCTCTGCAATATTATCACCACTGCCACAGCACAGTCTACTGCTGCACTCATCCTCTCCCCACGATCAAAACGATGGTGGTCCCCAGAGGTGGAACACACAAGAGCGGCCATGACCAGTGCTCGCCGCAAG…
339	541	7833	9484	1652	C	LINE/Tad1	GCCCTGACCCCTTGCACCCTGCCTGCTGCGTACCTTGGACGTTCCCTCGAGCCTGCCGTATTACCCCCGCCACCTCCGTACTCTTCCAAACCCCCCTACAAGGCACCCAAAAAATGCCTCCCCCTGAAACCAAGCCCAAAACCCAGAACCTATCACGCAAACCCCCCAAACCCCAAGACATTGTGATCCCTTGCTCGGACCCCCAGGCTCTCCCCGAAAGCGTCAAGGTAACCATTGGAATGGCGGTAAATGCCACCCTACAGGAAGCCAAGGCCCCAACAACACTCTCCATTACGACGGTCCGCAAAAACATAGCGGGAAACCTCCTGCTCACCCCCGCTACACACACCCTCACTGCCGACATCACCACCCACCTCCCCACCATCAAAGAGGCCACCA…
340	542	24	722	699	C	LINE/Tad1	CCCATATGCCTGGACTCCTAGTTACATTGACGATGTAGCGATCGTGGTCCAGGGACGCACCCAAAAAGCAAACGCCCGCGCGCTCGAGAAAATCACAAATACAGCCTTTCGGTGGGCCGACACCAATGCCATGGCCTTTGACGATGCGAAGTCAGAGCTCCTGCATTTCCACTGGGCATGCACCGATAGCATCACTGAGGAGGAAAAAGTTAAGTTACTAAATGGTACAGTTATCACACCAGGAACACAGGGAGGAGAGAAAAATGTCGTGAGGTGGATAGGCCTGTATTTAGATAGGAAGCTTAACTTTAGAAAACATGTAGTTAGATGAGCAACCGCCGCGCAAAGAACTCTGAACGCACTGTGTAGGTTGGCACTGTACGACACAGGACTGTCCCC…
341	543	38	349	312	C	LINE/Tad1	ACAGATTCGATGTCAGCCCTGAAGAGGATTTAAGAATCGACCCCAACAGCAGGCCAATGGATCACCAAGACCATCGTGGAAAGAGAGAAAGCCCTAAGCCGAATAGGATGGAACACAATCTACCACTGGGTCCCAGGACACTCAAAGATCGCAGGAAACGAAAACGCCGACCACGCAGCCAAGGAAGCCGCCAAAGGCCCCAACCAAAACGGAGTGCAACGCATGTCGAAAGCAGAAAGCTTCACATCAATAGCCACCTGAATAGAATCACCAAATAAAAGCGAACAAAAGAATCAAAGAAATGAGTCGAAA
342	543	114886	115314	429	C	LINE/Tad1	AGAAAACAGACTCGCGGACATCTGTTCGGAAGGTGCAGGGCTTGGAGGAGAGAGCTGCTGGACTTGAAGAAAAAGGTCGAACGGCTCAAGGGGAGGCGAAGGGGGAGAGGGGCAAGACTGAAGGTAGTTTCCTTATTTCAGGACGAGCGGTTGACGGATGCTGTCCTAGAATTCCTGGAACAAACAGAGATAGGCAGACGATATGAGTAGGATACCATAAAGGTACCACTCTCTTCTTTCTTTATGAGATGCTACGGCTTTCTTTCTTCTTTTCTTTCATTTTTCTCTTTCCTTTGTACGGCGGTTTTTATGGGATTAGGAGATTAGGGGGCCTCACCAGGTGGCTCGGACCACGAGGACGGGATTTGGATTTCTTTTGTCCTGCATGGGCCTTTCAGG…
343	544	54	865	812	C	LINE/Tad1	GCTGCCCCGGCGGTAGCCAAGGAAGTGTCAAACTGGGCCGTTGATGAGGAGAACCCAACCAGCTCCAACCATGAGGTAGTTACCGTCCAGATCACCTCCCTAATCCCAGATGCAGAATCCACGTACCCAGAACCCCGCCTCAACTGGCACAAAACAGACTGGGACAAGTTCGCCTCCACTCTCCAACACCTCTCTGCCAAAAAACACCCCCTGTGCAGCTCCCTCTGCTCGAACCCTTCCCCACAAAACCTTGATGAATGGGCAACCTTGCTCCACGACATCTTCCTCTTCGCGGCCACTACTTCCACCCCTCCACTCCTCCTATCTCCCAGATGCAAATGCTGGTGCACAGCTGAGATAGAGCAAACTCGTAAGGCCATGTCCCATGCTCGCCAGACA…
344	544	871	2452	1582	C	LINE/Tad1	CCGCCTCCACCCTCCTCTTCCCCAACCTCCCTCCTGCCACCCACACCCCCCCCATGAAAACCAAGGTCAAAACCCCCGCCTCGAACCGCAAACCTCCCCACCCCCAGGTCATCGTCATACCATGCTCGGACCCCTGCACTCTCCCCAACAGCACCAACGTTGCAATCAGTCTGGCAGTCAATGCTGCCCTCCAGAAGGCCAATACCCCTGCCACAGTTGCGATCACGACAGTTCGCAAGAACATGGGGGGCAACCACCTCCTCACCCTGTCTGCCCAGACCCTTGCCATCGACATCACGACCCACCTCCCAGTCATCAAGGAAGGTGCCATGGCGGTCCACCCATCCCTCTTGCCCCCACGCCTCAACGAGAAGTGGCATAAACTGGCCGTACATGGGA…
345	544	3803	5242	1440	C	LINE/Tad1	GCGGCTCCAGTGATAGCCAGGGACATGATGAACTTGGCTGTTGACGATGACATCACCACTGGCTCAGACCACGAGGTCATTGGCTTTCAATTAGACTCCCTCCACCCTGACCTCGACACCACATCCACCACCCCCCACCTGAACTGGCACAAGACAGATTGGGCAGTCTTCACTGACACCCTACAATGGCTGTCCGACACCACCTACCCCCGCTGGACCCATCTCAGAGGCAACCCCACTGCACGACACTTAGACGAATGGGCAATCCTTCTCCGGGATGCCATTCAATCTGCAGCCAAAGCTGCCACACTGGTGTCGGTCCTCACGTCCCGCTCGAAGACATGGTGGACAGCAGAACTGGACCAAACCTGCAAAGCTATGACCAGCGCCCGTAGATGC…
346	544	5248	5900	653	C	LINE/Tad1	CAACCCCACCACCTCTGAAAAGTCCCCCGCTGACACCACCATGACTGCTGATGAATAAATACACAGCTACAGTGCCGACCCTCTGAATTGTGTCCCATAACACAAACCGCAGCCCCACCGCCCTCACCACCCTGCTGAGCACCACAGGGAACTCCGCCGACATCATACTCATACAGGCAGTCAACATCCAAGACCCCAGGTATGCAGTAACCCACCCCGACTTCCTTTTCCTCCTACCCCTTTGCGGAAACTGCACAGTCAACCGCATGGCTGCATATGTTTCTCGCATCAACCCTCACATCCATGTCACTTCCATACCAGACATCAGCGAAGACACCAACCTCCAAGTACTGGAGGTCAGCACCAACCTTATACCCGCCGTTCTGCTATTAAATATAT…
347	548	91480	91733	254	+	LINE/Tad1	TACGATGTAGGCTTCGGCCCGATTACCGGGGGTGTTTCCTTTGTTTGTTATTTCTACCTTTTATTAGGCGGTCACGGGGGTCGGCGGGGGTGCCACAGTTGACGCCTTATTGTATTAGTATGATATAGGCGGTGGACAGGATCTATGGGGAGGCGCATGGAAGGCCCCTAACGGGGCGGGCCCCCAAGCGGTGCCATATTCTAGATAGAATACATGCACCGCTATAGCAAATATATTGATTCAAAACAAACAAA
348	548	103818	104359	542	C	LINE/Tad1	TGCCGTAATCGCACCGTACCTGAAGGAGAAGCTAAAAAAGAGGGACTCCGATGCATGTTGGTGGTGTGAGTCAGGAAAGAGGCAGTACCGAGAGCATCTCTTTAAGGAGTGCTCCCGTTGGACCTCCAGAATTCGGGACCTCTGGAAACGAGTAAGCAGAGACGTGGGGTGGAGGAGGGCGCGGTGGAAGCCCATATCACGGCTGTTTAGAGAGGAGAGAGCTGAGGAGGCGGTTTTAGAGTTCCTCAGGAGAGCGGAGGTGGGGAAGATGAATGGCACTGGTGGGCCGAGGGAAGAAGTGTCTGGAAAGCCGAGTGATGAGGAGTGGGAGGGTCAGACCGAATAGGCTACCTTGGAGATACTATCGTGCCTATTTGTTTCTTGTTTTCTGTAAAAATC…
349	549	24	430	407	+	LINE/Tad1	CCCCCGGTTAACACTCATAATATCCAGATGGTAGCAATCCAGTCTACCCTTTTCTATGGTGCAAAGCTCTGGTGTGATTGCAACCCTAAATTGACATGGCAATTCCAGTTAGGAATTAACAGGCTGCAAGAGGCATATTAGAATGCTTCCATTCAAATCCTCTATGCACCCTTCTCCCGGAAGCCAACATGACACTACCGATCCATCTCCCGCACTATTGCCGAATCCAATATGCCCAACGCCTACTCCGCATGGATTCAGGCCCAAGGCAGGTTCTATCCATCAGCTCCGATTTCGTTAACCATCTAAATGATGCTGTGCTCCTCCCCCATGAGCTAGATCTGATCGAGCCAGTTCATCTACCATCCGGCATGAAGTTCCCGGGGTTGCTGCCACCGG…
350	550	172865	173189	325	+	LINE/Tad1	CAGCAATGGCGGTGCTAAAATGAATTGTGATGAGGTATTGCCAACTCAAGACGCATCACGCGACTCACGCCGTCATTGGTACTCACCGAAAAAGAATTAACACTTTGGATGACCATTGACCACCGTTGTTGGTGGTGCAGCAATGGAGAACGTCAAACGGTACATTGCCTGATGAAGGATTGCCGCCAATGGAGGAAAGAAAGATCTCAGCTGCGTAAATCCAGCGGCGCGGGAACACCGAGGAGTGCAACATCTCTTCTCCGAGAGATTCAAGACGAAGCACATCATGAATTTCCTTGATACGGAGGTGGCCGTGGGTAACAGA
351	550	212989	213672	684	C	LINE/Tad1	AGCTACGTACAGGCCACGGACACTTCGGATCTTACCTACATACGATGAAATTCAGAACACACGACAGCTGCACATGCCGGAATAATCCAAGGGAGACCGCCAACCACCACTTATTCCACTGCCCCCGCTACTTGAAGGATAGGCTGGCAGTAGCTAAATCTAGCCGTATCCCCCTCCACACCAAAGCTTTCCTCTACAGCGGTATCGCCCACAAAGCCCTCGCGGAACTAATCCGTAACACCCAGATTGGCACCAGATTCGAGGGATTAGAGAAAGAGAAGGAAAGTGCGATGGCAGCAGATGAAGGAGATAGGGATGGCGTGATTGGCGGGGAGAATTGGGATGACGACGAGGTGGAGGAGGATTTCGAAGAATTGGCGGCGGAGTTGACTGAGGCGG…
352	551	19	846	828	C	LINE/Tad1	GCCGAAGCAAAGTACTGGCGACAGCGAGCTGAGACTGCAGAGAACGAGCTCATCAAGCTCGGCCACACACTGGCCCCCACTGCCCCCCCTCAACCTCCCAACCGACCATGGCAAGGCCCCCCCGCCTCCTCCATCCTCTTCCAAACCCCCCCACAAGGCCCCCAAAAAACGCCTACACCCAAAACCAAGCCCAAAACCCAGAACCTATCCCACAAACCCCCCAAACCCCAAGACATTGTGATCCCTTGCTCAGACCCCCAAGCTCTCCCCGACAGCATCAAGGTAACCATTGGCATGGTGGTAAACACCACCCTACGGGAAGCCAAGGCCCCAGCAACACTCTCCATTACGACGGTCCGCAAAAACATAGCAGGAAACCTCCTGCTCACCCCCGCTACA…
353	555	17646	18215	570	C	LINE/Tad1	GGAAAGAAGACAAGAGAAGGAGAGGAGGAACAGAGTGGTCAGGATGGATGTAGGCGGAGAGGGGCGATGGGCTGGAGGTGGGGAGATGAAGGGGCAGGCTTCATGACAGGGGGTACCAGGGGGAGCAAGGCAGTGCAAGGTGTGCGAGTGAGAGAACATGATGGAGGACAGAGTGCTGGGTGGAAAAAGAAGGCGGATGGATGGATTGCAGGGAAAGGGGAGAATGGAAAGCGAGGAGGGAAGTTGAAGTGGGGAGAGATCAAGATGACAGAAGGGAGGAGCAGGAGGCAGAGGCAGCCAGGCAGAGTTTTACTTCTTTCTTTTGTTTGTTTTTGCTTTGTAGAGGAAATAAAGGCAGGAAAATGGTTAAATATGGGAGGGGAAGGGTGGGGGAAATGG…
354	555	18243	21629	3387	C	LINE/Tad1	CTTGGTCACCCCGTTGATGGCAAGGGAAGTATCAAACTGGGCAATTGATGACAGAATTGCCATGGGATCGGACCATGTAGTCCACTTCCAACTGGACTCCCTCCACCCAGATCATCCCGCCTCGCCTACCACCACATGCCTGGATTGGCACAAAACAAATTGGGAATCCTTCGTGACAGAGCTACAACACCTCTCTGAGACAGCCTATCCCGGCTGGACCAACTTCCACGCAAACCTGTCTGCCTGCAACCTTGATGAATGGGCAATGATCCTCCGTGACTGCACACAGAAGGCACCCACCACCAGAACACCCACCTTAACCCCCATGCCATGATCGAAGAGATTGTGGACAGAGGAAGTAAGCAGGATGCAGAAGGTGATGACAGGCACCAGAAAATG…
355	558	47477	48193	717	+	LINE/Tad1	GGACGAGCACATACCCAGATAACAGAAACTATGATACACCGCGCAGTACATCAACAATCACAGAAAAGAAAACCCCAGGTCTTGACCTCCTCAACTTCCGAATCATCAGTTTTTTATGGGCATGGGACAAGCAACGCATTATCGATATCACGACACAATACATCCGCACAGGGACCCACCCAAAAGCGTGGAAAATCGTAAAAGGCATCGTCCTCCACAAGGCCAACAAACCGGATTACTCCAAACCAAAAGCGTACAGAGTCATCTCGCTATTAGACTGTGTTTGTAAGGTAGTCGAGAAAGTTGTAACCGAACTCCTATCAACGACGGTTGAACCAAAATTACACACGGGCCAATTCGGCTGCAGGAAACGACACTCGGTAGTGGACGCTGCATCTT…
356	558	135995	136474	480	C	LINE/Tad1	ACACATGAGTTTCTCTACAGAGACATAGCATACGAAGCACTTGCAGAGCTTATCCGCGATACCAGACTAGGCACTCGTATGGAGAGGGCCACCAAAGAGGAAGAAAGAGAAAGAAACTGGGAAGAAGAAGGGGGCGGCGAACTTGGAGCGGACGGGGATGACTTGGAGGAGGATGAGGACGAAGAGGAATGGGAAGAGGATGAGGAGCTAGTCGGTGCGGTGGCAGAACCGGTGTTACTGGAAGAAGCGCTAGGAGCGGCGGGACGTTGGTTGTTTGATGAGTTTGGAGGCGCGCACGGGGACGTATAGAATGGCGTTGTTTGTTTTCCAGAGGGGTTAGAAGGTTATTAGAAGGGCACGAGGGAAGATGATTACTGTAGCAACATTTTACTGGATTCA…
357	558	203467	207407	3941	+	LINE/Tad1	CCTTACTGACTTCGAAGACGAGGAAGAAGACGAAGAAGACGCAATGGAGATCGAAACAAACAAAGAAACCAACCAATCCAGCCCTAAAATCGAAAAGCCAAACCCTGAGATAATCGAAGCGAACCCCCCGGCCAACCGACCAAACCCGAGGCCCCTGAGAACCCCCCGCAGACCTTGCACACTGACGTTGACAGCCCTGCTAATCTGACAAGCCAAAAGAAACTGAAGAAACCAGCTGCAAAGGAGAAACCGAAAAGAACGGAGCAGAGAGACAGCAACCGTGCTAAGAAAGCAACGGCACTGGCAACAGCAGCAGAGAGAACCCTAAAGGCTAGAAGATCAGAAAGAATCATCGAAAAGCTTACCGAAAGAAGCACAAGAAACCAGAAAAGACCCCCA…
358	558	207413	209322	1910	+	LINE/Tad1	TCGCCGGAGCTCTACTAATGGACGTCAAAGGAGCGTTTGATCACGTATCCAAGACGCAGTTAACCAAGAGAATGGAAGAATTGGAAGCAGACCCGCAAATAATCCAATGGACTCATAGCTTCATGACGGACCGAAAAGCGTCACTGGTGATAAGTGGACACGAAAGCGCCATGAAAAAGACAACAACCGGAATACCTCAAGGATCGCCAGTATCACCCATTCTCTTCGCAATCTACATATCAGGAATCTTCGAAGAAGTAGAAGAAGAAGTCCTGGGATCCACAGGATTGTCATTCGTGGATGATATATCATGGCTGGCTGTAGGCAAAGACGTAACGGAGATAACCAACATACTGATGGCATGAGGAAAAGCAGCAAAAGTCTGGGCAAGCAGAAATG…
359	565	3	290	288	+	LINE/Tad1	CCTAATTCCCCCTTTCTACCTAATCAATATTTACAATGAATGGGACCCCCGCACCAAACTATACACTATCCCGCGCTCTCTTACCCCCCTTCCCCTGCCCAACCACTGTATCATTACTGGCGACATGAATGCTCACCACCCCCTGTGGAACAGTCACTACAAACAAGTGACCCGAGCAGACGAACTCGTGAAAATGATAGAGCATGAAGGTTGGCAACTTGCAAACACTCCAGACACACCAACATACCATTACAAGACCGGACTTGGCTCCTCCATCCTGGATCTCAC
360	565	299	2460	2162	+	LINE/Tad1	CCCCTGCCATGACAAATGAAGTTCAAAACTGGTGTGTTGACGAAGAGGCAGCAACAGGCTCTGACCATGAGGTGATCCGCTTCCAGGTATGCTTGCAACACCCAGATGTTGAATATGTAAATCTACAACCACGATTGAACTGGAAGCGCACCAATTGGGACGAGTTCGCTAGCACCCTCCTCTGCCTCATGAACCGACTATCCCCCAGATGGCAGACACTCCAAGTGAACCTGACCCCACCTAACCTCGACGAATGGGCAGCATCTCTCCAATCTGCCATTAAACAGGCAGCTCATAACTCAACCCCACTGGTCAAACACTCCCCCCGCTCGAAGAGATGGTGGACCCAGGAGCTTCGTGATACGAAGAGAGCAATGACACAAGCTCGGATGAGATGGA…
361	566	35994	36390	397	C	LINE/Tad1	ACGAGATACTGGGGTGGAATGAAATGACAAGGACATCGGAAGAAAGAGAGGAAGAGGAAAGACTGGAGAATGTAGAAGAAAGGAGAAGAGAAGCTGAAGAATTTATCGCGGAAGTGCTAAGAGCAGCGGAGGTTGGCGGCTAGCTCGATGAAAATGGGTAGAAAGAATGAAGAATAAAGGAAAAAGAAGAAGTGGGACAGTGTACGGCGAGGTGAAGCTAAAAACCTGTAAAATCCGGAGGATAACTGAGTTAATCTGAAAGAGGCACGAAGAGATAGAAAGGCGAATGTAAAAGAGGATGGAGAAGAAAAGAGGAAGAATGAAGATGGAAAGCGACAAGAGAAAATTTAGATTAGAATACCCCGTGCCGGAGTCAAATAAAATGACAAAATCAAAA
362	566	119172	119386	215	C	LINE/Tad1	ACGCCAAACGGTGAAACACCGCAGAAAATGGCGAAACGAAAGAGAATCCCTACGGAAGAAAATCCCGCGTGGGCTGTGGGAACACGGAGATATCAACCATCTGTTTGCATCAAGAGATTGCACAGCTGTCCAGTTGAAATTCCTCGAAGACAGAGAGTTTGGAAACAGAACCGCGGAAAAAGGCAGCGAAAGAGAAAAGGAAGAAAGGGATGAAA
363	568	67000	67297	298	+	LINE/Tad1	GCGGGAGGGCTAGGAACGCTGATGATTGGTTGCATGGGGAATTTTGGGAGCGAGTAGAGGCGGCATTAGAGGACGCGTTGTATGGGGGCGTATAGAGTTAGATAGGTTTTCTTTTGGGGACGTTAGAAAAGGGCGTTTGTTTAGGGACGTATAGCGAGGCGTTATGTGGGGAATGTTGGAAATTAGGCAGCTAAGACGGAGCACGATATCATGATTGTACAAAAACGCTGGAAAGAGGTATATTTAGACTGTATTTAGGCGAAAATCCATCGGATAGCCGTAATAAATTTATTAAAAA
364	573	27041	28205	1165	C	LINE/Tad1	GAATGGAATGACCGGGAGGACACTGCGTGGAAGGACGGCTCCCGCCTGGAGGATGGGAGGGTAGGATGCAGTGTAGTATGGCAAGAAAACAATGGGGAATGGACAGGCCAAAAAACCCACCTGGGAATGAAGAAAGAGGTGTATGATGCAGAGTTGTGTGCTATAGAGCAAGCAATACGCCGGTTCACACAAAGAGAGCAGGAGAACCATGACTACGCCATCTTCAGTGACTCTCAAGCAGCAATCGAGAGGTGCAGAAATGACGAGCCGGGACCGGGACAGGCCACCGCGAAATTGGTCTTGGACGGAAGTTTAAGACTGGCCATCAACCACTGCAAAGTGTCATAGAGATGGGTGCTAGCACACAAGGGGGTAAGTGGCAACGAAATGGCGGATTGG…
365	581	6835	7652	818	C	LINE/Tad1	CAAGTTTGGGGTACCCCCAGCGAGCGCCCGGAATATCCAAATAGCGATCATCCAGTCAACCTTGCTGTATGAGTCGGAATTGAGCTGGACAGGAGCAGCCCCGGAGACCAAAGACTACCAGCTGGCGATTACTAGAATGCCCCGTGGAACCACTGGAGCGTTCAAATCAACCCCTCTCGGAGCACTCCTGGCAGAAAGTGGATTAACCCCGGCAGTCCCGCTACTGGATCACAGACAATCACGCTATACCCAGAGGATCCTTCGACAACCGGAAGAAACCAGAGGGGCGAAGGAAGTGCTACTGGCGACGCAGAACTCGGCGCTATCCCAACAGATTAAAAAGATGAGTCACCTGAATGGAGACCGGATGGAGAAGACCTATCTGGAAACGGGAAAGGC…
366	583	64684	65140	457	+	LINE/Tad1	AAACCCGGAACCACCTGTTCAAAGAGTGTGCAAAGTGGAGCGCAGAGATAAAGTACCTATGGAGGAGGGCCGGGAAAGACGTCGGTTGGAGACGGGCAAAAGTTGAAGCCAGTGTCGAAGCTGTTCAGAGAGGAGAGAGCACAAGGTGCGATATTAGAGTTCATCAGGAGGACAGGAGTGGGCAAAAAGAATGGCGTGAGAGAGCCGAGACCAGACGATGAAATAAGTGAAGAGGAGAGTGAGGGCTGACCACCCGGGAACAGTAAATCAGTATGTGCTTTTGTTTGCTTTCACTTTGTTTTGTAATTCTTATAAATATGGCGGAAGTGGGGTAAGAGGGGAGCCACATATGATGCCCTAAGGGGCAGTGGACAGGATACAGGTTGGCAGAGGAAGGCG…
367	585	131	2783	2653	C	LINE/Tad1	CCTGACCCTATCACCCACCCCGCACTCGAAACGGTGGTGGAATAAGGAAATCCGCCACACCCATCGTGAAATGACCACCGCCAGGCGCTGATGGAAGCTCTCCTGACTCCACACCCACCACCACGAATACAAGCGCCTCCACAACAAACACTACCGGACAGTGCGCTATGCCAAAGACTCGCTATGGAAGGAGTACCTTGCGGCAGTGGAAGGCCCGGATGTCTGGGCAGTGTTTCATTACATGAACTGACGTCGCACCCAACTGACCCCGCTGGTGAAAGCCCTGGTAGGAGGCACAGAGAAACTGTGCATTGACTTCGAGAGTAAGGTTGAGGCCTTTCAAGCGCTCTTCCCGCCCCCCCAACTACCCCTCAGACCCATAATCCTGGCTCTTCCCCT…
368	586	10	992	983	C	LINE/Tad1	TATCACTCGACTACCCCCCCCCCTGCGTTCTCAACAACCACACTGCAATCGCCAGATTTTCGAGCGGATTATTGTTCAGCGCCCCCAATTTACCTATCCGCAACATTTTCAGCCCAGGCCCTCTCTTTTTCATCGCGTTACACGGTGAAAAAGGGATCTCCAGGCCCCGGAAGAAGTCCAGCAGACAGGTCATCAACACCCCACCCCACAAACAACAAAAATCATCGATATTCTGGCGGAATCTTTGTCACGTCTACAAACACTACTTATTTCGAAGTTCCGATGCCTCCCCACTCCTCCATTGTGGAGAAACAACCTCTCCCTCCTGACAAACCTCCCTCACGCGTGCTCGCGAACAAAAAATGCGCTAGCGCAGAGCCGCACACTATGCAAGAATGC…
369	586	1011	2185	1175	C	LINE/Tad1	CATCGCTATTATGACGGTCAGGAAGAACATATCTGGAAATCTCCTATTGACCCCCTCCCCCCACACCTCAACTGCCGACCTTACACCCCACCTTCCCCTCATTCACACTGCAGCCCGCTCAGTCCACCCCTCTCCGCTGACACCCAGGCTCAACAAGAAATGGTATAAGCTGGCCATGCAAGGCATACCCACCGACTACTTCCCTGACACTCCCAACGGTATGGATCTCCTACAAAAAGAAATAGAACATAATCACTGCATCCACCTCACTCAACCTCCTCAATACATCTCCCACCCTGACAAATGAGTCAGTAAGTCAGGTTCTAGCGTCATGATCACCCTGCAGTCGAGTGAGGACTACAACACCCTCAAACGTCTGAAGGTAGTAGTACTTTTCAA…
370	587	31637	32286	650	C	LINE/Tad1	TCCCGGCTCACCCAGGAGTGGATACAGAAGCACCTTGCCGACAGTCGGTCGTATAAACCAAAAACGAAATGGGGGATCCGCAAAGCCCTCAAAAAAATCCCGAAACGCCGAGCTGCGGTTTTCCTCCAACTGGCCTCTGGTCACGCTCTGATCGGGACCCACCTCACCCGGATCAAAAAGAAGGAGGCGGACACTTGCTGGTGGTGCCACTCGGATAGAAAACAGACTCGTGGCCACCTTTTTGGGGGGTGCAAAGCTTGGAAACGCGAGCTGTTGGCACTACGGAAGAAGATTGAGAAGCTCACGGGAAAGAGGAGGGGCAGGGGCAGACGACTGAAAGTAGTCTCCTTATTTCAGGATGAACGGTTTACAGAGGCCATTCTGGACTTTTTGGACGAG…
371	589	87	3454	3368	+	LINE/Tad1	TAGCGGCGCCGGCAGTGGTGAGGGAAGTGATGGGCTGGGCCATTGACGATGGGCAAGCGACGGGCTCTGACCATGAAGTCCTGCCCTTCCAAGTTGTCTCCCTACACCCCAACCTGGAGAGAACACCGGACACGCCCTGCCTGAACTGGCGCAAAACGAACTGGGAGACATTCACCTCCACCTTACAAGACCTCACCAACATGACACACCCCAAATGGACTCACCTCAGCTCCCACCCCTCCGCCCACAAACTCGATGCATGGGCAGCCCTGCTTCGCGACCACATCCAACAAGCTGCCCGCGACGCCACCCCCGCGACACCACCCTCCCACAGGTCAAAACGCTGGTGGACAAAAGAGCTGGGAGAGTCAAGAACGGAGATGGCAAAGGCCAGGAAGA…
372	589	3794	4053	260	+	LINE/Tad1	CTTTTTCTTTTGTTATGTTATTGCGTTTGGGGGAAATATAGGCGGAAAAATGGCATAAAAAATCTGTGGGGAAGGGTGGAGGAAAGAGGGGAATGACCGGGCGAGGTGGCCCCCGAGCAAACAGGGCTCATTGGACTTGAAGACGCTTATGTACCAAAAACCGACAAGAGTTGGGGGACTACAACCCCACAAACCAAGACTGGCTCTGGGGGCCTATCCCAGGGGGAGTCTGAGGTAACAGACAGACTCTCATACTTTGT
373	589	7017	7247	231	C	LINE/Tad1	GGAGGAAATAAAGGTGGAAAAATGGTTCAAATTTGAAGGGGAAGGGAGGAGGAAGGAGGGGAACAACCCGGCAAGGTGGCCCCTGAGCAAGCAGGGCTCTTAACTGAATTGGCACAATGGAAACCAGGCTGGAGAGATTTGGGCAGCTGCAGCTCCAACACTGAAGCATGCTCTGGGGCTCATCCCAGTGGGATCCTGGGGTTACAGCCAGGGCCTCAAATGATGTACATA
374	590	99	344	246	+	LINE/Tad1	TTATGTCTTGGTTTGTGGTGGAAATAAAGGCGGGAAAATGGCTAAAACTGGGCGGGGAAGGGTGGAGGATAGGGGGGAACAACCCGGCGTGGTGGCCCCTGAGCGCACAGGGCTCCTGGAACTGACGACGCGAGATGGATTAAGACCCAACAAGAGGGGAGACTACACTCCCAAACCCTCATAACAGCTCTGGGGCTTACCCAGTGGGGACCTGGCATCATGCCCAGGTCCTTAACATTGTATTTA
375	590	411	1841	1431	C	LINE/Tad1	CCGAAATCCCCCCCTCCCCGAATTCCCCTATTGCCAGCAGCACTGGTTGTGGTGAACCCCAAAATTTCCCTCCTTTCGGACCCTCCTTTCTTTGCGAAAATTTTCTTTTCTCGCTTAACAAGAGCCGCATCACGTGATCCTTGGCCATCGCTTATGGAGTTCCCGATTTAGCGATGGACGCTGATCCGCCCATCCCGCCAACCCCCTCGCTTATGCAAGTACAAGGTGACACCTGCAGCCCTACTACTCAAGTTCCGGCAACCCCAACCCACTGAATCATAACTATTGATCCCAACACCGCCATGTCCACTGACCCCCTCGCCCGCGCAGATGCCCCTCACGCTGGCACATCCTCCACCATTGCCCCCTCCCACAGAAAGCCTACGTCCTCTACCTCCC…
376	590	1913	2149	237	C	LINE/Tad1	TTTGGGAGGAAATAAAGGCGGAAAAATGGTTAAAAATGGAAGGGAAAGGGTGGAGGAAATGGGGGAACGACCCGGCGAGGTGGCCTCCGAGCGCACGGGGCTCCTGGAACAGACGACGCGAGATGGAATGTGAACCAAATGAGACTTGGGGGACTACAACCCCACACATGAAGACTGCTCTGGGGCATATCCCAGTGGGGACCTGGGGTAACAGCCAGGCCCTAAAGTATGTATTTA
377	592	5858	6281	424	C	LINE/Tad1	AAAATAGAAAGGATAAGGGACCTCTGGAAGAGAGTGAGCAAGGACGTTGGGTGGAGACGGGCGAGGTGGAAGCCTATTGCGCGTTTGTTTAGAGAAGAGAGAGCGGAAGAGGCTGTTGTGGAGTTCCTCAGAGGAACGGGTGTGGGTAAAATGCATGGCACCGGAGCACCAAGGGAAGGTGGTTTAGAGGAGCAGAGTGATGAGGAATTGGGGGGGGGAGGGGGGGGGGTTAGACCCCAGAGGCTACCCCGGAGTTTTTATTTTGTTTGCTTTTGTTTTTTTGTGTATAAATTTATGGCGGAGCGTGGAAGCGGGGAGCCACACTTGATGCCCTCACGGCAGTGGACGGGAAAAAAACGGATAGGCGGGGAGGCGGTTTCATACTCTTTCAGAGTGCAT…
378	592	6288	6696	409	C	LINE/Tad1	ATGACGGCACCAAAAGGGATTACGATGAGATACTATGAATTGAAAACGGGTCACACCGTAGAGGATTAACTCTTTGGACGACGACCGTTGTTGGTGGTGCAATAATGGGGAACGCCAAACAGTGCGGCACTTGATGAAATAATTTCATCGATAGAGGAAAGAAAGATCCCAGCTGCGAAGGAAGTTAAATCTAGTGGTGTGGGAACACTAAGGAGTTGAACACTTATTCGCTGAAAGATTTAAGACGAGACACATCTTAAAGTTCCTTGAGGATACGGAGGTGGGCAACAGAATGTCGGAAAAGGAAACGGTAGAATGGGAAGAAGAGAGAGATGGGTTATGGGGATGGAATGTGGAAACGGAATTAGAGTCAGATCATGAGGAAGGAGTAAGAAAAGG…
379	593	825	3122	2298	C	LINE/Tad1	CTGGTTAACAGGTAAAGTGCTGGAAAAACTCATGGCTATGAGACTAGGCCAATTAGCTGAAACACATGACATACTCCATGATGACCAGATGGGTGGATGCACCAAGCATTCGGCAATCGATGCGGCAATGGCACTAATGCACAATATTGAGACCAATGCAAAAAATGAACTGGTGACATCAGCTCTGTTCCTGGACATCAGAGGTGCATTTGACTATGTGTCCACTGCATGCCTCTTCCAGAACATGCAGCACCTCGGTTGCCCCACACCCGTGATATCCTGGTGTACCTCATTTCTAACCGAATGCACAATGGCCCTCTGCTTTGATGGACATACTGACTCTCAACACCCCATCACAATGGGTATCCCCCAAGGTTCCCCTGCAGCACCAATCCTGAT…
380	597	1490	1801	312	C	LINE/Tad1	AGAGGAAGCATGGAGAGGGGGTGGGGCAGCAGAAGCCCAGAGGCATTTACCTTTTCTTTTGTTCTTGTTTCTGTTTTTGCAATGGGAGGAAATAAAGGCACAATACTGGATTAAATATGACAGGGGAAGGGTGGAGGAAATGGGGGAATAACACAGTGAGGTGGCCTCTGAGCACACAGGGCTCCTGGATCAGAAGATGCTAGATGGACGAAAGCATTATCAGTGTTGGGGGACTACAACCCCACACCAAACGAAAGCTCTGGGGCTTATCCCAGTGGGGACTCGGGGTAACAGCCAGTCCATACCCTTGTA
381	597	2021	5500	3480	C	LINE/Tad1	GCAACCCTGGAAATGGCTAGGGAAGTATCGAACTGGGCCATAGACGATTGTATCACCACAGGATCAGACCATGAAGTAGTCCACTTCGAAGTGAACTCCCTCCACCCAGACTCCACCATCTCAACCACCACTACCTGCCTGAACTGGCGCAAGACCAACTGGGATACCTTTGTCACTGCCCTGCAAAACCTCTCTGCATCATCCTACCCCTGATGGTCCCACCTCTGAGCAAACCCATCTGGCCACCATCTCGATGAATGGGCGGCCCTTCTACACAACACAATATGAATGGCAGCCACAGCTGCGACAGCTACCCTGACCCCCTCACCACGATCAAAGAGATGGTGGATGGAGGAAGGAAGTAGAACGTGGACAGCCATGACAGGCACTTGTCATAAG…
382	597	5505	5872	368	C	LINE/Tad1	CTCAACCCCCATATCCATGTCATTCCCAGGCCGGACATAAGCGGCGACCCCAACCTCCAAGTGCTCAAGGTCAGCACCACCCTTATACCCTCCTTCTACCTCATAAATATCTATAATGAATATGACCCCGCCACACAACTATACACCATCCCCTGCTCATTAACCCCGCTTGCCCTCCCCCAGAGATGCGTAATCACTGGAGACCTCAATGCCCACCACCCCCTGTGGAACTCCCAGATGAGGCAAACAGCATGGGCAGAGGAGCTCATGGAACTAATCCAAGAACACCAATGGCAATTAATCAATGTCCAGGACATTCCAACCTACCGCTACAGGAATGGCTATGGCTCCTCAGTCCTTGACCTCAC
383	600	1291	5191	3901	C	LINE/Tad1	TAGCAGCCCCGGCAATGGCAAGGGAAATTTCTTCTTGGGCCATTGACGATGGCATTGCCACGGGATTGGACCACGAGGTGATCCGCGTCCAAATCAACTCCTTACACCCCAACCACCACAACACAGCCGGCAACACTACACGACTAAACTGGTGCAAGACAGACTGGAAAACCTTCACCGAAGAACTGCAATGCCTCACCGAAGCTTCCTACCCCTGGTGGTCCTGCCTCCAAGCCAACCCCTCCGCCGAGAACCTCGACGAATGGGCTGCCCTCCTCCGCGACTCTATCCACACCGCCGCCATGATATCAACACCTACCCTCACCCCAACCCCGCAGTCGAAGAGGTGGTGGACGGAGGAGGTATGCTCGACATGCAAAGACATGACCTGGGCCAGGA…
384	600	5194	5438	245	C	LINE/Tad1	GACCCCCAAACAAAACTATATACCGTTCCCCGCTCCCTCACCCCCCTCCCTCTCCCCCGCCGCTGCGTGATGACAGGGGACCTCAATGCCCATCACCCCCTGTGGAACTCCCACGCACGAAGACCAGCGAGAGCAGACAAGCTGGTGGAACTGATGGAAGACCATCACTGGCAACTGGTAAACGTCCCGGACGTTCCTACTTACCACTATAGAGACGGATCGGGCTCCTCGGTCCTCGACCTGAC
385	602	6027	6730	704	C	LINE/Tad1	AGCTCCATACGAGGCATGGCCACTTGCTTCTTACCTGCACAAAATGGGGTTCCGAGATAATGACCGCTGCGCCTGCCCTTCTGGCCCTCAGGAGACGCCCAGTCACCTTCTTTTTCACTGCCCTAGGTACTCGAAAGACCGCCTAGCTGCAGCAAAGTTGAGCCGAACCCCCCTGCATACGAAGGCCTTCCTATACCGAGACATCGCGCATCGTGCGTTAGTGAGTCTTATTAGAGACACCAGATTGGGTACCAGACTTGATAGGGAACTAAAGGAGAATGAGAGAACGGGAGAAAGGCCGGCGCGCCGAATGGAATTGGTGGTCGCAAATCCGTTGGGTGTGTTGGGAGATGAAGACGACGAGAACTGGGAAGAAGAGGATGACTGGGATGACGAACC…
386	603	257	2033	1777	C	LINE/Tad1	ATGCTCAACACAATAAAACGATGGGTTCTACCAGATGACGCGATCGAGGACACGGCACACCCCAATGCTGCCCCATGGCTACCGGCCCACATCAAGACAGACATTCCCTCGATTCCCAAGTCCCAAGCAGCCATTGCTCATACCACGCTCATCCAAGACCTCCACAGACAGACCAACACCATCATCGCTTACACGGACGGCTCCCAACTCACCTGCAAGACAGGCATGGGATACTGCATTACAGATGGCATGCCACCACAAACCCGCAAAGCCATCCTCATGGGCGACACAACTGAAGTTTTCGACGCTGAACTCCACGCCATCAACGAATGCCTCCTTACCTGCCTGAAGGGCATTACCCACAACCGCCTATGCAAATGCCGAATTCACATCTTTACT…
387	603	2070	2904	835	+	LINE/Tad1	CCCCCCTGCATTTTCAACAACCACGCTGAAATCGGAAGATTTTATTGCGGATTACTGTTCGGCAGCCCCGAATTACCTATTCGCAGCATTTCCAGACAAGGCTTACTCTTTTTCATTGAGTTTTCATCGAAAAATGAGTTTTCGGGCCCCTGAGAAAAGCCCTGCGAACACAGTTCCATCAACACTGCACCCCACACACATCAAAAATCATCATTTTAATCGCAGATTCCTTGTCGCTACCGCAAAAATACCTTATCCCACAACTCCGATGCCTCCCCGATCCTCCGCTGTTGAGAAACAGCCCTCCCCCCCGACAAAGCACCCCCTCGGGCGCTCGTGACGAAGAAACGTGATAACTTGGAGCCCCAAGCGCCTGACGAGTCCAATGCGGAAATGCAC…
388	604	110227	110628	402	C	LINE/Tad1	TCGTTGTCTCGGTGATTCGGATTCTGTGGGATTGGGACCCCGCCCGAATTACAGCATTGGTCCGAGCTTAATCCGGCTTGGAGCACACCCGAAATCCTGGAAAGTTGCTAACGGAGTCACCATCCCAAATCCCGGTAAGGATGATTATACCAAAGTCAAGAGTTACCGTGTGATCTCTGTCCTCAACTGTCTGGGGAAGGTTGTTGAGAGGGTCGTGGCCACAATATTGTCAGACCATTGTGAGTGGCACGGGACTTTTCATCCAGGCCAGTATGGATCTCGCAGGCAGCGTTCAGCAATTGACGCAGTGGGGGTGTTGATGACCAAAGCCCAAGAAGCCTGGAGCTGGAAGAAAGTGGTAGGAGCTCTTTGCATGGACGTTGACGCAGCCTTCCTGAG…
389	604	152316	153301	986	C	LINE/Tad1	CCATCATCGTCGACTCCCAATCGGCTATTTTACGTTGTGCAAACACCGCTCCGGGCCCCGGTCAGGCGCTCGCGATCATGATTAATCAGTGCACTCGGACGCTGGTTGATGATAACACTGTCACCATTCGGTGGGTGCCGGGCCACAAGGGGGGTTCCCGGTAACGAACGGGCCGATATTTTGGCTAAGCGTGGGGAGCGTCTGATCGGGCCGCGTTTACCGAGTCTCTTACATGAGACGGCAGGCTTCGGAGGCTAAGACCCGAGGCACCAAGGAATGGCTTGCGCCGATGTTGGAGAAGGCCAAGGCCTACCGCCCCCCGAAAGAAGACTGGCTTCCGACCTGAATTACGGCACGTACCGAAGGCTCTCGCTTCCCGGTACTATCAATTAATGTCGG…
390	604	202004	202352	349	C	LINE/Tad1	CGGAAGAGAGAGAAGAAGATGAAAGGAGAGAGAGAGACGATGAATGAAGAAGAGAAGCAGAAGCATTTATAGCAGAAGTGTTGAGAGAAGCAGAGGCAGGTGGATACCTCGAAAACGGTTAAAGAAAGAAGCGAGCAAAGAACAAAAGAAGAAGTGTAACAGGCGGATGGTGAAACCCCCTGTAAATGCCGAAAGATATGAGAAAGATATACAGAAGGCGTCACGAAGAGACAGAGAAGAATGCAAGAACGGAAGAAGAAAATGTAAAGTCAGACAGACGATGATAGAGGAAAAGAGGTTGATTTAGCATACCCCGAGCAGGGGTCAAATAATATGACAAAATCGAAAA
391	608	11535	12459	925	C	LINE/Tad1	CATCAATAGCCCATCTGAACTGAATCACCAAAGAAAAGCGAACAAAAGAGTCAAGAGAATGGGTTAAAAACCTGGTCGAGGGAAGAACAGGATACCAAGCGCCAGAACACCAAAAAACGGACTCCGTAGCCATGGCAACAACAAAACGCATCGCAACCCGATATTTCCAACTCAAAACAGCCCACGCCGTAACAGGAGCACATCTAAAGAGAATCAAAACTATAGACGACGACCGATGCTGGTGGTGCAACAGCGAAGAAAGGCAAACATTACAACACCTCTTCAAATACTGCAAAAGATGGAGGCAAGCAAGACGAAAACTGAAGAAAGCCGTGAAACCTGCAGTATGGAGCCACATAAACATCGCGCATCTATTCGCCAACCGAAAAAAACAACACA…
392	609	536	1977	1442	+	LINE/Tad1	CAGATAGCTCCAAGATCGCCATTGGATTAGGTGTCAACAAAGCCCTACATGAGGCTAAGGTGGAAGGAAACATCATGACGGTTAAGAAAAACATCGCCGGGAATGTCATGCTTACCCCCTCACTGAACACATCCATCACCGACCTCACTCCCCACCTCTCTGTTATCCATGCCGCTGCCTGCAAAGTCCACCAGAACCTCCTGCCCCCCAGACTTAACAAACAATGGTATAAGCTGGCAGTCCATGGAATCCCCATGGACTATTATGAGGACACTGCCGAGGGTACACAAAAACTGCAGCAAGAAATCGAAACAACCCACAAAGTATGCCTGATGCAACCCCCAAGGTATATCTCCCACCCGGACAACCATGTGGGCAAGACAGCCTCCAGTGTGATGA…
393	609	1989	4459	2471	+	LINE/Tad1	TGGCAGCCCCAGCAATGGCAAGGGAAATTTCCTCTTGCGCCATTGATGACAGCATTGCCATGGGATCAGACCATGAGGTGATCCGCTTCCAAATCAACTCCTTACACCCAGACCACCACAACACAGCCGGCAACACTACATGACTAAACTGGCACAAGACAGATTGGAAAACCTTCACCGAAGAACTGCAATGCCTCACCAAAGCTTCCTACCCCTGGTGGTCCTGCCTCTGAGCCAACCCCTCTGCCGAGAACCTTGATGAATGGGTGGCCCTCCTCCATGACTCTATCCAAACCGCCACCACGATATCAACACCTAACCTCACCCCAACCCTGCGGTCGAAGAGGTGGTGGCCAGAGGTGGTACGCTCGACACACAAAGACATGACCTCAGCCAGGA…
394	609	5070	5622	553	+	LINE/Tad1	GTCAACGAAACCATCCGCATGGGCACGACCACGGAAGTGTTTGACACCGAGCTATAAGCAATCCACGACTGCCTCAAGATGTGCCATGAAATCATCTCCCAGAACCACATCTGATGCCAGTGGATACACATCTTGACAGACAACCAGGCAGCCATCCTCCATGCCTCCCGTACAACCTATGGTCTAGGCCAAGAGCTTGCCCGCACTATACATGACATTGCCTCCTCCCTCTGCTCCCAAAACACATCCGTCACCTTACATTGGGTCCCAGGACATACTGATATACCTGGGTATGACCAAGCCGACCTCCTTGCCAAAACTGCAACCACCCTAACTGCCCCCTCTTCGCTACTGGTCTCCCTGTCCTGGATACATCGACAGATTCATGATCAATACATC…
395	609	161375	161664	290	+	LINE/Tad1	GAATCGTCAACCTAACAACCCAATGCATAAGAATCGGCTAACACCCCCGGACATGGAAAGTAACCAAAAGAGTGGTAATACGAAAACCCAACAAACCAAACTATAGCAACCCTAAGGCGTATCGTATCATATGTCTCCTCAACTGCTTGGGAAAGATTGTCGAGAAGGTAGTCACCTCACTGATTGCGGAAACGATAGACACGAAATAATTCAAGGGACAATTTGGGTGCCGCAACAGACACTCAGTTGTCGACGCCGCCGCCTGTCTCACGGAAGAGATTCACAGAAGC
396	609	161681	164079	2399	+	LINE/Tad1	TTGCCGGAGCCATCCTAATGGATGTTAAAGGTGCCTTTGACCACGTATCGAGGACTCGCCTGACCAAACGACTTGAAGAACTGGACGCCGACCCGAGATTATCCGCTGGACGGATAACTTCATGTGAGACCGCAGGGTATCCCTAATCATAAATGGCCATGAAACCGCTATGAAGGCAACAAACTCCGGAATCCCTGAGGGCTCGCTGGTGTCACCAATCTCGTTTGCCATATATATATCGGGTGTGTTCGAGGAGGTGGAAACCGAAACGGGTGCAGTGGGTATATCATTCGTCGACGACCTCTCCTGAATAGCGTCCGGGGACAACGTTTCGGAAATGGCCGATACCCTCGAAAAATGCGCCCAAATAGCCAGGAAATGGGCAGCCCAGAACGCCGT…
397	612	985	2703	1719	+	LINE/Tad1	CCCCGACCCCCCCTACTGTACAACACACTCCCGCACCTGCTCAACCCTGGAAAGGCACCCCCGCCTCGAAGGCTCTATTCACTGCAGCCCCCAAGCTGAAACAACAGGCCCCAAAAAACCCCCCGAAGAAAACCCCCTGCCCCCAGGAGCTGGTGATCCCCTGCTCTGACCCGCAAGCCCTCCCGGACAGTGCGAAGGCTGCCATCGGAGAGGCCATCAACAAAGCTCTAGGAGCAACTGATGCCCCCACCAATGTAGCCATCCTCATGTTGAGAAAGAACATGTCAGGAAACATCCTGCTCACCCTTCGCCCTGACACCCCCCTCCCCGAACTACTTATCCACCTTCCCCTCATCCAAAAAACAGTCCAGAACATTCACCCCTCCCTGATGCCTCCTA…
398	614	8567	12622	4056	C	LINE/Tad1	ATCACTCTCGACTCCACCATCTCCGACACTGCCACAACCACTCATCAAACCCTCCAATCAATCAACAGAGTTATTAACGAATCACAAGATATCACCCAACCCCCATTCATCCTCGCACGAATCACCAGCAACAACCGCTTAGTGCTTACCACCAATCCCACCACTAAAGCATCCGCCTACGCTCCCTACCTACAGATTATCGCCAACACAACAAAATCACTTAAACCAGTCGAAACCAGAATCAATGAACACTGGACCAAATTCCTCTTCCATGATGTCCCCACCCATGCAGACCTCTCAGCTGTCAAAAATGAAATCGAAGCCACATACCCCTCCCTACACCTTGCACAAAACCCCCGCTGGCTAGTCCCTGCGAACTGCGGCCTTAACAAATCTGCA…
399	626	60	2825	2766	+	LINE/Tad1	CCCCCCTGCCTTTTCAACAACCACGCCGAAATCGGAATATTTTATCGCGGATTACTGTTCGGCAGCCCCGAATTACCTATTCGCAGCATTTCCAGACCAGGCTTTCTGTTTTTCGTTGAGTTTTCAACGAAAAAGTGTTTTCGGGCCCCTGAGAAAAGCCCTGCAAACCCGGTTCCATCAATACTGCACCCCACACACATCAAAAATCATCATTGTAATGGCATAATCCTTGTCGCTACCGCAAAAATACCTTATTCCGAAACTCCGATGCGTCCCCAATCCTCCGCTGTTGGGAAACAGCCCCTCCCCCCCGACAAAGCACCCCCTCAGGCGCTCACGATGAAGAAACTTGCTAACGCAGAGCCGCAAAGGCCCGATGTGTCCGACCCGGAAATGCAT…
400	626	2826	3515	690	+	LINE/Tad1	CCTGGCTTCCCCATTGATGGCAAGGGAAATAACAAACTGGGCGATCGACAATGGAATAGCCACAGGTTCAGACCATGAGGTCATCCGGTTTCAACTAAACTCTCTGTATCCAGACCACACGGGAGCCCCCCTCGCAACTACTCGTCTAAACTGGAACAAAATGGACTGGGATACGTTTACCAAGGAGCTCCAGCTCCGGGCGGATGCCAGCCACCCACACTGGACACACCTCTGCGCCAACCCCTCTGCAAGCAACCTCGACGAGTGGGCTGCCCTACTCCGCGACTCCATACAGAGTGCAGCATCCAAGGCCACCCCGACCCTATCACCCACCCAGCGCTCGAAACGGTGGTGGACAAATGAAATCCGCCACACCCGCCATGAAATGACCACTGCCAG…
401	629	110073	110384	312	+	LINE/Tad1	GGCAGAGGAGGCCATATTAGAGTTCATAAGAAAAACAGGTGTTGGAAAAATCAATGGCGCAAGGGAGCCGGGAGGAGACGTACAAAGCGACGTGGAGGAAAGAAAGGGTTAAAACCCCGGAAAGCATGCGAGCAGTATTTGTTTGTTGGTGGTGAGTGTGTAATACATTGGAGAAGAGAGACGGGGAAGCAGGGGAGCCACATGTGATACCCATCGAGGCAGTGGACGGGATATGGAGAGTGTAGAGGCGGGCGGTTACATACTCAGCAATGAGTGACAGTCGCATAAATAAAATTTGATTCAAAACAAAAA
402	629	249486	251138	1653	+	LINE/Tad1	TCAACCTCCACTTTTTAAAAATTCAAGCACAAAACATCTTTCAAAAACAGACGTCCTCCCGCCTGACAATGACGGAGGACTCATCTAATCGTCCAGAAGATGAAGGAGGCCAAAGAGGCTCTGGAACTGGACCCGAATTCAGCAAATATCGTGAGAAACCTCAAGAAATCGCCTCGGACTTCTCCGACCTTACCAACTTCGAAGACGAAGACGAAGAAGACGAAGAAGACGCAATGGAGATCGAGACGAACAAAGAAACCAACCAATCCAGCGCTATGATCGAAAAGCCAAACCCCGAGATCATCGAAGCGAACCCCCCACTCCCGAACCCCCAACCAACCAACCCCGAGACCCCCGAGAACCTCCCGCAGGCCCTGCACACTGACGTTGAAAACCCCG…
403	630	138	2002	1865	+	LINE/Tad1	CAGTCGCATTCGATGACTCCAAGTCAGAACTCCTACACTTTCATCATGCCCGCACTGACACCCACACAGAGGCCACCAACGTCCAACTGCCCAACAGCACAATCGTCACACCTGGCATGAAGGGTGGCCAAAAAGACATCATCCGATGGATAGGTGTCTACTTCGACCGCAAACTTTCCTTTACCCACCACGTAGGACTTAAGCTGACAGCCACATCCAGATCCTTCAATGCCCTTTGCAGCCTGGTCAGGTACGAAACTGGTCTGTCCCCATCCGCGACCTGCTGACTGTACTGTGCATGCGTGATATCTATGTCCAACTTCGGCGCTGAGATCTGGTGGACCGGGCAGAAAGGCCTTGCTCAGAAACTACAAACCCAACAGAATTCGGCACTTCGAC…
404	631	19822	20647	826	C	LINE/Tad1	ACCTATGAGACCACAGCATCCACATTTTCATGGACAACCAGGTTGCAATACTCCATACTGCATGTCTCTCCCCAGGACCTGGCCAAGAACTCGCCTGAACCATCCACACCACAGTGACCACCCTCCTCCATGCAGGCTCCCTCCTCACTATCCACTGGGTACCTGGACATACTGACATACCAGGCAATGAAGAAGTGGACTGCCTGGCCAAACTTGCCACCTCCTGCACACCATTCATGCCTCTACTAATCTCCCTCTCCTGGTTACGGCACCAAATCGAACATGCATATGTTGAAGGATGGACCTTGTGGTACAACTCCACACTGAAACCCAAGACATATGCTGCACCACACAAGCGCAAGCTGGATGAAGCATACACTACCCTCCCTCGAAAGCTGT…
405	637	1469	4125	2657	C	LINE/Tad1	CCAGCAGTGGCAAGGGAAGTCACACACTGTGCCATTGATGAGGATAATGCCACTGGCTCCGACCATGAAGTCATATGCTTCCAGGTAGACACCTTACACCCCAACCTGGACATGACCTCAACCCAGCCACACCTCAATTGGTGAAAAACTGATTGGGCCACCTTCCCCATGACCCTCCAATGCCTCTCCAATGCCACCCACTCCTGCTGGGTCCACCTCCGCCAACAGCCATTGCCAGCAAACCTTGATGAATGGGCCAATGTGGTATGCGAAGTCATAAAAACTGCTGCCGAGAAATCGACCCCCCTGCTGACCCCCACCCCTCACTTGAAAAGATGGCAGACCACCGAGCTCGAACAAACACTGAGGGATATGTCCTGTGCCCAGAGATGATACAAA…
406	637	4136	5163	1028	C	LINE/Tad1	TGAGGTCCGCCGAGGAGTTCAACACCCTGAAGCATGGCAAAGTCATCATCCTGTTTGAACAGCATAAGGTCATGGAGTGTGTTACATCCTGCTCCATGGACCAGTGCTGCTGATGTCAGAGGTTTCGTGACCACCATGCAACCTGTAATGCAGATCGCAGACCCACCTGTGCTATATGCACTGGTGCCCATTCTACTGACCATCACAGCTGTGCAGAATGCTTCACCTGCAAAGGCTGCTTCTGTACCCATACAGCCCACAAGTGCAGAAAATGCACTGAAGCTGGTCACACCAACAATGCACATGCCTCATACAACACCTGCTGCCCAGTCCAAGTGAAGGCCATCTGTGATGCATGGCAAAGGACAAGAGCTGACCCCCTTACCTCTGACACCTCCC…
407	637	5182	5433	252	+	LINE/Tad1	CACCACACAGCAACCGCTGACCCCCCCTGCATTTTTCTGCATTTTTCAACAACAACCTCAAATTTCCTGGCGCTGCCGACGGAAATCGCCTTAGCGCACACTGTTTACCCCGAATCCCAAATTCCAGGCCCAAATTCCTGTTTACCATTGAGTTTCAGCGGAAAAATGCGATTCCAGGACCACCAGACCGGTGAACGGGCCTGTCCATCAATGCTGCCCCACATCCCGCCCTCCGGTCATCAAACAAACCTT
408	638	9136	9565	430	+	LINE/Tad1	GGGGATATAATGCCAGACATTAAGGAACTCCAAGCCAAGAATATTGCTGAAAAATGGAAGGACTGGGAAAATACCATATGGACTGACAAATCTTGATTGGAGGATGGGAGTGCTGGCTGCAACATAGTATGAAAGGACCCCAAATGAAGATGAAAAGAAGAAGGAACAGACCATGAAACCTGTTGAGATGTTTATGATGCAGAACTGCATGCTATTAAACCAGCAATACAACACTTTGCCAGTAGAGCTGAAGACAACTGACACTACACTGTCATCAATAGTTGGAAATCAGACATCCAATGATGCAAAGATAATAAGCCCTGGCGAGAGTGATTACCAATAGAAGCCCCAAACTCACCAATAATGGATGCTGAGTGAACCTTGGGTCTGTACCAGCAC…
409	639	74778	75119	342	C	LINE/Tad1	AGGACGATAGATGTTTGTGGTGTAATACCAACGAGACAGACCGTTAGGCATCTTTTCAAGGAATGCAGGAAATGGAGGAGCAAGAGAGAAAGATTGAAGAAGAAGATAAAGCCAGGCTTATGGAACCATAACAATATGGCGCATATGTTTGAAAATAAAGAATGTACGGAATATATATTAAAATTTATTCAAGAGAGGGAAGTGGGAAACAAGACGAAGGAGAAAGAAATAGAGGAAAGAGATAAAGAAAGAGATGGAGATAACGGATGGGAAGAGCTCATGGAACACCCGTGGGTGGAAGGACTCGATGATGACGATGAAGATGAGGAAGACGATGAGGAA
410	639	76811	77445	635	+	LINE/Tad1	AACTGCGTACGGAGCATGGCCACTTCGGCTCATTCCTCTGCCGCATGGGCTTTAGAGACTCGGACCGCTGTATCTGCCACAACGGCCCTCGGGAATCACCTCAGCACCTCATATTCCATTGCCCCCGGTACGCCGCAGCCTGCATAGAAGCCTCCCAGCGATGCCGAATACCCTTCCATACGCGCGCCTTCTATACAGCGATATCGCACACAAAGAATTAGTGAGCTTAATTCGAGACACCAAGATTGGCACGAGGAACGAGCGTCAGGAGAAGGAGGCGGAACTGGCAAGAGCGGCGTTAATGGAGGATGAAGTGGAAGAAGAAGAATGGGATGAAGCAATTGCGGTGCGCAATGACGTCGGAGAAGCATGGCTGGGAGAGCATGAAATTGAGTTATT…
411	639	109186	109444	259	+	LINE/Tad1	GCGATCCGCAACACCTCTTCGCAAACAGGGATGCCACCAAGCCGCTGTTGATCTACTTGGAAGCCGCTGAGATCGAACAAGACAGCTGAAAGGGGTATGGAAAGAGCGGAGGAAGAGAGAGACGAACTATGGGGATGGAACGTCCTGGACAAAGATCCAGAAGATAGAGACACAGAGATGGAACGGGAAAGAATGAACAACAGAATGAGAGAAGCGGAGGCATTTATAGCAGGCGTGGTAGCAGAAGCTGAGGCGGCGG
412	643	40	1678	1639	+	LINE/Tad1	ACCATCCCGCCCCCCGCCCCCTGCTACAACCCCCTCATCTGCATCTGCACAGCCCTGGACAGGAGCCCCTGCGTCGAATACCCTCTTCACCTTGGCACCTGCACCCATGAAAACCCACACTCAACCCAAGAAAACCACCAAAAAACCCACCGCTCGCCCCCAAGAACTCCTGATTACCAGCTCCGATCCCAAGACAATCACCGACCAGATCTGAGCGAAGGAAGGTATGGCAACGAACGCCGCCCTCAGCAAAGTCAATGCACCAATCAATGTTGCAGTCATGTCAGTTCATCAGAACATGACAGGCAACCTCCTCCTGACCCCGGCTCCCAACAGCTCAGTACAGGAGCTCCTACAATATGCCGACACCATCTCTGCCACCATCAGCTCTGTCCACTC…
413	643	1679	5052	3374	+	LINE/Tad1	CCTGGCATCGCTGGCAATGGCATGGGAAGCAACAAATTGTGTGGTGGATGACACCCAACCTACCAGCTCTGACCATGGGGTGATCCGCTTCGAGGTCACAATGACAATCCCACACCCCACCATAGTCACCCCACAACCCTGTCTCAATTGGGCGTGCACGGGCTGGGAAAGTTTCTGTGACACCCTCTGCTTGCTCTCGACATCCACACGATCAAAATGGGAGCGACTGCACCTTGACCCAACCCTGCCACACCTCGACAAATGGGCGGAGATACTCCAGGACATCATAACGACTGCAGCCACACATGCCACACCAGTCCTCAACTCCTCCCCCCGCTCCAAACCCTGGTGGACCCCCGAAGTCTCAGCAGCCCGGCAAAACATGCAACAAGCTCACTG…
414	644	1	1346	1346	C	LINE/Tad1	CACCATGCTGGAACCCCCTCTGCCACTGCCCTCTTCCACAATGCCCCCCTAACCCTGCTGAAACACACCCCGAAGACCCCTGCCCCCAAGAAGACTCCCACAGCCAAGAAAATTCCCACCCACTCCCAGGACATCGTCATCCCCTGCCCTGACCCCTGTGCACTTCCGGACATCACAAAGACCCAAATCAGACTGGCAGTGAATGCCACCCTATGTAAGGCAAACATTCCCATGAACATCACTATCATGATGGTTCATAAGAACATCTCTGGTAATCTCCTCTTAACCCCATCCCCTGATAGCCCTGTCTGTGACCATCTTACCCATCTCCCCCTCATCGATGAAGTTGCCCATTCCATGCACCCCTCCCTCCTAACCCCCAGGATGAATGAATAATGG…
415	644	1347	1579	233	+	LINE/Tad1	GGCAACCTCCTCCTCACCCTGTCTGCCCAGACCCTCGCCATTGACATCATGACCCACCTCCCAGTCATCAAGGAAGCTGCCATGGCAGTCCACCCATCCATCTTACCCCCATGCCTCAACATGAAGTGGCATAAACTGGCCATTCATGGGATCCTCATGGATTACTTCCCAGATGACAAGGAGGGCATGGCAAAACTTCAGCAGAAAGTTGAAAGCAATCACTCCATCTCTCT
416	644	1649	2145	497	+	LINE/Tad1	GGAAATCGCCAGATCTTCGAGTGGATTATTGTTCGGCACCCTCAACTTACCTTTTCGCAGCATTTTCAGACCAGGCCCTCTGTTTTTCGTCATGCTACATGGTGAAAAAGAGATCCCTGGGCCCCTGAAGAAGCCCTGCACAACAGTCATCAACACCACAACCCACAATCACCAAAAACTATCAATTTTCCAGCGGAATCCCCGTCTCGCCCATGCAAGATACCTATTCTGAAAATCTAATGCCTCCTCGTGCCTCCACTGTGGAGAAACAACCTCTCCCCCCTGACAAACCTCCCATACATGACCTCGCGAACAGCCAACATGCTAATGCAGAGCCGCATGCTATGCAGAGATGCGACGCGTACCATGACGCGACGCACATTCATGCACAATATGACA…
417	644	2199	2841	643	+	LINE/Tad1	CACACAGCAACCGCTGACCCCCCCTGCATTTTTTAACAACAACCTCAAATTTCCGTGCTCTGCCCACGGAAATCGCCTTATCGCACACTGTTTACCCTGAATCCCGAATTCCAAGCCCGAATTCCTGTTTACTGTTGAGTTTCAGTGGAAAAACGCGATTCTGGGACGTCCGGACCGGTCAACGGGCCTTTCCATCAACGCCACCCCACCTCCCGCCCTCCGGTCATCAAACAAACCTTATTTTCGGTTTCGGCATACCGAAATCCCCCCCTCCCCAAATTCCTCTATCGCCAGCAGCACTGGTTGTGGTGAACCCCAAAATGTCCCTCCTTGAGGACCCCCCTTTCTTTGCGAAAATTTTGTTTTCTCGCTTAACAAGAGCCGCATCACGTGATCCTT…
418	646	137	531	395	+	LINE/Tad1	AGAGAAGGAGCAGAGGTGCGGACGGCGAAGGTGCAGTGGAGGGGGTTGCGTGGGCGAGAGCCGAGGAGTGGAGGATGCGGACGGAGAGAGGGGAGAGAGGGGAGGCGGGGGGGCGGTGGCCTGGAGGAGTCACTTTTTCCTTTGTTCTGTTTTTGCTTTGTGGAGGAAATAAAGACGGAAAAATGGACTTAAAAATGGGAGGGGAAGGGTGGAGGAAATGGGGGATCGACCCGGCGAGGTGGCCTCCGAGCGCACAGGGCTCCTTGGATCTGATGACGCTAGATGAAAAACTGCATGGTGAGACTTGGGAGACTACACTCCCACCCACATTGACAGCTCTGGGGCTTACCCAGTGGGGACCTGGCATCACCCCCAGGTTCTCATCATTGTATTTA
419	646	1113	1761	649	C	LINE/Tad1	CCCCCCTGCATTTTCAACAACCACGCTGAAATCAGAAGATTTTATTGCGGATTACTGTTTGGCAGCCCCGAATTACCTATTCGCAGCATTTCCAGACCAGGCTTACTCTTTTTCGTTGAGTTTTCATCGAAAAAAGAGTTTTTGGGCCCCTGAGAAAAGCCCCACAAACACGGCTCCATCAACACCGCACCCCACACACATCAAAAATCATCATTTTAATCGTGGATTCCTTGTCGCTACCACAAAAATACCTTATCCCGAAACTCTGATGCCTCCCCGATCCTCTGCTGTTGAGAAACAGCACCTCCCCCCCGGCAAAGCACCCCCTTGGGTGCTTGTGACGAAGAAACGCGCTAACGCAGAGCCACAAGCACCTGACGCGTCCGACGCGGACAATGC…
420	646	1977	2200	224	+	LINE/Tad1	AAAGGCAGAAAAATGGTTGAAAAAGGAACGGGAAGGGTGGAGGAAATGGGGGAACGACCCGGCGAGGTGGCCTCCAAGCGCACAGGGCTCCTGGAACAGATGACGCGAGATGGATTATGAACCAAACAGGACCTGGGGGACTACAACCCCACACATGAAGACTGCTCTGGGGCAGATCCCAGTGGAGACGTGGGGTAACAGCCAGGCCCTCAAGTATGTATTTA
421	646	2268	2854	587	+	LINE/Tad1	AATAGATGATGGTATCACCACAGGATCAGACCATGAAGTAGTCCGCTTCGAAGTGAACTCCCTCCACCCAGACTCCAGCATCTGAACCACCACTACCTGCCTGAACTGGTGCAAGACCAACTGGGATACCTTCGTCACTGAGCTGCAAAACCTCTCTGCATCATCCTACCCCCAATAGTCCCACCTCTGAGCAAACCATCTGCCCGCCATCTCGATGAATGGGCGGCCCTTCTATGCGACACAATACGAATGGCAGCCCCAGCTGTGACACCTACCCTGACCCCCTCACCGCGATCGAAGAGATGGTGGACAGAGGAAGTAAGTAGAATGTGGACAGCCATGACAGGCACTCGTCATAAGTGGAAACCAATGCACCTTGCTGAACACCACGAGGAATAC…
422	646	3054	4407	1354	+	LINE/Tad1	ATCACACAGCAACCGCTGACCCCCCCTGCATTTTTTAACAACAATCTCAAATTTCCCCGCTCTGCTGATGGAAATCACCTTATCGCACACTGGTTACCCTGAATCCCGAATTCCAGGCCCGAATTCCTGTTTACCGTTGAGTTTCAGCAGAAAAACGTGATTCCGGGACCTCCGGACCGGTCAATGGGCCTTTCCATCAACGCCGCCCCACCTCCTGGCCTCCGGTCATCAAACAAACCTTATTTTCGGTTTCGGCATACCGAAATCCCCCCCTCCCCAAATTCCCCTATCACCAGCAGCACTGGTTGTGGTGTACACCAATATTTCCCTCCTTTCGGACCCCCCTTTCTTCGCGAAAATTTTCCTTTCTCGCTTAACAAGAGCCGCATCACGTGATCC…
423	651	27648	28372	725	C	LINE/Tad1	GACTCGTCAGCAGCGTTACGAAGAATTCAAGATAATGGCCGGGGCCCAGGCCAATGGTTAGTCAAAAGGATCGCAAAGAGGTAGAAGCTTCTACTTCAAAGAGGATACTCGGTAGAATACCATTGGGTTCCAGGTCATGAAGGGATCCGTGGGAACGAAGAAGCTGACAAAGCCACCAAGGAAGCAGCTACTACCCCGGTAATGAGAGGGGTTAAACGAATTCCAAGAGAAGAACTGTTTACGACACTCGCGCACCTCCACAGAAAGACAAAAGAGAAAAAGACTAGAGAAACTGCAGATTAGCTCCAAAAATCACTTGGAGACCGCCAAGGATATAAGCTGCCAACCACCAAACGACCTGATGAGAAAGCAATGCAATCACAAAAACGGTTAGCTACA…
424	653	16545	17248	704	C	LINE/Tad1	CTTGGCCTACATCAAGTGGGTAACAGAAGATGGTCAATGACAAACAACCAAGAAATGGATTGTAGAAAAAACCAGCAGGAGCAAAGCCTACATCCCAAGGGATAAGACAGATATTAGGAAACACCTAAAAAAACAAAAGAAACAGGTGGTACCCTAATTGTACCAGCTGCTGATGTGCCACATGATCATGGTACCATACCAGAAAAACCAGTTGAAGAAGAGAGACTCAGAGGGTTGCTAGTGGTGTGGGTCAGACAAGAAACAAAACAGACAACACCTGTTCAAGGAATGTAGAAGGTGGAAAATGGAGATTGGAGAGTTGTGGAGCAGGGCGAGAAAGGAAGTTGGATGGAGGAGGGCAAGGTGGAAACCCATTTCTGAGTGTTCTGAGCAGAGAGG…
425	653	21375	21884	510	C	LINE/Tad1	ATGGTTGCAAAAAACCGTTACCGCAATACTAGAGACGTACGCGAAGCCGATAAGGCTCTGCGAACGCTCTAAACCGTGATGGAACTAGAATAGAAAGAAGACAAGAACCGAGGCTGGAAGAGCTTGGAGGAATTACAAAAGAGGAAGGATACCGCACGATGAAGTTAATGCAGCAGACAATTTACATCGAACGATTAGAAGATACAAAAGACGCTGCTGAAACGAATTCCTATCCAATGCTGATGAACAGGATATGTGGAAGGCTGTGAGATTTACCAAAGACCGTCATAAATCCAACATTCCGACCCTTGAAGATACCGATGATTCTCTGGTAGTCAGTACCGAAGATAAAGAAAGAATGATAAGGAAATCGGGATTCCCGGAACCTCCAAGAAGTCA…
426	654	28188	28419	232	C	LINE/Tad1	GGAGGAAATAAAGGCGGAAAAATGGCTAAAAATGGGAGGGGAAGGGAGGAGAAAAGGGAGGAACGACCCGGCGAGGTGGCCTCCGAGCATACAGGGCTCTTGGACTAGACGACGCGCAGACAAACCTGACTGCAGGGACTTGGGGGGCTACACCCCCAAACATGAAGCATGCTCTGGGGCAGATCCCAGTGGGAATCTGGGGTAACAGCCAGATTCCTAAATGTTGTATATA
427	654	43185	43580	396	+	LINE/Tad1	ATTCTTATTCGGAAGCCCCAAATTACCTACCCGACGCCTCCTAAGACCAGGCCCTCTCTTTTTCGTCGTGCAAACGAGGAGAAGGAGAATCCGGGCCCCTGAAGAAGCCCTCGGAGCAGGAGACACCACCCCCCACCAACCCCGCACAACAGAACACCTCGATTTTCCAGTCATTCCCATATCGCAAGACCAACACAACCTTATCCCGAAAACCCGATGGCACCCCGCGCCTCCACCGGCAAGAAACGCCCCATACCCCCCGACAAAATGCCCCCCTTCGACCTCACCTCGAGCCAACACGCTAGCGGAGAGCCGCATGCGATGCAGGAACGCGACGCGCTGAACGACACCATGAACGTCGACTGTGACGTCAGCGACAACGAAACCGCGTCTCCC
428	655	1424	1678	255	+	LINE/Tad1	CATGGCATACGCTGTAGGCTTCGGCCAGATCACCGGGGGTGTCTCCTTTGTTTATTATTTTTATTAGGCGGTATGGGAGTAGGAAACGGGGGTGCCAAGTTGACGTCATTATTTTCATTATTTAGACGGTGGAGAGGAAACTAGGGGAAACACATGTAAGGCCCTTGCGGGGAAGGCCCTCCAGGCAAGCGGCGCCATATTCTAGCTGGAATGCATGCCCCGCTATAGCAAATATACTAATTCAAAACAAAAAAA
429	656	20429	20788	360	C	LINE/Tad1	GGCTGGCGGCATGCAAAGTGGAAACCCATATTGAAGCTTTTCAAGGAGGAGAGGGCAGAAGAAGCGGTATTGGAGTTCATTAGGCGGACCGGAGTGGGAAAAATGAGTGGCGCGAGAGAGCCCAGAGCAGAAGACGAGATTAGCGTAGCGGAGAGTGAGGGTTGACCACCCTGGAATAACTATCATACTTTATTTGTTGTTTGTTATTGTTAATTTCACATATACGGCGGAGAAAGGGGAAGTAGGGCGCCACATGTGATGCCCTAAGGGGCAGTGGACAGGATATGGGTCGGCGAGGGAGGCGGTTTCATACTCAGAAATGAGTGATAGTCGCAGAATAAAATTTGATTCAAAACAAAA
430	656	214722	215627	906	+	LINE/Tad1	ACCGACGGATCGAAACTCGAAAGGGGATACTGCGGATGCGCAGTAGCATGGAAGGTTGACAACCAATGGAGCCTCCGAAAATTCCACCTGGGCGATAACAAAGAAGTCTTCGACACCGAATTCTACGCCATCGCGGAAGCCTTGAGAAATGCCATCGAAAACCACGTCTGGACCGCAGCCCTCACAAGGATCTAAGACGACGGAATGGGACCTGGCCAGTGGATCGTTAAACGGATCGCGAAGCTCGAAAGAGTACTCCTCCGGAGAGGCTATAAAGTAGAATACCACTGGGTGCCTGGTCATAAAGGCATCGACGGCAACGAAGAAGCCAACAGAGCAGCGAAGGAATCAGCGATAACTCCAGTTCCAAGAGGGGTTAAGAAACTGCCAATGGAGGAG…
431	656	327141	330305	3165	C	LINE/Tad1	CGACTTCACCTCCACTTATTAAACTTCAAGCACAAAACATCTTTTAAAGATCCAAAAAGAGACGTCCTCCAGCCTAAAAATGACGGAGGACGCATCTAATTGTCCAGAAGACGAAGGAGGCCAAAGAGGCCCCGGAACTGGACCTGAATTCGGCGAATGTTGCGAGAAACCTCAAGAAAGCACGTCGGACTTCTCCGACCTTACCGATTTCGAACACAAAGAAGAAGACGAAGAAGACACAATGGAGATCGAGACGAACAAAGAAACCAACCAATCCAGCCCTAAAATCGAAAAGCCAAACCCCGAAATCATCGAAGTAAACCCCTGGCCAACCTGGACCCAAGCTCAAGCCACCTGAACCCCCCGCTCCCGAACCCCCAACCAACCAACCCCGAGAGC…
432	658	26040	26266	227	C	LINE/Tad1	TATTTCTTTAGTTTTTTATTCATTTATTATATGGCGGTCACGGGAGTTAGGCGGGGGTGCCAAATTTGACAACTTTATCGTAATTATTATGATTTAGACGGTGGACAGGATACTAGGGGGGGACGCTGTAAGGCCTCTTACGGGGCGGGCCCTTCGGGTAGCGGTGCCATATTCTAGCTAGAATGCATGCGTCGCTATAGCAAATATATTGATTCAAAACAAAACAA
433	658	26332	26568	237	C	LINE/Tad1	GAGAGCATATCTTCAAAGAATGCGGACATTGGAAGGCGGATATCAAGATTCTGTGGAAGCAAGTGGCGCGGGATGTCGGACCGAGGTGGCAGAAGCACAAATGGAAGCCAATATCGGCGTTATTTAATGAGGTTAAAGTGACGGAAGCAATTCTGACCTTTCTGGATAAGACGGGGGTGGGCAAGAAGCCGAGAACGAGGCCGCTGGAGGAGTACGAGGGGGACGAGCCAGAAGAGA
434	659	3	2940	2938	+	LINE/Tad1	ATGGCGGAGTCACACGACCTCCTGCACGATGACCAAATGGGCGGTCACCCTAAGCGCTCAGCAATCGACGCCGCGATGGTGCTAACGCACGATGTCGAAGCGAATGCAGGCCGCCGCCTGATTACGTCATCACTATTTTTAGACGTTAGAGGTGCCTTCGACAACGTCTCCTCCACACGCCTGCTCGACACAATCCGCACCCTCGGCTGCCCCAACGCCGTGCTCTCGTGGTGCACATCTTTTCTAAACGAACGAACCACAGCACTATCCTTTGACGGGGGAACAGATAGCCAGCGCCCAATCAACTCCGGTATCCCCCAAGGGTCCCCCGCCTCACCGATCCTTTTCCTTCTATACCTCCGCCCCCTCTTTGACGCCCTCAATGCAGTGCACCCGACC…
435	659	3007	4076	1070	C	LINE/Tad1	AATGCCTTTACCTCCACACCGGTCTTGGCGCTCCACAATAAATCCGCACTCCCGCCTGTCACAGTGCGCCTTGACAACCGCCAGCGGAAATACGCACTGCGCACCCTGACTTTACCTGCTTCGCACCCGATTATCACACGCTGCCCTGTCTTGTTCCGCACGCCAGGTGTCGAAGATGCCTCCATTAACTCGGACACCGAGTACGACCACCCGTGGCACACCCCAGGAAACGCCCCATCCCACCTCCTCCACATCATCAACACACTGTCCCCGTGGGTCTGACCGAATGCCGAGATCGAGGACACCTCCCAAAACATACCTGACGATGCCCTCGTCCCCACACTGACAGTCGACATCTCCCCCTCTCCAAAGGACAAGGCTGCCGATGACCACCTCCTC…
436	662	381	844	464	C	LINE/Tad1	TGCGATTATCACCATAACCACGCGGAAATCCACAGATTTTCGTGCGGCAGCGTTATCAGCGACCTCGCTTTACCTAGCTGAAGCATCTTCAGACCAGGTCCGCTCTTTTTCATCGTGCGAATGGTGAAAAAGAGATTTCGGACCCCTGAAGCAGCCCCCGGCTACGGACTTCATCACCACCCCTCACCAACAACCACCTCAATCATCGAACTCATGTCATTTCCTCCCTTAATCGACCAAAGTAAACCTATCCCAAAAAGCCAATGGCCCCACGCACCTCTGCTGCCAAGAAAAAACCAATCCCTCCACACAAACCCTCTCTCCCGGTGCTCGCGTCCAGCAGACACGCTAACACAGAGCCGCATACTCAACGCGACATGCAAGAAACAATGCACCTAG…
437	666	115	2126	2012	+	LINE/Tad1	GGAAATCGCCAGATCTTCGAGCGGATTATTGTTCGACACCCACAACTTACCTTTTCACAGCATTTTCAGAGCAGGCCCTCTCTTTTTCATCATGCTACATGGTGAAAAAGAGATTGCCGGGCCCCTGAAGAAGCCCTGCACAATGGTCATCAACACCGCAACCCAGAATCACCAAAAACTATCAATTTTCCAGCGGAATCCCCATCGCGCCTGTGCAAGCTACCTATTCCGAAAATCTGATGCCTCCTCGCAGCTCCGCTGTTGAGAAACAACCTCTCCCCCCTGACAAACCTCCCATATGCGACCTCGCGAACAGCCAACACGCTAACACAGAGCCGCATGTGATGCAGAGACACGACGCATACCACAACGCCATGCATGTTGACATGCAATATGATG…
438	666	2727	3215	489	+	LINE/Tad1	TATCACTCGACTACCGCCTCCCCCTGCGCTCTCAATAACCACCCGGCAATCGCCAGATTTTCGAGCGGATTATTGTTCAGCGCCCCCAATTTACCTTTCCGCAACATTTTCAGTCCAGGCCATCTCTTTTTCAACGTGTTACACGGTGACAAGGAGATCTCCGGGCCCCTGAAAAAGTCCAGCGGCACGGTCATCAAAACCCCCCCCCACAACCACCAAAAATCATCAATTTCCCGGCGGAATCCTTGTCGCACCCGCAAACACTACCTATCCCCACATTCCGATGCCTCCCCGCTCCTCCATTGTGGAGAAACACCCTCTCCCTCCCGACAAACTGCCCACACGCGACCTCGCTACCAGCAAACACCCTAACGCAGAGCCGCAAGACATGCATGCACG…
439	674	44149	44410	262	C	LINE/Tad1	GGCGTCATGATGTCCGCTATGGCCAGATTACCAGGGATGTTTCCTTTTTTTATTTATCACTTTTGCGTGGTCACAGGGATTAGGCGGGGGAGGCACATTTGACGCATGAATGGTATATTATTATATTATGTAGATGGTGGACGGGACTAGCGGGGACGCATGTAAGGCCCCTAATGAGGCGGACCCTTCGGGCAAGTGGCATTATATCCTAGATAGACTGTATGCACCGCTATAGAAAATATGCTGATTAAAAACAAAGAAA
440	674	241031	241258	228	C	LINE/Tad1	TATTTCTTTAGCTTTTTATTCACTTATTATATGGCGGTCACGGGAGTTAGGCGGGGGTGCCACGTTTGACGCCTTTTATCGCAATTATTATGATTTAGATGGTGGACAGAATACTAGGGGGGGACGCTGTAAGGCCCCTTACGGGATGGGCCGGTTGGGCAGCGGTGCCATATTCTAGCTAGAATGCATGTGTCGCTATAGCAAATATAGTGATTCAAAACAAAACAA
441	674	241335	241689	355	C	LINE/Tad1	AGGAATTGGCGTCACGGTATTACCAGCTCATTATGGGGCATGAAGTTATTGCACGCTATCTTAAGCATAACATCAAGACGTCAGACTCTGACACCTGCTGGTGGTGCGAAGAGGATATTCGGCAGACACGGCAGCATCTCTTCAAAGAATGCGGGCATTGGAAGGCAGATATCAAGACTCTGTGGAAGCAAGTGGCATAGGATGTCGGGCCGAGGTGGCAGAAGCACAAATGGAAGCCAATATCGGCGTTATTCAATGAGGTTAAAGTGACGGAAGCAATCCTGGCTTTTCTGAATAAGACGGGGGTGGGCAACAAGCCGAGAACGAGGCCGCTGACGGAGTCCGAGGGGGGCAA
442	674	241948	242989	1042	C	LINE/Tad1	CGGATTCGGCATCAACACTCCGCCGTATCCAAGACCCCCGCCCCGGCCCAGGACAATGGCTTGTAAACAGAATTGCAGAATTCGAAGGCCGGATACTGGACCTAGGGCATACGGTGGAATACAATTGGGTCCCCGGCCATGCCGAGATTGAAGGCAACGAAATCGCCGATAAACTTTTTAAAGCAGCAAAGACGGCAGTATCGACCCCGATACGCCAATAGACAAGACGCCTACAACCCAGGGGACACTTCACGTCCCTAGCCCTCTACACCACCGAAACAAGGAGCAAAGAACGACGGACACCAAGGAGTGGCTGGTTCAAACGCTGAGAGACCGCCCTGGATACACCCTACCCCATTAGCAATATCCAGACAAACTCATGATGACGACCTCCAAACG…
443	676	4	665	662	C	LINE/Tad1	ACATGACACGGCCATTTGCATCCTACCTCCACCGAATGGGCTTCCGTGATAACGATCGCTGCACTTCTTGCCCTTCCAGACCTCGAGAGACTCCTCAGCATCTCCTTTTCCACTGCCCGCGCTACTCCAAAGCACGCCTTATCGCGGCGAAGAAGAGCCGCATTCCACTGCACACCAGGGCCTTTCTCTATAGAGACATCGCATACGAAGCACTTGCGGAGCTCATCCGCGATACACAACTCGGCACTCGCATAGAGAGGGCCACCAAGGAAGAAGAAAGAGAAGGGACCGGGGCGATGGAAGCAGGCGGACTCGGCGCAGACGGAGAGGATCTGGAAGAGGACGACGAAGAGGAATGGGAGGAAGATGAAGAGTTGGTCGGTATGGCGGTAGAGCCGG…
444	676	87573	87850	278	+	LINE/Tad1	ATAGCGGCAATTGTAGCAGAAGCAGGAGCTAGTGGTTATTTATACGAGGACGGATAAGGAGGATTGAAAAGAAGAAGGGCACAGGACAAAGTGCAGCGGGACGTTCAGGTGAAGAACGGACTGTAAATACCAAAGCTGACCCGACGGCGGCACGAAGAGACAGAGGCAAATGTATCAATGAAAGAACGAGAAGAACAGTTATGAGGAAGAAAAAATGGCGGAAGACAATGTATTTAGCATACCCCGATCTGGGGTCATAAGTATGACAAAATCAAAAA
445	677	13967	14831	865	+	LINE/Tad1	CTACGTCCTTTTCCTTAACGATTGCACAGTCACCTTGAGGTGGGTGCCAGCCCACAAGGGGGTAGCCGGGAATGAGATGGCAGAACAGATGGCCAAGAAAGCGGCCGTACACCTGGAGGAGGATGACCGGTTCTCAAAGCAATTTATGAGAGAAGCGAGCTTGGCGTACTTGAAGAGGAAGACGTCAGATATCAAGACGACAGCAGCTAAAGAGTGGATTAAGACCAGCACCTCAGGAAGCAAGGCGTACATCCCACGGGATAAAACGGGAATCAGGAAAAATCTAAAAAAACGAAAGGAAGGAAATTGCATCACGATACCATCAACTCCTCACCGGACATGCGTTAATAGTGCCATATCTGAAAGAAAAGCTTGGAAAGAGGGAGTCGGACACCTGCT…
446	677	104837	105089	253	+	LINE/Tad1	GCGACGGTGATGGATTTTGACGTGGTATTAATACAAGAACCGCCAATTGGAATAAGAGGGAACACTTCATCTGCCACGTTCACAACGTATAGACCGGAGCCCAATATGAAATATAATAAAAGAGAAGCGAGGGTGTGGTATGCCATGTCAAGAAAAGCAGAAAGAGAAAAATACGTATTAGAAGAAAGAGACAACCTGAGCAAGAGCCCAGATATTCAAATCTTTGATGTATACGAGAAAATGTGGATAAAAG
447	677	105295	105809	515	+	LINE/Tad1	GGAAGAAGAGGCAAGGTGAAGAAAAGGAAGGAGGATTAGAATTGGTAACATCTACAACCAACACATTCCAGAAAACCCAAGACATAAAAAGAAAGGAATAATGGAACTCGGGAGATAGGAGGAAATAATAGACGAAAATACCATCCTGGCGGGGGACTTCAATGCCCATGACACAATGTGGGGATCGGCCAAGACCACAAACAGCGCACACATTGTCAAGCTTATCGAAGATTTCAACCTACGCATCGCAAACAACCTAGAGTACACCCGATACGGAACGGAAAACCAGAGGCCCTCAACAATAGACCTAACCCTAACTGCCGGACTGGAAATCGAGCACTGGGAAGTCATCGAAAAAGACGATCATCACACGGAATCGGATCACCGAGTGATAATGTG…
448	678	134528	135018	491	C	LINE/Tad1	TCCCACCTCCACCGACGAACCAAAGAATGAAAACGCAGTGAGGTGAAACAATGGCTGGTAAACACCCTTGGCAGCAGACCTGGTTATATCCTACCGGAACAGACGCCTGACCCCATTGCCATGAGAACAACAAAGAGACTGGCGACGCGATATTTCCAACTGAAGATTTGACACGGCGTGATTACAACACACTTGAAAAGAATCAAGAGCATAGCTGACGACCGCTACTGGTGGTGCAACACACAGGAACGCCAAACGATAGAATACCTGCTGAAGCACTGCCGGAAATGGCGAAGAGAACAAGGAACCCTGCGTAAGGATGTCCCACATAGACTCTGGGAACATTGAGAGATTAGCAATCTGTGTGCCTCAAGATACTGCACAACAGCACTTTTGAAA…
449	678	313421	314150	730	C	LINE/Tad1	CGGAGGCGAGCCTGGCGTACGTGAAGAGAAAAACGTCCGAGATCCGGAGGAAGGCAACGAGGGATTGGATCAGAGCCAGGACTGCGCATAGCAAAGCATACATCCCACGGGAGAAATTGGGGGTCAGAAAGAGCCTGCGGAACGAGAAGAAAGGGGGTGGCGGCACGGTACTACCAACTCATGACAGGGCATGCAGTGATGGAGCCCTACTTGAAAGCTAAACTCAAAAAGAGAGACTCGGACACCTGCTGGTGGTGTACGTCAGGACGAAGGCAAACCCGCGAGCATTTGTTCAAAGAATGTTCACGATGGAAGGGAGAGATCAAAGACCTATGAAGACGGGTAGGGAAGGACGTGGGCTGGAGAAGAGCCAAATGGAAGCCAGCAGCGAGATTATTC…
450	679	32515	33095	581	C	LINE/Tad1	AGAAGAACTTTTCACGACTCTTGCACACCTCCATAGAAAGACGAAAGAAAAGAAAACCAAAGAAACGAACGATTGGCTCCAGACATCACTCGGCGATCGTCAAGGTTACAAATTACAAACCACCGTACGACCTGACAACAACGCGATGCAGGCACCGAAAAGACTAGCCACTCGATACTATCAATTAAAGATAGGGCATACCGTAATAGCGGCACACCTCAAACCGATAAACACCATCGACGATGATAGATGTTGGTGGTGTAATACCGACGAGAGACAGACCGTAAGGCATCTTTTCAAGAAATGCAGGAAGTGGAGGAGCGAGAGGGAAGGATTAAAGAAGAAAATAAAGCCGGGCTTGTGGAGCCACAATGATATGACACACATGTTCGAGAATAA…
451	679	33993	35374	1382	C	LINE/Tad1	TTACCGCCAATCACGCTATGCATAACGGATTGCACGACAACCAGTTGGAACAAAAGGAGCGAAGGAAGTATTGCTGGGCACCAAGAACTCGGCATCATCAGAAAGACTAAACGACATGACCGGATTGCAGGGGACAGAGATGGAACCAACTTATCTCGAAACCGGGAAGCGATTCGAAGGCACCATCATAACAAACCCCAACGAAGACCAGGCCAAGAGGGTGGCCGAAGAGTGGACTGAGTGGAAAAACACCCTATGGACCGACGGGTCAAGGCTGAATGACGGAAGAGTCGGATTCAGGATGCAGCGTGGTATGGAAAGATGGCAGCGGCGAGTGGACGGGGCAGATGGCCCATCTCGGGTCAAACCAAGAGGTCTACGACGCAGAAACCCAAGCCA…
452	680	40796	41317	522	+	LINE/Tad1	TTTTGCATACAGCGGCATCGCACACAAAGCTCTCGCAGAGCTTATTCGCAACACCCAAATAGGCACCAGATTCGAACGTTTAGAGAAAGAAAAGGAAGTCGGTGAAGGAGTAGGGGACCGCGTGATTGGCGGGGGAGAAAACTGGGATGATGACGAGGTGGAGGATGATTTCGCGGAGTTGGGGGAGGAATTGAATGAGACGGAGAACGGACGAGAGCGGGCATACGAAGAAGGCATGGCATGGATTAGAAGGGAATTCGGAGACGGGGATGATGACAAAGACGGCGAAGACGAGGGAGGTGATGATGAGGAGATTTAGAGGCGTTTGTTTACTTCTTTTATTATTATTAGGGTGGGTTAGACGATAGAGGGCACTGGGGATAGACGGAGAGCATTTAG…
453	680	118937	119700	764	+	LINE/Tad1	TAAGGTGGGTACCAGCCCACCGAGGGATGCCGGGCAACGAGAAAGCAAATCAACTGGCCAAGGAGGGAGCCAAACACCCAGAAGAGGATCCGGAGCGAATCACATCAGTGGCGAGCCTGGCGTACATAAAGAGAAAGACGGCAGAGATCCGGAGGAGCGAAACGAAAGAATGGATCCGATCCAGGACAGAGAATGGCAAAGCTTATATCCCACGGAAGGAGCCAGGAATAAGGAAAAGCCTACGAAACGAAAAGAAGGGAGTAGCAACATGGTACTATCAGCTCATGACGGGGCACGCAGTGCTAGCACCCTACCTAAAGAACAAACTGAAGAAGAGAGAATCAGAAGATTGCTGGTGGTGTGAGTCAGGAAAGAAACAAACAAGGGAACACCTCTTTA…
454	684	43	359	317	+	LINE/Tad1	CACCTCTTCTTAGAGGAGCTCATAGATGACCATGACCTATGACATGTCAGGGATTGGCAAGAAACCCAGAGGCAGACAGGACAACAGCAGCATAGTGGTCTTGACCTGGTCTTCACAACCATGGAGCCAGAACCCCATACAATGGCCTGCAGACTGGATGACCTGGCCCATGCAACCCTTTGACACCATGAGGCAATCTGGTGGGTAGTAGACACAGGATGACATACTGAGGAACCCAACCTCTTCACTCAAGGCTGTGCAGTCAGTGAGTGGCTGAAAGACAAAGACAAACTGGAGGCTGCTGAAAAGGAGTGGCA
455	685	2	1348	1347	+	LINE/Tad1	AGTCTCCTCCAATCATCCCTCACCACCACCTTCGCCATCTGCCAACTCAAAGAACGATCCGAATACCACATTGAATGGGGCAAACACTTGGGCCTACGTTTCTCACCACCAAAATCAGAACTTCTCCACTGTCTCCCCAGAAATAGCAAAAACAAAGCAAAAGACCTCTCCCACCACCCAACCCTCACCATTGACGATAAAATAATTCAACCAAGCCACAGCATCAAATACCTCGGCGTCCACATCGACGAATCCCTCACCTTCAAACTACATGCCACCTCAGCTACTGCTCAAGGAAGAACGGCACTTAGCTCCCTACTTTTCCTCTGACACAAAGGCAATGGCATACCNNNNNNNNNNAGTGTCCACATCAACGAATCCCTCACCTTCAAACTACAT…
456	691	9482	13250	3769	C	LINE/Tad1	ACTTGCCGCCCCAGCAGTTGCCAGGGAAGTATCCAACTGGGCAATTGACGAGGAGAACCCCACCGACTCCGACCACGAAGTCGTCCTCTTCCAGATATCCTCCCTACACCCCGATGCAGAACACGACACACCAGAGCCCCGCCTTAACTGGCGCAAAACAAACTTGGACATGTTCACGTCCACCCTCCGCGAACTCTCCGCCAATAACCAACCCCTTTGGAGCACCACGCGCACAAACCCCACCGAACGCCAGCTCGACAACTGGGCAGTCCTCCTCCACAATATTATCACCAATGCCGCAGCACAGTCTACCCCCGCTCTCGTCCTCTCCCCATGATCAAAACAATGGTGGTCCCCAGAGGTGGAACACACAAGAGTGGCCATGACCAGCGCTCGCCA…
457	691	13251	16027	2777	C	LINE/Tad1	CTCCCCCCCCTACATTTTCACCAACCATGCTGAAATCTCCAGATTTTCCGGCGAATTCAGCTTCACCGACCCCGATTACACCTTGCTGGAACTTTACAGGCCTGAAATCCACCTACTCGTGGTTTTCCAATGCATTAGGGGACCTCTGGACACCCGAAGCTCAGCAACAGGCAACAATCATCAACGCTTCCCCACCAAAACACCCTCAAAAGCCCAAAAACTGGCAAATTCATCCTCGCCTCACCGAAAACTACCTATACGAAAATTCACACCCTCTACAACCCAGCCATTGCCCCGCACTCAACCCCCTCAGTACCCACCTCCCCCCACACACAAAATCTCTTCGCTTGCTTACCCAGTGCCCCACCCATGTGACACCATGTAGTCACCCCTGGCATC…
458	691	21875	25635	3761	C	LINE/Tad1	GCTGCCCCAGCAGTTGCCAGTGAAGTATCCAACTGCGCAATTGACAAGGAGAACCCCACTGGCTCTGACCATGAAGTCATCCTCTTCCAGATATTCTCCCTACACCCTGACGCAGAACACGACACCCCAGAGCCTGGCCTTAACTGGCGCAAAACAAACTGGGATACATTCACGTCCACCCTCCGCGAACTCTCTGCCAATAACCAACCCCTTTGGAGCACCGCATGTGTGAACCCCACCGAACACCAGCTCGATGACTGGGCAGTCCTCCTCCGCAATATTATCACCACTGCCGCAGCACAGTCTACCCCTGCACTCGTCCTCTCCCCATGATCCAAACGATGGTGGTCCCCACAGGTGGAACACATGAGAGCGGCCATGACCAGCACTCGCTGCAAG…
459	693	10	829	820	+	LINE/Tad1	CCTGAAGCGCAAACGAGTTATGGTACTCTTCAAGCCCCAGAGAGTCACTGAGTACCACTCTGCCCAACAGACTGACCAGTTTCGGCACTGCTTGCTCTTTGGCCACCACTACACCAACTGCACTGGATCGCAAGGCCCCAACTGCGGCATCTGCAGCCAAAACCACTCCACAGATGACCACGGTTGCAACCAGTGCCCCCAAGGTAAAGGTAAGACTTGCGAGCACACCAAATACCACTGCAGGAACTGCGTAGACGCCGGCCTCCCCGATCTTGACCACCCCGGCTTCAGCAAACAGTGCCCCGTACGACTTCGCATCTTCAAAGAAGCCTGGACAGGATCACAGAACCCCGCCACCACCCCATCCAACCCCGCCAACAAGGACACTGAGATGAATGC…
460	693	862	1602	741	+	LINE/Tad1	ATACATGCCTTCACAGACAATCAAGCTGCGATTCGCCGAACCTCCCACGTCTGCTGCAGCCCTGGCCAGGACCTCGCCCGGGCCATCCACCACACTGCCCACGACCTTCATGAATTCGGCACTTCCATTACCATCCGCTGGGTCCCAGGACATACCAATGTGCCCAGGAACGAAGCTGCTGACGAACTGGCTCAACAGGTGACCACAGTCCCACCACTTCGACAACTACCGATATCCCTCACCTGGATACAGCGCTGCACTCAAGAACGGTACACCAAAGACTGGGCTACCTGGTTTACCTCATCCCCTCATCCACGCACGTATGCCGCTACACACCGCCGCAAGATGGATGCAGCCTACACCGACAACCCCCACTGGATATTGACTGCAATCCTGCGT…
461	693	2071	2855	785	+	LINE/Tad1	AAACCTACTGCCCCATTGCCTTGCTGAACTGTCTAGGTAAAGTCCTGGAAAAACTTATGGCAACGCGGCTAGGCCTGATGGCAGAAGCACATGATCTGCTACACCCCGATCAGATCGGCGGCCAACCCCTGTGCTCGGCAATTGACGCCGCTATGGCTCTAACCCATGATATTGAAACAGCCACCAAAGACAAACTACTGACATCAGTGCTCTTCCTCAACATCTGAGGCGCATTCGAAAATGTCTCTTCAGCACGCCTCCTCCACACAATGCATCAATTAGGCTGCCCGCGACAAGTCCTATCATGGGGAGAATCCTTTGTCTGCAGCCACACAATTGCTCTCTCCTTCAATGGCCGCACTGACATACAATGCCCGATCTCCACCGGAATTCCCCAAG…
462	694	2898	3282	385	C	LINE/Tad1	AGAGGAAAAGGGGCCTGGAGAGAGACAAGGAGGGGAGACAGAGGGCAGGGAGTGGCAAGTGAGAGTAGCCAGGAGGGCACGGAGAAGGGGAGAGAGAGGAGGAGGTGAGGGGCACAGGTGGCCTGAAGGTGTTATCTGATTTCTTTTGTTTGGTAGGAAATCAAGGTGGAAAAATGGTTAAAAATGGAAGGGGAAGGGTGGAGGAAATGGGGGAAGAACCTGGCGAGGTGGCCTCTGAGCACACAGGGCTCCTGGAACAGATGACGCCAGATGGATTGTGAACCAAATGAGACTTGGGGGACTACAACCCCACACATGAGGACTGCTCTGGGGCATATCCCAGTGGGGACCTGGGGTAACAGCCAGGTCCTCAAGTATGTATTTA
463	701	7414	7759	346	C	LINE/Tad1	CAAGTCGGATGTGGAGCCGCCACATATGAAGTCACAGCAAGTGGACTACAAAACCTCTGGACACAAAGTTTCAACCTGGGTTCACAATGCGAGGTCGCTGACGCCGAACTACATGCCATCTACAAAGGACTACAATTGCTACCCGACTACCCCAAAACATACTGCGCGCCCATTTATATATGCACCAACAACCAATCTGCGATACAAACACTTGCCCACAATGACCTAAACCACCAATTTGCCCGCGATGCCCTCAACCGAGCCCAAGAACTCCACTCCAATGGCTGGACCCTCCACACATTATGGATACCCTCCCACTGCAATATCCCGGGTAATGAACTGGCCG
464	702	3	406	404	C	LINE/Tad1	ATCACTCGACTACCGCCTCCCCCTGCGCTCTCAATAACCACCCGGCAATCGCCAGATTTTCGAGTGGATTATTGTTCAGCGCCCCCAATTTACCATTCCGCAACATTTTCAGTCCAGGCCATCTCTTTTTCAACGTGTTACACGGTGAAAAGGAGATCTCCGGGCCCCTGAAAAAGTCCAGCGGCACGGTCATCAAAACCCCCCCCACAACCACCAAAAATCATCGATTTTCCGGCGGAATCCTTGTCGCACCCGGAATCACTACCTATCCCGACATTCCGATGCCTCCCCGCTCCTCCGTTGTGGAGAAACACCCTCTCCCTCCAGACAAACCGCCCACACGTGACCTCGCTACCAGCAAACACACTAACGCAGAGCCGCAAGACATGCATGCATGCG…
465	702	765	2685	1921	+	LINE/Tad1	TATCACTCGACTACCCCCCTTCCCTGCATTCTCAACAACCACCCGGCAATCGCCAGATTTTCGAGCGGATTATTGTTCAGCACCCCCAATTTACCTATCCGCAACTTTTTCAGCCCAGGCCCTGTCTTTTTCATCGCGTTACACGGTGAAAAAGGGATCTCCGGGCCCCTGAAGAAGTCCAGCAGACAGGTCATCAACACCCCACCCCACAAACAACACAAATCATCGATATTCCGGCGGAATCTTTGTCGCATCCACAAACACTACTCATCCCGAAATTCCAATGCCTCCCCACTCCTCCATTGCGGAGAAACAACCTCTCCCTCCCGACAAACCTCCCTCACGCGTGCTCGCCAACAAAAAACGCGCTAGCGCAGAGACACACACTATGCAGGAACG…
466	710	688	1729	1042	C	LINE/Tad1	GGTTCCTGACCACATCTCCATCATGACGGTCAAACGAAACATCAACAGAAAACTCATGTTCACCCCCTCCCCACAAACCTCACCCAAAAAACTGACCCCCCACCTGCCCCGAATCCTCGAAGCTGCTCGGCGGGTACATCCCTCTTTGCTCCCCCCTAGGCTCAACGAAAAGTGGTACAAACTGGCTGTCCACGGTATCCCGACCAACTTTTTCCCAGAGACTGAGGAAGGCATGACGCGCCTGAAGAATGAGATCGAACGCAACCACAATGTCAACCTTATGCAGCTACTGCGCTACATGTCACACCCAGAGAAGAGGGCTGGTAAGTTAGCATCGAGCATAATGATAGCTCTCCAGTCTAGTGACGGATATAACACTCTCAAATGCAGGAAAGTTGT…
467	710	1730	2535	806	C	LINE/Tad1	AACCACACCGAAATCAGAATATTTTATCGCAGATTACTGTTCGGCAGCCCTGAATTACCTATTCGCAGCATTTCCAGACCAGGCTTTCTCTTTTTCGTTGAGTTTTCAATGAAAAAGTGTTTTTGGCCCCTGAGAAAAGCCCCATGAACCCGGTTCCATCAATACCACACCCCACACACATCAAAAATCATCATTGTAATCACGGATTCCTTGTCGCTACTGTAAAAATACCTTATTCCGAAACTCCGATGCCTCCCCGATCCTCCGCTGTTGAGAATCAGCCCCTCCCCCCTGACAAAGCACCCCCTCGGGCGCTTGCAACAAAGAAACGCGCTAATGTGGAGCTGCAAAGGCCCGACACATCCGATGCAGAAATGCACATAGATACGTGCTCTGATA…
468	715	698	1073	376	C	LINE/Tad1	ATTCTTATTCAGAAGCCCCAAATTACCTACCTGATGCCTCCTAAAACCAGGCCCTCTCTTTTTCATGGTGCAAATGAGGAGAAGGAGAATCCGGGCCCCTGAAGAAGCCCTCGGAGCAGGAGACACCACCCCCCACCAACCCTGCCCAACAGGAGACCTCAATTGTCCAGTCATTCCCATATCGCAAGACCAACACAACATTATCCCGAAAACCTGATGGCACCCAGCACCTCCACCAGCAAGAAATGCCCCATACCCCCAGACAAAATACCCCCCTTCAACCTCACCTCAAGCCAACACACTAGCAGAGAGCCGCATGTGATGCAGGAATGCGACGGGCTATACAACACCATGACAGTTGACTGTAAGGTCAGTG
469	722	1481	2424	944	+	LINE/Tad1	CCCCTCTGCATTTTCAACAACCACGCTGAAATCGGAAGATTTTATTGCGGATTACTGTTCGGCAGCGCCGAATTACCTATTCGCAGCATTTCCAGACCAGGCTTACTCTTTTTCGTCGAGTTTTCATCGAAAAAGCGTTTTCGGGCCCCTGAGAAAAGCCCCGTGAACACGGTTCCATCAACACCACACCCCACACACATCAAAAATCATCATTTTAATCGCGGATTCCTTGTCGCTACCGCAAAAATACCTTATCCCGAAACTCCGATGCCTCCCCGATCCTCCGCTGTTGAGAAACGGCCCCTCCCCCCCGACAAAGCACCCCCTCGGGCGCTCGCGACGAAGAAACGCGCTAATGCAGAGCCGCAAGCGCCTGACGCGTCCGATGGGGAAATGCAC…
470	725	1380	2876	1497	C	LINE/Tad1	CACTACACAGAACCGCTGACCCCCCCTGCATTTTTTAACAACAACCTCAATTTTCCCAGCTCTGCCGACGGAAATCGCCTAATCGCACACTGTTTACCCCGAATCCCGAATTCCAGGCCCGAATTCCTGTTTACCGTTGAGTTTCATCGGAAAAACGTGATTCCGGGACCTTCGGACCGGTGAACGGGCCTTTCCATCAACGCCGCCCCACATCCCGCCCTCCGGTCATCAAACAAACCTTATTTTCGGTTTCGGCATACCGAAATCCCCCCCTCCCCAAATTCCCCTATCGCCAGCAGCACTGGTTGTGGTGAACCCCAAAATTTCCCTCCTTTCGGACCCCCATTTCTTCGCAAAACTTTTTTCTCGCTTAACAAGAGCCTCATCACGTTATCCTTC…
471	725	2892	3754	863	C	LINE/Tad1	CCCCCCTGCATTTTCAACAACCACGCTGGAATCGGAAGATTTTATTGCGGATTACTGTTCGGCAGCCCCGAATTACCTATTCGCAGGATTTCCAGACCAGGCTTACTGTTTTTCGTTGAGTTTTCATCGAAAAAGAGTGTTCGGGCCCCTGAGAAAAGCCCCGCGAACACGGTTCCATCAACACCGCACCCCACACACATTCAAAACTCATCATTTTAATCGCGGATTCCTTGTCGCTACCGCAAAAATACCTTATCCCGAAACTCCGATGCCTCCCCGATCCTCCGCTGTTGAGAAACAGCCCCTCCCCCCTGACAAAGCACCGCCTCGGTCGCTCGCGCCGAAGAACCATGCTAACGCGGAGCCGCAAGCACCTCACGCGTCCAATGTGGAAATGCA…
472	725	3787	4886	1100	+	LINE/Tad1	GTCCACCCCCCAGTTATATGACAACTGCAGAGAAACGTGTGGGCAAGGAAGCATCCAGTGTGGTAATCGTGGTGCGTGCCGCCGAAGAGCTTGCAATCCTGAAGCGCAAACGAGTTATGGTACTCTTCGAGCCCCGGAGAGTCACCGAGTACTACTCTGCCCGACGGACCGACCAGTGTCGGCGCTGCTTGCTCTTTGGCCACCACTACACCAACTGCACTGGATCGCAAGGCCCCAACTGCGGCATCTGCGGCCAAAATCACTCCACAGATGACCACGCATGCAACGAGTGCCCCCAAGGTAAAGGTAAGACTTGCAAGCACACCAAATACCACTGCAAGAACTGCATAGACACCGGCCTCCCTGATCTCGACCACCCCGGCTTCAGCAAACAGTGCT…
473	725	4898	7211	2314	+	LINE/Tad1	CGCCCCATATGGCAGAGGAAACAGTTAACTGGGCAATTGATGATGACAACGCCATGGGGTCTGACCATGAGGTCATACGCTTCGAGGTACACACAACCCACCCAGATGCTGAAACAACTCCCCCGACAAACCGACTGAACTGGAAAAAGACGGATTGGGAGCAGTTCACTGAGACCCTCCGTACCTCTTGCTCAGCCCTCACACCGACCTGGACACACTATCGCAACCACCCCACCACGGCCAACCTTGATGCGTGGATGGAGTCAATACGGGATGTCATCCTTGATGCTGCAACGACGTCCACCCCCATACTACAAGTGACCCCCCAATCGAAATGATGGTGGACCCCAGAAGTCACCGCGGCAAGAAAGACAATGACCAAAGCGAGACGTAAGTGGA…
474	729	5833	6177	345	C	LINE/Tad1	GGAGAGAGGAGACGATGAGAAGGGGAGAAGGAGGAACGGAGTCGGAGTGCAGAGAGAGGCACGGAAGGGAGCAGGGTGATGACGAGGGGACGTTTCTTTTGTTCACTTCATTTCATATCCTATGTACTTTGCTTTCAGAGAAAAAAAAAAAAAAGTGGGTGATTAATGGGACGGGGAAGGGAGGAGGACAGGGAGGATTACCCGGCGAGGAGGCCTCCGATCAAACAGGGCTCACGGACCAAACGACAAGAGATGGAAAGAACCAACAGACACAGCAGGGGGGCTACAACCCCACCCAGCAAGACCGCTCTGGGGCGTTACCAGTGGATACCAGGAGTAACTCCC
475	733	107308	108306	999	C	LINE/Tad1	TGGAAAATGGATACTGCGGATGCGCGGTAGTATGGAAGGTTGACAACCAATGGAGCTTCCGAAAATTCCATATGGGCGATAATAAGGAAGTCTTTGATGCCAAACTCTACGCCATCGCAGAAGCCTTGAGAAACGCCATCGAAAACCACGTCTGGACTAGAATCTCCAAGAAAACCGCCAGAATCTTTACCGACTCAACTGCAGCTCTCACAAGGATCAAAGACGACGGCATGGGACCGGGCCAGTGGATCGTTAAAAGGATCGCGAAGCTCGAAAGAGTGCTCTACCGAAGAGGTTACAATGTGGAATACCACTGGGTGCCCGGACACAAAGGGATTAATGGCAACGAAGAAGCCGACAGAGCAGCGAAAGAAGCAGCGTCAACCCCATTTCCGAGAG…
476	737	40	669	630	C	LINE/Tad1	ACCTCTCCACCGCAATCCACAACCCCGGTGAATACAACTTCAACTGGACCCAGCCCCGCCGGCACCCCTCCCGTCTCGTTCGAATACTCCACACCCTCCGCCAATGGGTACTCCCGGATGATGACATCGAAGACACGGCGCAACCAACATCCACCCCATGGGACGCACCCCCCGTTACGGTAGACATCTCTCCCCTACCCAAAAATGAGGCCGCCATCACGCACCTATCCCTCCTCTGACACCTCCACCAGAACCCCCGTAATGTCGTTGCATACACCGATGGCTCCCAACTGTCCAACAACACTGGAGCCAGGTACTACATCCCTTATGGCCTCCCCCAACCTGTACTCGCAATCATCCCCATGGGTAATACCTCCGAGGTATTCGACACAGAACTAA…
477	737	866	2727	1862	C	LINE/Tad1	CGAGCAACCGCCACATAAAGAACTCTGAACGCACTTTGTAGATTGGCATGGTACGAAACAGGACTGTCCCCCACTGCTACAAGACTAATCTACCAGGCGTGTGTCCAGTCGAGATCAGACTATGGCGCAGAGATATGGTGGAACCAACAAAAAGACCTTGCCTGCACCCTCCAGAAACAACAGCAAACCGCCCTCCATAGGATCCTCAACGCCTTTACCTCCACACCGGTCTTGGCGCTCCACAATGAATCCGCACTCCCACCCGTCACAGTGCACCTCGACAACCGCCAGCGAAAATATGCACTGCACACCCTCACTTTACCTGCTTCGCACCCGATTATCACATGCTGCCCAGTCTTGTTCCCCGTGCCAGGTGTCGAAGATGCCTCCATCAACTCG…
478	741	204	2187	1984	+	LINE/Tad1	GACAGGTGTATGCAGCTATACCGGAACACATCAATGCCTTTTACATGAAGCTCGGAGAGGTGGGATACCACCCCAAAAACTGGTGGCAAGCCACCACTGTCATTACACCCAAGCCCAACAAGCTGAATTACAGCTCTATCAAAGCATACCGACCGATTGCCCTGCTAAACTGCCTAGGAAAAGTATTAGAGAAGCTATGGATTCGAGGCTGGCCAAAATGTCGGAGACATACAACCTACTACACCCCGACCAGATCGGCAGTAGACCCCAGCACTCGGCTATCGATGCAGCGATGGTGCTCATGCACGAGGTCGAAGTGAGTGCAAGACAGAAGTTGATAACATCATGGCTTCTCCTGGACGTCCGAGGTGCCTTCAACAATGTCTCATCTACCCGCCT…
479	741	2227	3086	860	+	LINE/Tad1	ACCACACATCAACCGCTGACCCCCCCTGCATTTTTCAACAACAACCTCAAATTTCCCGTCGCTGCCCACGGAAATCGCCTTAGCGCACACTGTTTACCCCGAATCCTAACTTCCAGGCCCGAATTCTTGTTTACAGTTGAGTTTCAGCAGAAAAACGCGATTCCGGGACCTCCGGACTGGTGAACGGGCCTTTCCATCAACGCCACCCCACATCCCACCCTCCGGTCATCAAACAAACCTTATTATCGGTTTCGGCATACCGAAATCCCCCCCCCCAAATTCCCCTATCGCCAGCAGCACTGGTTGTGGTTAACCCCCAAATTTCCCTCCTTTCGGACCCCCTTTCTTCGCGAAAATTTTTTCTCGCTTAACAAGAGCCTCATCATGTGATCCTTCGCC…
480	742	10661	16899	6239	C	LINE/Tad1	AAATGGCGCTAAAAAACCACCAACTTTTTCGTGTAACCTTCCTGCTTTGGAAAATTCACAGCCCTCTCATGGCTTCATTTTTGCCCCCCCTCAATGGCCCCGCGGACCACAGTGCCTGTAGGCACTGCCGAGTCACTGTACCATGGTTATGTGAAGGGCTTGCATAGCAAACATCCTCCTGCTGCTCATATGGCAGCATGAACCCATCTAGCCATCCCCGCAGTGCCGCAGCTGTGGATGTCTTCTCCACCCCACACACGGTGGCCACCCCAACACCCCTCCTCACAAAGCTGCAGCACTCGCAGCATGGGCCACTTGACTTCAAGTCCCTGCAACCAACCCCAACCCACTTGCTTGCCACGAGAGGTAAATGACCTGCTGATGTCTCAGCGGACACCT…
481	743	37	1047	1011	C	LINE/Tad1	CGTCACTGATGCTACTGCTGTTGCCACCCAGGCCTGTGAAGCCATCAACAAAGTCATCCAGGAATCTCCTGATATCACATCACCCCCCTTCATCTTGGCCCGCATCACTAGCAACAACAGACTAGTGCTTACCACCAACCCCACCACTAAGGCCAGTGAATATACACCATACCTGCAAATTATGACCAATGTTACAAACAACCTCAACCCCTCTAATGCCAGAATCAATGAATGCTGGACTAAATTCCTCCTGCACAATGTCCCCATTAATGCCAACCTCTCTATAATCAGAAATGAAATTGAATCTACCTACTCCTCCTTCCACCTCAGACAAGACCCCCACTGGCTTGTACCTAGTGAGCGCTGAGCTACCAAAACTGCCTCCACACTTGTCATCTC…
482	743	1277	3956	2680	+	LINE/Tad1	CCCCCCTGCGTTCTCAACAACCATGCTGAAATCACCAGATTTTCGAGTGAAATCACATTCAGCATGCTCAATTTGCCTTACTGCATCGATTTCAGATCAGGCTCCCTCTTTTTCAGCATGTTATATGGTGTAAAAAGGGATTCCTGGGCCCCTGAAAGAGACCTGCAGTGCGGCCATCAACACCCCACCCCACAACCACCAAAAACCATCCTTTTTCCGGCAGAATCGTTGTTGCGCCCACAAAAACAAACTATCCCAAAACCCCCATGTCTCCCTGCCCTCCCATGGTGGAGAAAACCCCCACCTCTGGAGCAAAACCCCCCCCTCGTGACTCTGCAACCGAAAAACATGCTAGTGCAGAGCTGCAGCGCCTGCAGAAATGCGATGCACATGCCGACG…
483	743	3961	7973	4013	+	LINE/Tad1	GCGGCGCTGGCAGTGGCAAGGGAAGAGACAAACTGTGCTGTCGATGAGCACAATGCCACTGGCGCTGACCATGACATTGTACGCTTCCAGGTAGACACCTTACACCCCGACATAGACACAACCTCAACCCAGCCATGCCTCAATTGGCGAAAAACTGATTGGGCCACCTTCACCACGACCCTCCAACACCTCTCCAACCCTGCCCGCTCCCGCTGGGTCCACCTCTGCCAACACCCCTTGCAGGCGAACCTTGATGAATGGGCAAATCTGCTGCATGAAGTCATAAAAACCGCCGCCGAGATATCCACCCCCCTGTGGACCCCCACCCCTCACTCAAAAAGATGGTGGACCATGGAGCTCGAACAAACGCAGAGGGATATGTCCCATGCCCAGAGATGA…
484	743	16790	17708	919	C	LINE/Tad1	GAAAGTCAGGCCTCAGCTCCCTGCTCTTCCTCCGACACCGATTTAATGGTCTGAACACTCACATGGCATGACACCTCATCCTTACCCTCATCCTCCTGAAAATGCCTTTGGCCTCACCAGCATGGTAGAGTGGCAAGGACTCCACCCTATGCCCCCTTGCTGTTGGATATCACAGCACAATATGATTGGCCACCAGACTCTCCCTAAGCACTAACATCATGAAATAACTCACCTGTGAACATTGACTACCACTACATACATACCTTGATTACCTCTCAGTACAATGCACCCTATGACTCCTGTTCCTGCTACCAAATCATCCCCTGTCAGGCTTACCACCAACATCCAAATGCCCAGCCACAGCACAAGGACTTTCTCATCTTCGGCAATACATACAGC…
485	744	81144	81392	249	C	LINE/Tad1	AGGCTACGGCCAGGTTACGCGGATTGTTTATTCTGTCATTATTTCTATTAGGCGGTCACGGGGATTCGGCGGGGGTGCCACAGTTGACGGCTTTATCGTATTATTATTAGTATGGTTTAGACGGTAGACAGGACTAGGGGGGGGACGCATGTAAGGCCCCTACGGGGCGGGCCCTTCGGGCAAGCGGCGCCATTTTCTAGCTAGAATGACGCACCGCTATAGCAAATATATTGATTCAAAACAAAAAAA
486	744	95339	96713	1375	C	LINE/Tad1	AAGCGAAGGACGAGAAGCCAGTAACAAAACCGGCGTAATTTTCACCAATGGATCACGACTGGACACGGTACACACAGTATGCTCAGTAATATGGAAGAAATTCAATCAGGAATGGCATCAAGAAAGATAACATCTGGGAAGCCGAAAAGAAATCTTCGACGCAGAGCTATATGCTATAGCGGAAGTCCTGAATCTGACCTACAGTAAAAACATCAGAAACCCGGAAGAAACAGAGACGGTACAAATATACACCGACTCAACAGCAGAGCTACAACGGATGCAAGATCCAAATCCAGCACCAGGCCAATGGATCGTACATAAGATCGTAGAGATGGAAAGACAAATCATGGAGCTAGGACATAAGATGGAATACCGATGGGCCCCCGGGCATGAAGACAT…
487	744	99000	100415	1416	C	LINE/Tad1	TCATAGGCAATCACGCTACGCCCAGAGGATTCTCCGACAACCCGAGAAAACTAGGGGAGCGAAGGAAGTGCTATTGGCGACGGAAAACTCGGCACTATCTAAACGACTTAAAAAGATGAGTCACCTAAATCGAGACAGGATGGAGAAAACCTACCTGGAAATGGGAAAAACGTTCATGGGGGAAATCATGCCCCACACGAACGAGTCAGAAGCCATGAAGTTCGCCGAAGAATGGACAGACCGGGAAGACACCGCTTGGACAGATGGATCCCGCTTGGACGACGGCCGAGTCGGATGCAGCATTTTATAGCAGGAACAAACAGAGGACAATGGCTGGATGGGCCAAACCATCCACCTCGGCATGAACAAAGAAGTATACGACGCCGAACTCTTTGCCAT…
488	744	141182	143349	2168	+	LINE/Tad1	GCTGTGGGCAAAGACGTAACAAAGATAACGGACATCCTGACACAATGCGCAAAAGCAGCAAAAGCTTGGGCAAACAGAAACGCCGTGGAATTCGACGTCGCAAAGACGGAGGCGGTGATATTCATGCGGAATAAAAGACGCAGGGCCATGACGATAAACCTAGAGGACGGCATACAAATAAAGTACAATAAAGGCGCAACCAGATGGCTCGGCATCTGGCTGGACTCCGCGCTGAATTTTAAAGACCATCACTCCAAAAGAATGGCAAAAGCGCACCACATGGAAAACCAAATCAAACGCTTACATACAAAATTTGGAATGACCCCCGCGAACATTAGACGGATCATGATAGTTACTGTACAATCATCGGCACTATTCGGAGCAGAAATATGGTGGCAC…
489	746	5574	7245	1672	+	LINE/Tad1	CAGCAGAGAGCCGGCTACGAAGACTGGTGAGCAAGTACGGAGTACCCCCAGTGAGCGCCCGGAATATCCAGATAGCAATCATCCAATCAACCCTGTGATATGGGTTGGAATTGAGCTGGAGCGGAAAGGCACCTGAAGCCAAAGATTACCAATTGGTAATTAACAGGATGGCTAAAGGCACCACGGGAATGCTCCAGTCAATGCCACTTGGAGCGCTGATCGCAGAAAGCGGATTAACTCCGGCAGCGGCATTGTTGGATCATAGATAATCACGCTACGCCCAAAGAGTTCTCAGACAACCGGAAGAAACGACAGGAGTGAAGGAAGTGCTATTGGAAACGAGAAGCTCGGCGCTATCCAAACGACTTGAAGAGATGAGTCACCTAAACGGAGACCGAA…
490	752	1	218	218	+	LINE/Tad1	GGAAAAATGGTTAAAAATGGAAGGGGAAGGGTGGAGGACAAGGGGGAATGACCTGACGAGGTGGCCTCCGAGCACACAGGGCTCCTGGAACAGATGACGCGAGATGGATTGCGAACCAAATGAGACTTGGGGGACTACAACCCCACACATGAAGACTGCTCTGGGGCATATCCCAGTGGGGACCTGGGGTAACAGCCAGGCCCTCAAGTATGTATTTA
491	752	405	2295	1891	+	LINE/Tad1	CCCCACAAAACCTTGATGAATGGGTGACCTTGCTCCATGACATCATCCTCTCTGTGGCCACTACTTCCACCCCTCCACTCCTCCTATCTCCCAGATCCAAATGCTGGTGGACAGCTGAGGTAGTGCAAACTTGTAAGGCCATGACACTTGCTGGACATGGCAGAGATCCCACCTGCCTCACCATCATGCCAACTACAGGTCCCTCGGAAACATGCACTTCTGACAAATACCACATGCACAGGACTCACTCTGGAAGGAATACCTGTCGCAGGCAGAGGGCACAGATATATGGGCTGCATTCTGATGTACAAACCCATGCCACACCCAAATCATGCCACCCATTCACTCAATGGTAGGTAATGAGGTCTGCCTCTGTTTGGACTTCAAGGGAAAGGTGGG…
492	754	864	2743	1880	C	LINE/Tad1	CAGCATCACCGGGTTAGCTGGAATAACGAAGCAATGAGATGGTTGGGCGTTTAACTGAATCACTCGTTAACCTTTGCCGCGCACCGGCTCAAGGTGATATCGAAGGCTAAGTCAGACCAGGGATGTCTGCGCAGCTTAATAAACAAGTTTGGCATCCCCCTGGTGAGTGCTCGTAACGTACAGGTAGCGGTGGTTCAGTCAACTCTCCTTTACGGCGCAGAGCTTTGGTGCAATGGAAACCGTAGAATGACACGGGACTTTCAGTTAGTAATCAACAGACTCGCAAGAGGGATATCAGGATGCTTCCGTTCGAACCCTCTCCGCCCTCTACTCATGGAAGCCAACATGACACCGTCGATCCCTCTCTTAAACTATAGCCAAACCTGATACGCTCAACGC…
493	755	42	372	331	+	LINE/Tad1	GAAGAGGAAAAGCGACGAATGGTGGAGGCACGGAATGAGGGGAAGTGAGGAGTGGAGAGTGTACATATTTCTTTTGTTCTGTTTTTTCTTGCTTTTGGAAGAAATAAAGGCGGGTAAATGGCTAAAAATGGGAAGGGGAAGGGCGGAGGAAAGGGGGGAATGACCCGGCATGGTGGCCCCTGAGCAAACAGGGCTCTTGGACACGATGACACGAGATGGACTTGACACGGAAGGAGGGAGCATACAGGCCAATATGCCAAACATGATGACTGCTCTGGGGCGCTTCCCAGCAGGATCCTTGGGTAACAACCAGACCTGAACTTTGTATATA
494	758	69	2541	2473	+	LINE/Tad1	CCACACAGCAACCGCTGACCCCCCCTGCATTTTTTGACCACAACCTGAAATTTCCCGGCTCTGCAAATGGAAATCGCTTTATCGCACACTGTTTACACCGAATCCCAAATTCCAGGCCCGAATTGCTGTTTACCGTTTTGTTTCAGCGGAAAAATGTGATCCCGGGACCTCCGGACCGGTCAACGGGCCTTTCCATCAACGCCGCCCCACCTCCCGCCCTCCGGTCATCAAACAAACCTTATTTTCGGTTTTGGCATACCGAAATCCCCCCCTCCCCAAATTCCCCTATCGCCAGCAGCACGGGTTGTGGTGAACCCCAAAATTTCCCTCCTTTCGGACCCCCTGTTCTTCGCGAAAATATTTTCTCTCGCTTAACAAGAGCCTCATCATGTGATCCTC…
495	758	2607	2990	384	C	LINE/Tad1	AGAGGAAAAAGGGACCGATGAGGGGCAAGGCAGGGAGACGAGGAGCAGGGAGTGGTAAGTAAGAGTGGCCAGAAGCGCAATGAAAGGAGACAGAAGAGAGGAGGGGAGGGGCGCAGGTGGCCGGGAGGGGTTATCTGATTCTTGTTGTTTGGGAGCAAATAAAGGCAGAAAAATGGTTAAAAAAGGAAGGGGAAGGGTGGAGGAAATGGGGGAATGACCCGGCGAGGTGGCCTCTGAGCGCACAGGGCTACTGGAACAGATGACGCGAGATGGATTATGAACCAAACGAGACTTGGGGGACTACAACCCCTCACATGAAGACTGCTCTGGGGCACGTCCCAGTGGGGACCTGGGGTAACAGCCAGGCCCTCAAGTATGTATTTA
496	758	3305	5546	2242	C	LINE/Tad1	GAAGCGAATGCAGGGTGCCGCCTCATAATGTCATCACTATTTTTAGATGTTAGAGGTGCCTTCGACAATGTCTCCTCGACATGCCTGCTTGACACAATGCACACCCTCGGCTGCCCCAATGCTGTCCTCACCTGGTGCACATCTTTCCTAGATGAACGAACCACAGCACTATCCTTTGACGGGACAACAGATTGCAAGCACCCGATCAACACTGGTATCCCCCAAGGGTCCCCTGCCTCACTGATCCTTTTCCTTCTATACCTCCGCCCCCTCTTCGACGCCCTCAATGCAGCGCACCCGACCCTCTGGATGCCAAGCTACATCAACGACGTTGCCCTCGTAACCCATGGTCGAACACGCCAACAAAACGCCCGAGCCCTGGAGGCTGCAGCCCACACG…
497	758	5697	5942	246	+	LINE/Tad1	TTTGTTTATGCTTTTGGAGGAAATAAAGGTGGGCAAATGGCTAAAAATGGGAGGGGAAGGGAGGAGGAAATGGGGGAACGACCTGGCGAGGTGGCCTCCGAGCGAACAGGGCTCCTTGGACTCGACGACGCTTATGTACCAAACACTGAAGAGAGTTGGGGGATTACAACCCCACAACCAATGACGGCTCTTGGGGCCTATCCCAGTGGGGACCTGAGGTAACAGACAGGTTCTCATTCTTTGTAT
498	758	6012	7149	1138	C	LINE/Tad1	GCGGCTCCAGCGATAGCCAGGGAGGTGACGAACTGGGCCATTGACGATGACATCGCCACTGGCTCAGACCACAAGGTCATTCGCTTTGAATTAGACTCCCTCCACCCCGACCTCGACACCACATCCACCACCCCCTGCCTGAACTGGCATAAGACAGACTGGGCAGTCTTCACAGACACCCTACAACGGCTGTCCGACACCACCTACCCCCACTGGACCCATCTCAGAGCCAACCCCACTGCATGACACTTAGACAAATGGGCAATCCTTGTCCGGGATGCCATTCAATCTGCAGCCAAAGCCGCCACACCGGTGTCATTCCTCACGTCCCGCTCGAAGAGATGGTGGACAGCGGAACTGGACCAAACCCACAAAGCTATGACCAGCGCCCGCAGACGC…
499	763	3769	4127	359	+	LINE/Tad1	GGGCGAAGTGTAAGCCAGTGGCGAGGCTATTCAGGGAGGAGAAGGCAGAGAAGGCTATCCTGGAATTTCTGAGGAGAATGGGCGTAAGCAAAATGAATAGCACTGGCGGGCCGAGAGCGGAGAACTCAGGAGAGAGTGAAGCGGAGAGCGAGGGCTGGCCACCCTGGAAATATCAAGTGCTTTGTTTGTTTTTGTTTTGTTTTTGTTATGTTCACATCTATGGCGGAAGCGGGGAAGTAGGGAGCCACAGTTGATGCCCTAGTGGCAGTGGACAGGACACGGGTCGGTGGAGGACGGCGGTTTCATACTCAGAAATGAGTACATAGGTCGCATAATAATATCTGATTCAAAAAACAAAA
500	774	4591	10780	6190	+	LINE/Tad1	AAACGGCGCTAAAAAACCACCAACTTTTTCATGTAACCTTCCTGATTTGGAAAATTCACAGCCCTCTCACGGCTTCATTTTTGCCCCCCCTCAACAGCCCTGCAGACCACAGTGCCTGTAGGCACCGCCGAGTTGCTGTACCATGGTTACGCGAAGGGCTTGCAATTCAAACGTCCTCCTGCTGCTCGTACAGCAGCATGAACCCATCTAGCAATCCCCCCAGTGCTGCAGCTGCGGATGTCTTCTCCACCCCATGCATGCTGGCCATCCCAACACCCCTCCTCATGAAGCTGCTGCACTCACAGCACGGGCCGCTTGAGTTCAAGTCCCTGCAACCAACCCCAACCCACTTGCTTGCCGCAAGAGGTAAATGACCCGCGGATGTCTCAGCAGACACCT…
501	775	1146	1486	341	+	LINE/Tad1	ACCAGCCCGCCCCCTGCCCCCCGCTACAACCCCCTCATGTGCGTCTGCACAGCCCTGGACAGGAACACCCGCGTCGAAAACCCTCTTCGCCTCGGCGCCTGCACCCATGAAAACCCCTGCTCAACCCAAGAAAACCACCAAAAAACCCACCGCTCGCCCCCAAGAACTCCTGATTCCGAGCTCCGATCCCAAGACAATCACCGACCAGATCCGAGCGAAGGTAGGTATGGCAACGAATGCCACCCTCCGCAAACTCAATGCCCCAATCAACGTCGCAGTCATGTCGGTTCGTCAGAACATGACAGGCAACCTCCTCCTGACCCCGGCTCCCAACAGCTCTG
502	775	1930	3180	1251	+	LINE/Tad1	CCCCTCCCTATCCTCTCTGCCTTTCCTTGCCTTATCGAGAAGTGGCACAAACATGCTGTACACGGGGTGCCCATGGAACTATACCCGGACACCGAGGAAGGTATGCGGGCATAACAAGCTGATATCGAACCGCAGAACCATGCAGTGCAGCTCACCCAGCTCCCAAGGTATATGTTGCACCCTGACAAGAGAGCTGGGAAAGCTGCATCCAGCATCATGATAGCTGTCTGCACCCGCGATGAAGATGACAAGCTCAAGAGAAGCCGAGTTAACATTAACTATGCACCCCGCCGTGCCACGGACTATTACTCTTCATATCCTACAGACCAATGCCGACACTGCCAGAAGCTCGGGCACCACCAAGCTCCCTGCAAGGCAGATGACAGCCCCGTCTGCGGC…
503	775	3181	4340	1160	+	LINE/Tad1	CCTGGCATCGCCAGCGATGGCATGGGAACCAACAAATTGGGCGGTGGAAGATGCCCAAGCTACCGGCTCTGACCACGAGGTGATCCGCTTGGAGGTCACGACGACAATCCCACACCCCACCATAATCACCCTGTAACCCCATCTCAATTGGGTGCGAACGGACTGGGAAAGTTTCTCTGACACTCTCCGCTCGCTCTCGACATCCACATGATCACAATGGCAGTGACTGTGCCTTGACCCAACCCCGCCACACCTCGACAAATGGGCGGAGATGCTCCGGGACATCATAACGACCGCAGCCGCACATGCCACACCATTCCTCAACTCCTCCCCCCGCTCCAAATGCTGTTGGACCCCCAAAGTCTCAGCAGCCTGGCAAAACATGCAACAAGCTCGCTG…
504	775	4369	5235	867	+	LINE/Tad1	TATCACTCGACTACCCCCCCCCCCCTGCGTTCTCAACAACCACGTGGCAATCGCCAGATTTTCGAGCAGATTATTGTTCAGCGCCCCCAATTTACCTATCCGCAACATTTTCAGCCCAGGCCCTCTCTTTTTCATCGCGTTACACGGTGAAAAAGGGATCTCCGGGCCCCTGAAGAAGTCCAGCGGACAGGTCATCAACACCCCACCCCACAAACAACAAAAATCATCGATATTCCGGCGGAATCTTTGTCGTGTCCGCAAACACTACTTATCCCGAAATTCCGATGCCTCCCCGCTCCTCCGTTGCGGAGAAACAACCTCTCCCTCCCGACAAACCTCCCTCACGCATGCTCACGAACAAAAAACGCGCTAGCGCAGACCCGCACACTATGCAGGAAC…
505	777	624	1147	524	C	LINE/Tad1	CCCTCATGACCCCTGCCCCCAGGAAGACCCCTGCACCCAAGAAAACTCTGTCCCACTCCCAGGACATCATCATCCCCTGCCCTGACCCCCATGAACTGCTGGACAGCACAAAGACCCAAATTGGATGGGCAATGAATGCCACACTACATAAAGCAAACATTCCCACGATTATTGCTATCATGATGGTTTGTAAGAACATCTCCAGTAATCTCCTCCTAACCCCATCCCCTGATACCCCTGTCTCCAACCATCTTACCCATCTCCCCCTCATCCATGAAGCTGCCCATTCCTTGCACCCCTCCCTCCTAACCCACAGGATGAACGAAGACTGGCACAAACTTGCTGTCCCTGGGATACCCACCGAACACTTCTCTGACACAGCCAAAGGCATGGATTGCC…
506	779	375	2292	1918	C	LINE/Tad1	GGTGGATAGGCCTGTATTGAGATAGGAAGCTTAACTTTAGAAAACATGTAGTTAGACGAGCAACCACCACACAAAGAACTCTGAACGCACTGTGTAGGTTGCCACGGTACGAAACAGGACTGTCCCCTGCTGCTACAAGACTAATCTACCAGGCGTGCGTCCAGTCGAGAGCAGACTATGGCGCAGAGATATGGTGGAACCAACAAAAAGACCTTGCCCGCACCCTCGAGAAACAACAGCACACCGCCCTCCATAGGATCCTCAACACCTTTACCTCCACACCGGTCTTGGCGCACCACAATGAATCCGCACTCCCGCCCATCACAGTGCGCCTCGACAACCGCCAGCGGAAATACGCACTGCACACCCTCACTTTACCCGCTTCGCACCCGATTATCA…
507	779	2338	2782	445	+	LINE/Tad1	CCCTGCATTATCAACAACCACACAACATTCTCCCGGTTTTCCGGTGGAATTCGAATCAGCGACACCAATTTACCCCCCCTCGCCTGTTTCAGGCATGAATTCCCGTTCTCCGTTGAGTTTCAGTGCAGAAACAGGCTTCCGGAGCCCCCAGGCAGATCAGCGGCCATCTCCATCACCGCCGCCGACCCCCCCGCATGCCACTCATCAAATAAACACCAAAATACTTTTCGCCGGATCAAATACAACCCGCCCGCAGCCCCACACCCCCCCGCAGTGCCAGTTCTGGCGTTACACGTTCCCCTTTCTCCCTCAATTCCGCCCCTACGCGAAATCTCTTTCCTCGCTAACGCAGAGCCGCATTCATGTGACGTGATGGCCTCGCTAACGGACACCCCCGAC…
508	779	3558	3839	282	+	LINE/Tad1	CTCCCCAAACCTTGGACCGGCCCACCAGCTTCAAAGGCTCTCTTCAAACCCGCCCCCCAACCGAAGAAACAGGCCCCCGAGAACCCCCCGAGAGAAGCCCACTCACGACCCCAGGAACTCGTTATCCCATGCTCTGACCCGAGCGCCCTCCCTGACGCTGCGAAGGCAGTGATCGAAAATGCCATTAATGAAGCCCTCCGCTCGGCAAATGCCCCTGACCACATCGGGATCCTCACAGTCCACAAGAACATAGCCGGTAACATCCTACTAACTCCCTGCCCC
509	781	131	1164	1034	+	LINE/Tad1	GCCGCCCCGTCACATGGTATGCCTTCTCCGCCATGTTAGCCCATGGATACACCCCAACGACACACTTGAAGACACAGCCCAACCGGTAACAACACCATGGATGATGAGCCCCGTAACCATAGACATACCCGACCTATCTAAGGACGATGGCACACCCACTCACCTCCACCTCGTACACCGCCTCCGGCAGGACTGTCAAAACGTCATCATATACACCGATGGCTCCCAACTCTCCACCAACACCGGAGCTGGCTACTACATCCCGCACGGCCTACCCGAACCCCTCCATGCAATTGTCCCCATGGGGACCACCACCGAAGTCTACGATGCAGAGCTGAGAGCTATCTACGAAGCTCTGTTGTCCACTCGCACCAATATCATCTGCCATAACCTCCTCCG…
510	784	1	893	893	C	LINE/Tad1	CACTACCCAGCAACTGCTGACCCCCCCTGCATTTTTTAACAACAACCTCAAATTTCCCAGCTCTGCCGATGGAAATCGCTTTATCGCACTCTGTTTACCCTGAATCCCAAATGCCAGGCCTGAATTCCTATTTACCATTGTTTTTCAGCAGAAAAACACGATTCCGGGACCTCCGGACTGGTCAACAGGCCTTTTCATCAACACCGCCCCACCTCCTGCCCTCCGGTCATCAAACAAACCTTATTTTCAGTTTCGGCATACTGAAATACCCCCCTCCCCAAATTCCCCTATCACCAGCAGCACTGGTTGTGGTAAACCCCAAAATTTCCCTCCTTTCGGATGCTCCTTTCTTCGTGAAAATATTTTTCCTCGCTTAACAAGAGCCTCATAACGTGATCC…
511	784	1879	2783	905	+	LINE/Tad1	TTACAGCTCCATCACAGCTTATCATCCCATAGCACTCCTGAAGTGAATGGGTAAAGTACTTGAAAAATCAATGGCAACGCGACTTAGCCAAATGGCAGAGTCACACGACCTCCTGCACGATGACCAAATCGGAGGCTGCCCCAAGCACTCGGCAATCGATCACATGATGGTGCTTAAGCACGATGTGGAAGTGAATGCCCAGCAACACCTAATAATGTCATCGCTGTTCTTGGATGTCCGAGGCGCCCTCGATAATGTTTCCTCAGAATGCCTGCTCGACACAATGCATGCCCTTGGGTGACCTACTGCAGTAACATTGTGCTGTACATCCTTCCTTAACGAATGAACCACAGATCTATTCTTTGACAGGAGAACAGACACCCAATGCCCAATAGAAAC…
512	784	6528	6900	373	+	LINE/Tad1	GGCAGGTAGGGATGCGAAGGGAGGTGAGGAGTTGAGGAGAACGGTTGGAGTAGAGTCACGGGGTAGGGGAGAGAGGGGCGAAGACAGAGGTGGAGACGGCCGGGAGGTGTTACCTTGTTCTTTTGTTATGTTATTGCGTTTGAAGGAAATATAGGCGGAAAAATGGCATAAAAAATGGGTGGGGAAGGGTGGAGGAAAGAGGGGAACGACCCGGCGAGGTGGCCCCCGAGCGAACAGCGCTCATTGGACTTGATGACGCTTATGTACCAAAAACCGACGAGAGTTGGGGGACTACAACCCCACAAACCAACACTGGCTCTGGGGGCCTATCCCAGGGGGAGTCTGAGGTAACAGACAGACTCTCATACTTTGT
513	788	1	855	855	C	LINE/Tad1	CACATAGCAACTGCTGACCCCCCCTGCATTTTTTAACAACAACCGCAAATTTCCCTGCTCTGCCGACGGAAATCGCTTTATCGCACACTGTTTACCCCGAATCCCGAATTTCAGGCCCGAATTCCTGTTTACCATTGAGTTTCAGCGGAAAAACGCGATTCCAGGACCTCCGGATCGGTCAACGGGCCTTTCCATCAACGCCGCCTCACCTCCTGCCCTCCGGTCATCAAACAAACCTTATTTTCAGTTTCGGCATACCGAAATCCCCCCCTCCCCAAATTCCCCTATCGCCAGCAGCACTGGTTGTGGTGAACCCCAAAATTTCCCTCCTTTCGGACCCCCCTTTCTTCGCGAAAATTTTCTTTTCTCGCTTAACAAGAGCCGCATCACGTGATCCTT…
514	788	957	1357	401	C	LINE/Tad1	AAGAGACACAGGGGACGAGGGGAAGAAGGAGAGGGAGTCATGGAGGTGAGGGACGAAGGGAGAAGTGCCGGAGTAGAAGGAGTAGCGGAGAAGTGAGAGAGGAGAGGCGGGGGGGGCGGTGGCCCGGCGGAGTTATCTTTTTCTTTTCCTTTCTGTTATGTCTTGGTTTGTGGTGGAAATAAAGGCGGGAAAATGGCTAAAAATGGGCGGGGAAGGGTGGAGGATAGGGGGGAACAACCGGGCGTGGTGGCCCCTGAGCGCACAGGGCTCCTGGAACTGACGACGCGAGATGGATTAAGACCCAACAAGAGGGGAGACTACACTCCCAAACCCTCATAACAGCTCTGGGGCTTACCCAGTGGGGAACTGGCATCATGCCCAGGTCCTTAACATTGTATT…
515	788	1501	3086	1586	C	LINE/Tad1	CACCCGATTATCACACACTGCCCTGTCTCGTTCCTCGCGCCAGGTGTCGAAGATGCCTCCATCAACTCAGACACTGAGTACGACCACCCATGGCACACCCCAGGAAACGCCCTGTCCCGCCTCCTCCACGTCATAAACACACTCTCCCCGTGAGTCCGACCCAATGCCGACATCGAGGACACCTCCCAGAACATACCCGACGATGCCCTCGCCCCCACACTGACAGTTGACATCTCCCCCGCTCGAAAGGACAAAGCTGGCGGTGACCACCTCCTCCTACTCCACACCCTTCGCCAACAGCCGAACACCATTCTACTATACACGGATGGCTCCCAACTTGATGACATGACAGGCGCTGGTTACACCATCCCCCATGGACTGCCACAACCTATTAACGCA…
516	797	2236	2619	384	+	LINE/Tad1	AGAAGAAAAGGAGGCTGGTGAGAGGGAAGGAGGGGAGATGAAGAGCAGGGAGTGGCAAGTGAGAGAGGCCAGGAGGGCACAGAGAGGGGAGAGAGGGGAGGAGGGGAGGGGCACAGGTGGCCTGAAGGGATTCTCTGATTTCTTTTGTTTGGGAGGAAATAAAGGTGGAAAAATGGTTAAAAATGGAAGGGGAAGGGTGGAGGAATTGGGGGAATGACCCGGCAAGGTGGCCTCCAAGTGAACAGGGCTCCTGGAACAGATGATGCAAGATGGATTATCATCCAAATGAGACTTGGGGGACTACAACCCCACACATGATGACTGCTCTGGGGCATATCCCAGTGGGGACCTGGGGTAACAGCCAGGCCCTCAAGTATGTATTTA
517	799	12966	13481	516	+	LINE/Tad1	TCACCCGAGCCTTACTCATGGATGTCAAAGGAGTGTTCGATCACGTTTCAAAAACACAATCAACAAAAAGAATGGAAGAGCTGGAGACAGACCCACAGATAATTCAATGGACAAATAGTTTTATGTCAGATCTGAAAGTGTATTTGGTAATCAATGGACACGAATGCACCATGAAAGAGACAACAACCAGCATACCTCAAGGATCACCGGTATCTCCCATCCACTTCATGATCTACATATCTGGAATCTTCGAAGAGATAGAAAAGGAAGTCCTCAGATCCACTGGACTGTCATTCATGGATAACATATCATGGCAGGCTGTGGACAAAGACATAACAGAGATAATGAAAATCCTGACACAATGTGCAAAAGCCATGGAAGCTTGGACAAATGGAAATG…
518	799	194594	195066	473	+	LINE/Tad1	TAAAAAAGAAGGAGTCTGACATCTGCTGGTGGTGTGACTCGGGAAGAAAACAGACTCACGGACATCTGTTCGGGAGGTGCAGGGCTTGGAGGAGAGAGCTGCTGGATTTGAAGAAAAAGGTCGAATGGCTCAAGGGGAGGCGAAGGGGGAGAGGGGCAAGACTGAAGGTAGTTTCCTTATTTCAGGACGAGCGGTTGACGGATGCTGTCCTAGAATTCCTGGAACAAACAGAGATAGGCAGACGATATGAGTAGGACACCATAAAGGTACCACTCTCTTCTTTCTTTATGAGATGCTACGGCTTTCTTTCTTCTTTTCTTTCATTTTTCTCTTTCCTTTGTACGGCGGTTTTTATGGGATTAGGAGATTAGGGGGCCTCACTAGGTGGCTCAGACCACG…
519	799	227938	228629	692	+	LINE/Tad1	GCAGTCATCGGAGTACACCTCAAACGGATAAAAACAATCCAAGACGACAGATGCTGGTGGTGAAACTCGGGCGACAGACAGAGTGTCAAACACCTGGTCAAGGAATGTAGGAAATGGCGAAAGGAACGGGAGAAAATGCAGAAAGGCATAAAAAAGCACTTATGGATCAACGAAGACATAAAGTTCATGTTTGCGGACAGAAAAGCAACCCCCGCTATAATCCAATTCCTTACCAAGACGGAAGTAAGGAATAGAACAAGTGAGAAGACCATGGAGAGAGCAGCGGAGAAAAGAGATGAGAATTTGGGATGGGAAGATTTGACGAGAACGGAGGAGGAGGAAGAAGAAGAAAAGAGGAGAAGAGAAACGGAAGATAGATTGCAAGAGGTCGATGCTATT…
520	800	775	1263	489	+	LINE/Tad1	CACTACACAGCAACCGCTGACCCCCCTGCATTTTTTAACAACAACCTCAAATTTCTCAGCGCTGCCGACGGAAATCGCCTTAGCACCCACTGTTTACCCTGAATCCCGAATTCCAGGTCCAAATTCCTGTTTACCGTTGAGTTTCAGCGGAAAAACGCGATTCCGGGACCTCCAGACCGGTGAACAGGCCTTTCCATCAATGCCGCCCCACATCCTGCCCTGCGGTCATCAAACAAACCTTATTTTCGGTTTCGGCATACCGAAATCCCCCCCTCCCAAAATTCCCCTATCGCCAGCAGCACCGGTTGTGGTGAACCCCAAAATTTCCCTCCTTTCGGACCCCCCTTTCTTTGCGAAAATTTTTTCTCGCTTAACAAGAGCCTCATTACGTGATCCTTC…
521	802	3	1288	1286	C	LINE/Tad1	CTGCGATCACCACAACCACATGGAAATCCACAGATCTTTGTGCGGCAGCGTTATCAGCGACCTCGCTTTACCTAGCTGAAGCATCTTCAGACCAGGCCCGCTCTTTTTCATCGTGTGAACGGTGAAAAAGAGATTTCAGACCCCTGAAGCAGCCCCTGGCTACAGACTTCATCACCACCCCTCAACAACAACCACCTCAATCATCGAACTCATTTCATTTCATCCCTTCATCGATCAAAGTAAACCTATCCCGAAAAGCCGATGGCCCCATGCACCTCTGCTGCGAAGAAAAAACCAATCCCTCTGGACAAACCCTCCCTCCCGGCGCTCGCGTCCAACAGACACGCTAATGCAGAGCCGCATACTCAATGCGACGTGCAAGAAACAATGCACCTCGAC…
522	802	11627	13360	1734	C	LINE/Tad1	CACCCAATCTCACTCCTCCCTGCCTATCAAAGATATATGAACAAATATCAGCAAACTGCCTAGCCATAACAGCCACCAGATGCCTCGCAATTTCTAAACACCAACTGGGAGCCAGAAGCCACTATTCTGTCATTGATGCACTCCTGACTATCCTCACCCCTATCAGCTCTGACCTAGCCATACCAACAACTGGCAAGCTCACCCACCCACACACCCAGCCTGCTAGTACATGACATTGAAGGTGCCTTCAACAACACCAACCCATCACTACTCCTCCAAGTAATGCAACAATGGAACATGCCCCCATACCTGATAGCATGGACCAGAGCATTCACAACCAACCACAAGCTAGCATTCTCCTTCAATCAACAACTTGAGACACCCAAACCCTTCTGATGC…
523	802	25578	27819	2242	C	LINE/Tad1	CACTGTTGCCACCCAGGCCCTAGAAGCCATCAACAAAGTCATCAAAGAATCACCTGATATCACATCACCCCCCTTCATCCTGGCCCACATCACTAGCAACAACAGACTAGTGCTTACCACCAACCCCACCACCAAGGCCAGAAATATACACTGTAACTGCAAATCATGACCAACATCACCAACAACCTCAACCCCTCTGAGTCCACAATCAATGAATGCTGGACTAAATTCCTCCTGCACAATGTCCCCACCAATGCCAACCTCCCTGCCATCAGAAATGAACTCAAATCCACCTACCCCTCCCTCCACATCAGACTAGACCCCTGCTGGCTTGTACCTAGTGAATGCTGAGCTACTAAATCAGCATCCACAATTGTCATCTCTGTTATTGGCAACATT…
524	808	119117	119432	316	+	LINE/Tad1	GATTAATATAGGGGGAAATTTAAAGGTCAAGTATAACAAAGGGACAACCAGATAGCTAGGATTCTGGCTGGACTGCGGACTAAACTTCAAAGAACACTTCACCAAACGAATGGCAAAAGCTCGCCAAATGGAGAAGAGCATCACACGACTCTATGGAAGCTACAGAATGACACCAGCAAACGTCAGAAAGATCACAACGGCGGTTGTACAATCCTCCGCCCTGTTTGGGTCCGATATCTGGTGGAGAGGACAAGCAAACCGAGCGGAAGAGGTACAGAAAATGATTAATCAACAAGCCAGAGCCATCACGGGATGC
525	809	61	1895	1835	+	LINE/Tad1	GTTCACCTTCCCTGAATTGCCTATTCGCAGCATTTCCAGACCAGGCTTTCTCTTTTTTGTTGAGTTTTCAACGAAAAAGTGTTTTCGGGCCGCTGAGAAAAGCCCCGCGAACCTGGTTCCATCAATACCGCACCCCACACACATCAAAAATCATCATTGTAATCGCGGATTCCTCGTCGCTACCGCAAAAATACCTTATTCCGAAACTCCAATGCCTCCCTCATCCTCCGCTGTTGAGAAACAGCCCCTGCCCCCTGACAAAGAACCCCCTCGAGCACTCGCGATGAAGAAACGCGCTAACGCGGAGCCGCAAAGGCCTGATGCGTCCAACGCGGAAATGCACATAGACACGTGCTCTGACATCAGCGAGGACTTTAGCGATGATGACACATCTTCCCA…
526	809	1963	2320	358	C	LINE/Tad1	AGGCGGGGAGACGAGGAGCAGGGAGTGGCAAGTAAGAGTGGCCAGAAGGGCACTGAAAGGGGAGAGAAGAGAGGAGGGTAGGGGCGCAGGTGGCCGGGAGGGGTTATCTGATTCTTGTTGTTTGGGAGGAAATAAAGGCAGAAAAATGGTTAGAAAAAGGAACGGGAAGGGTGGAGGAAATGGGGGAACGACCAGGCGAGTTGGCCTCCGAGTGCACAGGGCTGCTGGAACAGATGACGTGAGATGGATTATGAACCAAACGAGACTTGGGGGACTACAACCCCACACATGAAGACTGCTCTGGGGCATGTCCCAGTGGGGACCTGGGGTAACAGCCAGGCCCTCAAGTATGTATTTA
527	809	2325	2806	482	+	LINE/Tad1	CTGCGCCATCTGCGCCCTTACTCACCCGACCAAATACGACCCATGCGCAGCCTGCCCCTCACTCAAAGTTCGCAAATGCATCCACATGGTATACAAGTGCATCAACTGCACCAACACTGGCCTTCCCGACACCCAACATGCCACCTACAGCACCCATTGCCCCATCAAGGTGAACGCTGTACAAGAGGCATGGCAGAGGACCTGCCCCGACAATACCCAGAGCGCCATCCCCGCGGAAACCAACCCCATCGCAGATACTACCATGACTGCTGATGAATAAATACAACTCATCAGCCACGACCCTCCGGATCATATCTCACAACCTGAACCACAGCACCACCACCCTCACAACGTTGTTGAACACAGCAAACATAAACACAGACATCATTCTCATCCAAG…
528	809	2814	4002	1189	+	LINE/Tad1	TTAGCCCATGGATACACCCCAACGACACACTCGAAGACACAGCCCAACCGGTAACAACACCATGGAAGACGAGCCCCATAACCATAGACATACCCGACCTATCTAACGACGATGCCACACCTGCTCACCTCCACCTCGTACACCGCCTCCGGCAGGACCATCAAAAAGTCATCATATGCACCAACGGCTCCCAACTCTCCACCAACACCGGAGCCGGCTACTACATCCCGCATGGCCTACCCCAACCCCTCCATGCAATTGTCCCCATGGGAACCACCACCGAAGTCTACGATGCAGAGCTGACAGCTATCTACGAAGCTCTGTTGTCCACTCGCACCAATATCATCTGCCATAACCTCCTCCGGCACAACATCCACATATTCACAGACAATCAGTCTG…
529	824	5321	5680	360	+	LINE/Tad1	AGTGGAAACAAGAGGCAAGGGAGAGAGAGAGGAGCGCGGAGAGAAGTGGAGAGTCAGAAGGGGAGAAGCAGAATGGAGATGAGGCAAATGAGGAAGGGTGGAGACAGGAATGGGTGGTCTATTTCTTTTGTTATCTGATTGTAATTTTTTTCATCATTGTTAGATCTGAGGAGGAAATACAGGCGGGAAAAAGAAAAAAAAATGGGAGGGGAAGGGTGGAGGAAATGGGGGATGACCCGGCGCGGTGGCCCCCGAGCAAGCAGGGCTCCTGGACCAAACAACGACAGCAGAACAAAGAACCGAGGAGTAAGAAGGGGACTACAACCCTAACAAGAAAGACTGCTCTGGGGCATATCCCGG
530	824	12816	14361	1546	C	LINE/Tad1	TCAGCCCATGGGTGCCCCTCGACGCCGACATTGAGGATACAGCACAACCTATAACCACCCTGTGGAACACGCCTCCCATCATCATCGACATACAGGACCTGCCTAAAGATGAAGCAGTGACCGCACACCTTTCTCTCCTCCAAAACCTCCGCGATGACCCCCACAACATCATAGCCTATACCGACGGTTCACAACTGTCCACCCAGACCGGCGCGCGATTCTACGTCCCCCATGGCCTCACCGACCCTGTCCGCGCCGTCATCCCCCTAGGAAGCATCTCTGAAGTCTTCGATGCGGAACTCAGGGCCATCGCGGAATGCCTCCGCACCTGCCTTAAGTACATCAAACGACATCACCTACATGACTGTTCAATCCACCTCTTTACCGACAACCAATCTG…
531	824	14989	15256	268	C	LINE/Tad1	CAACAAAACGCCGCCATTCGCCGCATCTTAAACGCCTTTCACTCTACCCCAATCGTAGCCCTCCATAACGAGGTCGCCCTCCCTCCTGTCTCCGTTCGTCTACAAAGCAAGCAAACAAAATACGTTCTCCGTCTCCTTACTCTACCCCAATCACACCCCGTCATCAAACGCTGCCCCTCATCATTCCCCGTGGCAAACCACCTCTCGACAGCGCTGTGCGACCCCGACGAATACGACTTCGACTGGACCCAGGAACGCCGCCCCACCT
532	826	9	750	742	C	LINE/Tad1	CCCCCCCTGCATCTCAACAACGACCTGGAAATCGCCAGATTTTCCTGTGGATTATTGTTCGGCAGCCTGAATTTACCTTTCCGCAGTGTTTTCAGACCAGGCCCTCTCTTTTTCGTCGAGTTACATGGTGAAAAAGAGATCTCCGGGCCCCTGAAGAAGCCCCGCGCATTGGTCATCAACACCACACCCCACCAAAATCAAAAATCATCAATTTTCCAGCGGAATCCCCGTCGCGACCGCAAAAACTACTTATCCCGAAATCCCGATGCCTCCCAGTGCCTCCGTTGTTGAGAAACCCCCTCTCCCTCCTGACAAAGAACCTCTCCGGGCGCTCGTGAAAGGAAAATGCGCTAACGCAGAGCCGCACGAAGCGCGCGACACATCAGACACCGAGATGCA…
533	826	775	1659	885	C	LINE/Tad1	CCCCCCCCCCCCTGCATTGTCAACAACCACATGGCAACTGCGAGATTTTCGAGTGGATTATTGTTCAGCACCCCCAATTTACCTTTCTGAAACATTTTCAGTCCAGGCCATCTCTTTTCCAATGTGTTACACGGTGAAAAGGAGATCTCTGGGCCCCTGAAAAAGTCAAGCAGAATGGTCATCAAAACCCCCCCCCACAACCACCAAAAATCATAGATTTTCCGGCAGAATCGTTGTTGCACCCACAAACACTACCTATCACGACATTCCGATGCCTCCCCGCTCCTCCATTGTGGAGAAACACCCTCTTCCTGCTGACAAACTGCCCACATGCGACCTCACTACCAGCAAACATGCTAGCGCAGAGCCGCACGACATGCAGGCATGTGACGCGAATGG…
534	826	1687	2546	860	C	LINE/Tad1	CCCCCCTGCATTCTCAACAACCATGCTGAAATCAACAGATTTTCGAGTGAAATCATGTTCAGGATGCTCAATTTGCCTTACTGCATTGATTTCAGATCAGGCTCCCTCTTTTTCAGCATGTTACATGGTGAGAAAGGGATTCCTGGGCCCCTGAAAGAGACCTGCAGTGCGGCCATCAACACCCCACCCCACAACCACCAAAAACCATCCTTTTTCTGGTGGAATCTTCGTCGTGCCCGCAAAAACAGACTATCCCGAAACCCCCATGTCTCCCTGCCCTCCCATGGTGGAGGAAACCCCCCCCTCCAGAGCAAAACCTCCCCCTTGCGACGCTGCAACAGAAAAACATGCTAGCGCAGAGCCGCAGCCCCTGAAGAAACACGATGTGCATGCCGACGT…
535	826	2575	2974	400	C	LINE/Tad1	CAAGCAATGGCACAAACTCACCATACACAGCATTCCCAGTGATCATTTTCCCAACAACCATGAAGGCATGACACGCCTACCATCAGAGATCGAAACAAATCACAAGGTAAGCCTAGCACAGCCCCCGCACTACATGTCCCACCCAGACAATAGGGCAGGCAAAGCTGTGTCTAGTGTCATCATCACATTGCGATCCATCAAAGAATACAATGCCCTTTGCTGCACCAAGGTAATCATCCTCTACGAACCTAGGAAAGTCACGGAATTCTTCACCACTCGATCGACCGACCAGTGCCACTCATGCCAGCACTTCGGACACCATCATGCCACCTGCTCAGATGAAAGGGGCCCAACCTGCACCTTATGTGCAGGAAAACACCCAACCGAGGCCCACAGCTGC
536	826	3040	3381	342	C	LINE/Tad1	GAAGCAGGATGGGAGGGAGATGAAGGGTGGAGAACTGAGAGGGACGAAGGAATGGGGAGAGAGGAGAAGGGATGAACTGGGTGCAGAGATTATCTTTTTCTTTTGTTCAGCAGGGAAAATATAGGTGGAAAAATATGTAAAACAGGGCAGGGGAAGGGTGGAGGATGGAGGGGAACCCGGCATGGTGGCCCCAGAGCAAACAGGGCTCATGGCCAAGACGATGCGAGATGCACTAAAACAGAGAGAAAAAGGAGGAGGCTACACTGCCAACGATGATGACTGCTCTGGGGCTTATCCTAGCAGGCTCCTGGGGTAACAGCCAGGCCTTAACTTATGTGTATA
537	828	10748	12166	1419	C	LINE/Tad1	ACCTAGATGAATGGGCTGCACTGCTGAGGGATACTATCAGAAATGCTGCAGTATCATCAACACCATACCTGGAACTATTGCCCTGCTCCAAGAAATGGTGGACAGTGGAACTGTCAGATGCATGCACCAACATGAATTGCACCAGACACCAATGGGAGTGTACCCATGCCAACATCCACTATACAGAATACTGTGGACTATACAACAGGTAGTATAGGAAGGTAAGACATGCAAAGGACATGATGTGGAAAGAGTACCTTTCCAAAGCAGAAGGCCTGGACATCTGGTCAGCCATATGGTATACCAACCCCTGAAAGGTACAGATGACTCCTGAACTCGGTGTGAAGCACAACAGAGTGGAAAGGGTATGCACAGACTTTGACTCAAAGGTTCAAGCTT…
538	832	85	3013	2929	C	LINE/Tad1	CCATCAAGAATAGGGCCAACTCCGCAACAAGTATTTCCAGACCATTCGCCACACCAAAGATGCGAAATGGAAAGAATACCTCGCTCAGGCAGAAGGCCCGGACGTGTGGGCAGCTTTCCGTTATACAAACCCCTGGAAGGCTCAGCTCACCCCCGAACTGCAGGTTGAGTTGAACAGTAGCCCCCGCATCTGCGCAGACTTCGACTCCAAGGTAACAGTATTCCAAGTCCTCTTCCCTATGCCCCCCAAAGATCACCCCAACCCTACTGCCCCAGCCAGGCCAGAGCTACCATGGCAGACCTTCTCGCCAGCCGAAATCAAATCAGCCATCTATACCTCCTCACCGTAGAAAGCCCCCGGACCGGATTCTCTCACCTTCACCTGTCTGCATTGAGCATA…
539	832	3288	3491	204	+	LINE/Tad1	ACCACACAGCAACCGCTGACCCCCCCTGCATTTTTCAACAACAACCTCAAATTTCCTGGCGTTGCCGACGGCAATCGCCTTAGCGCACACTGTTTACCCTGAATCCCGAATTCCAGGCCCGAATTCCTGTTTACCATTGAGTTTCAGTGGAAAAATGCGATTCAGGGACCTCCGGACCGGTGAACGGGCCTTTCCATCAACGCC
540	837	181	947	767	+	LINE/Tad1	CCCCCCCTGCATCTCAACAACCACCTGGAAATCGCCAGATTTTCGAGCGGATTATTGTTCGGCAGCCTGAATTTACCTTTCCGCAGTGTTTTCAGACCAGGCCCTCTCTTTTTCGTCAAGTTACACGGTGAAAAAGAGATCTCCGGGCCCCTGAAGAAGCCCCGCGCATTGGTCATCAACACCACACCCCACCACAATCAAAAACCATCAATTTTCCAGCGGAATCCCCGTCGCGACCACAAAAACTACTTATCCCAAAATCCCGATGCCTTCCGGTGCCTCCGTTGTGGAGAAACCCCCTCTCCCTCCTGACAAGGAACCTCTCCGGGCGCTCACGAAAGGAAAACGCGCTAATGCAGAGCCGCACGAAGCGCGCGACGTGTCAGACGCTGAGATGCA…
541	838	25	3366	3342	+	LINE/Tad1	CCCCAATCGAAACGATTGTGGACCCCAGAAGTCACCACGGCAAGCATAACAATGACCAAAGCGAGACGTAAGTGGAAATATAACCATGACGAGAGATCTCACATAACACACAAACATCACCGAAATGAGTACCACAGGACCATCCACACAGTGAAAGATACTAAGTGGAAGGAGTATCTTTCTCAAGCCGAGGGGCACGATTTATGGCAGGCGTTTAGGTACACAAACCCTTGACATGCTCAGCTAACACCAAACCTTCGCGCGATGACCAATGGCCAAGAAACAACATGTAGCTCCTTCGAAGCAAAAGTGGAAGCATTTCAAAAGCTGTTCCCCCCACCGCCACCACCACCGCCTCCATCCATCCTTCCCCCTTGCTGCGAGTTGAAGTGGACAACC…
542	838	3502	3722	221	+	LINE/Tad1	ATCCCCCACATGCTCAACCCCCTTACCCTCCTGCGTCGATGCATCATCACAGGGGATCTCAACTCCCATCATCCTCTGTGGAACTCGCACATGCACAGATCAACATGGGCTGCCGAGCTCGTCGAACTGTTGGAATCACATGACTGGCGGCTGGTGAACATCCCAGATGTCCCAACCCACCAATACAAGGACGGCACAGGCTCATCAGTTCTGGACATCAC
543	838	3723	5795	2073	+	LINE/Tad1	CCTGGCTTCCCCATTGATGGCAAGGGAAATAACAAACTGGGCCATCGATGACAGAATATCACAGGTTCAGACCATGAGGTCATCCGGTTTCAACTAAACTCTCTACATCCAGACCACACGGCAGCCCCCCTTGCAAGTACTCATCTAAACTGGAACAAAACGGACTGGGATACGTTTACCAAGGAGCTCCAGCTCCTCGCGGAGGCCAGCCACCCGTACTGGACACACCTCTGTGCCAACCCCTCCACAAGCAACCTCGACGAGTGGGCCGCCCTACTCCGTCACTCCTTACAGAGTGCAGCATCCAAGGCCACCCCAACCCTATTACCCACCCTGAGCTCGAAACGGTGGTGGACTAATGAAATCCGCCACACCTGCCATTAAATGCCCACCGCCAGA…
544	838	5811	6579	769	+	LINE/Tad1	CACTGGCGCAGGATACAGCATTACAGACGGCTTACCCCAATGACTCGATGAAATCATCCCCATGGGTGACACGACGGAAGTCTGTGATGCAGAGCTGCGCGCCATCCATGACTGCCTCACGAGCTGCCTAAAAATTCTCCGACTCAACAACCTCCACCGTGACCAAATTCACATCTTCATGGATAACCAGGCAGCAATCCTCTGTGCTTCCCGGACAACATATGGCCTGGGACAGGAACTCGCTCTCTCTATACATGAAATAGCCTCCTCCCTCTGCCGACAACAAGCAACTGTCACCCTCCATTGGGTCCTGGGACACACCAACATACCCGGCAATGACTCCGCAGACCTCGTCGCAAAGAGAGCCACCTCCCTAACCCCCACCGTGCCGCCCCCAGT…
545	839	1943	2304	362	C	LINE/Tad1	AAAGGAAAAGGGGACCGGAGAGCGACAAGGAGGGGAGACAGAGGGCAGGGAGTGGCAGGTGAGACTAGCCAGGAGGGCATGGAGAAGGGTAGAGAGGGGAGGAGGGAAGGGGTGCAGGTGGCCTGAAGGTATTATCTGATTTCTTTGTTTGGGAGGAAATAAACGTGGAAAAATGATTAAAAAAGGAAGGGTTAGGTGACAGAAATGGCAGAACAACCTGGCGAGGTGGCCTCCAAGTGCACAGGGCTCCTGGAACAGATGATGCAAGCTGGATTGTGAACCAAATGAGACTTGGGGGACTACAACCCCACACATGAAGACTGCTCTGCAGCATATCCCAGTGGGGACCTGGTGTCACACCC
546	841	224	472	249	+	LINE/Tad1	GACATACAATGCCACCCACTGATGATGCCTGGACACTGCCTACACCTCCCTGCTGCACTGACAATCTACCATGATTCTCGGCCTCAGAACCAGAAACAGATATTTCTTGGACTGCCTTGCCCACTCCCCCTCTGACAACTACCCTTCCCGCTCTTGCACATGCCCAATGCACCCCCCCCAAACCCCAAAATATCTCCTCCTTTGCTGCCCCATTTACAATGTAGCATGAACCGAACTAAACAACATTCT
547	841	2569	5741	3173	+	LINE/Tad1	AGCCATGCCTCAATTGGCGAAAAACCGATTGGGCCACCTTCACCATGACCCTCCAACACCTCTCCAACGCCGCCTGCCCCCGCTGGACCCACCACCACCAACACCCCTCCCCAGCGAACCTTGACGAATGGGCAAATCTGCTGCACAAAGTCATAAAAACCGCCGCCGAGAAATCCACCCCCCTGTTGACCCCCACCCCTCGCTCGAAAAGATGGTGGACCATGGAGCTCGAACAAACTCAGAGGGATATGTCCCGTGCCCGGAGACGATGGAAAAGTTCGCGCCTCCCCGCCCATCATGCTGAGTTCAAGCAACTCCGGAACGCTCATTACCGCCATGTACGACACGCGAAGGACTCGCTGTGGAAGGAGTACCTTTCCCAGGTGGAAGGCGCCGACG…
548	844	6	1771	1766	C	LINE/Tad1	CACAGAGCAACCGCTGACCCCCCCTGCATTTTTTAACAACAACCTCAAATTTCCCCGCTCTGCTGACGGAAATCGCCTTATCGCACACTGTTTACCCCGAATCCCGAATTCCAGGCCCGCATTCCTGTTAACAGTTGAGTTTCACCGGAAAAACGCGATTCCGGCACCTCCGGACTGGTCAACCGGCCTTTCCATCAACGCCGCCCCACCTCCCGCCCTCCGGTCATCAAACAAACCTTATTCTCGGTTTCGGCATACCGAAATCCCCCCCTCCCCAAATTCCCCTATCGCCAGCAGCACTGGTTGTGGTGAACCCCAAAATTTCCCTCCTTTCGGACCCCCCTTTCTTCGCGAAAATTTTCTCTTCTCGCTTCACAAGAGCCACATCACGTGATCCTT…
549	845	136349	136627	279	+	LINE/Tad1	ATGAGAGAAAGGAGGTTGCCTCCCGGTATTACCAGCCACGCAGTTATTTCACAGTATCTGAAGGAGAAGCTTGCAACGTTAGACTCGGACACCTGCTGGTGCTTCGAGCCAGGGAAGAGGCAGTCCCGCGAGCATCTCTTTAAATAATGTTCACGTTGGGCTCCTGAGATTAGAGACCTTTAGCGAAGAGTTTGTAGGGAGTTAGGTTCGACGCGGGCACGGTGGAAACCTATCTCGCGGCTATTCCGAGAAGAAAAGGCGACGGAATTCTGAAATGCG
550	853	3	2169	2167	C	LINE/Tad1	CCCCCCGCATTTTCAACAACCACGCTGAAATCGGAAGATTTTATTGCGGATTACTGTTCGGCAGCCCCGAATTACCTATTCGCAGCATTTCCAGACCAGGCTTACTGTTTTTCGTTGAGTTTTCATCGAAAAAGAGTTTTTGGGCCCCTGAGAAAAGCACCGCGAACACGGTTCCATCAACACCGCACCCCACACACATCAAAAATCATCATTTTAATCACGGATTCCTTGTCGCTACCGCAAAAATACCTTATCCCGAAACTCCGATGCCTCCCCGATCCTCCGCTGTTGAGAAACAGCCCCTCCCCCCCGACAAAGCACCCCCTCGGGCGCTCGCGACGAAGAAACGTGCTAACGCGGAGCCGCAAGCGCCTGACGCATCCGACGCGGAAATGCACG…
551	853	4642	4850	209	+	LINE/Tad1	CTTCTTTCTGTTTTTGCATTCGGAGGAAATAAAGGTGGAATGATGGATTAAATATGGGAGGGGAAGGGTGGAGGAAAGAGGAGAATGACCCGGCGAGGTGGCCTCCAATCACACATGGCTCCTGGATCAGAAGATGCTAGATGGACGAAAGCATTATCAGTGTTGGGGGACTACAACCCCACACCCAACGAACGCTCTGGGGCTTATCC
552	853	4868	5385	518	+	LINE/Tad1	CTCCCCCCCCCTGCATTTCAACAACCACCTGCAAATCGCCAAATTTTAGCGAGGATTATTGTTCAGCACCCCCAATTTACCTTTCCGCAGTATTTTCAGACCAGGCCCTCTCTTTTTCATCGTGTTACACGGTGAAAAAGAGATCTCTGGGCCCCTGAGGAAGCCCCATGCATTGGTCATCAACACCACACCCCACCACAATCAAAAACCATAAATTTTCCAGCAGAATCCCTGTTGTGACTGCAAAAACCACTTATCCCGAAATCCCGATGCCTCCGACTACCTCCGTTGCCGAGAAACAACCTGTCTCTCCTGACAAACCTCCCTCATGCGTGCTCGTGAACAAAAAATGCACTAGCACAGAGCCGCACACTATTCAGCAATGCGACACATATCATG…
553	856	1	439	439	+	LINE/Tad1	CTGATTTTGTTTTGCTCCTTCCCCCTCGTGCCCACCACAAAGTCAACTGCACTGCTGCGTATGTCTCCCGGCTCAATCCCCATGTCTGAGTCATGCCCAGGCCAGATGTCAGCAGAGACCCTGACCTACAGGTCCTAGAGGTCAGCACCGACCTCATCCCCGCTTTTTACCTTTTGAACATCTATAACGAATGTGACCCCATTACCAAAACCTACACTATCCCCCGTGTGCTCACCCCACTTACCCTCCTGCGTCGATGCGTCATCACAGGGGATCTCAACTCCCATCATCCTCTGTGGAACTCCCACACGCCCAGAACAACATCGGCCGAAGAGCTCATTGAGCTGTTGGAATCACATAACTGGCGGCTGGTGAACATCCCAGACGTCCCAACCCACC…
554	856	440	1221	782	+	LINE/Tad1	CCTGGCTTCCCCATCGATGGCAAGGGAAATGACAAACTGGGCCATCGACGACGGAATAGCCACAGGTTCAGACCATGAGGTCATCTGTTTTCAACTAAACTCTCTACATCCGGACCACACGGCAACCCCCCTCACAACTACTCATCTAAACTGGAACAAAACGGACTGGGATACGTTTAACAAGGAGCTGCAGCTCCTCGCAGAGGCCAGCCACCCATACTGGACACACCTCCGCGCCAACCCCTCCGCAAGCAACCTCAATGAGTGGGCTGCCCTACTCTGCGACTCCATACAGAGTGCTGCGTCCAAGGCCACCCTGACCCTATCACCCACCCCGCGCTCGAAACGGTGGTGGAATAAGGAAATCCGCCACACCCATCGTGAAAAGACCACCGCCAG…
555	856	1255	2275	1021	+	LINE/Tad1	TGTCACTCGAATACCGCCTCCCCCTGCGCTCTCAATAACCACCTGGCAATCGCCAGATTTTCGAGTGGATTATTGTTCAGCGCCCCCAATTTACCTTTCCGCAACATTTTCAGTCCAGGTCATCTCTTTTTCAACGTGTTACACGGTGAAAAGGAGATCTCCGGGCCCCTGAAAAAGTCCAGTGGCACGGTCATCAAAACCCCCCCCCACAACCACCAAAAATCATCGAATTTCCGGCGGAATCCTTGTCGCACCCGCAAAAACTACCTATCCTGACATTCCGATGCCTCCCCACTCCTCCGTTGTGGAGAAACACCCTCTCCCTCCGGACAAACCGCCCACACGGGACCTCGCTACCAGCAAACCCGCTAACGCAGAGCCGCAAGACATGCATGCATG…
556	857	13746	14106	361	+	LINE/Tad1	GAAGATGATGGGAGTGAGGTGGGGAGGAGCAGCATGTAGGCTGGGAAGAAAGAGTGGGATGGAGGAGAGGACAGCAGGGGAGAGAGGGGTGATGGGCAGGGGCAATGTGGGCCCAGAGATGTTATCATGCAGAGGAAATAAAGGTGGAAAAATATATGAAAAAGGTGGGGGGAGGGTGGAGGATAGGTTGGGGCCTGGTGTAGTGGCCTCTGTGTGAACAGGGCACTTGGACCAGATGATGTGATATGGACAATAACCTGGAGAAAATGGTGTTACAGGACCCAACAACATAAGACCTGTACTGGGGCAGAGCCCAGAGGGAACCTGAATATTATGTTCAGGCTCCTTATTTTTGTATTTA
557	860	253	619	367	+	LINE/Tad1	TCAAATCAAACATCCATGTCACCCCTCGACCGGATGTCTGCGGAGACCCAGACCTCCAAGTTCTCGAGGTCAGAACCAATCTGATTCCCACATTCTTCCTACTCAACATCTATAACAAATACGACCCCCACACAAGACTCCACACAATCCCCTGTTCCCTTGCCTCACTTTCCCTTCCCCAGAGGTGCATCGTCACTGGTGATCTCAATGAACACCACCCCCTTTGAAATTCCCGAGCAAGACGTCCTACATGAGCCGATGAACTCATGGAGCTGATCGAGGAGCATGGGTGGCACCTCGTCAATGTGCCGGACGTCCCAACCTACCACTATAAAGACGGTACAGGATCCTCGGTCCTAGATCTCAC
558	860	627	3597	2971	+	LINE/Tad1	GCGCCAGCAGTGTCAAGGGAAGTGACAAACTGGGCCGTCGATGAGGACAACGCCACCAGCTCTGACCACGAAGTTGTATGCTTCCAGGTAAACACCTTACACCCCGACCTAGACATGACCTCCACCCAGCCACATCTCAATTGGCGAAAAACCGATTGGGCCACCTTCACCATGACCCTCCAACACCTCTCCAATGCTGCCTGCCCCCACTGGACCCACCTCCGCCAACACCCCTCCCTAGCGAACCTTGACGAATGGGCAAATCAGCTGCATGAAGTCATAAAAACCGCCGCCGAGAAATCCACCCCCCTGCTGACCCCCACCCCTGGCTCGAAAAGATGGTGGACCACGGAGCTCGAACAAACTCGGAGGGATATGTCCCGTGCCCAGAGACGATGG…
559	861	1	1297	1297	C	LINE/Tad1	ATTCTTATTTGGAAGCCCCAAATTACCTACCCGATGCCTCCTAAGACCAGGCCCTCTCTTTTTCGTCGTGCAAACGAGGAGAAGGAGAATCCGGGCCCCTGAAGAAGCCCTCGGAGCAGGAGACACCACCCCCCACCAACCCTGCACAACAGAACACCTCGATTTTCCAGTCATTCCCATATCGCAAGACCAACACAACCTTATCCCGAAAACCCAATGGCACCCCGCACCTCCACTGGCAAGAAATGCCCCATACCCGCCAACAAAATGCCCCCCTTCGACCTCACCTCGAGCCAACACGCTAGCAGAGAGCCACATGCGATGCAGGAATGCGACGGGCTGAACGACACCATGAATGTTGACTGTGACATCAGCAACAATGAAACCGCGTCTCCCTCC…
560	862	556834	557063	230	+	LINE/Tad1	AGATTACCGGGGGTGTCTCCTTTGTTTATTGTTTTCATTAGGCGGTATGGGAGTAGGAGACGGGGGTGCCACAGTTGACGTCTTTATTTTTATTGTTTAGACGGTGGACAGGAAACTAGGGGGGACGCATGTAAGGCCCCTACGGGGCAGGCCCTTCGGGCAAGCGGTGCCATATTCTAGCTAGAATGCATGCACCGCTATAGCAAATATACTGATTCAAAACAAAAAAA
561	863	322	1209	888	+	LINE/Tad1	TCACTCGTCCAGATCCACTGACCAATGCCGCCGATGCCTGCTGTTTGGCCATCACCACGCAGTGTGCTCCTCTGCCCAAGGACCCACCTGTGCCCTTTGCGCAGGTCCGCACTCTACTGACCTCCACAAGTGCCCAGACTGCCCAAACCGCACAGGTAAATCCTGCCAACACACAACATACAAATGCGCCAACTGCGCCGCAACTGATAACACCAATACGACCCACCCAGCTTACCACCCCCGCTGCCCCGTCAAAGGAGCCGTAGTGAAAGAAGCATGGCAGAAATCGAGAGCTACCAAACCAACCACTGCCGAATACCCCAACGACACCACCATGACCGCCGATGCATAGAAACACAGCACCAGCGGCGACCCTTCGCATTGTGTCTCATAACACAA…
562	868	9	552	544	+	LINE/Tad1	ACCATCCGCTGGGTCCCAGGACATACCAACATGCCTGGGAACGAAGCTGCCAACGAACTGGCTCGACAGGCGACTACAGTCCCGCCACTTAATATCCCTCACCTGGATATGGCGCCGCACTCGAGAACGGTACACCGAAGACTGGGCTACCTGGTTTACCTCATCCCCTCAGCCACGCACGTACGCCGCTACACACCGCCGCAAGATGGACGCAGCCTACACCGACAACCCCCGCTGGATATCGACTGCAATCCTGGGTCTTCACACCGGCCATGGATACTTCCTCAACTGCCTAGCCCACCCTCCCACAGAAGCATACCCCTCCCGGCGATGCAGCTGCCCTATCCATCTGCCACAGACACCTCGACACATCCTCCTGAGCTGCCCCAAATTCCAGGC…
563	868	1150	2061	912	+	LINE/Tad1	CCTGCCCCCCTGCGTTCTCAACAACCACGCCGAAATCACCAGATTTTCGAGTGAAATGACGTTCAGCATGCTCAATTTTCCTTACTGCATCGATTTCAGATCAGGCTCCCTCTTTTTCAGTGTCTTACATGGTGAAAATGGGATTCCCGGGCCCCTGACAGAGACCTGCAGTGTGGCCATCAACACCCCACCACACAACCACCAAAAACCATCCTTTTTCCAGTGGAATCTTTGTTGCACCCGCAAAAACAGACTATCCCGAAACCCCCATGTCTCCCCACCCTCCCGTGGTGGAGAAAACCCCTCCCTCTGGAGCAAAACCTCCCCTTGCAATGCTGCAACAAAAAAACACACTAGAACAGAGCCGCAGCCCCTGCAGAAATGCGACGTGCACGCCGA…
564	873	1	807	807	C	LINE/Tad1	GATTATTGTTCAGCGCCCCCAATTTACCTTTCCGCAACATTTTCAGACCAGGCCATCTCTTTTTCAACGTGTTACATGGTGAAAAGGATATCTCCGGGCCCCTGAAAAAAAGTCCAGCGACACGGTCATCAAAACCCCCCCCACAAAAACCAAAAATCATCGATTTTCCGGCGGAATCCTTGTCACACCTGCAAACACTACCTATCCCGACATTCCGATGCCTCCCCGCTCCTCCGTTGTGGAGAAACACCCTCTCCCTCCCGACAAACCGCCCACACACGACCTCGCTACCAGCAAACACGCTAACGCAGAGCCGCAAGACATGCATGCATGCGACGCGAACGGCGACGTGATGCACGTCGATTCTGACGTCATCGACAGCGAAAGCGACAACGACGC…
565	875	46	1846	1801	+	LINE/Tad1	CCCGACACCATCAACATATGACTACCAAATGGAACAGTGGTGAAACCAGGCACACCCGGGGGCAGAAAGGACATGGCCCGCTGGATTGGAATTTTATTTGATAGACAACTGGCCTTCCCCCATCATGTACAAGCAAAACTAATGGCTGCATCTAGGTCCTTCACTGCACTCTGCAGCCTTGTAAGACATGAAACAGGGTTGTCTCCCTCCGCAACATGCTCACTTTACCGTGCAGGCATCCTCTCTAGGTCCAATATCGGAGCTGAGATCTGGTGGACAGGGTAAAAAACTCTCCAACGATGCCTCAAAACTCAACAAAACTCTGCCCTCCGCCGAATACTCAATACCTTCAGATCTACCCCAACAGTTACACTACACAACAAAGCTGCCCTCCCGGCC…
566	875	2019	2935	917	+	LINE/Tad1	CCCCCCTGCATTTTCAACAACCACGCTGAAATCGGAAGATTTTATTGCGGATTACTGTTCGGCATCCCCGAATTACCTATTCGCAGCATTTCCAGACCAGGCTTACTCTTTTTCGTTGAGTTTTCATCGAAAAAGAGTTTTCAGGCCCCTGAGAAAAGCCCCGCAAACATGGTTCCATCAACACCGCACCCCACACACATCAAAAATCATCATTTTAATCGCGGATTCCTTGTCGCTACCGCAAAAATACCTTATCCCGAAACTCCGATGCCTCCCCGATCCTCCGCTGTTGAGAAACAGCCCCTCCCCCCCGACAAAGCACCCCCTCGGGCGCCGCGACGAAGAAATGCGCTAATGCGGAGCCGCAAGCGCCTGACGCGTCCGACGCGGAAATGCACG…
567	879	69	642	574	C	LINE/Tad1	TGGCAGCCCTGGCAATGGCAAGTGAAATTTCTGCTTGGGCCATTGACAATGGCATTGCCATGGGATCAGACCACGAAGTGATCTTCTTCCAAATGAACTCCTTACACCCAGACCACCACAACACAGCCGGCAACACTACATGACTGAACTGGCACAAGACAGAATGGAAAACCTTCACCGACGAACTGCAACGCTTCACAGAAGCTTCCTACCCCCGGTGGTCCCCCCTCCAAGCCAACCCCTCTGCCGAGAACCTTGATGAATGGGATGCCCTCCTCCGCAACTCTATCCAAAACGCCATCACGATATCAACACCTACCCTCACCCCAACCCCACGGTTGAAGAGGTGGTGGATGGAGGAAGTACGCTCGACATGCAAAGACATGACCCAGGCCAGGT…
568	879	645	2093	1449	C	LINE/Tad1	GATAGCTCCAAGATTGCCATTGGATTAGCTGTCAACGAAGCCCTACATGAGGCTAAGGTGGAAGGCAACATCATGATGGTTAAGAAAAACATCGCAGGGAACCTCATCCTTACCCCCTCCCCGAACACATCCATCACTGACCTCACTCCCCACCTCTCTGTTATCCACACCACCACCTGCAAAGTCCACCAGAACCTCCTGCCCCCCCAACTTAACGAAAAATGGTATAAGCTGGCAGTCCATGGAATCCCCATGGACTACTATGAGGATACTGCTGAGGGTATGCAAAAACTGCAGCAAGATATCGAGACAAACCACAAAGTAAGCCTGATGCAACCCCCAAGGTACATCTCCCACCTGGACAAGCATGTTGGCAAGACTGCCTCCAGGGTGATGATC…
569	879	2115	3950	1836	+	LINE/Tad1	CCCCCCCCCTGAATTGTCAACAACCACCCAGTAACCGCGAGATTTTCGAGCGGATTATTGTTCAGCACCCCCTATTTACCTTTCCGCAACATTTTCAGTCCAGGCCATCTCTTTTTCAAGGTGTTACATGGTGAAAAGGAGATCTCCGGGCCCCTGAAAAAGTCCAGCGGCACAGTCATCAAAACCCCCCCCGCAAAACTACCAAAAATCATCGATTTTCCAGCGGAATCCTTGTCGCACCCGCAAACACTACCTATCCCGACAGTCTGATGCCTCCCCGCTCCTCTGTTGTGGAGAAACACCATCTCCCTCCTGACAAACCGCCCACACATGACCTCGCTACCAGCAAACATGCTAGGGCAGAGCCGCACGACATGCAGGCACGTGACATGAATGGCG…
570	882	42	1647	1606	+	LINE/Tad1	CCCGCAACGCCCTGGACTGGAACCCCCTCCACCACTGCCCTCTTCCCCAATGCCCCCCTCACCCCACCCAAACACACCCTGAAGACCCCCACCCCCAAGAAGACCCTCCTGCCCAAGAAAACTCCGGCCTGCTCCCAGGACATGGTCATCCCCTGCCCCTACCCCTGTGCACTTCCGGACAGCACAAAGACCCAAATCGGACTGGCAGTGAACACCGCCCTACGTAAGGCAAACATTCCCACGAACATTGCTATCATGACGGTTTGTAAGAACATCTCCGGTAATCTCCTCCTAACCCCATCCCCCAATACCCCTGTCTTCGACCTTCTTCCCCATCTGCCCCTCATCCACGAAGCTGCCCGTTCCATGCACACCTCCCCCCTAACCACAAGGATGAAC…
571	882	1658	3481	1824	+	LINE/Tad1	CCGGCAGTGGCAAGGGAAGTGACAAACTGGGCCGTCGATGAGGACAATGCCACCAGCTCTGACCATGAAGTCCTACGCTTCCAGGTAGAAACCTTACACCCCAACCTAGACACGACCTCAACCCAGCCATGCCTCAATTGGCAAAAAACCGATTGGGCCACCTTCACCATGACCCTCCAACACCTCTCCAACACAGCCTGCTGCTGCTGGGTCCACCTCCACCAACACCCCTCCCCAGCGAACCTTGATGAATGGGCAAATCTGCTGCACGAACCCATAAAAACTGCTGCCATGAAATCCACCCCCCTGCTGACCCCCACCCCTCGCTCAAAAAGATGGTGGACCATGGAGCTCAAACAAACTCAGAGGGATATGTCCCATGCCCGGAGACGATGGAAA…
572	882	3550	3821	272	C	LINE/Tad1	GCAGGTGGCCGGGAGGGGTTATCTGATTCTTGTTGTTTTGAACGAAATAAAGGCGGATTAATGGTTAAAAAAGGAAGGGGAAGGGTGGAGGAAATGGGGGAACGACCTGGCGAGGTAGCCTCTGAGCGCACAGGGCTCCTGGAACAGATGATGCGAGATGGATTATGAACCAAACGAGACTTGGGGGACTACAACCCCACACATGAAGACTGCTCTGGGGCACGTCCCAGTGGGGACCTGGGGTAACAGCCAGGCCCTCAAGTATGTATTTA
573	887	1822	3527	1706	C	LINE/Tad1	CGCAGCATTTCCAGACCAGGCTTACTCTTTTTCGTTGAGTTTTCATCGAACAAAGAGTTTTCGGGCCCCTGAGAAAAGCCCCGCGAACACGGTTCCATCAACACCGCACACCACACACATCAAAAATCATCATTTTAATCGCGGATTCCTTGTTGCTACCGCAAAAATACCTTATCCCGAACCTCCGATGCCTCCCCGATCCTCCGCTGTTGAGAAACAGCCCCTCCCCCATGACAAAGCACCCCCTCGGGCACTCGTGATGAAGAAACGCACTAACATGGAGCCGCAAGAGCCTGAGGCATCCGTCGCGGAAATGCACGTAGACACATGCTCTGATGTTAGCGAGGACTTTAGCGACGACGACGCATCTTCCCACGCGGACTCCCCCACACCTGCCAC…
574	887	4094	5004	911	+	LINE/Tad1	CTCACTTAACCCTGGGATCCCGCAAGGTTCCCCAGCATCACCCATCCCTTTTCTCCTGTACCTATGCCCACTCTTCAACGAACTCAACCTCCCCCATGCCCACACATGGACCCCAAGTTATATTGATGATGTAGCGTTGGTGGCCCACAGACGCACCAGAGAGGATAACGCCCGGCAGCTAGAAGCGGTGGCACGCACCGCCTTCAGGTGGGCTGAAAACAGTGCCATAGCTTTTGACGACGCCAAGTCCGAAATGCTTCATTTCCACCTGTGAAGACAGACACTCCACAACAACAAACATACGCCTACCGAACGGCACTGAAGTCACCCCAGGCACAAGAGGAGGAAAGAAGGATACGGTCCGGTGGATAGAGATTTACTTTGATAGAAAATTATCGT…
575	887	5017	6946	1930	+	LINE/Tad1	ACCACACAGCAACCGCTGACCCCCCCTGCATTTTTCAACAACAACCTCAAATTTCCTGGCGCTGCCGATGGAAATCGCCTTATCGCACACTGTTTACCCCGAATCCCGAATTCCAGGCCCGAATTCCTGTTTACCTTTGAGTTTCAGCGGAGAAACGCGATTCCGGGGCCTCCGGACCGGTCAACGGGCCTTTCCATCAACGCCGCCCCACCTCCCGCGCTCCGGTCATCAAACAAACCTTATTTTCGGTTTCGGCATACCGAAATCCCCCCCTCCCCAAATTCCCCTATTGCCAGCAGCACTGGTTGTGGTGAAACCCAAAATTTCCCTCCTTTTGGACCCTCCTTTCTTCACGACAATTCTTTCTCACTTAACAGAGCCGCATCACGTGATCCTTCG…
576	887	7274	7537	264	+	LINE/Tad1	GGGGCAGAGGGAGTACATGAGGCGAAATGAGGGGAGAGAGGGGCGCAGGGAAGGGGCAGAAGAGGCCGGCGGGAGTCATCCTTTCTTTGTACGCGGTGGAAACAAAGGCGGGAAAATGGTCAAAAACATGGGCGGGGAAGGACAGGAGGATCGGGAGGAGCCCGGCGAGGCGGCCTCTGTGCAAGCAAGGCACTTGAAACATTCGAAGTGCTTGGACAAAAACCCCCTTAGTAACAGTGGGGACAGACCCCCCAACCACAATGA
577	887	7670	7958	289	+	LINE/Tad1	CAACCCATGCCCCGACCCCCGCACATTCCCGGACAGCGCAAAGATCGAGGTTGGAATAGCCATCAACGCAGCCCTCCGTAAAGCCAAGGTGCCCGATACCGTGGCCATCATGAAGGTCAGAAAGAATATCTCCGGCAATCTCCTTCTCACCCCCTCCCCCGACACTCCCGCCTCCGACCTCCTCGCCCACCTCCTCCTTATTCATGACGCAGCCCGCTCCGTACACTCATCCCTCCTAACTCCTAGACGCAATGAGAAATGGTACAAGCTGGCAATCCACGGCATACCC
578	889	32510	32713	204	C	LINE/Tad1	AGAAGGAAGGCGATGGGCAGGGCAGGCCCATCATCTCGGTGGCAACAAAGAGATATTTGACGCCGAACAGCATGCCATTTATGAGGCGCTGGTTGGCTTCGCTGAGCGCGGTAACCGCGGTGAACGCAACCGCCATTTCACGGTATTCTCGGATGCGCAGGCAACTCTCCAACGCTGTGCTTCCGATGCCTTCGTCCCGGGCCA
579	890	29	1021	993	+	LINE/Tad1	ACCAAGGTGGTGGTACTTTTTGAGCAGCACAAGGAAATGGAATTCTTTAACGCCCAGTCTGTCGACCAATGCCGCAGATGTCAGAAATTTGGACATCACCATGCCACCTGTGCCGCAGACCAAGGACCTACCTGTGCAATGTGCGCAGGCATCGACCCCACTGATTACCACCAATGCGCAGAATGCCCTGGGCGGAAAGGCCGATCTTGTACGCACACCAAATATAAGTGCATCAACTGTGCCGATGCCGGACACAGCAACACTGCGCATGTGGCCTATAACACCAAATGCCCCGTCAAGATCGCCGCAGTTCAAGAAGCATGGCAAAAGACCAGACCTGACCCCACCACCTCTGACAAGTCCCCCGCTGATGCCACCATGACTGCTGATGAATAAATA…
580	890	1026	2100	1075	+	LINE/Tad1	GCGGCTCCAGCGATAGCCAGGGAGGTGATGAACTGGGCCGTTGACGATGACATCGCCACTGGCTCAGACCACGAGGTCATTCGCTTTCAATTAGACTCCCTCCACCCCGACCTCGACACTACATCCACCACCCCCTGCCTGAACTGGCACAAGACAGACTGGGCAGTCTTCACAGACACCCTACAACGGCTGTCCGACACCACCTACGCCCGCTGGACCCATCTCAGAGCCAACCCCACTGCACGACACTTAGACGAATGGGCAATCCTTCTCCAGGACGCCATTCAATGTGCAGCCAAAGCCGCCACACCAGTGTCGGTCCTCACATCCCGCTCGAAGAGATGGTGGACAGCGGAACTGGACCAAACCTGCAAAGCTATGACCAGCGCCCGCAGATGC…
581	890	2102	2754	653	+	LINE/Tad1	CGACTTCGCCCTCATAACCCATGGCCGAACACGCGAAGAAAACGCCCGAGCCCTGGAGGCTGCAGCCCGCACGGCCTTCGCCTGGGCACAAAACAACCCTGTCGCCTTCGACAACTCCAAGTTGGAGCTCTTGCACTTCCATCATGCTTGCGATGACACTCACACTGCAGACACCAATGTCCGCCTGCACAACAGCACTGTCGTCACCCCCAGTACAAGGGACGGACGATGAGACGTGGTCTGTTGGATAGGCATCTATTTCAACCGCAAACTCTCCTTCACCCAACACGTCCACCTCAAGCTAACAGCCGCATCCAGGTCCCTCAATGCCCTGTACAGCCTAGTCAGGTACGAAACAGGTCTGTCCCCCTCCGTGACCTGCACACTTTACCGCACATG…
582	890	3351	4604	1254	+	LINE/Tad1	CCATCCTCCTTCCTCATCCCCAATCATTTCTACACCTCTATGTGTGACCCTCATGAATATGACTGTCAGTGGCAAACAGCCAGACGCCACCGCTCCCGACTAGTAGGTATGCTCAGTAAGATGAGCCCATGGGTCCTTCCGGATGACTTCATAGAAGACACGGCACACCTGATCACCACCCCATGGGAGCCCACCCCCATCGCAATAGACATACCCTCGCTGCCCAAAGACGAAGCGGCCACCAAACACTCCTCCCTCCTCTGAAAACTCCACTGCCACAACACAAACAGCATCGGATACACGGACGGCTCACAGCTCGCCGGCAACATGGGGGTGGGATACTACATCTCTGATGGACTGCCATGTGAGGTCTGCGCCATCATCCCCATGGGCGACACC…
583	892	3	529	527	+	LINE/Tad1	CCACCCCCAACCCCTCCAGAAACAATGCCCCTGCCCCATGAAAAAATCCCCCCAAAGTTCAACCCCCCCATCCCGTGAGTGTAATCATCCCGTGCCCTGACCCCGAAAACCTGATGGACGACATCAAAGTCCAGGTAGGAAACATGGTCAACCGAGCTCTACGTGAAGCAGAGGCACCAGAAACCATCGTGGTGGTGACTGTATGCAAGAACCCTGGTGGCAACCTCATACTAACTTTCCCCCCAAACACCACCCAAAACGAAATTACCCAGTTCATCCCCATCATGCATGAAGCTGCACAGTCAGTGCACATGACTCTACAATACCCCCGAGTGGCCAAAAAATGGCACAAACTGATGGTCCACAGTATCCCCCTAGATGCCTACCCTGATACCCCTG…
584	893	21467	22386	920	+	LINE/Tad1	ATATCCAAGCCCGATTAACACAGGCATCCCGCAAGGATCGCCAGTCTCACCAATCCTATTCCTCCTCTACTTCCGCCCCCTCCTCAATGCCCTACAAGCCGCCCACCCCATGCTATGGGCACCCAGCTACATCGATGATGTTGCCCTGGTGACCCATGGCAGGACCCATGAAGAAAATGCCTGCATGCTTGAAAAAGCCACCTACACAGCATTCCAATGGGCAGAATGGAACTCCATTGCCTTCGATGACAGCAAATCAGACATGCTATATTTTCACCATGCAAGACAAGATACCACGCCCAACATGATAAACATCACCCTCTCCAATGGCATGATAGTTTGGCCCAGAACGCAAGGAGGCAGGAAGGACATCATCCACTGGATTGGAATCCTATTCGA…
585	893	22973	23300	328	+	LINE/Tad1	TCAGCACTTGGGTACTCCTCAATGATGACATAGAAGACACCACCCAAGCCATCATGAACCCATGGAACAACCCCCCCATCACTGTTGACATCTGCAACCTGCCCAAAGACGAAGCCACAACTGCCCACCTTCTCCTCCTCCAAGACCTCTGCGATGACCCCCACAATATCATTGCCAACACCAACTGATCACAACAAGCCTCCCAGACTGGCACCAGATTCTACATCCCCCACAGCTTCACCGACCCTGTCCGAGCTGTCATCCCCCTCGGCACCACCTCCGAAGTATTCAATGCAGAACTCAGGGCCACAGCAGAGTGCCTCCACAC
586	894	57	1253	1197	C	LINE/Tad1	CCTGGCTTCCCCATCGACGGCGGGAAATAACAAACTGGGCCATCGACGACGGAATAGCCACAGGTTCAGACCATGAGGTCATCCATTTTCAACTAAACTCTCTACATCCAGACCACACGGCAACCCCCCTCACAACTACTCATCTAAACTGGAACAAAACTGACTGGGATACGTTTACCAAGGAGCTGCAGCTCCTCGCGGAGGCCAGCCACCCATACTGGACACACCTCCATGCCAACCCCTCCACAAGCAACCTCGACAAGTGGGCTGCCCTACTCCACGACTCCATACAGAGTGCAGCATCCAAGGCCACCCCAACCCTATCACCCACCCCGCGCTCGAAACGGTGGTGGAATAAGGAAATCCGCCACACTCATCGTGAAATGACCACTGCCAGGT…
587	897	1196	3413	2218	+	LINE/Tad1	CCCCCCCCCTGCCTTTTCATCAACCACCAGGAAATAATCAGATTTTCGAGCGGAATACTGATCCCCAGGCCCAAATTACCCATACGCAACTTTTTCAGACCAGGCCCCCTCTTCTTTGTTGTTGACAGCAGCAAAGAAGAGATCTCTGGGCCCCTGAAAACGTCCTGTGTACAGGACATCAGCAACCCCCCCCCCCACACAATGCAAAATCATCAATTTTCTGGCAAATCCTATATCGCAACCTCCTACTCTACCCATCCCGAAAACCTGATGGCCCCCCGAACCGCAACCGTCAAGAAACGCCCCGTACCCCCCAACAAAACCCCTACACGCGACCTCACCACCAGCCAACACACTAATGCAGAGCCGCACATGACACAGGAATGCGAGGCACTGCAC…
588	898	70	2640	2571	C	LINE/Tad1	AATCACTAAACTCATGGTTGCACGAAGGGTGCACACAACAAAAAGTCTCGCCGCTGTCTCTACAGCAGTATGAACCCCCTACCCAATGCTCCTGGGACCATTGCAGCATCCCCCTTTAATTCTCCCCATGAGAAAAACACCAAGACACCCCTCATGGAGGCATTCCAGCTCTCTCAACAAGGCATCCTGTTTGACACCCCATCCACCCCCCAAACCATCCAGACAGGTGACAAGCGACCCAGTGCTCCACTCCTGGACACCTCTGAATGTGCCAGCCAATAGCTGTGCCTACTCCACAGTGCTGCAGATAAGCAGGAAGAACTACTCACCACCATACTGCAAAGATCTGATGTCATTGAAGAGATTGGTTGTGCCCTTGATGCAAGGGTGGCCAAATTG…
589	899	104967	105280	314	C	LINE/Tad1	GGAGTCGGATGATGAGGATGACGAGGCGGATGAAGTGGAAGACGAGGAACGAAGAGAGGCGGCGCTGGCGGAAGCAATGACGTGGTTGGCTGAGATTTTCGGGGACGAATTGGCATAGAGATTGGCGTTGTATTTTCTTCTTATTTTCGTTTATATTTTCACTTTGGGTACGGATAGAATAGGGGAGCGACGGGGGCAGGGGATCACACAGAACTTAGACGCATTGGATGATATAAAGCACGCTAGTAAATGGATATTAGATTTATGTATAGCAGAAGTCCCATAGGACAACTTAATTGACTTATTAAAAAAAA
590	900	22881	23125	245	+	LINE/Tad1	TGTAGGCTTCGGCCAGATTACCCGGGGTGTCTCCTTTGTTTATTATTTTTCATTAGGCGGTATGGGAGTAGAGGACGGGGGTGCCACAGTTGACGTCTTTATTTTTATTATTTAGACAGTGGACAGGAAACTAGGGGGGACGCATGCAAGGCCCCTACGGGACGGGCCCTTCGGGCAAGCCGCGCCATATTCTAGCTAGAATGCATGCACCGCTATAGCAAATATACTGATTCAAAACAAAACAA
591	900	29638	29857	220	+	LINE/Tad1	AAGCGTCACTGGTAATTAACGGCCACCAACCAGCAATGGAACCTACAAACACGGGAATCCCCCAGAGATCACCGATATCCCCGATATTATTCGCAATCTACATTTCCGGGGTATTCGAAGAAGTTGAAGCCGAAACCGGAGCAGTTGGAATATCCTTCGTGGACGACTTATCGTGAATAGCCTCTGGAGACAACGTAATAGCGGAAATGCTGGAAAAATG
592	906	1986	2353	368	C	LINE/Tad1	AAGGAGGCATGTGTGGAGAGTGTGAAATGATGAGTGGCGACGGAGGAAGGAGGCAGCGAAGAGAGTGAGCAGGAGATGGAGGGGGGCGGAGGCCCGGAGGAGTTAAGTTTGCTTTCTTTTGTTTTGTTTATGCTTTAGGAGGAAATAAAGGTGGGCAAATGGCTAAAAATGGGACAGGAAGGGAGGAGGAAATGGGGGAATGACCTGGCGAGGTGGCCTCCGAACGAACAGGGCTCCTTGGACTCGACGACGCTTATGTACCAAACACTGAAGAGAGTTGGGGGACTACAACCCGACACCCAATGACGGCTCTTGGGGCCTATCCCAGTGGGGACCTGAGGTAACAGACAGGTTCCCATTCTTTGTAT
593	908	853	4087	3235	C	LINE/Tad1	GCGCCAGCTATGGTACAGGAGGTGACGAACTGGGCAATCGATGAGGATAATGCCACCGGGTCTGATCACGAAGTAATCCACTTCGAAATAAGCTCGTTACACCCAGACGTGGAGTTCAACACTCCTGCTCCTCGCCTGAACTGGAAGAAAACAGATTGGGATACTTTTGCCCTCACCCTACAGAAGCTTTCCGAGGCCGCCCGCTCCAGATGGCGCTCCCCGGGCCAATTCCCCACCCACACAACGCCCGACGCCCAAGCAGACCTCCTACGAGACATTATTGTCGAAGCTGCCACCACCGCCACACCCCCCACTACACCCTCGCCTCGATCAAAGAGATGGTGGACACAGGAAATCACAGAGGGCCGGCATGAGATCAACAACGCCAGGAAAAAATGG…
594	910	1	2940	2940	+	LINE/Tad1	CCACCACCTCCATCCATCCTTCCCCCTCGCCACGAGTTGACGTGGACAACCTTTACACCGGCAGAGATAGTGACAGCAATTTTTTCCTCATCGCCAAAGAGAGCGCCCGGGCCCGATGGACTTACGTTCGCATGCCTGCGCCGTGCATACCTGGCCGCCCCTGAACACATGAATGACCTCTACCCCACGTTAGGGACGGTAGGCTACCACCCGCATTGCTGGAGACAAGACACCACGGTGATCATAGCCAAACCTAATAAGCCAGATTGCAGCAATCCAAAGGCATACCGCCCAATTGCGCTCCTGAACTGCCTAGGAAAGACACTCGAGAAACTAATGGCCACTTGCCTAAGCACAATGGCAGACTCGTATGACTTACTACACAAGGACCAAATAGGA…
595	912	168	567	400	+	LINE/Tad1	AAGACACACAGGGGAGGAGGGGAAGAAGGAGAGGGAGTCATGGAGGCGAGGGACATAGGGAGAAGTGCAGGAGTAGAAGGAGTACTGGAGAAGGGAGTGAGGAGAGACAGGGGGGCAGTGGCCCGGCAGAGTTATCTTTTTCTTTTCTTTTCTGTTATGTTTTGGTTTGTGGAGGAAATAAAGGTGGGAAAACGGCTAAAAATGGGTGGGGAAGGGTGGAGGATAGAGGCGAACGACCCAGCGTGGTGGCCCCTGAGCACACAGGGCTCCTGGAACTGATGACGTGAGATGGATTAAGACCCAACAAGATGGGAGACTACACTGCGAAACCCTCATATCAGCTCTGGGGCTTACCCAGTGGGGACCTGGCATTGCACCCAGGTCCTTAACATTGTATTTA
596	912	751	2708	1958	+	LINE/Tad1	TATCACTCGACTACCCCCTTCCCCTGCATTCTCAACAACCACCCGGCAATCGCCAGATTTTCGAGCGGATTATTGTTCAGCGCCCCCAATTTACCTATCCGCAACATTTTCAGCCCAGGCCCTCTCTTTTTCATCGTGTTACACGGTGAAAAAGGGATCTCCGGGCCCCTGAAGAAGTCCAGCGGACAGGTCATCAACACCCCACCCCACAAACAACAAAATTTATCGATATTCCTGCGGAATCTTTGTCACGTCCGCAAACACTACTTATCCCGAAATTCTGATGCCTCCCGACTTCTCCGTTGCGGAGAAACAACCTCTCCCTCCCGACAAACCTCCCTCACGCATGCTCACGAACAAAAAACATGCTAGCGCAGAGCCGCACACTATGCAGGAACG…
597	913	2254	2579	326	C	LINE/Tad1	AGAGAGAGGGGAGAGAGGTGGGGAGGGGCAGCACATAGGCTGGGAAGAAAGAGTAGGATGGAGGAGAGGATAGTAGGGGAGAGTGGGGCAATGGGCAGGGGCAATGTGGGCCTGGAGATGTTATCACATGGAGGAAACAAAGGTGGAAAAACAGATGAAAAAGGTGGGGGAAGGGTGGAGGATAGGGGGGAGCCTGGCATGGTGGTCGCTGTGTGAACAGGGTACTTGGACCAGATAATGTGATCTGGACAATGTCCTGAAGAAAATGTGGTTACAGGACCCAACAACATAAAACCTGCACTGAAGCAGAGCCTAGGGGAAGCCTG
598	916	71	463	393	+	LINE/Tad1	GAGGGGACGGAGTAGATGATGACGGAAGGAGGCATGTGTGGAGAGTGTGAAATGACGAGTGGCGACGGAGGAAGGTCTCAGCGAAGAGAGTGAGCAGGAGATGGAGGGGGGCGGAGGCCCGGAGGACTTAAGTTTCCTTTCTTTTGTTTTGTTTATGCTTTTGGAGGAAATAACGGTGGGCAAATGGCTAAAAATGGGAGGGGAAGGGAGGAGGAAATGGGGGAATGACCTGGCCAGGTGGCCTCCAAGCGAACAGGGCTCCTTGGACTCGACAACGCTTATGTACCAAACACTGAAGAGAGTTGGGGGACTACAACCCCACAACCAATGACGGCTCTTGGGGCCTATCCCAGTGGGGACCTGAGGTAACAGACAGGTTCTCATTCTTTGTAT
599	916	530	747	218	+	LINE/Tad1	CCCTGCTCATTAACCCCCCTTGCCCTCCCCCAGAGATGTGTAATCACTGGAGACCTCAATGCCCACCACCCCCTGTGGAACTCCCAGACAAGGCGCACACCACAGGCAGAGGAGCCCATGGAACTAATCGAAGAACACCAATGGCAATTAATCAACATCCTGGATGTTCCAACCTACCACTACAGAAATGGCTTCGGCTCCTCAGTCCTCGACCTCAC
600	916	752	2873	2122	+	LINE/Tad1	GCAACTCCGGACATGGCTAGGTAAGTATCGAACTTGGCCATAGACAATGGCATCGCCACAGGATCAGACCATCAAGTAGTCCGCTTCGAAGTGAACTCCCGCCACCCAGACTCCACCATCTCAACCACCACTACGTGCCGGAACTGGCGCAAGACGAACTGGGATACCTTCATCACTCAGCTGCAAACCCTCTCTCTATCGTCCTACTGCCGATGGTCCCACCTGCAAACAAACCCATCCACCCGCAATCTCGATGAATGGGCGGCCCTTCTATGCAACACAATACGAATGGCAGCCACAGCTGCGACACCTACCCTGACCCCCTCACTGCGATCGAAGAGATGGTGGATGGAGGAAGTAAGTAGAATGCCGACAGCCATGACAGGCACTCATCGTAAG…
601	917	1557	1770	214	+	LINE/Tad1	CACCACACAGCAACCGCTGACCCCCCCTGCATTTTTCAACAACAACCTCAAATTTCCCGGCGCTGCCGACGGAAATCGCCTTAGCGCACACTGGTTACCCCGAATCCTGACTTCCAGGCCCGAATTCCTGTTTACGGTTGAGTTTCAGCGGAAAAACGCGATTCCGGGACCTCTGGACTGGTGAACGGGCCTTTCCATCAACGCCGCCCCACAT
602	918	1751	2645	895	+	LINE/Tad1	ACACTCAGCCGACTGGACCACATGGTACCATGCCTTGCTGAAACCAAAACATACAACGCCCCCTTCTGTCATCACTTAGACAGTGCATACACCTCCCTTCCCCAACGACAATCCATGGCCATCCTGGGCATCCGAACCGGACATGGCTACTTCCTGGACTGTCTCACTAACCCACCGACCAACCAATACCCCTCCTGCACATGCACCTGCTGCATGCACCCCCCCCCAAACCCCTACGCACATCCTCCTCTCCTGCCCCACTTACAATGCAGCACGAACAGAGTTACGGACCTCCCTGAAGCTACACCAAAACCAATGACTTACCCTCAGCACCATCCTCCACACCACCAGCAGCATGAAGGCCCTAGCTACCATGATCTCAGCGATGAAAGTCACGAC…
603	922	17635	19878	2244	C	LINE/Tad1	GCCGGTGCCCTTCGCATGGATGTTAAAGGAGCCTTCGACCATGTGTCAAAAACCCAACTAACCAAACGGATGGAAGAACTGGAAACAGATCCACAAATCATACAATGGACAAATAGCTTTATGACAGACCGCAAAGCCTCCCTAGTTATAAACGGACTAGAGAGCGCCATGAAGGAAACCAAAATGGGAATTCCACAAGGATCAGCAGTGCCCCCCATACTCTTCACAATTTATGTCTCAGGCATATTCGAGGAAATTGAACAAGAAATGATTGGAGCAACAAGGTTATCATTCGTAGATGACATCTCCTGGCTGCTATCAGGAAAAGACAGAACGGAAATCACGAAATTGCTGGAAGCATGCGGAGCGGCAGCAAAAGCCTGGGCAGACAGAAATGCT…
604	922	19888	22544	2657	C	LINE/Tad1	GCAGAGCACATCAGGATAGACACAGCCAAACCAACTATACATGGCAACTGGAGCGTATACAGCAAACCAAAGGCAAACGTGACAATGCTAACCCACCCAGAGATTAAAAAGATCATATTGGAATCGGCAAGAAAGACAGATCAAGCCATCATAAACATTAGAGCCATAACCCAGTGGCCAAAAATAAAAATACACCAAATACCAATCAACCCAAGATTTGCAGTGGAACTACAGAACAGCGGAGACACCGATAGAGTCTACGCAACTTCAGCAGCAGCCTAGGAGGAATCAAACTACGCATCCAGTCGGAATACGCAGTCACCGTAAACAACCTGACATGGATCAAATCCGTCACACACTACATGGAACAGGCCAAACCAGGAACCCTACCAAAACACA…
605	922	54007	54368	362	+	LINE/Tad1	CAAACGACTCGCTACCAGGTACTATCAGCTCAAGATAGGCCATGCCGTAATCTGGACGCACCTAAAGCGAATAAACACCATCCAGGACGGTAGATGCTGGTGGTGCAACGAAGGCGAACGCCAAACCGTCAGGCATCTTCTCAAATTTTGCCCAAAATGGAGACGAGAAAGGGAGATCTTGTCAAAAAAGATAAAGAAAAACCTATGGTACCACCACGACATGGCACACATGTTCGAGTATAAAGATTCGACTGAGTATATCCTTAAGTTCCTACAAACCACAGAAGGAGGTAATAGAATGAAAGAGAAGGAGAGAGAGCAGAGGGACGAGGAGAGAGACGAATTAAATGGTTGGATGGAAT
606	928	13	1884	1872	C	LINE/Tad1	GAGGAATACCGGAAGCTCTGCAACTCCCACTACAGGGTGGTCCGGCCTGCGAAGGACAAACTGTGGAAGGAGTACTTATCCCAAGCTGAGGGGGAGGACATATGGGCAGCATTCCGGTACACAAACCCCTGCCGCACACAACTAACACCCCCCATCACATCCACCATTAACGGAATCACAACCACCCACACCGACTTCCCCGGCAAAGTGTCAGCCTTTCAGGCACTTTTTCCCCCTCCCCCCTCTGCCCCGACAAACTCTCCCTCCCATGACCGCCCCCCTCTACCTTGGAATACATTCACGGCAAAGGAGGTATCGATGGCAATCACATCATCCTCACCAAAGAAGGCCCCTGGCCCTGATGGCATCACCTTCCTGTGCCTCCGCAAGACCCTGCAG…
607	929	275	792	518	C	LINE/Tad1	CCCCTGCGATTATCACCATAACCACGCGGAAATCCACAGATTTTTGTGCGGCAGCGTTATCAGCGACCTCGCTTTACCTAGCTGAAGCATCTTCAGACCAGGTCCGCTCTTTTTCATCGTGCGAACGGTGAAAAAGAGATTTCGGACCCCTGAAGCAGCCCCCGGCTACGGACTTCATCACCACCCCTCAACAACAACCACCTCAATCATCCAACTCATTTCATTCCCTCCCTTAATTGACCAAAGTAAACCTATCCCGAAAAGCCGATGGCCCCACGCACCTCTGCTGCGAAGAAAAAACCAATCCCTCCAGACAAACCCTCTCTCCCGGTGCTCGCGTCCAGCAGTCACGCTAATGCAGAGCCGCATACTCAACGCGACGTGCAAGAAACAATGCAC…
608	932	857	1337	481	+	LINE/Tad1	CCCCCGCGATTATCACCATAACCACGCGGAAATCCACAGATTTTCGTGCGGCAGCATTATCAGCGACCTCGCTTTACCTAGCTGAAGCATCTTCAGACCAGGCCCGCTCTTTTTCGTCGTGCGAACGGTGAAAAAGACATTTCGGACCCCTGAAGCAGCCCCCGGCTACGGACTTCATCACCACCCCTCAACAACAACCACCTCAATCATCGAACTCATTTCATTCCCTCCCTTAATCGACCAAAGTAAACCTATCCCGAAAAGCCGATGGCCCCACGCACCTCTGCTGCGAAGAAAAACCACTCCCTCCGGACAAACCCTCTCTCCCGGTGCTCACGTCCAGCAGACACGCTAACGCAGAGCCGCATACTCAACGCGACGTGCAAGAAACAATGCACC…
609	942	98	764	667	+	LINE/Tad1	CAATCAAGCTGTGATTCGCTGAACCTCCCACCTCTGCTGCGGCCCTGGCCAGGACCTCGCCTGGGCCATCCACAACACAGCCCACAACCTTCACTAATTCGGCACTTCCATTACCATCCGCTGGGTCCCAGGACATACCAATGTCCCCGGGAATGAAGCTGCTGACGAACTGGCTTGACAGGCGACCACAGTCCTGCCACTCCGACAACTACCGATATCCCTCACCTGGTTATGGCGCTGCACTCGAGAATGGTACACTGAAGACTGGGCTACCTGGTTTACCTCATCCCCTCAGCCACGCACATATGCCGCTGCACACCGCTGCAAGATGGATGCAGCCTACACCCACAACCCCTGCTGGATATCGACTGCGATCCTGGGTCTTCTCACCAGCCACGG…
610	942	1289	1655	367	+	LINE/Tad1	CCACCACCACATACCCCCACTGCACATGCTCCTGCCTGCTACACCCCCCTCGAACCCCCAGACACCTACTCCTATCATGCCCCTTATACACCCCCAACAGGACCAACATGAGGCGGACTCTTAAAATCCCTCGACGCTGACAACTAAACCTACAGACCATACTCCACACCAAAGCCGGGACCAAAGCTCTTTCTACCATGATCTCAGACACCAAAATTGCCACCACCAAATGGGCACATGCAACGTTAAGTAAGCTCCCCTCGAGGGAGGACACCTTTGTTCTGCTAACTACAGGCTCGGGAACGCTGATGGACTCGGACGACGAGCACGCGGAGGACCTAAACAGCCAAGAATAAAAAAAAAAAAA
611	942	1985	2382	398	+	LINE/Tad1	GGGATGAGGGGATGGAATAGATGATGATGGAAGGGGGCATTTGTTGAGAGTGTGAAATGACGAGTGGCGACAGAAGAAGGAGGCAGCAATGAGAGTGAGCAGAAGAAGGAGGGGGGCGGCGGCCCGGAGGAGTTACGTTTGCTTTCTTTTGTTTTGTTTATGCTTTTGGAGGAAATAAAGATGGGAAAATGGCAACAAATGGGAGGGGAAGGGAGGAGGAAATGGGGGAATGACCTGGCAAGGTGGCCTCTGAGCGAACCGGGCTCCTTGGACTCGACGATGCTTATGTACCAAAGACTGACAAGAGTTCGGGGACTACAACCCCACAACCAACGATGGCTCTTGGGGCCTATCCAAGTGGGGACCTGAGGTAACAGACAAGTTCTCATTCTTTGTAT
612	942	2453	4256	1804	C	LINE/Tad1	ACCCAGAAATCTCCAGATATTCGAGCGTATTATTGTTCAGCACCCTCAACTTACCTTTTTGCAGCATTTTCAGACCAGGCCCTATGTTTTTCGTCATGCTACATGGTGAAAAAGAGATCCCCAGGCCCCTGAAGAAGCCCTGTGCAATGGTCATCAACACCACAACCCACAATCACCAAAAACTATCAATTTTCCAGCGGAATCCCCATCACGCCCGTGCAAGCTACCTATTCCAAAAATCCGATGCCTCCTGGCACCTCCACTGTGGAGAAACAACCTATCCCCTGTGACAAACCTCCCATATGCAACCTCACGAACAGCCAACATGCTAACGCAGAGCCGCATGTGATGCAGAGACATGACGCATACCATGATGCGATGCACGTTGATGCGCAATAT…
613	942	4294	5029	736	+	LINE/Tad1	CTGGTACTGCCCACATGCCCTATAACACCAAATGCCCCATCAAGATCGCTGCAGTTCAAGAAGCATGGCAAAAGACCAGACCTGACCCCGCCACCTCTGTGAAGTCCCCCACAGACAGCACCATGACCGCTGATGAATAAATACACAGCTACAGCGGTGACCCTCCGAATTGTGTCCCATAACACAAACCAGTACACCACCGCCCTCACAACCCTGGTGAGCACCACAGGGAACTCTGCCGACATCATTCTCGTACAGGAAGTCAACATCAAAGACGCCAGGTATGCAGTACACCACCCTGACTTCCTTCTCCTCCTACCCCCACGCAGAAACCGCACAGTGAACTGCATGGCTGCATATGTTTCTCACATCAACCCTCACATCTGTGTCACTCCCTGA…
614	942	5703	6389	687	+	LINE/Tad1	GTCCTCACATCCCACTCGAAGAGATGGTGGACAGTGGAACTGGAAAAAACCCACAAAGCTATGACCAGCGCCCATAGATGCTGGAAACAAACATGCCTCGACACCCACCACACCAAGTACAAATGCCTCTGCAACAGTCACTACCACAGGATAAGACATCTGAAGGATTCACTGTGGAAGGAGTACCTCGCTACAGTGGAAGGAGCAGACATGTGGGTGGCCTCCTGATACACCAACCCACACCATGCCCAACTCACCCCACCCATTAAGACCCAGTTAGGTGGAGAGGAACAATGTATGTTTGGACTTCCCGAGCATAGTTGCTGCATTCCAGGACCTCTTCCCCCCCCCGCCCCCCCTCCAACCCCCCCACCCAAGCCTCCCACCCCAAACCCGAAA…
615	943	1	699	699	C	LINE/Tad1	ATCACACAGCAACCGCTGACCCCCCCTGCATTTTTGAACAACAACCTCAAATTTCCCCGCTCTGCCAACGGAAATCGCCTGATCGCACACTGTTTACCCCGAATCCCAAATTCCAGGCCCGAATTCCTGTTTACCATTCAGTTTCAGGGGAAAAACGCGATTCTGCGACCTCCGGACCGGTCAAGAGGCCTTTCCATCAATGCCGCCCCACCTCCCGCCCTCCGGTCATCAAACAAACCTTATTTTCCATTTCGGCATACCGAAATCCCCCCCTTACCAAATTCCCCTATCACCAGCAGCACTGGTTGTGGTGAACCCCAAAATTTCCCTCCTTTTGGACCCCCCTTTCTTCGCGAAAATGTTCTTTTCTCACTTTACAAAAGCCGCATCACGTGATCC…
616	943	3472	4044	573	C	LINE/Tad1	ACAACCATGATGAAATCACCAGATTTTCGAGTGAAATCACATTCAGAATGCTCAATTTGCCTTACTGCATCGATTTCAGATCAGGCTCCCTCTTTTTCAGTGTGTTCCACAGTGAAAAAGGGATTCCCAGGCCCCTGAAAGAGACCTGCAGTGCGGCCATCAACACCCCACCCCACAACCACCGAAAACCATCCTTGTTCCAGTGGAATCTTTGTTGTGCCGGCAAAAACAGACCATGCTGAAACCCCCATGTCTCCCTGCCCTCCCGTGGTGGAGTAAACCCCCCCCTCCAGAGCAAAACTGCCCCCTCATGATGCTGAAACAGAAAAACATGCTAGTGCAGAGCAGCAGCCCCTGCAGAAATGCGACACATGCACTGATGCGATGCATATCGACCCT…
617	946	42	525	484	C	LINE/Tad1	CCCCCGCGATTATCACCATAACCGCAGGGAAATCCACAGATTTTCGTGCGGCAGCATTATCAGCGACCTCGCTTTACCTAGCTGAAGCATCGTCAGACCAGGTCCGCTCTTTTTCGTTGTGCGAACTGTGAAAAAGAGATTTTGGACACCTGAAGCAGCCCCCGGCTACGGACTTCATCACCACCCCTCAACAACAACCACCTCAATCAACAAACTCATTTCATTCCCTCCCTTAATCGACCAAAGTAAACCTATCCCGAAAAGCCGATGGCCCCACGCACCTCTGCTGCGAAGAAAAAACCAATCCCTCTGGACAAACCATCTCTCCCAGTGCTCACGTCCAGCAGACATGCTAACGCAGAGCCGCATACTCAACGCGACGCGCAAGAAACAATGCAC…
618	949	163	737	575	C	LINE/Tad1	GGAAATCACCAGATTTTCAAGCAGATTATTGTTTGGTATCCTTAATTTACCTTTCCGCAGCATTTTCAGACTAGGCCCTCTCTTTTTCATGGTGTTACACAGTGCCAAAGATATCTCCAGGCTCTTGAAGAAGCCCTGTACCTTGGTCATCAAGACCACACCCCACCACAATCAAAAATGATCAATTTTGCAGTAGACTTGGCATCATGACCACAGAAACAACTTATCCCGAAATCCTGATGCCTCTTGGTGCCTCTGTTGTGGGGAAACCCTCTCTCCCCCCTGACAAAGAACCTCTCTGGGTCCCCATGCATGGAAAATGCACTAATGCAGAGCCACACAAAGAGTCTGACACTTCCAATGCTGGGTTGCACATCGACACATGCTCTGACATCAGCG…
619	949	803	1207	405	C	LINE/Tad1	CCCCCTGCATTTGAAACAACTGCACAGAAATCCTGAGATTTTCGAGTGGAATTGTGATCAGCATGCTTGATTTACCTTATTGCTCAACTCTCAGACTAGGCCCTCTCTTTTTCATCATGTTCTGCCACAAAAAAAGACCCCTGGGCCCCTGAGTATGGTCAGCAACATGGTTCATCAATGCCATACCCCCCACCAACCAAAAAAAATGGCAGAACCCATGTTGCATGACCAAAAACACTACACCTACCAATCCCCACACCCCCCCACCCTGCAGTTATGGAGAACTTGCCTCTCCTCCCTGTACATCCCCCCTCTCCATATGACCTTATGATTAGAAAATGCACTAGTACTGAGCCTCAGGCCCTGCAGCAACATGACACACTAACCAATGTGATGCAT…
620	951	10	1791	1782	C	LINE/Tad1	CCACACAGAGGCCACCAACGTCCAACTGCCCAATGGCACAATCATCACACCCAGCCTGAAGGGTGGCCAAAAAGACATCATCTGATGGATAGGCATCTACTTCAACTGCAAACTTTCCTTTACCTACCATGTACCACTTAAGCTGACAGCCACATCCAGATCCATCAATGCCCTTTGCAGCCTGGTCAGGTACGAAACTGGTCTGCCCCCATCCGTGACCTGCTCACTGTACCACACATGTGTGATTTCTAGGTCCGACTTTGGCTCTGAGATCTGGTGGACTGGGCAGAAAGGTCTTGCTCAGAAACTACAAACCCAATGGAATTCAGCACTTCGATGCATCTTGAATGCCTTCTGCTCCACGACAACCCTCGCCCTACACAACGAAGCTGTGCTCCC…
621	961	210891	211381	491	+	LINE/Tad1	AAGGTTATCCAACATAACTGCGGAAAGAGCGGTGAGGTTCTGATGGCTATCATGGAGACAGGGGTGCGGAGGAAGGTGGATGTAATTTTAATTCAAGAACCCCCCATGAGTGAAACTTACAGACACCCAGAGTATGAGTATCTACGAATGGGAGTCGGAATGATGATGGCGAGGAGAGTTGACTCGGAATGGAGGTTCTCGATGGAGGATAGATTGGTGCAAGGAGCGGAAGGGGACGTTCAGGTATTATCAATCGGAAAGAGAGGTTACATTGGAACAGAAGTCTGTATTGTGAATGTGTACAATCAGAAGAGGACACCGGAGGACAATGAACGACCGGCCCGGATTGCCGATTGGGATGCCATTTTGGCGGATGCAGAAGTTATCCTAGTCGGTGAC…
622	961	213140	213781	642	+	LINE/Tad1	CAGCGTCAAAAGGTTCGTTGGAAGAGAGAGACAACTAGATGGCTAGGGGTTTACCTTGATCATTCCTTGACCTTTGCCGCGCACAGACACAAAGTGGTTTCTAAAGACAAGTCGGCAGAAGGCCGTCTGGTCAGCTTAATCAACAAGTTTGGCATCCCCCCGGCGAGCGCTCGGAACATACAGGTTGCGGTGGTTCAGTCAACTCTATGGTATGGTGCAGAGCTCCGGTGCGATGGTTACCCTAGGTTGACATGACATTTCCAGTTAGCAATTAACAGACTGGCAAGAGGCATGTTAAGATGCTTCCGTTCAACTCCCCTCGACCCCCTCCTCACGGAAGCCAACATGATGCCAGCGATACCACTCGTGAATTATCGCCGAACCTGATACGCCCAGCAC…
623	961	213783	216257	2475	C	LINE/Tad1	GCCGGAGACCTCCTCATGGATGTCAAAGGACCTTTTCACCACGTATCGAAAACCCAATTAACCAAACGGATAGACGAACTGGAACAGACCCACATATCATACAGTGGACAAACAGCTAGATGACTGACCGAAAAGCCTCACTAGTCATAAATCGACATGAGAGCACCATGAAGGAAACCAAAACCGGAATCCTGCAAGGATCACCAGTATCCACCATTCTCTTCGCAATCCACATCGCAGGCATCTTCCAGGAAATTGAACAAGAAGTGATGGGAGCAAAGGGACTGTCATTCCTAGATGACATCTCCTGGTTGGTATCGGGAACAGACATAACAGAAATCACAAAACTACTGGAAGCATGTGGAAAGGCAGCAAAACCCTGGGCAGACAGAAACATGA…
624	961	216268	216851	584	C	LINE/Tad1	ACCAAGGAGAGGCAGGGTGTGAACATCCCAACACTCCAGGATAAAAACAACAATCTGGCTACAACCATAGAGGAAAAAGAGCCGCTGCTGAAGAGAACCACCTTCCCCACCCCACCAACAGGAGAACAAAGAGAACTGGCCCCAGCATCAACAGGAAAAGTCTTCGAATTGATAATGGAAGCAATGATATCCAAGGCAATACACCAGCAGGCAGGGGGGAAGGTGCCAGACCAGACCTCTTGAACTTCAAGGTGATCAGACTACTATAGAACTGGGACAAGCAAAGAATAATCAACATCACCAAACAATGTGTCCGATTGGGATACCACCCAAAGCCATGGAATGTGGCCAGCGGAATAGTGATAAGAAAAATCAACAAACCTGACTACACCCAGCCAA…
625	962	3571	3838	268	+	LINE/Tad1	GCTACCTTCAACAGCCACTGCCCCACCAAGGCATCCACCTTGAGTGAAGCATGGCAGCATACCAGACCTGCTCCCCACTCAACAATGCCTGCCCCCACTGACACCTCCATGAGCACTAATGCATAGTTACCACCCTACTGCAGCTCACATCTGCATCACATCCCACAATGTGAACCAAAGGACAAGGCCCCTCAACACCCTGCTAAACATGGCAGGTAAAAAAAATGACATAATCCTGGTCCATGAAGTAAACATCAAGGACCCCAAG
626	965	48	2464	2417	+	LINE/Tad1	AGCCGCCCCGTCACAGCAAGCGCCTGACGCATCCGATGCGGAAATGTATGTAGACACGTGCTCTGACATCAGCGAGGACTTTAGCGATGACGACGCGTCTTCCTGCGCAGACTCCCCCATGCCTGCCACCCGCAACAATGCCAACACCACTCCCAAGACCCCCCATATGAAGAAAATCCTACCTGACATGAACTGCAACACCCCCAACTGTATCACCAACAACGACCCCCATTATACCGTCCACAACACTGCCGGCAAAAATAACAAATGCCAAGCTGCCTCCTCCGCCCACTCCATGACACACAGCACCACCAATTCCACTCCTGTTCCATCCGGAGTCAAACACATCCACCGCATTGCTGACACCTCCCCCATCGACTATTCCCCCTTGACCCTCGA…
627	965	2465	3360	896	+	LINE/Tad1	CCTGGCTTCCCCATCGATGGCAAGGGAAATAACAAACTGGGCCATTGACAATGGAATAGCCACAGGTTCAGACCATGAGGTCATCTGGTTTCAACTAAACTCTCTACATCCAGACCACCCGGCCACCCCCCTTGCAACTACTTGTCTAAACTGGAACAAAACAGACTGGCATACATTTACCAAGGAGCTCCAGCTCCTCACAGAGGCTAGCCACCCATACTGGACACAGCTCTGTGCCAACCCCTCTGCAAGCAACCTCGACAAGTGGGCTGCCCTACTCCGCAACTCCATACAGAGTGCAGCGTCCAAGGCCACCCCGACCCTATCACCCACCCCATGCTCGAAATGGTGGTGGACTAATGAAATCTGCCACACCCGCCATGAAATGACAACTGCCAG…
628	968	3268	3668	401	C	LINE/Tad1	AAGAGACACAGGGGACAAGGGGAAGAAGGAGAGGGAGTCATGGAGGTGAGGGATGAAGGGAGAAGTGCAGGAGTAGAAGGAGTAGCGGAGAAGTGAGAGAGAACAGGCAGGGGGGGCGGTGGCCTGGCAGAGTTATCTTTTTCTTTTCTTTTCTGTTATGTCTTGGTTTGTGGTGGAAATACAGGTGGGAAAATGGCTAAAAATGGGCGGGGAAGGGTGGAGGATGGGGGGGAACAACCCGGCGTGGTGGCCCCTGAGCGCACAGGGCTCCTGGAACTGATGACACAAGATGGATTAAGACTCAACAAGAGGGGAGACTACACTCCCAAACCCTCATAACAGCTCTGGGGCTTACCCAGTGGGGACCTGGCATCATGCCCAGGTCCTTAACATTGTATT…
629	968	3973	6597	2625	C	LINE/Tad1	GACACCATCACATTCACATGCCTTAGAAAAGCATACGATGCGATCCCCTACACATTCAACGTGCTATACTCGGCGCTCGGCGAGAAAGGATACCACCCAAACTGCTGGCGAGAAGCTACCATGGTGATCATCCCAAAGCCAAATAATTCCGACTATAGCGCGGTGAAGGCATACTGACTGATCGCATTGCTTAACTGCATGGGAAAGGTTTTTGAAACATTGATGGCGACACGACTCAGCCTTATGGCGGAGTCACATGACATCCTGCATGCAGATCAAATAGGCGGGTGCCCTAAACGTTCGGCTATCGACGCTGCGATTGCACTAATGCACGAAGTCGAAGCGAACGCTAGCCATTGCCTAGTCTCTTCTGCACTATTCTTAGACCTACAAGGCCCG…
630	973	3801	4188	388	C	LINE/Tad1	GGACAGAGGAAAAAGAGACTGAAGAGGGGCAAGGCAGGGAGATGAGGAGCAGGGAGTGGCAAGTAAGAGTGGCCAGAAGGGCACTGAAATGGGAGAGAAGGGAGGAGGGGAGGGGCGCAGGTGGCTGGGAGGGGTTATCTCATTCTTGTTGTTTGGGAGGAAATAAAGGCGGAAAAATGGTTAAAAAAGGAAGGGGAAGGGTGGAGGAAATGGGGGAACAACCCAGCGTGGTGGCCTCCGAGCGCACAGGGCTCCTGGAACAGATGATGCGAGATGGATTATGAACCAAACGAGACTTGGGGGACTACAACCCCACACATGAAGACTGCTCTGGGGCATGTCCCAGTGGGGACCTGGGGTAACAGCCAGGCCCTCAAGTATGTATTTA
631	977	11589	12251	663	+	LINE/Tad1	CGCACTGGCCATGGCCACTTCGCAACATACCTTCAGAGAATTGGATTCCGAAACTCGGATAGGTGCATAACCTGCCCATCAGGACCTCGGGAGACACCCCAACACCTCCTCTTCCACTGCCTATGGTACGCAAAGGCCCGCCTCATCGCAGCGAAGAAATACCGCATTCCACTGCACACCAAGGCCTTCCTCTACCGAGACATGGCACACAAAGCTCTCGCGGAGCTTGTCCGCGACACTAGAATCGGCACACGTATAGAACGAGCAAATAAGGAAGAAGAAAGGGCCGAAGCGTTAGGAGAGAGGGAGGGTGCAGTGGAGAATGACGTGAATGAAGATGACGGAGACGTGGAAGAATGGGACGAGGAGGATGAAGAACTGGTCGGCATGGTGCAGATG…
632	980	1290	1985	696	+	LINE/Tad1	CTGCACTGGGTGCCCGGCCACACAAACATCACTGGAAACGATGAAGCCAATCACCTGGTGAAAATGGCAATGACCCTACCACCCTCCGTACCACTCCCGATCTCCCAGTCGTGGCTTTGCAGACAGGTCCACGAACAATACATCACTGACTGGCTCTCCTGGTTCAACTCTGAACTAAAACCAAAAACCTACGATGCCCCACACAAATGCAACCTCGACTCTGCCTACACCACCCTACCATGGGAACACTCTACGGCTATCCTAGGCCTCCATACGGGACATGGCTACTTTCTGGACTGCCTCGCTCACCCCCCCACAGCCCAATACCCTAACTGCAATTGCCCCTGCCCACTCCATCCCCCACAAACCCTGAAGCACCTTCTCCTCTCATGCCCAACA…
633	980	2265	2649	385	+	LINE/Tad1	AGAGGAAAAGGGGACCAGAGAGAGACAAGGAGGGGAGACGGAGGGCAGGGAGTGGGAAGTGAGAGTAGCCAGGAGGGCACGGAGAAGGGGAGAGAGGGGAGGAGGTGAGGGGTGCAGGTGGCCCAAAGGTGTTATCTGATTTCTTTTGTTTGGGAGGAAATAAAGGTAGAAAAATGGTTAAAAATGAAATGGGAGGGGTGGAGGAAATGGGGGAACGACCTGGCAAGGTGGCCTCCCAGTGCACAGGGCTCCTGGAACAGATGACTATAGATGGATTGTGAACCAAATGAGTCTTGGGGGACTACAACCCCACACATGAAGACTGCTCTGGGGCATATCGCAGTGAGGACCTGGGTTAACAGCCAGGCCCTCAAGTATGTATTTA
634	984	10538	11016	479	C	LINE/Tad1	AACAAATAGACTGGCAACCAGATACTTGCAGTTGAAGATCGGACATGCCGTGATCGGCACACACCTCAAGCGAATAAAAACCATCGAAGATGACAGATGCTGGTGGGGTCACTCCGGGGAACGACAGTCGGTACAACATCTGGTGAGAGAATGCCGACAATGGACAGAAGCCAGAGAAAGGCTAAAGAAATCGGTTAAAAGACACCTATGGCAACACTACAATACGAAGCACCTGTTCGCAGATAGAGAATGCACGAAGCCAATCCTGACATTCCTGGAAGAAACGGAAGTAGGAAATAGAACAAGTGAAAAGGAGATGGAAGAGAGAGAAGAAGAAAGGGATGGAATGCTAGGATGGGAAGAAATGCAAAGGGAACCTGAGGAACGAAAAGAAGAAGA…
635	987	739	1125	387	+	LINE/Tad1	GGCCTTCTTATACAGCGACACATCCCATGAGGCGTTAGCAGGCCTGATACGACACACCAAAATCGGCACCAGGTTAGAAAGACAAGAAAAGGAGGCGGAGACGGCGGGAGCGGCGATTGCTGAGGACGCAGAGGAAGTGGACTCGGAGGATGAAGAAGGCGAAGAAGATGACGTAGAACATGAGCGGAGAGAGGCAGCGCTGGCGGAAGCAATGACGTGGCCGGCTGAGCAGTTCGGGGACGAGTTGGCGTAGAGACTGGAGTTGTATTTTCTTATTTTCTTTCTTATTTCGTTTATATTTTCACTTGGTTACGGATAGAATAGGGGAGCGACGGGGGCAGGGGATCACATTAGAACTTAGACGCATTAGATGATGTAAAGCACGTT
636	987	114666	114918	253	C	LINE/Tad1	CATGGCGTACGTTGTAGGCTTTGGCCAGATTACCGGGGGTGTCTCCTTTGCTTATTATTTTCATTAGGCGGTATGGAAGTAGGACACGGGGGTGCCACAGTTGAGGTCTTTATTATTATTATTCAGACGGTGGACAGGAAATTAGGGGGGACGCATGTAAGGCCCCTACGGGGCGGGCCCTTCGGGCAAGCGGCGCCATATTCTAGCTAGAATACATGCACCGCTATAGCAAATACACTGATTCAAAACAAAA
637	987	203115	204940	1826	+	LINE/Tad1	AATAGCATCGGCGCAGAGTTTGCGGTTGGTTGTAATGCGTGTGTTACAACATAACTGCAGGCAGATGCCAGAAGTGGTGCAAGCCCTTTTGGTAATGGTGACGGACATGAAGTATGATGTGGTGTTAATTCAAGAACCCCCAGTGGGCAAAAGAGGAAAGATAACATCACGAATGTTCAAGATATATAAACCAGAAAAACATAAAGATATGACAAAAGAAACGCAAGAGCATGGGTTGCAATAAACAAAAGAAAAGAAAGAAATAAATATATAGTGGAAGAAAGGATGGACCTGAGCACAAGCCCCGATATCCAAGTGTTCAATTTCTATCAAAAGAAGTGGAAAGAGGATGTAATGGAAGGCGAGCAGGCATGGGAAAAAGGATTGCAGATGAGACTG…
638	987	204945	207433	2489	+	LINE/Tad1	TCGCCGGAGACTTACTCATGGATGTCAAAGGAGCATTCGATCACGTTTCAAAAACACGATTGACAAAAAGAATGGAAGAGCTGGAGCCAGACCTGCAGATAATTCAATGGACAAATTGTTTCATGTGAGATCGGAAAGTGTCCTTGGTAATCAATGGACATGAAAGCGCCATGACAGAGACAACAACCGGAATACCTCAAGGCTCACCGGTATCACCCATCCTCTTCGCAATCCACCTATTTGGAATTTTCGAAGAGATAGAAAAGGAAGTCCTCGGATCCACCAGACTGTCATTCGTGGATGACATATTATGGCTGGTTGTAGGCAAAGACGTAACAGAGATAACGAAAATCCTGACACAATGCGCAAAAGCCGCAAAAGCTTGGGCAAACAAGAATG…
639	987	210442	210680	239	C	LINE/Tad1	ACACTGGGAATGATCTGTGAGCATTTAGTACTGAATTACAGCAACTGTGGAGGACCTAACGTGGCATGGAATAAAAGACAATGCAAAATCAGACGGGTAGCTTTCACAGAGTTACACAAAAAGAGAGAAGAGCAGGCAGGAAAGGCAAATGCCACGGTAAGTGAAAACCTACTAAACTTTGAGCTACCCCTCCCATCATCATCTAATGTCACCCGCACGGATCCCACTTAAGATGGTGA
640	987	212602	212845	244	C	LINE/Tad1	CTCCTCCTCCACTTTTTAAAAGCATCAAGCACAAAACATCTGTTGAGACCCCAAAAACAGACGTCCTCCCACCTAATAATGACGGAGGATGCATCCAATCATCCAGAAGACGAAGGAGGCAAAAAAGGCCCTGGATCTGGACTCAAATACCGCGGATATCGTGAGAAACCACAAGAGGAAACCGTCTCGGATTTCTCCAACCTCACCGACTTCAAAGACAATAATGAAGAAAAAGAAGACGCAA
641	990	35	1075	1041	C	LINE/Tad1	CTGCCCCGGCGGTAGCCAAGGAAGTGTCAAACTGGGCCGTTGACAAGGAGAACCCAACCGGCTCTGACCATGAGGTAGATACCTTCCAGATTACCTCCCTACACCCAGATGCAGAATACACGTACCCAGAACCCTGCCTCAACTGGTGCAAAACAGACTGGGACAAGTTCACCTCCATGCTCCAACACCTCTCCACCGAAAAACACCCCCTGTGGAGCTCCCTCTGCTCAAACCCTTCCCCACAGAACCTTGACGAATTGGTGACCTTGCTCCACGACATCATGCTCTCCGTGGCCACTACTTCCACCCCTCTGCTCCTCCTATCTCCCAGATCCAAATGCTGGTGGATGGCTGAGATAGAGCAAACTCGTAAGGGCATGTACCATGCTCACCGGACAT…
642	990	1082	2660	1579	C	LINE/Tad1	CCTCCACCCTCCTCGTCCCCAACCTCCCTCCTGCCACTCACACCCCCTCCGTGAAAATGAAGGCCAAAACCCCCACCCCGAACCGCAAACCTCCCTGCACCCAGGACATCGTCGTACCATGCTCAGACCCCTGCGCTCTCCCCAACAGCGCTAAAGTTGCAATCAGCCTGTCAGTCAATGCTGCTCCCCAGAAGGCCAATGCCCCAGCCACAGTCACGATCACGATGGTTCACAAGAACATGGTGGGCAACCTCCTCCTCACCCCGTCCGCCCAGACCCTCGCCATCAACATCATGACCCACCTCCCAGTCATCAAGGAAGCTGCCATGGCAGTCCACCCATCCCTCTTGCCCCCACGCCTCAACGAGAATCGGCATAAACTGGCCGTACATGGGATCC…
643	990	5170	5557	388	C	LINE/Tad1	CCTGCACCTGCTCAACCCTGGAAAGGCACCCCTGCCTCGAAGGCTTTATTCACCGCAGCCCCCAAGCCGAAACAACAGGCCCCAAAAAACCCCCCAAAGAAAACCCCCCACCACCAGGAGCTGGTGATCCCCTCTGCTGACCCGCAAGCCCACCCAGACAGCGCTAAGGCTGCCATCAGAGAGGCCATCAACAAACCTCTAAGAGCAGCTGATGCCCCTGCCAATGTAGGTGTCCTCATGGTGAGAAAGAACATGTTAGGAAACATCCTGCTCACTCTTTGCCCTGACACCCCCCTCCCCAAACTGCTTATCCGCCTTCCCCTCATCCAAAAAACAGTCGAGAACATTCACCCCTCCCTGATGGCTCTCAGAATTACCGAGCAATGGT
644	990	5851	6108	258	C	LINE/Tad1	TTTGTTTGTTTGCTTTTGCTCTGTGGAGGAAATAAAGGTGGAAAAACGGTTAAACATGGGAGGGGAAGGGTGGAGGAAATGGGGGAACGACCCCACGAGGTGGCCTCTGAGCGTACAGGGCTCCTGGAACAGATGACACTTGATGAACAACAGCACAACGAGACTTAGGGGTCTACAACCACACACCCTAAAGATGAGCTCTGGGGCCTACCCAGTGAGAGCCTGATGTAACACTCAGGTTTCTTAATTTTGTATTTA
645	990	6505	7800	1296	C	LINE/Tad1	TGCCTCATTCATATGCTCTGCTCCATTGGTCAGTGGATATTACCAGATGATGAAATCGAGGACATGGCATACCCAAATCCCACCCTGTGGAAAAACTCACCCTTAAGAACAAAGACATCCTCCCTCCCCAAACCCGAAGCTGCCATCGAACACCTCTCACTGATCTGTGACCTGAGTAATGACAAAACAAACATTATCACCTATACAGACAGCTCCCAACTCGAAGGCAAAATGGGTGCCACATACTGTATCACCTCAGGTTTCCCCAATCAAGTCAATGAAACCATCCCCATGGGCATGACCACAGAAGTGTTCGATGCTGAGCTATGAGCAATCCACAACTGCCTTGAGATGTGCCACGAAATCATCTCCCAGCACCACCTCCAATGCTGCCGGATA…
646	990	8016	9036	1021	+	LINE/Tad1	TATCACTCGACTACCGCCTCCCCCTGCACTCTCAATAACCACCTGGCAATCGCCAGATTTTCGAGCGGATTATTGTTCAGCGCCCCCAATTTACCTTTCCACAACATTTTCAGTCCAGGCCATCTCTTTTTCAACATGTTACACGGTGAAAAGGAGATCTCCGGGCCCCTGAAAAAGTCCAGCGGCATGGTCATCAAAACCCCCCCCCACAACCACCAAAAATCATCGATTTTCCGGCGGAATCCTTGTCGCACCCGCAAACACTACCTATCCCGACATTCCGATGCCTCCCCACTGCTCCGTTGAGGAGAAACACCCTCTCCCTCCCGACAAACCGCCCACACGCGACCTCGCTACCAGCGAACACGCTAATGCAGAGCCGCAAGACATGCATGCACG…
647	992	7808	9103	1296	C	LINE/Tad1	GATGGGTCCAGAGTGGATTCTGGATACACAGGATGCTCCGTTGTGTTGAGGCAAACCAACAGAGAATGGCGCAAAAAATGCTACAACCTGGGAAAGAGACAGGAAACAAATGATGCCGAACTTTACGCCATAGCGGAGGCAGTCTCCCTGGCCTACAGGAGAAATATACGAACACCAGACGACGTCGAGACTATACACATCTACTCGGACTCAACAGCACCCTCAAAACGCCTAAAAGACCCAACCCCTGCTCCCGGCCAATGGCTGATCAAAAAGATTGCGGAGACGGAAACAATGATTGAGGATCTGGGGCACAGAGTCGAATACCATTGGATCCCCGGCCACATGGATATAAAAGGAAACGAATAGCCGACAAAGCTGCCAGAGAGGCAGCTGCAC…
648	992	9762	10623	862	C	LINE/Tad1	ATGGCTAGAGGAGACCTTAACCAAAGTGTTAGATAAATTTGGACCTGTATCAAGAGTGTATAGCAAGTCAAAACCATGGGGCAATGAGCATGTATGAGAGGCAAGAAAGGTGGCAGGCAGAGTAAGGAGGCAGCAAGGAAGAGTGGTAACAACAGATAAGGAGGCAAAGAAAAAAGACAAGGAACTGTATAGGATGATATGGAGGAGCCAAGGGTAGATGTGGAATTGGTGGCTGCAGAAGGTGGATTACAAGGAGGTATACAAGGTGATAAACTATATGAAGGACAGACTGGGAGCCAAGATCCCAACTCTATGTGATGAAAACATGAACCTTGCCATAACTATCAAGGAAAAAGAACCCCTGTTAAAAAAAATCGCATTCACCACCCCACTGAAAGA…
649	995	1480	1788	309	+	LINE/Tad1	GGAAATCGCCAGATCTTCGAGCGGATTATTGTTTGGCACCCTCAACCTACCTTTTCGCAGCATTTTCAGACCAGGCCCTCTCTTTTTCGTCATGCTACATGGTGAAAAAGACATCCCCAGGCCCCTGAAGAAGCCCTGTGCAACAGTCATCAACACCATGACCCACAATCACCAAAAACTATCAATTTTCCAGTGGAATCCCCATCATGCCCGCGCAAGCTACCTATTCTGAAAATCTGATGCCTCCTTGTGCCTCCACTGTGGAGAAACAACCTCTCCCCCCTGAGAAACCTCCCATACACGAATTCG
650	997	245776	246008	233	C	LINE/Tad1	AAGGATGCTGAATAAAGGAAAACGAAGAAGTGCGACAGTGTACGGCGAGGTGAAGCTAAAACCTGTAAAATCCGGAGGATAACTAAGTTAATCTGAAAGAGGCACGAAGAGATAGAAAGGCGAATGTAAAAGAGAATAGAGAAGAAAAGAGGAAGACTGAAGATGGAAAACAACAAGAGAAAATTCAGATTAGCATACCCCGTGCCGGGGTCAAATAAAATGACAAAATCAAA
651	998	54	1432	1379	+	LINE/Tad1	CCACTTACCCCGCCACCCCCCACAACAGAAAATCATCCTCAACCACAATGCCGTATTCTCCCCGAACCACCTCAGCAGGTCCACCCCCGAACACACCATTAAATCCCCCTCCAGTAGGACGAAGAACATCTCCAATGGCCTCCTCAAGAAGCACCACGCCATGTCGAGCCACCACTCTGTCCACACCAGCCCTAACTCTACTCCTGTTCCCACCAGCATCAAGCGCCCCCACACCAAGTACACTGCCATTGCCACAAAGCCAACCACCATCGAAGACATAGCATTGACCATTGAACTGTTAAGCAACAACCTCAGCACCACTACAGACATATTCTGCCAGTCTGAAAAAGCTACCAATGACAGAGTAACCAAGGTCTATCAGGTAATGGACAAGGACCA…
652	998	1506	1886	381	C	LINE/Tad1	AGAGGAAAAAGGGACTGAAGCGGGGCAAGGCAGGGAGATGGGGAGCAGGGAGTGGCAAGAAAGAGTGGCCAGAAGGGCACTGAAAGGGGAGAGAAGGGAGGAGGGGAGGGGCGCAGGTGGCCGGGAGGGGTTATCTCATTCTTGTTGTTTGGGAGGAAATAAAGGTGGAAGAATGGTTAAGAAAGGAAGGGGAAGGGTGGAGGAAATGGGGGAACGACCTGGCGAGGTGGCCTCTGAGCACACAGGGCTCCTGGAACAGATGATGCGAGATGGATTATGAACCAAACAAGACTTGGGGGACAACAACCCCACACATGAAGACTGCTCTGGGGCACATCCCAGTGGGGACCTGGGGTAACAGCCAGGCCATGAAGTATGTAT
653	1000	70	2436	2367	C	LINE/Tad1	CACCACACAGCAACTGCTGACCCCCCCTGCATTTTTCAACAACAACCTCAAAATTCCCGGTGCTGCTGATGGAAATCGCCTTAGCGCACACTGTTTACCCCAAATCCCGAATTCCAGGCCTGAATTCCTGTTTACCATTGAGTTTCAGCGGAAAAATGCGATTCCGGGACCTCTGGACCGGTCAATGGGCCTTTCCATCAATGCCGCCCCACATCCTGCCCTCCGGTCATCAAACAAACCTTATTTTCGGTTTTGGCATACCGAAATCTCCCCCCCCCCAAATTCCCCTATAGCCAGCAGCACTGGTTGTGGTGAACCCCCCAATTTCCCTCCTTTCAGACCCCCTTTCTTCGCAAAAATTTTTTCTCGCTTAACAAGAGCATCGTCACGTGATCCTTC…
654	1000	2443	3021	579	C	LINE/Tad1	GGTGTCAAAAGTTTGGACACCACCATGCTACTTGCACAGCAGAAAGCGGACCCACCTGTGCGATCTGTGCAGCCATCCACCCCACCGAATACCACCAATGTGCTGAATGCCCCAGCAAGAGAGGCTGATACTGCCTGCACACCAAGTATAAGTGTGCGAACTGTGTTGACGTCGGACACACTGACACTGAGCACACCGCATACAACACCAGGTGCCCTGTGAAGATGGCGGCAGTATGAGAAGCTTGGCAGAAAACACAACCCGAGCCAACCACCACTGATGACATTCCCACTGAAATCAACACCATCGCTGATACCACCATGACCACTGATGAATATGTAAAATTCATCATCAGCAACCCTCTGCATCATGTCTCACAACACAAACCGCAGAACGACC…
655	1000	3273	4267	995	+	LINE/Tad1	GAAACTCTAACAAACTCACTAACGACAGAGACACCAAGGCCTTCCAGGTTATGGATAAGGTCCATTCTACACTCCAGGCCATTCACGATCTCCTCAAACGCCTGGCCCCCACCCTCCTCCTGACTGCAGACCTCTCGTCACCCCCCCCCCTCTCCAGCACCATGCCCTTTGCCCCGGTCTCTGCCCCTGCCCCGACCCCCCCTACCCCCTCCCCAGCTGATTACTGGAAGAAAGGCTGCCTGGCAGCCAAAGCCGAACTCAGAAAGCACAATCTCGCCACCCCAGACCACTCTTCAGTCCCCACCCCCCACCCCACTGCCCCCTGGACCGGCCCTTCCGCCTCCACTACACTCTTCCCCAAGATAGCCCCCACCCCTCCCAAGGTACCCTCAAAAACCC…
656	1003	18259	18817	559	+	LINE/Tad1	CCCCAGCACCTGGTTTTTCACTGCCCCCGATACTCGGCAGCCCGTGCCGAGGCCTCCCGACGATGCCGAATACCATTCCATACGCGCGCCTTCCTGTACACCGATATTCCTCATAAAGAACTCACGAGCTTGATTCGCGATACTCGAATAGGCACCAGACATGAACGCCAGGAGAAGGAGGCAGAGCTAGCGGGCGCGGCGTTGTTAGAGGATAACATGGAGGAGGAGTCGGAAGACGAGGGAGGAGAGGATGAGGATGCTATAGACTTAGACGAGAACGATGACATAGGCCTGGCATGGCTAGAGGCGAATATAGACAAGATAGTAGGGCGGCGTCCTGTAAATTAGTAAATAATGGCGGTTATGGCGGATAGAGGCGGTTCGGCGGTTGTTTATTGT…
657	1003	36612	37059	448	C	LINE/Tad1	GTCGCATCTCGCTACATACCAAAGCTTTTCTCTATAGAGACATAGCATACGAAGCTCTTGCGGAGATCATCCGCGATACCAGGCTTGACACTCGTATTGAGGGAGCCTCCAAGGAAGAAGACACGGGGAAGTAGAAGGAGGCGCGCTTGGAGAAGACGGGGATGATTTGGAAGAGGATGACGAAGAGGAATGGGAAGAAGATGAAGAATTAGTGGGTAGAGAGGCGGTAGAGCCGGTATTACCGGAGGAGGCGTTAGAGGCGGCGGGACGTTGGTTGTACGATGAATTTGGGGACGCAGAAGGGGACGTATAGAGAAGGTTGCATTTAGAGGGCTTAGAAGACGGTTAAGATTTGTATAAAACACTATATTAGATTTCGGTAAAGCACACTGGCAAAAT…
658	1003	117953	118595	643	+	LINE/Tad1	AGGACCAACAAGAGCAAAGCGTACATTCCGCGGGAGAAGACAGGAATAAGGAAACAACTGAAACACGAGAAGAAGGAGGTGGCCTCCCGGTTTTACTAGCTCCTCACAGGACACGCGGTGATTGCTCCCTACCTCAAGGAGAAACTGAAGAAGACAGACTCGGATGTCTGTTAGTGGTGTGAGTCGGGTAGGAGGTAGACCCGGAACCACCTGTTTAAAGAGTGTGTAAGGTGGAGCGCAGAGATAAAGGACGTATGAAGGAGGGTTGGGAAAGACGTCGTTTGGAGACGGGTAAAGTGGAAGCCAGTGTCGAAGCTGTTCAGAGAGGAGAGAGCAGAAGGTGCAATATTAGAGTTCATCAGGAGGACAGGAGTGTGCAAGAAGAATGGCGCGAGGGGG…
659	1003	173922	174210	289	+	LINE/Tad1	GAGGATGAGGATGATGAGGCTTTTGACGTGGTGGAGACGGAGTGAACTGACGAAGCGATGGTGGACGCTGATGATTGGCTGCATCGAGAGTTTTGGGAGCGAGTAGAGGCAGAATTAGGGGATGAGAATGGGGACGTATAGAGGCATTAAGTGGGGAAAGTTGGAAATTAGGCAAGCTGAGACGCAGCAGGATATTACGATTGTACAAAACATGCTGGAAAAAGGAATTTCTAGACTGTATTTTAAGGCGAAATCCATAGGATAGCCGGAATAGACTTATTAAAAAAAA
660	1004	16837	17155	319	C	LINE/Tad1	TATGCACTGCCATCCTTGGCCTTCGCACAGGATACAGCTACTTCTTGGATTACCTCACCCACCCTCCCATAGACACATACCCATCCCAGAGCTGCCGCTGCCCATTACACCCTCCCCAAAACCGCACCATCTCTTCCTCAGCTGCCCAGACTTCCAGCATGCACCAACAACCCTCTGGAAAAACCTTTATCTCCACAGGAATGCTCACCTCAACATCACCAACATCTTGCACACCCCCTCTGGCACCAAGGCTGTCTCTTCTTTTATCTCTGCAACCAAGGTCACAACCTCAGTCTGGGTGCACACCAGGTTAGGAAGG
661	1007	39	1074	1036	+	LINE/Tad1	GACAACACCATGCAAATCGAATGGACAGCAACCTCCAACAACAAGCCAAGCACCAGCAATATGAATGGAAGTGTGCAATCCAATTCACAAAAGAACAGTACTGGGTAACCTGACTACAGAACACCAACTTGACTGACATCTGGCACTGCCTCTGCACTGCTGACACACACAACAAACCCCTACCCACACTGGAAGGAAAGGAAGCATTTCCAGACAAATGTAAAGTACTATGGAACACTCTCTTCATACCACAAACAACTAACCCAGTGCCACTCCCCCCCAACTTTGTCAAATGCCACATACACACACCAGAAGATTACCACCCAGTCCAGAATGAGGAAGTCAACAAAGTCATACATGACCTGAAATATGTGACAGCCCCTGGACATGGTAACATCA…
662	1008	1	654	654	C	LINE/Tad1	CCAGCAGTAGCAAGGGAAGTGACAAATTGGGCCGTCGATGAGGACAATGCCACCGGCTCCGACCATGAAGTCGTATGCTTCCAGGTAGACACCTTACACCCTGACCTAGACCTGACCTCACCCCAGCCATGCCTCAATTGGCGAAAAACCGATTGGGCCACCTTCACCACGACCATCCAACACCTCTCCAACACCTCCTGCTCCCCCTGGGTCCACCTCCGCCAACACCCCTCCCCAGCGAACCTTGATGAATGGGCAAATCTGCTGTGTGAAGCCATAAAAACCGCCGCCAAGAAATCCACCACCCTGCTGACCCCCACCCCTCTCTCAAAAAGATGGTGGACCACGGAGCTCAAACAAACTCGGAGCGATATGTCCCATGCCTGGAGACAATGGAAA…
663	1008	665	2255	1591	C	LINE/Tad1	CCCTGGACTGGAACCCCGTCCACCACTGCCCTCTTCCCCAATGCACCCCTCACCCCGCCCAAACACACCCTGAAGACCCCTGCCCCCAAGTAGACCCTCGCACCCAAGAAAACTCCTGCCCGCTCCCAGGACATTGTCATCCCATGCCCCGACCCCCGTGCACTTCTGTACAATGCAAAGACCCAAATTGGACTGGCATGAATGCTGCCCTATGTAAGGCAAACATTCCCACCAACATCGCTATCATGATGGTTTGTAAGAACATCTCTGGTAATCTCCTCCTAACCCTGTCCCCTGATACCCCTGTCTTCGACCTTCTTCCCCATCTCCCCCTCATCCACGAAGCTGCCCGTTCCATGCACCCCTCCCTCCTAACCACCAGGATGAATGAAAAATGGC…
664	1009	490	1355	866	+	LINE/Tad1	CACCACACAGCAACCGCTGCCCCCCCCTGCATTTTTCAACAACAACATCAAATTTCCCGGCGCTGCCGACAGAAATTGCCTTAGCGCACACTGTTTACCCCGAATCCCGAATTCCAGGCCCGAATTCCTGTTTACCATTCAGTTTCAGCGGAAAAACGCGATTCCGGGACCTCCGGACCGGTGAACGGGCCTTTCCATCAACGCCGCCCCACATCCCGCCCTCCGGTCATCAAACAAACCTTATTTTCGGTTTCGGCATCCCGAAATCCCCCCCCCCCAAATTCCCCTATCGCCAGCAGCACTGGTTGTGGTGAACCCCCAAATTTCCCTCCTTTCGGACCCCCTTTCTTTGCGAAAATGTTTTCTTGCTTAACAAGAGCCTCATCACGTGATCCTTCA…
665	1011	1292	3172	1881	+	LINE/Tad1	AAAGTTCACTGGAATAAAGAAGCCACAAGATGGCTGGGTGTTGATCTGGATCACTCGCTAACTTTTGCCATGCACTGGCTCAAGGTCATCTCGAATGGTAAGTCGGCTGAGGGATGACTGCACAGCTTAATCACTATGTTTGGCATCCCCTCAGTGAGTGCTAGCAGCTTCCAGATTGCTGCAGTGCAATGGACCTTGTTATACAATGCAGAGCTATGGTGGCACATGAATTCTTAAACCACGAGACTTTTCCAGTTAGCAATTAACAACCTCGGAAGAGGCACTTCAGGCTGCTTCCATTCGACTCCCCTTGGCCCCCTCCTCAGGGAAGCCGATATGACTCCAGCGATCCTTCTCCTCAATCATGGCCAGACTTGGTACGCCAATCGCCTCCTCTGA…
666	1011	41764	42497	734	C	LINE/Tad1	AATGACCGCAAACAAAAGGCTAGTGACAAGGTACTACCAGATCAAAATAGGACACGCCATAATTGGAACACACCTCAAACGCATCAAATCCATGGAAGACAACAGGTGTTGGTGGTGTCACTCCGGGGAACGACAAACGGTAAAACACCTAATGAAAGAATGCCGACAATGGAGAAAGGCCAGAAAAACAGTAAAAAAGACGGTCAAAAGACATCTACGGCAACACTACGACCTGAAACACCTCTTCGCAGATAGACACTCCACAAACCCGATGCTGAAATACCTCGAAGAGACAGAAGTAGGCAACCGAACATCAGAAAGAGAAATGGAAAATAGAGAAGAAGAAGAGCGGGACGAGAATGTAGGATGGAATGAGATGATAAGGGAACGGAAGAGAGA…
667	1011	60252	60639	388	+	LINE/Tad1	GACACCCCATCACCTCCTTTACTTCTGCCCGAAATACTCCAAAGATCGCCAGGCAGCCGCCAAATCCAGTCGCATACCCCTCCACACAACGGCATTTTTATACCGCGACATCTCCCAGAAAGCACTGGCAGAATTACTGCGCAACAGGAGGATAGGAACGCGAATGGACAGGGCGGGAATGGAAGAAGAACGGCGGGGGCGGGACGGCTTCGATGGGCGGGTGGATGGCCAATGGGACGGCGAGGAGGATGATGACGAAGGAGATGAGGATGAGGATTACGATGAGGGTTTTGACGTAGTGGAAACTGAGTTGTCTGACGAAGCGATGGCGGATGCTGGCGATTGGTTGCACGGGGAGTCTTGGGAGCGAGTAGAGGCGGAATTAGGG
668	1018	6494	6726	233	C	LINE/Tad1	GGAGGAAATAAAGGTGGAAAAATGGCTTAAAAATGGGAGAGGAAGGGTGGAGGAAATGGGGGATCGACCCGGCAAGGTGGCCTCCGAGCGCACATGGCTCCTTGGATCTGATGACGCTAGATGAAAAACTGCATGGTGAGACTTGGGAGACTACACTCCCACCCACATTGACAGCTCTGGGGCTTACCCAGTGGGGACCTGGCATCACCCCCAGGTTCTCATCATTGTATTTA
669	1030	40	1390	1351	+	LINE/Tad1	ATCTCCACGGACAACCACTCTGCAATCCTCGATGCCTCCCGATCCAACAAGGGCCCCGGACAAGAAACCGCCCTCCTCATCCACCAGACAATCCACGACCTCCAAGACCTCGCGGTCCAAGTAACGCTACACTGGGTCCCCGGCCACAATGACATCGACGGCAACGAGGAAGCCGAACACCTAGCAAAATTGGCGGCATCCCAAGAACCCACCATCTCCCCCCCAGTATCCATCTCCTGCCTCCATCATCGGGTCAAAGAACAACAAACCACAGATTGGACAACATGGTACGACGCCTCGCCAAAACACAAGACGTACTGCATCCCTCACCGATGGTGCTTGGACACTGCATATACCTCCCTACCCTGCCGACAATCCGCCACAATCCTCGGCCTCCAA…
670	1030	1695	2955	1261	+	LINE/Tad1	CCCCCCTGCCTTTTCAACAACCAGGCTGAAATCAGAATATTTTATCACGGATTACTGTTCGGCAGCCCCGAATTACCTATTCGCAGCATTTCCAGACCAGGCTTTCTCTTTTTCATTGAGTTTTCAATGAAAAAGTGTTTTCGGGCCCCTGAGAAAAGCCCTGCGAACCTGGTTCCATCAATACCACACCCCACACACATCAAAAATCATCATTGTAATCGCGGATTTCTTGTCCCTACTGCAAAAATACGTTATTCCGAAACTCCGATGCCTCCCCGATCCTCCACTGTTGAGAAACAGCCCCTCCCCCCCGACAAAGCACCCCCTCGGGCGCTCGCAACAAAGAAATGCGCTGATGCGGAGCTGCAAAAGCCCGACACGTCTGATGCAGAAATGCAT…
671	1030	2986	3277	292	C	LINE/Tad1	TGGCTTCGCCGCCAAATACACGAACAGTACACAGCAGACAGGGCTGAATGGTACACCTCCGCACCGGAGCCTAAAACCTATGATGCGCCCCACTGCCGCACCCTCGACCATGCATACACCTCCCTGCCGCGCAAGCTGTCCACCGCCATCCTGGGTCTCCGCACAGGCCACGGCTACTTACTAGACTGCCTCGCCAACCACCCCACCACCACATACCCCCTCCGCACATGCTCCTGCCCGCTACACCCCCCTCAAACCCCCAGACACCTACTCCTATCATGCCCCCTATACA
672	1031	3	1404	1402	C	LINE/Tad1	CGCCTCATATGGCGGAGGAAACAGTTAACTGGGCAATTGACGATGACAATGCCATGGGGTCTGACCATGAGGTCATACGTCTCGAGGTACACACAACCCACCCAGATGCTGAAACAACTCCCCCGACAAACTGACTGAACTGGAAAAAGACAGATTGGGAGCTGTTCACTGAAACCCTGGTACCTCTTGCTCAGCCCTCACACCGACCTGGACACACTATCGTAACCACCCCACCACGGCCAACCTTGATGCGTGGACGCAGTCAATACGGGATGTCATCCTTGATGCCGCAATGACATCCACCCCCATACTACAAGTAACACCCCAATCGAAACGATGGTGGACCCCAGAAGTCACCGCAGCAAGAAAGACAATGACCAAAGCGAGACGTAAGTGGAA…
673	1031	1413	2988	1576	C	LINE/Tad1	AGCCTCCATTGATCTCTTCTCCTCTGGCCACTGCCCCCAACGACCAACCCCCCCGCCAAACCACAGCCCAAATGCCTGTGCACTCGCCCCCAGTCCGTCATCATACCCTTTCCCCACCCTGCTGTAATCGACGTTATCAACAAAGCCCAGTTGGGGAGGGAGATCAATGCCGCACTCACACGGGCACAGGCGCCGCCTCACATGGCTGTTGCCACAATTAGACAGGCCTCCTCAGGCAACCTTATCGTGACCATGATGGAAGCTACCACTGAACCCGAGCTGACTGTCAACCTAGGGACTATACATACAGTGACACAGAAAGTAAATACCTCCATCGCCGTGCCTCGCCTGAATGAGCGGTGGTACAAGCTCGCAGTACATGGGGTCCCCACGAGCCAA…
674	1033	18	2837	2820	+	LINE/Tad1	GTGGAAGGAGTATCTTTCTCAAGGCAAGGGGCCCGATGTATGGCAGGCGTTTAGGTACACTAACCCTCAACGTGCTCAGCTAACACCAAACCTTCGCGCGATGACCAATGGCCAAGAAACAACATGTAGCTCCTTCGAAGCAAAAGTGGCAGCATTTCAAAAGCTGTTCCCCCCACTGCCACCGCCACTGCCTCCATCCATCCTTCCCCCTCGCCGTGAGTTGAAGTGGACAACCTTTACACCATCAGAGATAGAGACAGCAATTTTTTCCTCGTCGCCGAAGAGAGCGCCCGGGCCCGATGGACTTACGTTCACATGCCTGCGCCGTGCATACCTGGCTGCCCCCGAACACATGAATCACCTCTACGCCACGTTAGGAACGCTAGGCTACCACCCGTG…
675	1033	2862	3614	753	C	LINE/Tad1	CCTGAAATCCCATGGCACACCTTCACCCATGTAGAAATCCGACATGCCATCTATTCCTGCTCCCCAAAGAAAGCCCCCGGCCCCGATGCCATCACCTTCGCCTGCCTCAGAAAAGCGTACGACGCCATCCCGGATCACATTAATGCGCTGTACTCTACACTCGGTAAGATAGGCTACCACCCCCGATGTTGGCGAGAAGCAACCACAGTCATCATCCCAAAGCCGAACAAACCCGATTACAGCTCGATTAAAGCCTACCGCCCTAGCACTCCTCAATTTCATGGGTAAAGTCCTCGAAAAACTAATGGCAACACGGCTGAGCCAAATGGCGGAGTCACACGACCTCCTGCACAATGACCAAATTGGCGGTCACCCTAAGTGCTCGGCAACCGACGCCGC…
676	1038	1	2972	2972	+	LINE/Tad1	GGAGTCACATGACCTCCTGCACAATGACCAAATTGGAGGCTGCCCAAAGTGCTCGGCGATCGATGCTGCGATGGCACTTATGCATGATGTGGAAGCGAATGCAGGGCGACACCGAATAATGTCATCGCTATTCTTGGATGTCCGAGGCGCGTTTGATAATGTCTCCTCAGAACGCCTGCTCGACACAATGCGCGCCCTCAGGTGCCCCACCGCTGAAACATCGTGGTGTACATCCTTCCTTAACGAGCGAACCACAGCCCTATCCTTTGACGGGAGAACAGACACCCAATGCCCAATACAAACCGGCATTCCTCAAGGCTCCCCCACCTCTCCAATTCTCTTCCTGATATATCTTCGCCCCCTCTTCGACGCCCTCAATGCAGCACACCCATCCCTCTG…
677	1039	415	2034	1620	+	LINE/Tad1	GCCGAAGCGAAGTACTGGCGACAGCGAGCAGAGACTGCAGAGAATGAGCTCATCAAGCTCGGCCACACACTGGCCCCCACCGCCCCCCCTCAACCTCCCAACCAACCATGTCAAGGCCCCCCCGCCTCCTCCGTCCTCTTCCAAACCCCCCCACAAGGCCCCCAAAAAACGCCTCCACCCAAAACCAAGCCCAAAACCCAGAACCTATCCCGCAAACCAACTTAACCCCAAGACATTGTGATCCCTTGCTCAGACCCCCAGGCTCTCCCCGAAAGCATCAAGGTAACTATTGGAATGGCAGTGAACACCGCCCTACAGGAAGCCAAGGCCCCAGCAACGCTCTCCATTATGACGGTCCGCACCAACATAGCGGGAAACCTCCTGCTCACCCCCGCTACA…
678	1043	35	2258	2224	+	LINE/Tad1	TTTGGCAATGTCTCATCTACCTGCCTCCTGCATACAATGCGCCAACTCGGCTGCCCTCGCCCAGTCCTCTCCTGGGGAGATACCTTCCTTGCTGACAGAACTACTGTGCTCTCCTTTGATGGCCGTACAGACACCCAATGACCTATCGACACCGGCATTCCCCAGGGCTCCCCTGCCTCTCCGATCCTATTTTTAATATGCCTCCACCCCCTCTTCGATGCCATCCAAACCACCCACCCTATGCTGTGGACGCCGAGCTACATCGATGACGTCGCATTGGTAGTACACGGCCGTACATGAGAAGACAATGCCCGGGCCCTTGAGGCTGCGGCCCACACAGCATTCCAATGGGCCCACAATAACGCCATGTCATTCGATGACACCAAGTCCAAATTACTA…
679	1047	56	514	459	C	LINE/Tad1	GATGGGCAAGAAACCCATAGGCAGACAGGACAACAGCGGCATAGTGTTCTCGACATGGTCTTCACAACCATGGAGCTGGAACCCCATACAATGGCCTGCAGACTGCATGACCCAGCCCATGCAACACTTTCAGACCATGAGGCAATCTGGTGGGTAGTAGACTCAGGATGACAGACTGAGGAACCCAACCTCATTACTCGAGGCTGGGCAGTCAGTGAGTGGCTTGAAGATGAAGACAAAGATAAACTGGAGGCTGCTGAAAAGGAGTGGCATTCCAGATGCAGCGGTTGTCCAGTGCTTAATACCTCCAGTACACCTGACAATGTACAGAATGAGGTGGAGTGGATCCGGGAGCAGTAAATGGAGATGCTTGACAAATATGCCAGAAAAATCAAGATC…
680	1049	2	453	452	+	LINE/Tad1	GCAACCACACATCCTGATTTCCTCCTCCTCCTACCCCCCTGTGGCGACTGCAACACAAACCGCACTGCTGCCTATGTATCCCACCGCAACCCACACCTTCGAGTAACTCCCAGACCCGATGTGTGTGCGGACCCAGATATCCAAGTCCTCGAAGTAGGCACTCCGCTCATCCCCCCCATCTATATCATAAATATCTATAATGAAAAATATAACCCCACCACCCCATACACCATCCCCCACTCCCTGGCACAACTGGTCCTACCCCAGCACTGCATCATCACAGGTGACCTCAACGCCCACCACCCGCTCTGAAACTCTCGAGTGAGGCACCCCACAAGGGCCGATGAACTCCTTACACTGATCGAAGAGCACGGCTGGCACATCGCCAACTCCCCGGAC…
681	1049	458	4181	3724	+	LINE/Tad1	GCCACCCCAGCGGTTGCCAGGGAAGTATCCAACTGGGCAATTGACGAGGAGGACCCCACCGGCTCCAACCACGAAGTCGTCCTCTTGCAGATATCCTCCCTGCACCCTGATGCGGAACATGACACACCAGAGCCCCACCTTAACTGGCGCAAAACAACCTGGGACACGTTCACGTCCACCCTCTGTGAACTCTCCGCCAACAACCAACCCCTTTGGAGCACCGTGTGTGCGAACCCCACCAAACACCAGCTCGATGACTGGGCAGACCTCCTCCACAATAATATCACCACTGCCGCAGCACAGTCTACCCCCGCACTCGTCCTCTCCCCACGATCAAAACAATGGTGGTCCCCAGAAGTGGAACACACGAGAGCGGCCATGACCAGTGCTCGCCACAAG…
682	1050	388	1271	884	C	LINE/Tad1	CCTCACCTTCAAACTACATGCCACCTCAGCTGCTGCTCAAAGAAAGAATGGCATTAAGCACCCTACTTTTCCTCCGACACAAAGGCAATGGCATACCAACCTACATTGCACAACACCTTATCATTACAGCCATCCTCCCCAAAATGCTATGGGCGTCCCCTGCCTGGTGGACTGGAAATGATAGCATTCTCAACCCTCTAGCCACCACATACCACAGAACAGCCCGTTGGGCCACTGGCCTACCACCCAGCACCAGAATCTTGAACCTCCTCACCTGCGCCCACCTGCCCCCCCTACACATCTATCTTGACTACCTCTCAGCTAAATTTGCTATCCGACTCCTCTTCCTCCCAACCAGACACAGCCTAGCAGGCATCCCGATAACACAACACTGCCCTA…
683	1051	1036	2355	1320	C	LINE/Tad1	GAAATTCAGCACTTCCTCTACCGCCCACTCAATACAGTCTGGCCCCGGCCCTGCTCTCCTCAACCCAGAATCAAATGCCATGCACTGGACAACACCTTTACCCGACAAGATGACATCACAGCACACAATGACCAACTCCAACACAACGTCGCAACTGCCACTGACATGCAATGCCATGCTGATACAATGATGAATGACCAGATGACAAAAGCCTTCCAACACATGGACCATGACCACTCCCTGCTCCGTGAAGTGCACCACCTCCTGAAATGACCAGTGCCCACAACTCTCCCCACCGACGACATTACACTGTCCCTCCCCAAAGCTTCACCCTCCCTTGCTGATGATACCACTGCCCCAACCTTCCTCACGACCACATCCAGCAAGTACTGGAAGCCA…
684	1051	2379	2628	250	C	LINE/Tad1	CCCCCCCCCCCCTGCGTTTTCAACAACCATCTGGAAATCGCCAGATTTTCGAGCGGATTATTGTTCAGCACCCCCAAAGTACCTATCCGCAACATTTTCAACCCAGGCCCTCTCTTTTTCAATGTGTTAAATGGTGAAAAAGGGATCTCTGGGCCCCGGAAGAAGTCCAGCGGACAGGTCATCAACACCCCACCCCACACACAACAAAAACCATTAATCTTCCAGCAGCATCTTGATCACACCTGCAAAA
685	1051	2837	3039	203	C	LINE/Tad1	AAATTGGAAGGGGAAGGGAGGAGGAAGGAGGGGAAGAACCTGGCAACGTGGCCCCTGAGCAAACAGGGCTCTTAACTGAATTGGCGCAATGGAAACCAGGCTGGAGAGATTTGGGGAGCTGCAGCTCCAACACTGAAGCACGCTCTGGGGCTCATCCCAGTGGGATCCTGGGGTTACAGCCAGGGCCTCAAATGATGTACATA
686	1052	58618	59112	495	+	LINE/Tad1	TGAAGAGAAAAACGTCTGAGATCCGGAGGAAAGCAACGATGGAGTGGATCTGATCCTGGACTGCGCACAGTAAAGCCTATATCCCAAGGGAGAAATTGGGTATTAGAAGGAGCCTGCGGAACGAGAAGAAGGGGGTAGCGGCACGGTATTACCAACTCATGATAGGACATGCAGTGATGGTGCCCTACTTGAAAGATAATCTTAAAAAGAGAGATTCGGATGTCTGCTGGTGGTGTGCGTCAGGACGAAGGCAGACTCGCGAGCATTTGGTCAAGGAATGTTCACGACGGAAGGGAGAGATCAAAGACCTATGGAGACGGGTAGAGAAGGACGTGGGCTGGAGAAAAGCCAAATGGAAGCCCATAGCGAGATTATTCAGAGAAGAACGAGCAGAAGAGG…
687	1054	481	3378	2898	+	LINE/Tad1	CCCCACCTGAACTGGCACAAGACAGACTGGGCAGTCATCACAGACACCCTACAACGGCTGTCCGACACCACCTACCCCCGCTGGACCCATCTCAGAGCCAACCCCACTGCACGACACTTAGACGAATGGGCAATCCTTCTCCGGGATGCCATTCAATCTGCAGCCAAAGCTGCCACACTGGTGTCGGTCCTCACATCCCGCTCGAAGAGATGGTGGACAGCAGAACTGGACCAAACCCGCAAAGCTATGACCAGTGCCTGCAGATGCTGGAAACAAACATGCCTCCACACCCACCACACCGAGTTCAAATGCCTCCGCAACACTCACTACTGCAGGATACGAGACACAAAGGATTTACTGTGGAAGGAGTACCTCGCCACAGTGGAAGGAGCAGACATG…
688	1059	8	748	741	C	LINE/Tad1	CCCCCCTGCATCTCAACAACCACCTGGAAATCGCCAGATTTTCGAGTGGATTATTTTTCGGCAGCCTGAATTTACCTTTCCGCAGCGTTTTCAGAACCGGCCCTCTCTTTTTCGTCGAGTTACACGGTGAAAAAGAGATCTCCGGGCCCCTGAAGAAGCCCCGCGCATTGGTCATCAACACCACACCCCACCACAATCAAAAATCATCAATTTTCCAGCGGAATCCCCGTCGCGACCGCAAAAACTACTTATCCCGAAATCCCGATGCCTCCCGGTGCCTCCGTTGTGGAGAAACCCCCTCTCCCTCCCGACAAAGAACCTCTCTGGGCGCTCGCGAAAGGAAAACGCGCTAACGCAGAGCCGCATGAAGCGCGCGATGCGTCAGACGCCGAGATGCAC…
689	1059	798	1033	236	C	LINE/Tad1	TAATGATAGCTCTCCGGTCTGGTGACGAATATAACACTCTGAAATGCACGGAAGTTGTCGTGCTCTTCGAACCCCGCCGGGTGACTGAGTTCTTCTCAGCCCGCTCCATTGACCAGTGCTGCAGATGTCAAAAGTTCGGCCACCACCATGCTACCTGCGCTGCTGATAATGGTCCCGTCTGCGCCATCTGCGCCCTTACCCACCCGACCGAATACCACCCATGCGCAGGCTGCCCC
690	1060	64046	64773	728	C	LINE/Tad1	CTAGCCACTCGATACTACCAATTAAAGACAGGGCGCGCAGTCATCGCAGTACACAAACGGATAAAAACAATCCAAGACGATAGATGCTGGTGGTGCAAGTCGGGTGACAGACAGAGTGTCGAACACCTGGTCAAGGAATGTAGCAAATGGCGAAAGGAACGGGAGAAAATGCAGAAAAGCATAAAACAGCACTCATGGATCAACGAAGACATAAAGTTCATGTTTTCGGACAGAGAAGCAACTCCCGCTATAATCCAATTCCTTACCAAGACGGAAGTAGGGAATATAACAAGTGAGAAGACCATGGAGAGAGCAGCGGAAAAAAGAGATGAGAAATTGGGATGGGAAGATTTGACGAGAACGGAGAAGGAAGAAGAAGAAGAAGAGAGGAGAAGAGAA…
691	1066	203	1882	1680	+	LINE/Tad1	GCCGAAGCGAAGTACTGGCGACAGCGAGCGGAGACTGCAGAGAACGAGCTCATCAAGCTCGGCCACACACTGGCCCCCACTGCACCCCCTCGACCTCCCAACTGACCATGGCAAGGCCCCCCTGCCTCCTCCATCCTCTTCCAAACCCCCCCACAAGGCCCCCAAGAAACGCCTCCACCCAAAACCAAGCCCAAAACCCAGAACCTATCCCGCAAACCCCCCAAACCCCAAGACATTGTGATCCCTTGCTCGGACCCCCAGGCTCTCCCCAACAGCGTCAAGGTAACCATTGGCATGGCGGTAAACACCACCCTATGGGAAGCCAAGGCCCCGGCAACGCTCTCCATTACGACGGTCCGCAAAAACATAGCGGGAAACCTCCTGCTCACCCCCGCTACA…
692	1066	1912	2722	811	+	LINE/Tad1	TATCACTCGACTACCGCCTCCCCCTGCGCTCTGAACAACCACCCGGCAATCGCCAGATTTTCGAGCGGATTATTGTTCAGCGCCCCCAATTTACCTTTCCACAACATTTTCAGTCCAGGCCATCTCTTTTTCAACGTGTTACACAGTGAAAAGGAGATCTCCGGGCCCCTGAAAAAGTCCAGCGGCACGGTCATCAAAACCCCCCCCACAACCACCAAAAATCATCGATTTTCCGGCGGAATCCTTGTCGCACCCGCAGACACTACCTATCCCGACATTCCGATGCCTCCCTGCTCCTCCGTTGTGGAGAAACACCCTCTCCCTCCCGACAAACCGCCCACACGCGACCTCGCTACCAGCAAACATGCTAACGCAGAGGCACAAGACATGCATGCACGC…
693	1067	9558	10396	839	+	LINE/Tad1	ACCCGGAAATCGCCAGATCTTCGAGCGGATTATTGTTCGGCACCCTCAACTTACCTTTTCGCAGCATTTCCAGACCAGGCCCTGTCTTTTTCGTCGTGCTACACAGTGAAAAAGAGATCCCCAGGCCCCTGAAGAAGCCCTGTGCAATGGTCATCAACACCACAACCCACAATTACCAAAAACTATGAATTGTCCAGCGGAATCCCTGTCGCGCCCATGCAAGCTACCTATTCCGAAAATCCGATGCCTTCTTCTGCCTCTGCTGTGGAGAAACAACCTCTCCCCCCTGACAAACCTCCCATATGTGACCTCGTGAACAGCCAACATGCTAATGCAGAGCCGCATGCGATGCAGAGTTGAGATGCTTACCACAACATGATCCACGTTGACGCGCAATAT…
694	1077	4129	5250	1122	+	LINE/Tad1	CTGGCTCTGTCATTGGGTCAAAGAACAACAAACTGCAGATTGGACAACATGGTACGACACCTTGCCCAAACCCAAGATGTACTGTGCCCCTCACCGATGGTGCTTGGACACTTCCTATACCTCCCTACCCCGCTGACAATCCGCCACAATCCTCGGCCTCCGAACTGGACATGGATACTTCCTGGACTGCCTTGCCCATCCCCCCACAGACAACTACCCCTCCCAATATTGCCCATGCCCAATGCACCCACCCCAAACCCACAAGCACCTTCTCCTATCCTGCCCGATTCACAATGCAGCATGGAACCAATTGAGAAGCAAACTGAAAATCCACCATAACCAATGCCTTATCCTACAAAACATTCTACACACCACCAATGGAGTCAAAGCCCTTGCCGA…
695	1080	21	2685	2665	+	LINE/Tad1	CCCGAACTCCCATGGCAGACATTTATGCCCACAGAAATACGACAGGCCATCTTCACTTCATCACCCAAAAAAGCCCCTGGACCAGATGCCATCACCTTCGCCTGCCTCCGGAAGGCATATGATGCCATCCCCGACCACATCAATGCTCTATATGCCATGCTCAGGGAGGTAGGCTATCACCCCCACAGCAGGCGAGAAGCGACCACCATTGTCATCCCCAAACCCAATAAACCACATTACACCTCAGTAAAGGCATACCACCCTATAGCGCTACTAAACTGCCTAGGCAAAGTCCTGGAAAAACTAATGGCAATGTGGCTGGGACAAATGGCCAAGTCACATGACATTCTGCACCATGATCAAATCGGAGGTCGCCCCAAGCGCTCAGCTATCGATGCC…
696	1085	110	2372	2263	+	LINE/Tad1	ACAAATGGCCGAGTCACATGACATTCTGCACCATGATCAAAGCGGAGGTCGCCCCAAGGGGTCGGCTATCGACGCCGCGATGGCGCTAAATCGAAGCGAATGCAAGTCGCAAATTTGTGACGTCATCCCTATTCCTGGACGTCCGCAGTGCCTTTGATAACGTCTCCTCCGCGCGCTTACTCCACACCATGTGAATCCTCGGCTGCCCCAAACCCGTTATCACGTGGGGCACAACATTCCTTACTGAGCACACCACGGCGCTGTCATTCGATGGACACACAAACGTGCAATGCCCAATCACAATGGGCATCCCCCAGGGCTCCCCCGTGTCACCAATCTTATTCCTTATCTACCTCCGCCCCCTTTTCGACACCCTCAATGCTGCCCACCCCACCGTAT…
697	1089	3	1701	1699	C	LINE/Tad1	CCTGGCTTCCCCATCGATGGCAAGGGAAATAACAAACTGGCCATCGACGATGGAATAGCCACAGGTTCAGACCATGAGGTCATCCGTTTTCAACAAAACTCTCTACATCCAGACCACATGGCAACCCCCCTCCCAACTACTCATCTAAACTGGAACAAAACAGACTGGGATATGTTTACAAAGGAGCTGCAGCTCCTTGCGGAGGCCAGCCACCCATACTGGACACACCTCCGCGCCAACCCCTCCGCAAGCAACCTCGACGAGTGGGCTGCCCTCCTCTGCGACTCCATACAGAGTGCAGCCTCCAAGGCCACCCCGACCCTATCACCCACCCCACGCTCGAAATGGTTGTGGAATAAGGAAATCCGCCACACCCGTCGTGAAATGACCACCACCAGG…
698	1089	1938	2152	215	+	LINE/Tad1	AAGAGACACAGGGGATGAGGGGAAGAAGGAGAGGGAGTCATGGAGGTGAGGGACGAAGGGAGAAGTGCAGGAGTAGAAGGAGTAGCGGAGAAGTGAGAGAGGAGAGGCGGGGGGGGCGGTGGCCCGGCGGAGTTATCTTTTTCTTTTCTTTTCTGGTATGTCTTGGTTTGTGGTAGAAATAAAGGCAGGAAAATGGCTAAAAATGGGCGGGGAAG
699	1091	20437	20768	332	C	LINE/Tad1	GGACTTTGATGTGGTGGAGACGGAGTTGTCCGACGAAGCGATGGCGGACGCCGATGATTGGTTACACGAAGAGTTTTGGGAGCGAGTAGAGGCGGGATGAGGGGACGAGAATGGGGACGTATAGAGTTAGATTGGCTTTCTTTCGGGGACGCTAGAACGAGGCTTTGGCGTTTTCATTGGGGACGTATAGAGAGATATGTGGGGAATGTTGGAAATTAGGCAGCTCACGGAGCATGATATTATGATTGATAAAAGACGTTTGTTAAAAGGAATATTTAGACTGTATTTAGAAGGCGAAATCCATAGGATAGCCGTAATAAACTTATTAAAAA
700	1091	20803	21007	205	C	LINE/Tad1	AATGACCGCCTAGCCGCGGCCAAATCCAGCCGAATTCCACTGCACATAACGGCTTTCTTATACCGAGACGTAGCACACAAGGCACTGGTAGAGTTACTGCGCAACACGGGAATAGGAACGAACATGGATAGGGCGGAGAAGGAAGAGGAAAGTCGGGGACGAGGAGGCTTTGGTAGGCGGGTGGATGGCCAATGGGACGGCGCAC
701	1091	55708	55959	252	+	LINE/Tad1	TGAAGTACTTGGAAGCCACCGAGATCCGGAATAAAACCGCCAAAAAATAGATGGAACAGACAGAAGAAGAAAGGGATGAGGTATGGGGATGGAACGTACTAGAAGAGGAACCGGACCAGAGAGCAGAAAACGTGGATAGAGAGAAAATGGCAAAAAGAATGAGCGAGGTGGCGAGGTTTATTGCGGGGGTTGTAGCAAAAGTAGAGACGACAGGCGCGGCGCGCGAGAACGGATGAATAGAACGAAGAATGT
702	1094	139082	139383	302	C	LINE/Tad1	CACCTATTCAAGGTATGTACCAAATGAAGAAGAGAACGAGAGGCATTAGCAAAAGAAATAAAAAGAGGTCTATGGTACCATCGAGAGATGTGCCATATTTTCGCTGATATCAAGTCAACCAAGCATATCATTTAATTCCTACTAGATACGGAAGTGGGGAATCGAACAGCCAAAAAAGAGAAGGAACGGAAGGATGAAGAGAGGGACGAAGTTAATGGATGGGAAGAGCTCATGAAAAACCTACCAGAGCAAACACAAGAAGAGGAGGAAGAAGAGAGAAGAAGAGAAGAAGAGAAGAAGAA
703	1096	13391	13633	243	C	LINE/Tad1	GGTGACACAACCACCATGGATGATGACCAAATCTGCTGGCAATGAGACCAATCACAGACCATTGCTGATTGGATGGAAGATCACCACTTCTTTCTGTACAATAAACCTGGACACCCCACACATTTCCCCAGAAATGGCATGCAGCCATCTGTCATAGACCTCTGCTTCTCAGCCAGATGCATTACTGAAAAAGTCCTGATGCATGAAATCAACCCTGACTCAACCTCAGACCATGCAATATGT
704	1096	15525	15900	376	C	LINE/Tad1	ATCAGCATTATTTACTTTTGCATCCAACCCTAATACTATTATTATTTTATTGCAAGAACTGGCCATTGAACACACCAAACTCCCCCCCACACACCCAGACTTTCACATGTTTACCCCTGTTAATGAATGACCCCTGTGCACCACCTATGTCCACCAACTACTTGGTGTACAAACTGACATCACTTTCACCCACACTAATTCTTTCCTTGGAACATGAATCTCATTACCTACTAACCCTGCCTTTACCATATACAACTTCTACTCCCCTGGAAAACCCCATGCACTAGCCAACCTCCTACCCTCCTTCTGTGCCCAGCTCCCTGTAATCATTATGGGAGACTTCAACACCCACCATGAAAGGTGGGGCAGCACAACC
705	1099	353	1854	1502	C	LINE/Tad1	ACCCCCCCCCCCCTGTGTTTTCAACAACCACCTGCAAATCACAAGATTTTCGAGCAGATTATTGTTCAGCAGCCCCTATTTACCTTTTTGCAGCATTTTCAGACCAGGCCCTGTCTTTTTTGCCATGTTACACTGTGAAAAAGAGATCTCTGGGCCTCTCCAGAAGCCCTGTGCATTGGTCATCAACGCCACACCCCACCACAATCAAAAATCATTAATTTTCCAGTGGAATCCCCATTGCAACAGCAAAAACCACATATCCTGAAATCCTGATGCCTCCCAGTACCTCCATTGTGGAGAAACAACCTCTTCCTCATAACAAACCTCCCTCACATGTGCTCATGAACAAAAAATGTGCTAGCACAGAGCCACATGCTATGCAGGGACATGATGCATATC…
706	1104	1	1890	1890	+	LINE/Tad1	CAGAACCGGCATCCCTCAAGGCTCCCTGGCGTCCCCAATCGTTTCCCTGATTTACCTCCAACCCCTCTTTGACACCCTACAGAATGCCCACCCCACAATTTGGACACCCAGCTACATGGACGATGTCACCCTTGTTGCACATGGTCGCTCCAGACAGGACAACGCCAGGGAACTCGAGTCTGCTGCTCGAACCGCCTTTCGCTGGGCGCAGCAAAATGCAGTAGCCTTCGATGATTCTATGTTGGAGTTGTTACACTTTCACCGCTCGTGCACCGACAATCTGACAGAGGGAGTCAACGTCCGCCTTCCAAATGACACGGTGGTGACCCTGGGAACAAGAGGCAGAAAAACAGACATAGTTAGACGGATCGGGATTGTCTTTGACAGAAAACTTTCCTT…
707	1109	5507	5832	326	+	LINE/Tad1	CGATAGCACAACTGTTTAGGGAGGAGAAAGCGGAGAAAGCAGTGCTAGAATTCATAAGGAAGACGGGGATAGGCAAAATGAGCTGTACGAGTAGACCAGAAGGAAATCATGAAGAGGGCGAAAGTGACGAGGTGAGAGAGGGTGAAAACCCAGGCATGTAATAGGAGAAGACGAAGGGAGTTTATACAGGCGGAAAGAGGGTAAAGAAGGGGAGCACAATTGATGCTGAATAAGGCAGTGGACGGGATAGGGTAGAAGAAAAGCGGGCGGTCACATACTCAGCAATGAGTGACGGTCGCGATAATAAAATTTGATTCAAAACAAAA
708	1112	4	2292	2289	C	LINE/Tad1	CCACACAGCAACCACTGACCCCCCCTGCATTTTTTAACACCAACCTCAAATTTCCCAGCTCTGCTGATGGAAATCACTTCATCAAACACTGTTTATGCCGAATCCCGAATTCCAGGCCCGAATTCCTGTTTACCATTGTGTTTCAGTGGAAAAACGTGATTCTGGGACCTCCGGACCAGTCAATGGGCCTTTCCATCAATGCCGCCCCACCTCCCGCCCTCCGGTCATCAATCAAACCTTATTTTTGGTTTCAGCATACCGAAATCCCCCCCTCCCCAAATTCCCCTATTGCCAGCAGCACTGGTTGTGCTGAACCCCAAAATTTCCCTCCTTTCGGACCCCCCTTTCTTTGTGAAAATATTTTTTCTCGCTTAACAAGAGCATCATCACGTGATCCTC…
709	1114	762	1123	362	C	LINE/Tad1	AAGGAGGGAACGGAGTGGAGCTGAGGAGTGTAGCATGAAGGAAAGGCAGAGACGATGGGGAGGGGAAGGGGAGAGAGGGGCGAGGGGCGCGGGCAAGGGTGGCTGAAGGAGTTTATCATGTCTTTTGTTGAGGAGGAAATAAAGGCAGAAAAATGGTTCAAATTGGAAGGTGAAGGGAGGAGGAAGGAGAGGAACAACCCAGCGAGGTGGCCCCTGAGCAAGCAGGGCTCTTAACTGAATTGGCACAATGGAAACCAGGCTGGAGAGATTTGGGGAGCTGCAGCTCCAACACTGAAGCATGCTGTGGGGCTCATCCCAGTGGGATCCTGGGGTTACAGCCAGGGCCTCAAATGATGTACATA
710	1115	43	388	346	C	LINE/Tad1	ACACCACCCCACCATGGAAACACTCTATGGCTATCCTAGGCCTCCGTACGGGACATGGCTACTTTCTGGACTGCCTCGCTCACGCCCCCACAGCCCAATACCCTAACTGCAATTGCCCCTGCCCACTCCATCCCCCACAAACCCAAAAGCACCTTCTCCTCTCATGCCCAACATACAACACCCATAGGACCGAACTACAGAGCATGCTGAAACTCCCCTGCTACTGCCGACTCACCACACCGATGATCCTTCACATGACCGCTGGGACGAAAGCCTTATCCACCATGATATCAGTGACTAAGATCGCGACTGCCAAATGGGAACACCCAATGTTAAGTAAGCCCCC
711	1117	3418	4402	985	+	LINE/Tad1	AGGAAGGCACCAGGGCAAAAGACTGAAAGACCAACAGAAAAATCACCACACAAAACAACCCCTTGACACCAGTCAAAGAAACCAAAGACCCCCGAGACAGACAAGTGGTAATGGAAAGAGTCTCAACAACAAAGAAACCGGATGCAAACATGGACAAATCAATGATGCACACAATAAACAAACACCTGATCGACCACAACGCCCCGGAACACATTCGCATCGGCCTGGCAAGAGTAACCACAAATGGAAACTGGAGCGTATTCTCCAAATAGAAAGCAAACGCAAAAATGCTAACACGAAAAAAATTAAACCCCTGATATTGGAAGCGGCAAGAAACATTGACAAAGACATCATAGATATACAAGAAATCAACCCATGTCCAAGAATCAAAATCCACCA…
712	1117	4572	6133	1562	+	LINE/Tad1	ATGACAGCAACCATCCCAACCACAACACCATTTGGCTCCGAAATCCGGTGGCGAGAAAAAGGCCAACAAAAAAGAAGCGAAGAAGTGCAAAAGATGCTAAACCGACAAGCCAGGGCAATGACTGGATGTATGAAAAGCACTCCCATCGGCGCACTCATGGCAGAAGCAAGCGTAACCTCGGAAGTGGTTCTGCTAAACCACAGACAACGACGATTCGCAGACAGGATTGCAAGCCTACCAAAAGACCATGACAAAACAAATGCTACAGCTAGGCAGTACAAAAAACGATGAAGACACATCGGACCTAGAATAAAGACCACCGAAAACACCAAGAAGACAAACGAACCTCTGACATTGCCTAAACAAACACCTCTCCGGAAAAATCGATCCCAAAATCGG…
713	1117	113438	113833	396	+	LINE/Tad1	AAGAGATAAGAGAATTATGGAGAAGGATTGAGAAGGACGTTGGCTGGCGGAAGGCCAAGTGGAAGACGATAGCGCAGCTGTTTAAGGAGGATAAAGCAGAGAAAGCGGTATTAGAGTTCATAAGGAAGACGGGTGTAGGCAGAATAAGCGGCACGAGTAGGCCGGAGATAGATCACGAGGAGAGCGAGGAAAGTGATGAGGAGAGATAGGGTGCAAACCCAGGTATGTATTAGAAGAAGACGAAGGGCGATTACAAAGGCGGAAAGAGGGAAAAGAAGGGAGCCACAGTTGATGCCACATAAGGCAGTGGACAGGATAAGATGGAGGCGAGGCGGGCGGTCACACACTCAGCAATGAGTGACGGTCGCGATAATAAAATTTGATTCAAAACAAAAA
714	1117	210319	210670	352	+	LINE/Tad1	GCCGTGATTGGCTCACATCTAATGCGAATCAAATCACTCGAGCACGACAAAATGCTGGTGGTGCGATGCCGAGGAACGCCAGACGGTGCATCACCTTTTCAGGGAATGCCATCGTTGGAGAAAGGAACGGGAATCACTACGGAAGGAGATAGGACAAGCGATATGGGACCACCGCGGGGTAGAGCACATCTTCGTCAATAGACCAAAAACGAAGGCCATCCTAACGTTCTTGGAAGAGACGGAAATCGGAAACAGAACGTCCCAATCAGAGGCCGATAAAAGAGCAGATGGATGGAATAAGGGGTGAAATCAGAAGAAGATGAAGAAGAAGAAACGGGAATTGAAAGAAGGG
715	1119	888	2363	1476	+	LINE/Tad1	CCCCCGCGATTATCACCATAACCACGCGGAAATCCAGAGATTTTCGTGCGACAGCGTTATCAGCGACCTCACTTTACCTAGCTGAAGCATCTTCAGACCAGGTCCCCTCTTTTTCATCGTGCGAATGGTGAAAAAGAGATTTCGGACCCCTGAAGCAGCCCCCAGCAATGGACTTCATCACCACCCTTCAACAACAACCACCTCAATCATCGAACTCATTTCATTCCCTCCCTTAATCGACCAAAGTAAACCTATCCCGAAAAGCCGATGGCCCCACGCACCTCTGCTATGAAGAAAAAACCAATCCCTCCAGACAAACCCTCTCTCCCAGTGCTTGCATCCAGCAGACATGCTAACGCAGAGCCGCATACTCAATGTGATGTGCAAAAAACAATGCAC…
716	1125	16666	18807	2142	+	LINE/Tad1	CCACTGCGATCACCACAACCACATGGAAATCCACAGATCTTTGTGCGGCAGCATTATCAGCAACCTTTCTTTACCTAGCTGAAGCATCTTCAGACCAGGCCCGCTCTTTTTGGTCATGCGAACAGTGAAAAAGAGATTTTGGACCCCTGAAGCAGCCCCTGGCTATGGCCTTCATCACCACCCCTCAACAACAACCGCCTCAATCATCGAACTCATTTCATTTCCTCCCTTCATCGATCAAAGTAAACCTATCCCAAAAAGCTGATGGCCCCACACACCTCTGCTGTGAAGAAAAAACCAATCACTCTGGACAAACCCTCCCTCTCAGTGCTCGCGTCCAACAGACATGCTAACGCAGAGCCACATACTCAATGCGATGTGCAAGAAACAATGCACCTC…
717	1126	17685	17940	256	C	LINE/Tad1	CATGGCATACGTTGTAGGCTTCGGCCAGATTACCAGGGGTGTCTCTTTTGTTTATTATTTTCATTAGGCGGTATGGCAGTAGGAGACGGGAGTGCCAAAGTTGACGTCTTTATCTTTATTATTTAGACAGTGGACAGGAAAGTAGGGGGGACGCATGTAAGGCCCCTACGGGGCGGGCCCTTCAGGCAAGCGGTGCCATATTCTAGCTAGAATGCATGCACCGCTATAGCAAATATACTGATTCAAAACAAACAAA
718	1132	3	792	790	C	LINE/Tad1	TAGCCGCGCCAGCTATGGTACAGGAGGTGACGAACTGGGCAATCGACGAGGATAACACCACCGGGTCTGATCACGAAGTAATCCACTTCGAAATAAGCTCATTACACCCAGACATGGAGTTCAACACTCCTGCTCCTCGCCTGAACTGGAAGAAAACAGATTGGGATACTTTTACCCTCACCCTACAGAAGCTTTCCGAGGCCGCCCGCTCCAGATGGCGCTCCCCGGGCAAATTCCCCACCCACACAATGCTCGATGCCCAAGCAGACCTCCTGTGAGACATTATAGTCGAAGCTGCCACTGCCGCCACACCGCCCACTACACCCTCGCCTCGATCAAATAGATTGTGGACACAGGAAATCACAGAGGGCCGGCGCGAGATGAACAACAGCAGGAAAA…
719	1132	795	1875	1081	C	LINE/Tad1	TGTCCCACCCGGACAAAAGAGTTGGAAAAGCCGCCTCAAGCGTGGTCATTGCCCTGCCGTCCACAGGAGAGTACAACTCGCTCCGCCGGAGCAAGGTGATTGTATTATTCAAATCTCGCAAGGTGACGGAATACCACACCGCTCGAACCACTGACCAGTGCAGACGCTGCCAACACTATGGCCACCACCATGCCACCTGCACTGCAGAGAGAGGCCCGACCTGCGCACTGTGCGGCGGCAAACACCCCACCGAATCTCACAGCTGCCCGTTCTGCCCCAAACGGAAGGGTCGAGCATGTACTCACACAGTATACGGCTGTGTTAATTGCACAGAAGCCGGCCTCGCCGACACTGCCCACCCCTCATTCGTCACGAAATGCCCCATGCGCATCACGATCC…
720	1132	1891	2319	429	+	LINE/Tad1	GACCACACCCCCCCCCCCTGCGTTCTAGACAACCACGTGGAAATCACGAGATTTTCGAGTGAAATCACATTCAGCATGCTCAATTTGCCTTACTGCATTGATTTCAGATCAGGCTCCCTCTTTTTCAGCGTGTTACATGGTGAAAAAGGGATTCCCAGGCCCCTGAAAGAGACCCGCAGTACGGCCATCAACGCCCCATCCCACAACCACCAAAAACCATCTTTTTTCTGGCGGAATCTTTGTCGCGCCCGCAAAAACAGACTATCCCGAAACCGCCATGTCTCTCTGCCCTCCCGCGGTGGAGAAAACCCCCCCCCTCTGGAGCAAAACCTACCCCCTCCGCAATGCTGCAGCAGAAAAATAGCGCTAGCGCAGAGCCGCAGCCCCTCGCAGCAATTT…
721	1134	702	1774	1073	C	LINE/Tad1	TTTTCAACAACAACCTCAAATTTCCCGGCGCTGCCGACGCAAATCGCCTTAGTGCACACTGTTTACCCTGAATCCCGAATTCCAGACCCGAATTCCTGTTTACCATTGAGTTTCAGCGGAAAAACCCGATTCCGGGAGCTCCGGACAGGTGAACAGGCCTTTCCATCAACGCCGCCCCACATCCCACCCTCCGGTCATCAAACAAACCTTATTTTCGGTTTCGGCATACCGAAATCCCCCGCCCCCCAAATTCCCCTATCACCAGCAGCACTGGTTGTGGTGAACCCCCAAATTTCCCTCCTTTCAGACCCCCTTTCTTCGCGAAAATTATTTCTCGCTTAACAAGAGCCTCATCACGTGATCCTTCGCCCATCGCTTACGGAGTCCCCGATTTAGCGA…
722	1135	2	618	617	+	LINE/Tad1	ACCATCCGCTGGGTCCCAGGACATACCAATGTGCCCGGGGACGAAGCCACCGACGAACTGGCTCGACAGGCGACCACAGTCCCGCCACTTCGACAACTACCGATATCCCTCACCTGGATACGGCGCTGCACTCAAGAACAGTACACCGAAGACTGGGCTACCTGGTTTACCCCATCCCCTGAGCCACGGACGTACGCCGCTACACACCGCCGCAAGATGGATGCAGCCTACACCGACAACCCCCGCTGGATATCGACTGCGATCCTGGGTCTTCGCACAAGACACAGATACTTCCTCAACTGCCTAGCCCACCCTCCCACAGAAGCATACCCCTCCCAGCGATGCAGCTGCCCTATCCATCCACCACAGACACATCGACACCTCCTCCTGAGCTGCCCC…
723	1135	1238	4175	2938	+	LINE/Tad1	TAGCAGTGCCAGCTGTAGGGAGGGAGGTAACGAACTGGGCAATCGACGAGGAAAATGCCACTGGCTCTGATCGCAAAGTGAAACACTTCCGAGTGGACTCACTCCACCCCGAACTGGAGTTCAACACCCCGTCACCTCATCTTAATTGGAAAAAGATGGACTGGGGCACCTTTACAATTACCCTCCAACAACTCTCCGAAGCCAACAACACCCACTTGAGGCTCTTGTCCAGAAACCCCGCCCCAACAAACCTGGACTCCTGGGCAGAAATGCTGCGAGACATCATCACTGAGGCAGCAACTGCCTCCACCCCTTACCTCACCCCCTCACCCCACTCCAAACTGTGGTGGACAGACAAAGTGACAACCACCCGCAAAGCCATGACTTGTGCCCGCAAGA…
724	1136	70	446	377	+	LINE/Tad1	GAGAGGGAGGAGCATGGAGAAGGGCGAGGGGAAGGAAGTAGAGAAGGAAAAGTGGCACAGGGGAGAGAGGTGTGATGAGGGGCATTAACCCGGAGGAGTTATATCTTCATTTGTTTTCTTTTGTCTCTTTGCTTTTGCTTTGTGGAGGAAATAAAGGCGGAAAAATGGTTAAACATGGGAGGGGAAGGGTGGAGGAAATGGGGGAACGACCCGGCGAGGTGGCCTCCGAGCATACAGGGCTCCTGGAACAGATGACGCTTGATGAACAAAAGCACAACCAGACTTGGGGGTCTACAACCCGACACCCTAAAGATGAGCTCTGGGGCCTACCCAGTGAGAGCCTGATGTCACACTCAGGTTTCTTAATTTTGTATTTA
725	1136	511	737	227	+	LINE/Tad1	CTCCCCAAAGCCAAAGGCATATGCTGCACCACATCAGAGAAACCTCGATGCAGCCTACACAACCCTCCCATGAAAACAATCCACAGCTATCCTAGGACTTTGTAGCGGCCACAGGTACTTCCTCGATTGTCTTGCCTGCATCCCCACCTGCAAATACCATTCCCACAACTGCTACAGCCCCCTTCACCCTGACCAAACCCCCAAACTCCTCCTTCTCCCCTGCCCCA
726	1136	811	1211	401	C	LINE/Tad1	AACGAGGAGAAGGAAGAATGGAGGGTGCATGGCAGGGGTGCAAGGGAGAGGGGGAGTGGAGAGCGGAAAGTCGACGAAGGAGAGCAGGAAGAGGAAGCATGGAGAGGGGGTGGGGTGGTGGAAGCCTGGAGGCATTTACCATTTCTTTTGTTCTTGTTTCAGTTTTTGCATTCAGAGGAAATAAAGGCAGAATAATGGATTAAATATGGGAGGGGAAGGGTGGAGGAAATGGGGGAATGACCTGGCGAGGTGGCCTCCAAGTGCACAGGGCTCCTGGATCAGAAGACACTAGATGGACAAAAGCATTATCAGTGTTGGGGGACTACAACCCCACACCCAACGAAAGCTCTGGGGCTTATCCCAGTGGGGACTTGTGGTAGCAGCTGGTCCTTACCCTTG…
727	1136	1587	4567	2981	C	LINE/Tad1	GCCATGACAGGCACTCATCGAAAGTGGAAACAAATGCACCTTGCTGAACACCACCAGGAATACTGGAGATTGTGCAACACTCACTACCGCAAAGTTGGCCATGCAAAGGACTCCATGTGGAAGGCCTACCTCACGGCAGTGGAGGATCTGGACATATGGGCTGCGTTTCACTATACCAAGCCCTGCAGAGCCCAACTTACCCCACCCATCAAAACTCAGGTAGGAGGACAAGACCACCTCAGCATGGACTGTGCGAGCAAAGTCAATGCTTTTCAGGTGCCATTCCCACCCCCCCTGATCACCCCCCCTGCCAAAATCTGAACCCATTCCCCCACTATCCGTTGGCATACCTTTACCCCAGCAGAAATCCCTCATGCAATCCACTCCTCCTCCCCCAAC…
728	1137	3	906	904	C	LINE/Tad1	CCGGGCCCCTGAAAGAGACCCACAGTGTGGCCATCAACACCCCACCCCACAACCACCAAAAACCATGCTTTTTCCGGCGGAATCTTTGTTGTGCCCAGAAGAACAGACTATCCCGAAACCCCCATGTCTCCCCGCCCTCCGGTGGTGGAGAAAACCCCCACCTCCGGAGCAAAACCTCCCCCTCATGACACTGCAGCAGAAAAACATGCTAGTGCAGAGCCACAGCCCCTGCAGAAACACGACGCGCACGCTGATGCCATGCATATCGACTCTGACATCAGCGACATCTCCAATGTGTCTCCCCCCTGCAACAGCACCCCATCACCCACCCCTCGCAACAATGCCCAAGCTTTCACAACCCCGCCCGCCCAAAAAGTCTTCCACCCAGTCAACATCATC…
729	1137	1435	2753	1319	C	LINE/Tad1	AATGCCTTTACCTCCACACCGGTCTTGGCGCTCCACAATGAATCCGCACTCCCGCCCATCACAGTGCGCCTCGACAACCGCCAGCAGAAATACGCACTGCGCACCCTCACTTTACCCACTTCGCACCCGATTATCACACGCTGCCCAGTCTCGTTCCCCACGCCAGGTGTCGAAGATGCCTCCATCAACTCAGACACCAAGTACGACCACCCATGGCAAACCCCAGGAAACGCCCTGTCCTGCCTCCTCCACATCATCAACACACTCTCCCCTGGGTCTGACCCAATGCCGAGATCGAGGACACCTCCCAAAACATCCCCGACGATGCCCTCACCCCCACACTGACAGTCGACATCTCCCCCTCTCCGAAGGACAAGGCTGCCGATGACCACCTCCTCC…
730	1138	25717	29040	3324	+	LINE/Tad1	CGACTCCACCTCCACTTTTTAAAAATTCAAGCACAAAACATCTTTTAAGATCCAAAAAGAGACGTCCTCCCGCCTGACAATGACGGAGGACGCATCTAATCGTCCGGAAGATGAAGGAGGCCAAAGAGGCCCCGGAACTGGACCTGAATTCGGTGAATATCGCGAGAAACCTCAAGAAACCGCCTCGGACTTCTCCGACCTTACCGACTTCGAAGCCGAAGCAGAAGACGAAGGAGACGCAATGGAGATCGAGACGAACAAAGAAACCAACCAACCCAGCCCTAAAATCGAAAAGCCAAACCCCGAGATCATCGAAGCGAACCCCCCGGCCAACCTGGACCCAAGCTCAAGCCACCTGAACCCGCCGCTCCCGAACCCCCAACTAACCAACCCTGAGAC…
731	1138	30233	32387	2155	+	LINE/Tad1	ACAGAAAAGCATCACTGGTGATTACAAAAGTGCCATGAAAAAGACAACAACCGGAATACCTCAAGGATCGCCAGTATCACCCATTGTCTTCGCAATCTACATATCCGGAATCTTCGAAGAAATAGAAGAAGAAGTCCTGGGATTCACAGGATTGTCATTGTTGGATGATATATCATGGCTGGCTGTAGGCAAAAACGTAACAGAGATAAGGAACATATTGATGGCATGCGGAAAAGCAGCAAAAGCATGGGCAAGCAGAAACGCAGTGGAATTGCACGTGGCAAAAACAGAAGTAGTGATATTCACCAAGAATAAAAGACGAACAGCCATGCCGATAAACCTGGAAGATGGAATACAAATCAAGTACAACAAAGGCGCAACGAGATGGCTTGGATTCTG…
732	1139	23	418	396	C	LINE/Tad1	ATTCTTATTCGGAAGCCCCAAATTACCTACCCGATGCCTCCTAAGACCAGGCCCTCTCTTTTTCGTCATGCAAATGAGGAGAAGGAGAATCCGGGCCCCTGAAGAAGCCCTCGGAGCAGGAGACACCACCCCCCACCAACCCCGCACAACAGAACACCTCGATTTTCCAGTCATTCCCATATCGCAAGACCAACACAACCTTATCCCGAAAACCCGATGGCACCCCGCGCCTCCACCGGCAAGAAACGCCCCATACCCCCCAACAAAATGCCCCCCTTCGACCTCACCTCGAGCCAACACGCTACCGGAGAGCCGCATGCGATGCAGGAATGCGACGCACTGAACGACACCATGAACGTCGACTGTGACGTCAGTGACAATGAAACCGCGTCTCCC
733	1140	23	942	920	C	LINE/Tad1	CCCCCCTGCATTTTCAACAACCACACTGAAATCGGAAGATTTTATTGCGGATTACTGTTCGGCAGCCCCGAATTACCTATTCGCAGCATTTCCAGACCAGTCTTACTCGGTTTCATTGAGTTTTCATCGAAAAAAGAGTTTTCGGGCCCCTGAGAAAAGCCCCACGAACACAGTTCCATCAACACCGCACCCCACACACATCAAAAATCATCATTTTTAATCGCGGATTCCTTGTCGCTACCGCAAAAATACCTTATCCCGAAACTCCGATGCCTCCCTGATCCTCCGCTGTTGAGAAACAGCCCCTCCCCCCCAACAAAGCACTCCCTCGGGCGCTCGCGATGAAGAAATGCGCTAACGTGGAGCCGCAAGCGCCTGAAGCGTCCGACATGGAAATGC…
734	1142	5	674	670	C	LINE/Tad1	CCCCCACGATGTCAAGGGAACTCACAAACTGGGCAGTCGACGACGACCTGGATACGGGTTCAGACCACGAGGTCACCCGCTTTCAACTGACATCTCTCCACCCAGACCATACCACCGCTACCCCCACCACCCCACGACTCAACTGGCTAAAACGGACTGGGACACCTTTACCAAGGAGCTACAAGCCCTCGCCGAGGCCAATCACCCATACTGGACATACCTCCGCGCAAACCCTTCCGCGAGTAACCTGGACAAATGGGCCGCTCTCCTTGGGGACTCCATCCAAACGGCTGCCCAAAAAGCAACACCCGCTCTCACACCAACTCCGCGCTAAAAGAGATGGTGGACGGAGGAACTATGCGCGACACGCCGGAACATGAAGAATGCAAGAAAGAGGTG…
735	1142	992	1764	773	C	LINE/Tad1	CAGGCGGAAGGCGCAGATATATGGGCTGCGTTCCGATATAGAAACCCATGCCGCACCCAAATCACCCCGCCTATTCGCTCAACGGTAGGTGACGAGGTCCGCCTCTGTGTGGCGCCTCTGTGTGGCCTTTGAGAGTAAGGTGGAGGCCTTCCACGGCCCCTCCTTCCCCCCCCAACCCCCACGCCCCTCCCTACACTCCACTCCCCCGGCCGATCCGAGCTTCCGTGGCAGACGTTCACCCCAGAAGAGATACAGTTAGCCATACCGACCTTGTGGCCAAAGAAAGCCCCGGGCCCAGATGCCATAACGTTCGCGTGCCTACGACAGGTGTACGCAGATATACCGGAACACAATAATGCCTTTTACGCGAAGCTCGGAGAGGTGGGATACCACCCCAAG…
736	1146	1528	2946	1419	+	LINE/Tad1	ATCACACAGCAACCGCTGACACCCCCTGCATTTTTTAACAACAACCTCAAATTTCACCGCTCTGCCGACGGAAATCGCCTTATCGCACACTGTTCACCCCAAATCCCGAATTCCAGGCCTGAAGTCCTGTTTACCGTTGAGTTTCAGCGGAAAAACACCATTCCGCGACCTCCGGACCGGTCAATGGGCCTTTCCATCAACGCCGCCCCACCTCCCGCCCTCCGGTCATCAAACAAACCTTATTTTCGGTTTCGGCATACCGAAATCCCCCCCTCCCCAAATTCCCCTATCGCCAGCAGCACTGGTTGTGGTGAACCCCAAAATTTCCCTCCTTTCGGACCCCCGTTTCTTCGCGAAAATTTTCTTTTCTCGCTTAACAAGAGCCGCATCACGTGATCC…
737	1152	2	228	227	+	LINE/Tad1	GGAAATAAAGGCGGGAAAATGGCTAAAAATGGGCGGGGACGGGTGGAGGATAGGGGGGAACAACCCGGCGTCGTGGCCCCTGAGCGCACAGGGCTCCTGGAACTGACGACGCGAGATGGATTAAGACCCAACAAGAGGGGAGACTACACTCCCAAACCCTCATAACAGCTCTGGGGCTTACCCAGTGGGGACCTGGCATCATGCCCAGGTCCTTAACATTGTATTTA
738	1152	297	1166	870	C	LINE/Tad1	TCAACTGGTGCAAAACAGACTGGGACAAGTTTGCCTCGATGCTCCAACACCCCTCGGCCGAAAAACACCCCCTGTGGAGCTCCCTCCACTCAAACCCTTCCCCACAAAACCTTGACAAATGGGCGACTATGCTCCATGACATCATCCTCTCTGCGGCCACTACTTCCACCCCTCTGTTCCTGCTATCTCCCAGATCCAAACGCTGGTGGATGGCTGAGATAGAGCAAACTTGGAAGGCCATGTCCCATGCTCACTGGACATGGCAGAGATCCCACCTCCCTCACCATCACGCCAACTACCATTCCCTCTGAAACACCCACTTCCGACAAATACGACATGCAAAGGACTCGCTGTGGAAGGAATACCTATCACAGGCAGAGGGCACAGATATATGGGCTG…
739	1153	487	1696	1210	+	LINE/Tad1	CCACACCCCCACTGATCACCATGTCCTGGCTCCATCACCAGGTAAAGGAACAGCACACCATGGAATGGATTGCCTGGTATGACTCTACACCCAAACCTAAAATATATTCTGCCCCCCACCAGAGATGCCTCAATGCTGTCTACACCACCCTACCCTGCTGATAGTCTGCTGCAATCCTCAGCCACCAAACCAGCCATGGTTACTTCTTGGATTGCCTAGCCCACCCCCCCACTGAACATTACCCCAGTTGCAATTGCCCATGCCCACTGCACCCCCTCCCAAACCCCTAGACACCTCCTCTTATCATGCCCCTTCTACAGCTCAGCATGGACTGAAATGAGGAGCACACTGAAACTACACTGCAAGCAATGACTTACCCTGCAATTCATCCTGCACACC…
740	1155	381	1820	1440	C	LINE/Tad1	ATGCCCCCCTACCTCTGTGCTTGGACCCAAGCCTTTACAATGAACCGCACCCTTGCATTTTCCTTTTCCCAGCAAACTGAAGAACCCAAACCCATCTGCTGCAGCCTACCACAAGGATCCCCAGCCTCGCCCATCCTCTTCTTAATTTACGCTAATGCAATGCTCGAAATACAACATCAACCTAACCGCAAACTCAACATCTCCTATGTTGACGACACAAGTCTCCTCCAATCATCCCCCACCACCACCTTTGCCATCTGCCAACTCAAAGAATGATCAGAATACCACATTGAACAGGGCAAACACTTGGGCCTATGTTTCTCACCACCAAAATCAGATCTTCTCCACTGTCTCCCCAGAAATAGCAAAAACAAAGCAAAAGACCTCTCCCACCACCCA…
741	1157	1	852	852	C	LINE/Tad1	TTATCAAACAAACCTTATTTTCGGTTTCGGCATACCGAAATCCCCCCCCCCCCAAATTCCCCTATCGCCAGCAGCACTGGTTGTGGTGAACCCCCAAATTTCCCTCCTTTCAGACCCCCTTTCTTCACGAAAATTTTTTCTCGCTTAACAAGAGCCTCATCACGTGATCCTTCGCCCATCGCTTACGGAGTCCCCGATTTAGCGATGGACGCTAATCCGCCCCTCCCGCTAACCCCCTCGCTTATGCAAGTACAGGGTGACACCTGCAGCCCTACCACTCAAGTTCCAGCAACCCCAACCCACCGAATCATAACTATCGACCCCAACTCCGCCATGTCCACTGACCCCCTCGCCCGCGCAGACGCCCCTCACGCTGGCACTTCCTCCACCACTGCCCCG…
742	1157	895	1428	534	+	LINE/Tad1	TATCACTCGACTACCGCCTCCCCCTGCGCTCTCAATAACCACCTGGCAATCGCCAGATTTTCGAGCTGATTATTGTTCAGCGCCCCCAATTTACCTTTCCGCAACATTTTCAGTACAGGCCATCTCTTTTTCAACGTGTTACACGGTGAAAAGGAGATCTCCGGGCCCCTGAAAAAGTCCAGCGGCACGGTCATCATAATCCCCCCCCACAACAACCAAAAATCATCGATTTTCCGGCGGAATCCTTGTCGCACCCGCAAACACTACCTATCCCGACATTCCGATGCCTCCCCGCTCCTCCGTTGTGGAGAAACACCCTCTCCCTCCCGACAAACCGCCCACACACAACCTTGCTACCAGCAAACACGATAACGCAGAGCCGCAAGACATGCATGCATG…
743	1160	3190	7167	3978	C	LINE/Tad1	CTTGGTCGCCCCATCGATGGCAAGGGAAGTATCAAACTGGGCAATCGACGATGGGATCACCATGGGATCGGACCATGAAGTAGTCCACTTCCAACTGGACTCCCTCCACCCAGATCATCCAGCCTCGCCTACCACCACATGCCTGAATTGGTGCAAAACAAATTGGGAATCCTTTGTCACTGAGCTACAACACCTCTCCAAGACAGCCTATCCCTGCTGGACCTACTTCCGCGCAAACCCGTCCACCCGCAACCTTGACAAATGGGCAATCCGCCTCCACGACTGCATACAGAATGCAGCCACCACAGCAACACCCACCTTAACCCCCACACCACGATCGAAGAGATGGTGGATGGAGGAAGTAAGCAGGATGTGGAAGGCAATGACAGGTGCCCGAAA…
744	1160	7168	7515	348	C	LINE/Tad1	ACACTCAGTAACAGATGTCAGTGGAGACCCTGACCTCCAAGTGCTGGAAGTCAGCACCAACCTTATACCTGCCTTTTATGTCCTAAATATCTATAACGAACGTGACCCCCTAACGAGATCATACAGTATCCCTTGCTCCTTAACCTCCCTGACCCTCCCCCGGCGCTGCATTATCACAGGGGACCTCAATGCCCATCACCCCTTGTGGAACTCCCAGACGTGGAGAACAGCGCGAGCCGATGAGCTCGTAGAACCTATAGAAGACCACCAATTGCAATTGGTAAACATGCCGGATGTCCCAACCCATCACGACAGAGATAGCTCAGGGTCCTCAGTCCTTGACCTCAC
745	1161	40	404	365	+	LINE/Tad1	GGTCTGTCCCCCTCTGCAACCCATACACTTTACCATGCATGTGTTATTTCTAGGTCTGATTTTGGCTCTGAGATCTGGTGGACTGGACAGAAAGTCCTGGCCTGCAAACTACAAACACAGCAAAACTCTGTCCTCTGCTGCATAGTCAATGCATTTCATTCCACACTGACACTTGCCCTCCATAATGAAGCCGCACTCCCCCCTGTCTTGGTCTGCCTACAACACCAGCAACCCAAATACATCCTCCGCCTCCTTTCCCTACCCCCCTCACACCCTGTAGTTAGAAGATGCCCATCCGCCTTCCCCATCCCCAATCATTTCTACACCTCTATGTATGACCCTCACAAATACGACTGTCAGTGGCA
746	1163	50	725	676	C	LINE/Tad1	TCAGCGTGGACTTCGCGAGCAAAGTCAATGCTTTTCAGGCACTATTCCCACCCCCCCTGATCACCCCCCCCACCCAAATCCCAACCCATTCCCCCACTATCCCTTGGCATATATTTACCCCTGTGGAAATCCGTCACGCAATCCACTCCTCCGCCCCCAAGAAAGCCCCCAACCCAGACACCATCACCTTCGCGTGCCTCAGGAAAGCATACGATGCCATTCCCGAACACTTCAATGCACTGTACTCCACACTCGGTAAGAAGAGATACCACCCATGCTGTTGGCGTGAGGCGACCACCGTCATCATACTGAAGCCCAATAAGCCTGATTACAGTTCCATCAAAGCTTACCACCCTATCGCCGTCCTCAAATGCATGGGCAAGGTATTGGAAAAACTGA…
747	1163	792	1176	385	C	LINE/Tad1	AGAGAAAAAGGGGACCAGAGAGAGGCAAGGAGGGGAGATGGAGGGCAGGGGGTGGCAAGTGAGAGTAGCCAGGAGGGCACGGAAAAGGGGAGAGAGGTGAGGAGGTGAGGGGCACAGGTGGCCCGAAGGTGTGATCTGATTTCTGTTGTTTGGGAGGAAATCAAGGTGGAAAAATGGTTAAAAATGGAAGGGGAAGGTTGGAGGAAATGGGGGAGCGACCTGGCGAGGTGGCCTCCGAGCGCGCAGGGCTCCTGGAACAGATGACATGAGATGGATTGTGAACCAAATGAGACTTGGGGGACTACAACCCCACACATGAAAACTGCACTTGGGCATATCCCAGTGGGGACCTGGGGTAACAGCAAGGCCCCCAAGTATGTATTTA
748	1164	131	1318	1188	+	LINE/Tad1	GTGGAAGGACTATCTTTCTCAAGCCGAGGGGCCCGATGTATGGCAGGTGTTTAGGTACACAAACCCTTGACTTGCTCAGCTAACACCAAACCTTGGCACGATGATAAATGGCCAAGAAACAACATGTAGCTCCTTCGAAGCAAAAGTGGAAGCATTTCAAAAGCTGTTCCCCCCACTGCCACCACCACCGCCTCCATCCATCCTGCCCCCTCGCCGCGAGTTGATGTGGACAACCTTTAGACTGTCAGAGATAGAGACAGCAATTTTTTCCTCGTCGCCGAAGAGAGCGCCCGGGCCTGATGGACTTACATTCGCATGCCTGCACCATGCATACCTGGCCGCCCCCGAACACATGAATCACCTCTATGCCATGTTAGGGATGATAGGCTATCACCTGCG…
749	1174	6	307	302	C	LINE/Tad1	TGCCTGCGACCAGTGGTATCGTGGTGCCAATCTTTTCTCGCAGATCACACGATTGCTCTAGCATTCAACGGATGGACTGACAAGCAACGACCAGTGCAGACAGGCATCCCACAAGGTTCCCCTGCATCCCCCATTCTTTTCCTACTATACCTTCGCTCACTGTTCGACAAACTAGCTAAGACACACCCATATGCCTGGACTCCTAGTTACATTGACGACGTAGCGATCGTGGTCCAGGGATGCACCCACAAAGCAAACACCCGTGCACTCGAGAAAATCACAAATACAGCCTTTCGGTGGGC
750	1174	342	2066	1725	+	LINE/Tad1	ATCACTCGACTACCCCCCCTCCCCTGCGTTCTCAACAACCACCCGGCAATCGCCAGATTTTCCAGCGGATTATTGTTCAGCGCCCCCAATTTACCTATCCGCAACATTTTCAGCCCAGGCCCTCTCTTTTTCATCGCGTTACATGGTGAAAAAGGGATCTCCGGGCCCCTGAAGAAGTCCAGCGGACAGGTCATCAACACCCCACCCCACAAACAACAAAAATCGTCGATATTCTGGCGGAACCTTTGTCGCGTCCGCAAACAGTACTTATCCCGAAATTCCGATGCCTCCCCACTCCTCCGTTGCGGAGAAACAACCTCTCCCTCCTGACAAACCTCCCTCATGCATGCTCGCGAACAAAAAACGCGCTAGCGCAGAGCCGCACACTGTGCAGGAACA…
751	1176	201	4138	3938	C	LINE/Tad1	GCGGCGCCGGCAGTGGCAAGGGAAGTGACAAACTGGGCCGTCGATGAGGACAATGCCACCGGCTCCGAGCATGAAGTCGTACGCTTCCAGGTAAACACCTTACACCCCGACCTAGACACGACCCCCACCCAGCCACGCCTCAATTGGCGAAAAACCGATTGGGCCACCTTCACCATGACCCTCCAACACCTCTCCAATGCCGCCCGCCCCCACTGGACCCACCTCCGCCAACACCCCTCCCCAGCAAATCTTGATGAATGGGCAAATCTGCTGAGCGAAGTCATAAAAACCGCCGCCGAGAAATCCACCCCCCTGCTGACCGCCACCCCTCACTCGAAAAGATGGTGGACCACAGAGCTCGAACAAACTTGGAGGGATATGTCCCGTGCCCGGAGACGA…
752	1176	4143	6883	2741	C	LINE/Tad1	GACCACCCCCCCCCCCTGCCGTTCTCGACAACCACGCAGAAATCACGAGATTTTCGAGTGAAATCACGTTCAGCGCGCTCAATTTGCCTTACTGCAATGATTTCAGATCAGGCTCCCTCTTTTTCAGCGTGTTACACGCTTAAAAAGGGATTCCCGGGCCCCTGAAAGAGACCCGCAGTATGGCCACNNNNNNNNNNNNNNNNNNNNNNNNNNNNNNNNNNNNNNNNNNNNNNNNNNNNNNNNNNNNNNNNNNNNNNNNNNNNNNNNNNNNNNNNNNNNNNNNNNNNNNNNNNNNNNNNNNNNNNNNNNNNNNNNNNNNNNNNNNNNNNNNNNNNNNNNNNNNNNNNNNNNNNNNNNNNNNNNNNNNNNNNNNNNNNNNNNNNNNNNNNNNNNNNNNNN…
753	1177	3	2207	2205	+	LINE/Tad1	ATCTTCACTTCGTCACCCAAAAAAGCCCCTGGACCAGATGCCATCACCTTTGCCTGCCTCCAGAAGGCATATGGTGCCATCCCGGACCACATCAATGCTCTATATGCCATGCTCGGGGAGGTAGGCTAACACCCCCGCAGCTGGCAAGAAGTGACCACCATTGTTATCCCCAAACCCAATAAACCAGATTACAGCTCGGTAAAGGCATACCGCCCTATAGCACTACTAAACTGCTTAGGGAAAGTCCTGGAAAAACAAATGGCAATGCGGCTGGGACAAATGGCTGAGTCACATGACATTCTGCGCCATGATCAAATTGGAGGTCGCCCCAAGCGCTTGGCTATTGATGCCCCAATGGCGCTAATGCATGACATCGAAGTGAATGCAAGGCGCAAATTT…
754	1178	59	2508	2450	C	LINE/Tad1	CCCCAATCGAAACGATGGTGGACCCCAGAAGTCACCGCGGCAAGAAAGACAATGACCAAAGCGAGACGTAAGTGGAAATATAACCACGAAGAGAGATCTCACATAACCTACAAACATCCCCGAAATGAGTACCACAGGACCATCCACACGGCGAAAGATACCAAGTGGAAGGAGTATCTTTCTCAAGCCGAGGGGCCCGATGTATGGCAGGTGTTTAGGTACACAAACCCTCAACATGCTCAGCTAACACCAAACCTTCGCGCGATGACCAATGGCCAAGAAACAATATGTAGCTCCTTCGAAGCAAAAGTGGAAGCATTTCAAAAGCTGTTCCCCCCACCGCCGCCGCCACCGCCTCCATCCATCCTTGCCCCTCACTGCGAGTTGAAGTGGACAACC…
755	1178	2709	2943	235	C	LINE/Tad1	TTTGGGGGAAATATAGGCAGAAAAATGGCATAAAAAATGGGTGGGGAAGGGTGCAGGAAAGAGGGGAACGACCCGGCGAGGTGGCCCCCAAGCGAACAGGGCTCATTGGACTTGATGATGCTTATGTACCAAAAACCGACGAGAGTTCGGGGAATACAACCCCACAAACCAACACTGGCTCTGGGGACCTATCCCAGGGGGAGTCTGAGGTAACAGACAGACTCTCATACTTTGT
756	1184	22	1520	1499	+	LINE/Tad1	TCCCCCCTCTGCCCCGGCACCCTCTCCCTGCCATGACCACCCCCCTCTACCTTGGAATACATTCATGGCAAAGGAGGTATCGGCGGCAATCATATCATCCTCACTAAAGAAGGCCCCTGGCCCTGATGGCATCACCGTCCTGTGCCTCCACATGACCCTGCAAGTAATCCCCGAACAACTAACAGCTCTATATGCAACACTCGGTGAGGTAGGTTATCAACCGAAATGCTGGAGAGAAGCGACAACGGTCGTCATCCCCAAACCCAAAAACCTGACTACAGCTCAATAAAAGCCTACCGCCCAATAGCGCTGCTCAACTGCATGGGCAAGGTCCTCGAAAAACTCATGGCGACAATACTCAGCCAAATAGCGGAAAAATACGACCTTCTCCACAACGAT…
757	1187	1356	1728	373	C	LINE/Tad1	AGGGGGAATGTGGAGATGGAGGGAGGAGTGGTAGGGTGACTGGGGTCATGAAGGAGAGGTGGAAGGAAGGAGGTTGTAGGGGAGAGAGGTGAGGAGGGAAGAGGCAAGGGTGGCCCAGTGGTGTTATTTAATTTCTTTTGTTTGGGTGGATATAAAGGCAGGAAAATGGTAAAAAAAAAATAAAAATTGGGAGGGGAAGGGTGGAGGAAATGGGGGAACAACCCAGCAAGGTGGCCTCTGAGTGAACAGGGCTCCTGGAACAGATGACACAAGATGGACTAAAGCACAATGAGACTTGGGGGCTTATAATCCCACACCTGAAGATAGCTCTAGGGTAGCCCAGTGAGGAACTGAGGTAATAGCCATGTCCTTA
758	1187	1899	2117	219	C	LINE/Tad1	CACAAAGTTAAGTAATCTCCCCATGAGGGAGGACATACCTGTTATGCTGACTGCAGGCTGGGGGATGCTGCTGGACGAGGATGACAAGCATGTGGGTACCCCCACTGAATAAAAAAGAAAAAAAAAAAACAGAAAACAAAAAAAAAAAAAGAAGAGTGTAGAAGAGAGGAGAGGGGAGGAAGCATGGTGGGGGGAGAATGGGGATGTGAGGGCACAGAG
759	1190	383	1537	1155	C	LINE/Tad1	ATCACCTTGACACCACCATCCCTGACACTGCTGCCACCGCTGATCAAACCCTTCAAACCATCAATAAAGTTATCAAGGAATCAGCAGACATCATCCAACCCCCCTTCATCCTTGTACAAATGACCAACAACAACCATTTAGTGCTTACCACCAACCCCACCACCAAAGTATCTGGCTACACTCCCTACCATCAGATTATCGCCAATGCAACAAAGTCCCTCAAAACACTCGAAACCACAATCAACCAATGCTGGACCAAATTCCTCCTACACAATGTCCCAACCAATGACAACCTCTCTGCCATCAGATCTGAAAATAAAACCACCTACCCCTCCCTCCAACTTGCACAAAACCCCCACTGGCTCATGCCAATGGAATACTGCCTTAACAAATCAGCCT…
760	1196	13162	13632	471	+	LINE/Tad1	TTCACCACAACCATGCTGAAATCCACAGATCTTTGTGTGGCAGCGTTATCAGCGACCTCGCTTTACCTAGCTGAAGCATCTTCAGACCAGGCCTGCTCTTTTTCGTCATGCGAACAGTGAAAAAGAGATTTTGGACCCCTGAAGCAGCCCCTGGCTATGGACTTCATCACCACCCCTCCACAACAACCACCTCAATCATCCAACTCATTTCATTTCCTCCCTTCATCGATCAAAGTAAACCTATCCTGAAAAGCCAATGGCCCCATGCACCTCTGCTGCGAAGAAAAAACCAATCCCTCTTGACAAACCATCCCCGCCGGCACTCACCTCCAACTGACATGCTAACACAGAGCCACATACTCAATGCGATGTGCAAGAAACAATGCACCTCGACACTGA…
761	1198	2532	3003	472	+	LINE/Tad1	TATCACTCGACTACCGCCTCCCCCTGCGCTCTCAATCACCACCCAGCAATCGCCAGATTTTCGAGCGGATTATTGTTCAGCGCCCCCAATTTACCTTTCCGCAACATTTTCAGTCCAGGCCATCTCTTTTTCAACGTGTTACACAGTGAAAAGGAGATCTCCAGGCCCCTGAAAAAGTCCAGCGGCACGGTCATCAAAACCCCCCCCCACAACCACCAAAAATCATCGATTTTCTGTCGGAATCCTTGGCGCACCCGCAAACACTACCTATCCCGACATTCCGATGCCTCCCCGCTCCTCCGTTGCGGAGAAACACCCTCTCCCTCCCGACAAACCGCCCACACGCGACCTCGCTACCAGCAAACACGCTAACGCAGAGCCGCAAGACATGCATGCACG…
762	1207	41	1740	1700	C	LINE/Tad1	ACCCGGAAATCGCCAGATCTTCGAGCGGATTATTGTTCTGCACCCTCAACTTACCTTTTCGCAGCATTTTCGGACCAGGCCCTGTCTTTTTCGTCGTGCTACACGGTGAAAAAGAGATCCCTGGGCCCCTGAACAAGCCCTGTGCAATGGTCATCAACACCACAACCCACAATCACCAAAAACTATCAATTTTCCAGCGGAATCCCTGTCGCGCCCATGCAAGCTACCTATTCCGAAAATCCAATGCCTCCTCGCACCTCTGCTGTGGAGAAACAACCTCTCCCCCCAGACAAACCACCCATACGTGACCTCGCGAACAGCCAACATGCTAACGTAGAGCTGCACGCAATGCAGAGATGCCATGCATACCATGACACGATGCACGATGATGGGCAATAT…
763	1208	53995	54232	238	+	LINE/Tad1	TTTGGAGGAAATAAAGGCGGGTAAATGGCTAAAAATGGGAAGGGGAAGGGTGGAGGAAAGGGGGGAACGACCCGGCGTGGTGGCCCCTGAGCAAACAGGGCTCTTGGACATGATGACGCGAAACGGACTTGAAACGGAAGGAGGGAGCATACAGGCCAATATGCCAAACACGACGACTGCTCTGGGGCGCTTCCCAGCAGGATCCTGGGGTAACAACCAGACCTGAACTTTGTATATA
764	1210	53	967	915	+	LINE/Tad1	GTGGAAGGAGTATCTGTCTCAAGCCGAGGGGCCCGATGTATGGCATGTGTTTAGGTACACAAACCCTCGACATGCTCAGCAAACACCAACCCTTCGTGCGATGACCAATGGCAAGACACAACATGTAGCTCCTTCGAAGCAAAAGTGGAAGCATTTCAAAAGCTGTTCCCCCCACCGCCGCTGCCACTGCCTCCATCCATCCTTCCCCCTCGCCGCAAGTTGAAGTGGACAACCTTTACACCGTCAGAGATAGAGACAGCAATTTTTTCCTCGTCGCCGAAGAGAGCGCCCGGGCCCAATGGACTTATGTTCGCATGCCTGTGCCGTGCATACCTGGCCGCCCCCGAACACAGGAATCACCTCTACGCCACGTTAGGGACGGTAGGCTACAACCCGCGT…
765	1210	998	1212	215	+	LINE/Tad1	CCCACCACTCCGACAACTACCGATATCCCTCACCTGGATATGGCGCTGCACTCGAGAACAGTACACCGAAGACTGGGCTACCTGGTTTACCTCATCCCCTCAGCCACGCACGTACGCTGCTACACACCGCCACAAGATGGACGCAGCCTACACCGACCACCCCCGCTGGATATCAACTGCGATCCTGGGTCTTCGCACCAGCCACGGATACTTCC
766	1212	1	1428	1428	C	LINE/Tad1	CACCACACAGCAACCGCTGACCCCCCCTGCATTTTTCAACAACAACCTCAAAATTCCCGGCGCTGGCGACGGAAATCGCCTTAGCGCACACTGTTTACCCCGAATCCCGAATTCCAGGCCTGAATTCCTGTTTACCGTTGAGTTTCAGCAGAAAAACGCGATTCCGGGACCTCCGGACTGGTGAACGGGCCTTTCCATCAAGGCCGCCCCACATCCTGCCCTCCAGTCATCAAACAAACCTTATTTTCGGTTTCGGCATACCGAAATCCCCCCCCCCCAAATTCCCCTATCGCCAGCAGCACTGGTTGTGGTGAACCCCCAAAGTTCCCTCCTTTCGTTCCCCCTTTCTTTGCGAAAATGTTTTCTGGCTTAACAAGAGCCTCATCACGTGATCCTTCG…
767	1214	48	1627	1580	+	LINE/Tad1	TAAATAGATGACATCGCCCTTGTCGCCCAGGGCGGTACAAGGGAGGAGAATGCCCATGCCCTAGAAGCGGCTGCATGCACAGCCTTCACATGGGCACACAAAAACGCTGTAGCATTCAACAACTCCAAGTCGGAATTGCTGCACTTGCACTGCACTTGCAACGACACCCACTCAGCAGCCACAGATGTCCGCCTGTCAAACAGAACCATTGTAACCCCCGGAATGAAAGGTTGATGAAGGGACATTGTCTGGTGGATAGGAATTCATTTCGACTGCAAACTATCTTTTTCCCATCATGTAAACCTTAAGCTAATGGCTGCTGCCAGGTCCCTCAACACCCTCAACAGCCTCATCCAGCATGAGACAGGTCTGTCCCCCTCAGCGAACCATACCCTCTAC…
768	1220	64153	64882	730	+	LINE/Tad1	CGGACCAGGCCTGGACAAGCCCTCGCTAGATCATTGACGGGAGCCACGTCCTCTTCATTAACCAGTGCACGGTGACCTTGAGGTGGGTGCCGGCCCACAAAGGAGTAGCCGGGAATGAGATGGCGGACCAGATGGCAAAGAGAGCGGCGGAAAACTTGGAGGACGATGACCGGTTTTGAGGGAGTTCATGAGAGAGGCGAGCCTGACACACCTGAAAAGGAAGACGTCGGAGATCAGGAGGAAGACGACCAAGGCACTCAGTGGATCACGACCAGGACCGCGAAAAGCAAGGCGTACATCCCGCGGGACAAGACAGGAATCAGAAAGAATCTGAGGAACGAAAGAAAAGGAATAGCTTCCAGGTACTACCAACTCCTGACAGGACACGCGGTTGTCGCC…
769	1220	64954	65309	356	+	LINE/Tad1	ACAAAGGAGAAGAAACGAGACGACACCCAAAGATGGCTGATAGAAACGATAAACAACCGCCCAAATTACATCCCACCTACGCAACAAAAACCAGGCCCCGCAACCATGATGGCCTCAAAACGGCTGGCATCAAGATATTACCAGCTGAAAACAGGACATGCGGTTACAGGCGAGCATCTCAAACGCATAAACTCCATAAATGACGATAGATGCTGGTGGTGCAACAATGGCGAACGGCAATCAGTCAAACACCTCATAAAAGAATGCTGAACATGGAGAAAAGAACGCGAAACCCTAAAGAGAGAGTTCAACCAAGCAGTTTGGAATCACCAAGGAGTCGAACACATCTTTGCGGA
770	1220	65316	65801	486	+	LINE/Tad1	GAAGACAAAGCTCAGAGGAATTTTGGTGGTGTCAGGAAGGAAAGAGGCAGAATAGAGATCACCTCTTTAAAGAGTGCTCGAAGTGGAAACAAGAGATAAGAGAATTATGGAGAAGGGTTGCGAAGGACGTTGGCTGGCGGAAGGCCAAATGGAAGAAGATAACGCAGCTGTTTAAGGAGAAGAAAGCAGAGAAAGCGGTTTTGGGTTCATAAGGAAGACTGGTGTAGGCAGAATGAGCGGCATGAGTAGGCCGGAGGTAGAACACGATGAGAGCCAGGAAAGTGATGAGGAGAGATAGGGTGCAAACCCAGACATGTATTAGAAGAAGGCGGAAGTTGATTACAAAGGCGGAAAGAGGGGAAAAGGAAGGGAGCCACAGTTGATGCCACATAAGGCAGT…
771	1220	89953	90406	454	C	LINE/Tad1	CAGAGATTGGAAATAAAACACCAGAAAAAGAGATGGAACAAGCTGAAGAAGACAGAGACGTAGATTTGGGATGGGAAGATTTGGAAATGGATCAGGAAGCAGAAGAAGAACGGGAGGAACAGAGGAGAATGGAAGAACGGATAGCAGAGCCGGGAAGGTTTATTGCAGCGGTAGTAGCAGAAGCAGAAGCTGGCGGATATCTGTACGAGAATGGACAAATCGGGAAAGAAGAAGGGCACAAGGAATGAGTGCGGCGGAATTTTAAGGTGAAGAACAGACTGTAAATACCGAAAGGCAGCGAAGCCGACCCAACGGCGGCAAACGAGACAGAGGCGAATGTATAAACGGACAGACGAAGATGGAAAGGCACAAGCAAGACGATATGGCGGAAGACAATGT…
772	1222	73	2204	2132	C	LINE/Tad1	GCCGTCCTCTCTTGGTGCACATCTTTCCTAAACGAACGACCCAAAGCACTATCCTTTGATGGGAGAACAGATAGCCAGCACCCGATCAACACTGGTATCCCCCCAAGGGTCCCCGGCCTCACCGATCCTTTTCCTTCTATACCTCCACCCCCTCTTCGACGCCCTAAACGCAGCACACCCGACCCTCTGGATGCCAAGCTACATCGACGACGTCACCCTCATAACCCACGGTCGAACATGCGAAGAAAATGTCCGAGCCCTGGAGGCTGCAGCCCGCACGGCTTTCGCCTGGGTGCAAAACAATGCTGTCACCTTCAACGACTCCAAGTCGGAGCTCCTGCACTGCCAGCGTNNNNNNNNNNCTCACACCACAGACACCAATGTCCGCCTGCCCAACGG…
773	1223	72	531	460	C	LINE/Tad1	ACGAAACAGGACTGTCCCCCGCTGCTACAAGACTAATCTACCAGGCGTGTGTCCAGTCGAGAGCAGACTATGGCGCAGAGATATGGTGGAACCAACAAAAAGACCTCGCCCACACCCTCCAGAAACAACAGAACACTGCCCTCCGTAGGATCGTCAATGCCTTTACCTCCACACCGGTCTTGGCGCTCCACAATGAATCTGCACTCCCGCCTGTCACATTGCGCCTCGACAACCGCCAGCGGAAATACGCACTGCCCACCCTCACTTTACCCACTTCGCACCCGATTATCACATGCTGCCCAGTCTCATTCCCCGCACCAGGTGTCGAAGATGCCTCCATCAACTCGGACACCGAGTACGACCACCTGTGGCACACCGCAGGAACCGCCCCGTCCTGCC…
774	1223	562	2098	1537	+	LINE/Tad1	TATCACTCGACTACACCCCCCCCCCCCTGCATTCTCAACAACCACCTGACAATCGCGAGATTTTCGAGCGGATTATTGTTCAGCGCCCCCAATTTACCTATCCGCAACATTTTCAGCCCAGGCCCTCTCTTTTTCATCACGTTACACGGTGAAAAAGGGATCTCTGGGCCCCTGAAGAAGTCCAGCGGACAGGTCATCAACACCCCACCCCACAAACAACAAAAATCATCGATATTCCGGCGGAATCTTTGTTGCGTCCGCAAACACTACTTATCCCGAAATTCCGATGCCTCCCCACTCCTCCGTTGCGGAGAAACAACCTCTCCCTCTGCGGAGAAACAACCTCTCCCTCCTGACAAACCTCCCTCATGCATGCTCACGGACAAAAAATGCGCTAGC…
775	1230	1	1782	1782	+	LINE/Tad1	GGTGCAGTCTGTCGCTACGTACGGTATTGACATTAATGCCACTCGCCGATATCCCTCTCGTGACGTCGGCCGCATCACCAGCCTCCAACTGATCCTCACCCATCAAGCCCGAGCAATCACTGGATGTTTACGAACAACCCCCCTTGGCTTCCTCATGGCAGAGGGAGCCACTCACCCCGCTGAAGCCATAGTGCGAGGTCGGGAAGCGTGCTTTCGCTCACGAATTCTCACTCGTGTTGCACTGAAGCCAATGTCATCCCTTCACCAGGCCACCTCGACTGAAGACGTTATCCAACGCCTCACCCAACGTGCTGCATCACGGTGTGGATTCCCGGAGGTCGAAAACATATGCCAACCCTCACCATTGGGCCACAAACCTGGTGACATCATCATCGCTCT…
776	1230	3255	4023	769	+	LINE/Tad1	AAACCCCCCCCCTGTACCCAAGAACTTATCTTGCCCTGCACTAATCCCCAAGCACTCATGGAAAGTGAGAAGGTTCAAATAGGTATTTCCATGAATGCTGCCCTCAAGACTACCCCCAGACTGAAACAAATTGCAATCACTACCATCTAGAAAAACATCACTGGAAATGTTCTGCTGACCCCCTTACAAGACACCATTGCAGAGGACCTGATCCCCCATCTGAACCTCATCCATAATGCAGCAAGCAAAATCAACCCCACCTTGTTGCCCCCCTGCCTAAATAAAAAATGGTTCAAACTGGCCATCCATGGCATCCCAACAGACTACTACCCAGACATAGAGGAAGGAATTAAACACCTCCAGGAGGAAATCAAACACAACAATGGCATCATAATGACA…
777	1233	7894	9591	1698	+	LINE/Tad1	GAAGTACTGGTGACAGCAAGCACAGACTGCAGAGAATGAGCTCATCAAGTACGGCCACACACTGGCCCCCACTGCCCCCCCTCAACCTCCCAACCGACCATGGCAAGGCCCCCCCGCCTCCTCCATCCTCTTCCAAACCCCCCCACAAGGCCCCCAAAAAATGCCTCCACCCAAAACCAAGCCCAAAACCCAGAACCTATCCCGCAAACCCCCCAAACCCCAAGACATTGTGATCCCTTGCTCGGACCCCCAGGCTCTCCCTGACAGCGTCAAGGTAACCATTGGCATGGTGGTAAACACCGCCCTACAGGAAGCCAAGGCCCCGGCAATGCTCTCCATTATGATGGTCAGCAAAAACATAGCGGGAAACCTGCTGCTCACCCCCGCTACACACACCCT…
778	1233	9597	12934	3338	+	LINE/Tad1	CTGCCGTAGCGGTTACCAGGGAAGTATCCAACTGGGCAATTGACGAGGAGAACCCCACCGGCTCCGACCACGAAGTCGTCCTCTTCCAGATATCCTCCCTACACCCCGACGCGGAACACGACACACCAGAGCCCCGCCTTAACTGGCGCAAAACAAACTGGGGACACACTCACGTCCACCCTCCGCGAACTCTCTGCCAATAACCAACCCCTTTGGAGCACCCCGTGTGTGAACCCCACCGAATGCCAGCTCGATGATTGGGCAGTCCTCCTCCGCAATATTATCACCACTGCCGCAGCACAGTCTACCCCTGCACTGGTCCTCTCCCCACGATCAAAATGATGGTGGTGCCCAGAGGTGGAACACACGAGAGCAGCCATGACCAGGACTCGCCACAAG…
779	1238	65	1534	1470	+	LINE/Tad1	GTCCCGAGATCTGGTGGAAAGCGCAGAAAGGACTGGCTCGCAAGCTTCAAACACACCAAAACTCCGCCCTCCGACGAATACTCAACGCCTTCCACACGACTCCAACAATCGCCCTACATAATGAGGCTGCCCTCCTGCCTGTCTCAGTCCGTCTTAACCATAGACACCGCAAATACGTCCTCCATCTCCTGTCCCTACCCCCCTCCCACCCCGTAGGTAGAAGATGCCCCTCCTCTTTGCCCATCCCCAACCACTTTTATAAAGCCATGTGCGACCCTGCTGAATACGATCACCAATGGAGTACCTCCACCCACCCCCCCTCCCGCCTCATCGGAATGCTCCAGATAACAAACCGCTGGATCCTCCCGGACAACGAGATAAAAGACACGGCCCACCCAA…
780	1240	1	1216	1216	C	LINE/Tad1	CCCCCCTGCATTTTCAACAACCATGCTGAAATCGGAAGATCTTATTGCGGATTACTGTTCGGCAGCCCCGAATTACCTATTCGCAGCATTTCCAGACCAGGCTTACTCTTTTTCGTTGAGTTTTCATTGAAAAAGAGTTTTCGGGCCCCTGAGAAAAGCCCTGCGACAATCGCGGATTCCTTGTCGCTACCGCCAAAATACCTTATCCCGAAACTCCGATGCCTCCCCGATCCTCCGCTGTTCGAGAAAATAGGCCCCTTCCCCCCCGAACCAACCGAAACTCCGATGCCTCCCCGATCCTCCGCTGTTGAGAAATAGCCCCTCCCCCCCAACACAGCACCCCTTGGGCGCTCGCGACGAAGAAACACACTAACGCGGAGCCGCAAGCGCCTGACATGT…
781	1240	1239	2708	1470	+	LINE/Tad1	GCTGCGAGGTTCAACGCCCTCCAAAGCCTAGTACGTTATGAGACAGGCTTGTCCCCCTCAGCCACTCGTACTCTCTACATCGCGTGCGTCATTTCTTGGTCCGACTTTGGCTCTGAGATATGGTGGACAGGCCAAAAAAGTCTGCCAACCTCATCCAAACTCAACAAAACTCTGCCCTCCGTCGAATCCTAAATGCATTCCACTCAACACCGATAATCCCCCTCCACAATGAAGCCGCTATACCCCCTGTTTCGGTCCGCTTGCAACACTGAACCCGAAAATACATCCTGCATCTCCTCTCCATCCCCCCTCACCACCCTGTTGTGAAACGCTGCCCCTCCTCCTTCCCCGTGCCCCTACACCTCCACACTTCCATATGCAACCCCTATGGATACCACC…
782	1242	37	1296	1260	+	LINE/Tad1	GACACGAGACAACCCCCGGTTAACATCCTCATCCACCAGACAATCGACGACCTCCAAGACCTCGCAGTCCAAGTAACGCTACACTGGGTCCCCGGCCACAATGACATCGACAGCAATGAGGAAGCCGACCGCCTAGCAATATTGGCAGCATCCCAAGAACCCACCATCTCCCCCCCAGTATCCATCTCCTGGCTCTGTCGTCAGGTCAAAGAACAACAAACTGCAGATTGGACAACATGGTACAACGCCTCGCCCACACCCAAGACATACTGTGCCCCTCACCGATGACACTTGGACACTGCATACACCTCCCTACCCCGCCGACAATCCGCCGCAATCCTCGGCCTCCGAACTGGACATGGATATGTCCTGAACTGCCTTGCCCATCCCTGCACAGAC…
783	1243	8	1564	1557	+	LINE/Tad1	TGCAGCATCCAAGGCCACCCCGACCCTATCACCTACCCCGCGCTTGAAACGGTGGTGGAATGAGGAAATCCGCCACACCCGTCATGAAATGACCACTGCCAGGCGCCGATGGAAGCTCTCCCGACTCCCCACCCACCATGACAAATACAAGCGCCTCCGCAACAAACACTACCGGACAGTGCACTATGCCAAAGACTTGCTATGGAAGGAGTACCTTGCAGCAGTGGAAGGCCCGGACGTCTGGGCGGCGTTTCATTACATGAACCCACATCGCACCCAACTGACCCCGCTGGTCAAAGCCCTGGTAGGAGGCACAGAGAAACTGTGCATTGACTTCGAGAGTAAGGTTGAGGCCTTTCAAGCGCTCTTCCCGCCCCCCCCAACTACCCCCCAGACCAA…
784	1246	1	212	212	+	LINE/Tad1	GCAGCTGCCCTATCCATCCGCCACAGACACCTCGACACCTGCTGCTGAGCTGCCCCAAATTCCAGGCCTTGCACTGTACACTCAGGAAGGACCTCAGGGTAAAACAACACTCCCGGATCAACCTCAACACCATTCTGGACACCCCCTCCGGCACTAAGGCCCTTTCCACATTTATCTCTGCGACTAAGGTCACTACCTCGACCTGGGCACAC
785	1246	336	538	203	+	LINE/Tad1	GGGGCAGAGGGAGTACATGAGTCGAAATGAGGGGAGAGAGGGGCGCAGGGAAGGGGCAGAAGAGGCCGGCAGGAGTCATCCTTTTCTTTTGTACACGGTGGAAACAAAGGCGGGAAAATGGTCAAAAACATGGGCGGGGAAGGACAGGAGGATAGGGAGGAGCCCGGCGAGGTGGCCTCTGTGCAAGCAAGGCACTTGAAACA
786	1246	758	2480	1723	C	LINE/Tad1	AAAGCCTACCGCCCTATAGCACTCCTCAATTGCATGTGTAAAGTCCTCGAAAAACTAATGGCAACACAGCTGAGCCAAATGGCGGAGTCACACGACCTCCTGCAGGATGACCAAATTGGAGGTCGCCCTAAGCACTCGGCAATCGACACCGCAATCGTGATAACGCATGATGTCAAAGCGAATGCAGGGTGCTGCCTCATAATGTCATCGCTATTTTTAGACATTAGAGGTGCCTTTGACAACGTCTCCTCCACACGCCTTCTCGACACAATGCACAGCCTCGGCTGCCCCCATGCTGTCCTCTCCTGGTGCACATCTTGTCGAAATGGATGAACCACAGCACTATCCTTTGACGGGAGAACAGATAGCCAGCACCCGATCAACACGGGTATCCCCCAA…
787	1247	1	2021	2021	C	LINE/Tad1	TTGCAAGAACCAGCTATTGAACATAACAAACTACCGCCATCCCACCCGGACTTCCACCTCTTTACCCCTGTCCCAGAACGACCACTCTGTGCTACCTATGTACGATGCCTCCCCGCAATACAAACAGACATTGTCTTTACCCACTCCAATTCATTCCTTGGAACACGCATCTCATTCCCTACCAACCCTGCATTTACTATATACAATTTCTATTCCCCCGGACGACCACATGCAATAGCGAACCTCCTCCCACAATTTACCCCAGATCCCCAGCAATCATTATGGGAGATCTCAATGCTCACCATCCCTGGTGGGGTGGAACAGGCACCCTCAATGACAACCAAGTAATATCACACCGCGTAGAAACCGACTCCATCGCAGACTGGATGGAAGCACATA…
788	1248	1	414	414	+	LINE/Tad1	AACCTCGACAACATCCCCGCCATGCATAACCTCGACAACAACCGCCCTATGCGACCCCATCGACATCGACGCAGACATTGACCTTGAAGACGAAGAAGACTGCAAATCACACCTCCAACCAAGCGACAACTTCCTCAACACCATCGCCTCTATGATCTCAAAAAACACAAACGACGTACTCCGACCCATTGTACACTCCATCGACACTATCAACAAATGCCTCGACAGAATCGCCAAACCCAGCCCTTCCCCTCCGACACAGCCCCAACAACAACCCGCCACCAGACAAGCAACCCTCGCCAACTCACACCCCGATGACCTGCAGTACTGGAAAGCCCGATGCCAACTCCTGGAAAACACCCTACACCATCACAACATCGCCATGTACACTACCTCCCC…
789	1248	446	883	438	+	LINE/Tad1	CCCTGCATTATCAACAACCACACAACATTCTCTGGGTTTTCGGGTGAAATTCGAATCAGCCACCCCAATTTACCCCCCGTCGCCTTTTTCAGGCACGAATTCCTGTTCTCCGTTGAGTTTCAGCGCAGAAACAGGCTTCTGGAGCCCCCAGGCAGATCAGCGGCCATCTCCATCGCCGCTGCCCGCCCCCCCGCCCGCCACTCATCAAAGAAACGCCAAAATACTTTTCGCTGCATTAAATACAACCCGCCCGCAGCCCCACCACCCCCCTGCAGTGCCAGTTCTGGCGTTACACATTCCCCTTTCTCCCTCAATTCCCACCCTATGCGAAATCTTTTTCCTCGGTAACGCAGAGCCGCACGCACGTGACATGATGGCCTCACTAACGGACACCCCCGA…
790	1249	143	1081	939	C	LINE/Tad1	CCTGCCTCCCTGCATTCTCAACAACCACGTTGAAATCACCAGATTTTCGAGTGAAATCACATTCAGCACGCTCAATTTGCCTTACTGCATCGATTTCTGATCAGGCTCCCTCTTTTTCAGCATGTTACACTGTGAAAAAGGGATTTCCAGGCCCCTGAAAGAGACCCGCCATGCGGCCATCAACACCCCACCCCACAACCACCAAAAACCATCCTTTTTCCAGCGTAATCTTTGTCACGCCCACAAGAACAGACTATCCCGAAACCCCCATGTCTCCCCGCCCTCCCGTGGTGGAGAAAACCCCCCCCCTCTGGAGCAAAATGTCCCCCTCACAACACTGCAACAGAAAAACACACTAGTGCAGAGCCGCAGCCCCTGCAGAAACACGATGCGCACACC…
791	1249	1441	1690	250	C	LINE/Tad1	CTGATTTCTTTTGTTTGGGAGGAAATAAAGGTGGAAAAATTGTTAAAAATGGAAGGGGAAGGGTGGAGGAAATGGGGGAATGACCTGGCGAGGTGGCCTCTGAGCACACAGGGCTCCTGGAACAGACGATGCAAGATGGATTGTGAACCAAATGAGACTTGGGGGACTACAACCCCACACATGAAGACTGCTCTGGGGCATATCCCAGTGGGGACCTGGGGTAACAGCCAGGCCCTCAAGTATGTATTTA
792	1249	1708	1974	267	C	LINE/Tad1	TAGCGGCACCAGCTGTAGTGAGGGAGGTAATGAACTGGGCAATCGACAAGGAAAATGCCACCTGCTCTGATCATGAAGTGATCCACATGTGAGTGGACTCACTCCACCCCAACCTGGAGTTCAACACCCCGTTGCTTCGTCTTAATTGGAAAAAGACAGACTGGGACACCTTTCCGATTACCCTCCAACAACTCTCTGAAGCCAACAACACCCACTGGAGGCACTCATCCAGAAACCCCTCCTGAACAAACCTGGACTCCTGGGCAG
793	1249	2067	2558	492	C	LINE/Tad1	TACTACATGATATTTCGCTATGCCTTATGTTCATGGATTCGGAGGAGGGAGCGGAGCGGCATGGATAGGCGAGTGAGAGCAGCTGAAGGGGAGCGAGGACAAGGAAGAACGGAGGGTGCATGGCAGGGGTGCAGGGGAGAGGGGGAGCGGAGAGTGGAAAGTCGAAGAAGGAGAGCAGGAAGGGGAAGCATGCAGAGGGGGTGGGGCAGCGGAAGCCTGGAGGCATTTACCTTATCTTTTGTTCTTGTTTCTGTTTTTGCATTTGGAGGAAATAAAGGCACAATAATGGATTACATATGGGAGGGGAAGGGTCAAGGAAATGGGGGAACGACCCAGTCAGGTGGCCTCTGAGTGCACAGGGCTCATGGATCAGAAGACGCTAGATGGATGAAAGCTTTA…
794	1249	2599	4795	2197	C	LINE/Tad1	CTATCATTTGACTGGCAGACAGATAAACAATGCTCCATAAAAACAGGTATCCCCCAAGGTTCCCCGGCCTTGCCAATCCTATTCCTGTTGTACTTGCATCTGCTGTTCAATGGGCTAGCGCAGGAACACCCACACACATGGTCCCCCAGCTACATGGATGATGTAGCAATCATTGTACAGGGTCACACATGCAGGGAAAATGCGCGCACATTGGGACAAGTGACAAAAACAGCATTCAAATGGACTGATGCAAATGCAGTAGCCGTCGATGATGCGAAGTCTGAGCTCCTCCACTTCTGTGCATGTTGACTTAGTCACTGAAGATGATAAAGTTAAATTGCCGCATGGTACAGTAGTTGCACCGGGGACGAATGGGGGTGAAAATGATGTGGTACAGTG…
795	1249	4861	5239	379	C	LINE/Tad1	AAAAGGGGACCAGAGAGAGACAAGGAGGGGAGACGGAGGGCAGGGCGTGGCAAGTGAGAGTAGCCAGGAGGGCATGGAAAAGGGGAGAGAGGGGAGGAGGTGAGGGGTGCAGGTGGCCCGAAGGTGTTATCTGATTTCTTTGTTTGGGAGGAAATAAAGGTGGAAAAATGGTTAAAAATGTAAGGGGAAGGGTGGAGGAAATGGGGGAATGACCTGGCGAGGTGGCCTCCGAGTGCACAGGGCTCCTGGAACAGATGACGCGAGATGGATTGTGAACCAAATGAGACTTGGGGGACTACAACCCCACACATGAAGACTGCTCTGGGGCATATCCCAGTGGGGACCTGGGGTAACAGCCAGGCCCTCAAGTATGTATTTA
796	1249	5587	6055	469	C	LINE/Tad1	CCAAAACCCAAAACCGATGATGCCCCACACAAATGCAACCTTGACTCCGCCTACACCACCCTACCAAAGAAACACTCTACGGCTATCCTAGGCCTCTGTACGGGACATGGCTATTTTCTGGACTGCCTCGCTCACCCCCCCACAGCCCAATACCCTAACCGCTATTGCCCCTGCCCACTCCATCCCCTGCAAACCCCGAAGCACCTTCTCCTCTCATGCCCAACATACAACACCCATAGGACCGAACTATGGAGCATGCTGAAACTCCCCTGCTACTGCTGACTCACCGCACCGATGATCCTTCACATGACGACTGGGACCAAAGCCTTGTCTGCCATGATCTCAGTGACTAAGATCGCGACTGCCGAATGGGCACATGCAATGTTAAGTAAGCTCCCC…
797	1249	6665	7347	683	C	LINE/Tad1	TTTGAGGAAAAGGTCGAGGCCTTCCAAATGCTCTTTCCCCCACCCCCCCCCTGCCCCCATCCCTCCACCCTCCCCTGCCATAGGGAAATACCATGGCATGCCTTCTCACCTGGTGGAATCAAACAAGGCATTTTCACCTCTTCCCAATTGAAAGCCCCAGGTCCTGATGCCATCACCTTCAGCTGTCTTTGACAGGTATACCTGGCTGTACCAATATGGATCAATGACCTCCATGCTACCCTGGGCACAGTAGTTTATCACCCGCAAGGATGGCGACAAGCAATGACAGCAGTCATCCCAAAACTCAACAAACCCAACTATGCCAACCCTAAAGCATACCACCCAATTGCCCTGCTCAACTGCCTTGGCAAAACCTTAGAAAAATTGATGGCATCCCAT…
798	1249	7417	10094	2678	+	LINE/Tad1	CCCCCCCCCCCTGCGTTTTCAACAACCACTCAAAATTCTCTGGTGTTTCCGATGGCATTCGATTCAGCAACCTCAGTTTACCCCTCCCCACCTTTTTGAGACCTGTTTTCCTATTTTCCGTCAGGTTTCAGTGGAAAATTTGGATTCCAGAGCTCTCAGGCTGGTTAGTGGACCGTTCCATCAATGCCGCCCCCTGCTCTGCCAGCAACTCATCAATTAAATGGCAGAATATTCATTGCCACCCCAAAAAACACCCCCCCCTTAAATCCCCACCCCCCCAGCAGCCTTGGTTGTGGTGTTAAACCCCCCTCTTCCCCCCCTCCGGCTCCCCTTATTCATGCGACAAACTCTCCACCCGCTTATGCAGAGCCCCACTCACGTTACATGATGTCACACCTC…
799	1250	8956	10194	1239	C	LINE/Tad1	CCTACGTTGATGACACCAGCTTCCTCCAATCATCCCTCACCATCCCCTTTGCCATCTGCCGCCTCAAGGAACGATCAGAATATCACATCAAATGAGGCAAACACCTGGGCCTACATTTCTCACCACCAAAATCAGAACTCCTCCACTGCCTCCCCAAATACAGCAAACACAGAGCAAAAGACCTCTAGTGCCACCCACCACTCATCATCGACAACAAAACAATACAATCTAGCCGCAGTATCAAATATCTTGGCATCCACATCAACGAATCACTCACCTTCAAAAAACATGCAACCTCAGGTGCTGCCCAGGGAAGACCAAGACAAGGCTCCCTACTATTCCTCCGACACAGAGGCAATGGCATACCAACCCACATTGCATGACACCTCATCCTCACAG…
800	1253	176331	177071	741	C	LINE/Tad1	ATGACAACCAGCAAAAGGCTAGCCACCGGATACTTAGAGCTGAAGATAGGCCATGCAGTAATCGGAACACACCTCAAGCACATTAAGACGATCAACGACGGTAGATGCTGGTGGTGCCACTCCGGAGAACGCCAGGCAGTAAAACACCTAATGAAAGGATGTCGCCAATGGCGAAAGCTAGGGAAAAGTTGAATAAAGCCGTCAAAAATCACCTCTGGCAATAACAGGACCTGAAACACCTTTTCGCAGACCAGGGTGCCACAAAGTCAATACTAAAATATCTGGAAGAAACAGAAGTAGGAAACAGAATGCCTGAAAAAGACATGGAAAAAAGAGACGAAGAAAGAGATGAGAACTTGGGATGGGAGGGATTAATAAGGGAACCCGAAGAGATAGAGG…
801	1253	177097	177443	347	C	LINE/Tad1	ATGAGAGGAATGAGGTTGCCTCTAGATAATACCAGCTCCTCACAGGACATGCCGTCATCGCACCGTACCTGAAAGAGAAGCTGAAAAAGAGGGATTCCGATGAATGCTGGTGGTGCAAATCAGGGAAGAGGCAGTCCCGGGAGCATCTCTTCAAGGAGTGCTCCCGTTGGACCTCCGAAATTCGGGACCTCTGGAAACGTGTAAGCAGAGACGTAGGGTAGAGAAGGGCGCGGTGGAAGCCCATATAACGGCTGTTTAGAGAAGAGAAAGCTGAGGAGGCGGTATTGGAGTTTCTCAAGAGAACGGGGGTTGGGAAGATAAATGGCGCTGGCGGACCGAGAGCTGAG
802	1253	291365	291577	213	C	LINE/Tad1	ACAGAGGGAAGGCGGAGACCTCTGTGAATGCAAAATGTAGAGAAGAGATAGAATGAAGGCAACATGATGAGACAGTAGGTGAATGTAAAAAAGGAACAGAGAAAAGCAAAGAATACCACAGACAAAGGAGAAAGAAAAGTGGGAAAGAAGAAGTAAGAAAAGTAGAATTAGCATACCCTGATCTGGGGTCAAATAATATGACAAAATTAAAAA
803	1253	311032	313290	2259	C	LINE/Tad1	GCGGGCGTCATCCTTATGGATGTTAAAGGTGCCTTTGACCATGTATTCAGGACCAAATTGACGAAAAGAATGCACCAATTGGAGGCCGACCCCCAGCTTATTAGATGGACCCCTAGCTTTCTGACTGACCGTAAGGCGTCCATCCTGATAAATGGCCATGAGAGTGGAATGAAGGCTACGCAAACCGGAATACCACAAGGGTCGCCAGTATCCCCGATCCTATTCACCATCTAGATTTCCGGCATCTTTCAAGAAGTAGAAGACAACTGCCGAGGAGTGTACCTCTTCTTTGTCGACGACCTTGAATGGATAGTAACGGGAAGCACGATTACTGAGATCACCAATGGGTTAAAGAGATGTGCACTTTTATCTAAAGAATGGGCTACAAAAAATGCTGTA…
804	1253	313319	314635	1317	C	LINE/Tad1	GTAGAAGCAGAGGCAGAAGGCGAGAGGATAGAAATGGAGAAAATGAAGAGGCACGATGGCAGAAAGGAAGAAAGACAAGAATGGTCAACGTGTACGATGAAAAGTTGAAAACGAATCCTAATCATCGGAGAAGATGCATCATGGAGTTAGACAACTGGGACGATATCATCGACAATCGAACCATACTGGCAGGCGACTTCAATGCGTACAACCCCATGTGGGGATCACTGGAGACAACAAACAGTGCGCATATCATCAGGCTCACTGAGGATCACGACCTCCTCATCGCGAATAACTTTAAATTCACGAGATACGGCACGGACAGACAACGCCCATCGATAATAGACCTGACACTGTCAGCAGGGCCTAGAATAGACCACTGGGAGATCATTCAGAGGG…
805	1253	314812	315748	937	C	LINE/Tad1	ATTGAATCCGAATATGCAGCTACGGTAACACCAATTCGCTGGATTAAATCGCTAGAGCATTCCATCGACGAATGGAAGAACGGATCTCTCTTAACGACATGCACCTCCGTTGTCGCCCAAATCCAAGAAACAGACATCGCCAACGAATGGAAGAAAGCCGGAAGAATCAACATCGCAGGCCAGCATTATCGTTTGCAAGCATTCCAAGAAACTGATACAGCCACGGTTTGCAAGACATGCTCCAGACATGGATATGAACACTATTCCTGCCCTACACCAAGCAAACCTAGATGCGGAATCTGTGCTGGGGAGCACCTAATAGAAGAGCATAAATGTAAAGTAGGGAACTGTGGAACCCTAGCTAGAAGGTGCATACAACACGACAGCGTCTCATGCATC…
806	1253	316118	316377	260	C	LINE/Tad1	AAGACAATGGAGATCTTATCTTCCAGATTAATAAATTCCTGACAGAGAAGCAGGTGCCTGCGCACATCAGAATAGACTCCGCCAAATTGACAGCTAACGGCAGATGGAGCATTTACTCTAAAGCCAGAGCGAATGCCATAATGCTCGTCAACGCGATAATCAAAGAGTGGATCATTAGTGGAGCTCGAAAGGTGGATCCAGGAATTATCGACATCATTGAGATTGAAACATGGCCTCGCGTAAAGATTTATCAAATATCA
807	1253	336572	339061	2490	C	LINE/Tad1	TCGCCGGAGCCCTACTCACGGGTGTGAAAGGAGCGTTCGATCACGTTTCAAAAACACAATTAACAAAAAGAATAGAAGAGCTGGAGGCAGGCCTGCAGATAATTCAATGGACAAATAGCTTCATGTCAGATAGGAAAGCATCCTTGGTGATCAATGGACACGAAAGCGCCATGAAAGGGACAACAACTGGAATACCTCAAGGATCACCGGTATCACCCATCCTCTTCGCGATCTACATATCTGGAATCTTCGAAGAGATAGAAAAAGAAGTCCTCGGATCCATGGGACTGTCATTCGTGGATGACATATCATCGCTGGCTATAGCCAAAGACGTGACAGAGATAACGAACGTCCTGACATAATGTGCAAAAGCCGCGAAAGCTTGGGCAAGCAGAAACG…
808	1253	339066	343226	4161	C	LINE/Tad1	CGACTCCACCTCCACTTTTTAAAAAATTCAAGTACAAAACATCTTTTAAAGATCCAAAAAGAGACGTCCTCCCGCCTAACCATGACGGAGGACGCATCTAATCGTCCAGAAGATGAAGGAGGCCAGAGAGGCCCCGAAACTGGACCTGAATTCGGCGAATATCGCGAGAAACCTCAAGAAACCGCCACGGACTTCTCCGACCTTACCGACTTCGAAGACGAAGAAGAAGACGAAGAAGACACAATGGAGATCGAGAGAACAAAGAAACCAACCAATCCAGCCCTAAAATCGAAAATCCAAACCCCGAGATCATCGCAGCCAACCCCCCGGCCAACCTGGACCCAAGCTCAAGCCACCTGAACCCCCCGCTCCCGAACCCCCAAACCAACCCCAAGACCC…
809	1253	428488	429615	1128	C	LINE/Tad1	CCATGCCACCCATCTGGGATGAGGCCCAGGCCAAGAGACCACCCAAGAAATCCATGACCTCACCAGCTCCCTCCAAGACTACGACATCACGGTTACCATCCACTGGGTCCCAGGACACATGGAAATCCCTGGCAATGAGGAAGCTGACCGCTTAGCCAAACCAGTGACCTCCCAACCACCCCGAACCACAATCCCTCTTTCCCTATCATGGCTCTGTAGAAAAATCCACAAACAACACTCAACCAACTGGCTCTCCTAGTACAATGACTCCCCAAAGCCAAGGGCATATGCTGCACCACATCAGAGAAACCTCAATGCAGCCTACACAACCCTGCCACGAAAATAATTGACAGCTATCCTAGGACTTCATACTGGCCACAGGTACTTCCTTGATTGTCT…
810	1253	429683	431163	1481	C	LINE/Tad1	GTCCGTGCCATCATCCCCATCGGTGACACCACTGAGGTCTTTGATGCAGAACTCAGAGCCATACATGAGTGCCTCCTTGCCTGCCTATGGCACATCACCTACAACTGCCTATGAAACCGACACATCCACCTCTTCACCAACAACCAATCCGCAATCCTACGCACCTCCTGCCTCACCACCGGCCATGGCCAAGAGCTCGCCCGCATGATACATGAAACCACCACCTTGCTACATTCCCTCATGGTGCCAATAATGCTACATTGGGTAGCCGGACACACCGCCATTGCCAGTAATGATGAAGCCGACCTCCTGGTGAAAGCTGCCATGGATCTACCCCCCAACACTCCAATCCCAATCTCCCTGTCCTGGCTCTGGAGACAAATCCACAAACAATATGTT…
811	1262	118707	118918	212	+	LINE/Tad1	AGAACAAAAGAAGAAGTGTAACAGGCGGATGGTGAAACCCCCTGTAAATGCCGAAAGATATGAGAAAGATATACAGAAGGCGTCACGAAGAGACAGAGAAGAATGCAAGAACGGAAGAAGAAAATGTAAAGACAGACAGACGGTGATAGAGGAGAAAAGAGGTACAATTAGCATACCCCGAGCCGGGGTCCAATAATATGACAAAATCAAAA
812	1266	18	251	234	C	LINE/Tad1	CCTGGTTCTTCAGGTGCTCGAGGTAGGCACCGACTTAATCCCCTCGTTCTTTCTACTCAATATATACAATGAAAAACACCCCGAAAATAACATTTACACAATCCAAAGAGCCCTCACCCCCCTCCCCCTCCCCCGCAGGTGCATCATCACAGGTGATCCCAATGCTCACCATGCCCTGTGGAACCCCTCTGCATGTTCCCCCATTCGCCCGACCGAGGTAGTAGATCTCATTGA
813	1266	269	1140	872	+	LINE/Tad1	CCCCCCCCCCCCCGGCCATTGTCAACAACCATCCGGTAACCGCGAGATTTTCGACCGGATTATTGTTCAGCACCCTCAATTTACCTTTCCGCAACATTTTCAGTCCAGGCCATCTCTTTTTCAACATGTAACACAGTGAAAAGGAGATCTCCGGGCCCCTGAAAAAGTCCAGCGGCATGGTCATCAAAACCCCCCCCCACAACCACCAAAAACCATCGCTTTTCCGGCGGAATCCTGGTCGCACCCGCAAACACTACCTATCCCGACATTCTGATGCCTCCCCACTCCTCCATTGTGGAGAAACACCCTCTCCCTCCCGACAAACCGCCCACATGCGACCTCGCTACCAGCAAACATGCTAGCGCAGAGCCGCACGACATGCAGGCACGTGACGCGAAT…
814	1266	1161	1647	487	+	LINE/Tad1	CACCACACACCAACTGCTGACCCCCCCTGCATTTTTCACCAACAACCTCAAATTTCCTGGTGCTGCAGATGGAAATCGCCTTAGCGCACACTGTTTACCCCGAATCCCAAATTCCAGGCCCGAATTCCTGTTCACCATTGAGTTTCAGCGGAAAAACGCGATTCCGGGACCTCCGGACCGGTGAACGGGCCTTTGCATCAACGCCGCCCCACATCCTGCCCTCCGGTCATCAAACAAACCTTATTTTCGGTTTCGGCATACCGAAATCCCCCCCCCCAAATTCCCCTATCGCCAGCAGCACTGGTTGTGGTGAACCCGCAAATTTCCCTCCTTTCAGACCCCCTTTCTTCGCAAAAATATTTTCTCGCTTAACAAGAGCCTCATCATGTGATCCTTCGC…
815	1267	40	1501	1462	C	LINE/Tad1	CCGATGCTACCACTGTAGCCACTCAGGCCCTAGAAGCCATACACAACATCATCAGGGAATCACCTGACATCACATCACCCACCTTCATCCTAGCCTGCATCACTAGCAACAACAGACTAGTGCTTACCATCAACCCCACCACCAAGGCCAGTGAATACACACCATACCTGCAAATCATTACCAATGTTACCAACAAGCTCAACCCCTCTGATGCCAGGATCAACAAATGCCAGACTAAATTCCTCCTGCACAATGTCCCCACCCATGCCAACCCCCCTACCATCAGAAATGAAATCGAATCCACATACCCCTCCCTCTGCATTGGACAAGACCCACATTGGCTTGTACCTAGGGAACACAGGGCTACCAAATCTGCATCAACACTTGTTATCTCTGTCA…
816	1269	1515	1837	323	C	LINE/Tad1	AGAGGGACACAGGGGACGAAAGGGACAGGGAGAGAGGGGCGCAGACAGAGGACAAGGTCAGTCAGGAGGTGTTCATACTTTCTTATCTCGTGGAGGAAACAAAGGTGGAAAAATGGCTAAAAATGGGAGGGGAAGGGAGGAGGAAAGGGAGGAATGACCCGGCAAGGTGGCCTCTGAGCACACAGGGCTCTTGGACTAGACAACACACAGACAAACCTGACTGCAGGGACTTGGGGGGCTACACCCCCAAACAAGAAGCATGCTCTGGGGCAGATCCCAGTGGGAATCTGGGGTATCTGCCAGACTCCTAAATGTTGTATATA
817	1269	4954	6614	1661	+	LINE/Tad1	GCCGCCCCAGCGGTAGCCAAGGAAGTGTCAAACTGGGCCGTTGATGAGGAGAACCCAACCGGCTCTGACCATGAGGTAGTTACCTTGCACATTACCTCCCTACCCCCAGATGCAGAATACAGGTACCCAGAACCCCGCCTCCACTGGCACAAAACAGACTGGGACAAGTTCGCCTCCATGCTCCAACACATCTCCGCAGAAAAACACCCTCTGTGGAGCTCCCTCTGCTCGAACCCTTCCCCACAAAACCTTGGTGAATGGGCGACCTTGCTCCGCGACATCATCCTCTCCATGGCCACTACTTCCACCCCTCCGCTCCTCCTATCTCCCAGATCCAAACGCTGGTGGACGGCTGAGATAGAGCAAACTCATAAGGCCATGTCCCATGCTTGCCAGATA…
818	1271	380	764	385	C	LINE/Tad1	AAACCAAGACATTCTGCACCCCTCACCAATGGTGCTTGGACACCGCATACACCTCCCTACCCTGCCGACAATCTGCTGCAATCCTCAGCCTCCAAACCAGACATGGATACTTCCTGGACTGCCTTGCCCATCCCCCCACAGACAACTACCCCTCCTGATATTGCCCATGCCCAATGCACCCACCCCAAACCCCCAAGCACCTTTTCCTATCCTGCCCGATTTACAATGCAGCATGGAACAAACTGAGAAGCAAACTGAAAATCCAGAGTAACCAATGCCTTATCCTACACAACATTCTACACACCACCAATGGAGTCAAAGCCCTTGCCAACATGATCTCAGCGATGAAAATCATGACACCAGAATGGGTGCATACAACATTAAG
819	1271	1286	1582	297	C	LINE/Tad1	GCAATCCTGGGTCTTCGCACCGGCCACGGATACTTCCTCATCTGCCTAGCCCACCCTCCCACAGAAGCATACCCCTGCCGGCGATGCAGCTGCCCTATCCATCCGCCACAGACACCTCGACACCTCCTCCCGAGCTGCCCCAAATTCCAGGCCGTGCGCTCTACACTCAGGAAGGACCTCAGGCTCGAACAACACTCCCAGATCAACCTCAACACCATTCTGGACACCACCTCCAGCACCAAGGTGCTTTCCACATTTATCTCTGTGACTAAGGTCGCTACCTCGACCTGGCCACAC
820	1275	22526	23070	545	C	LINE/Tad1	CACATAAAGCACTGGCAGAATTACTGCGCAACACCAGAATAGGAACGCGAATGGATAGGGCGGAGAAAGAGGAAGAACGGCGGGGGCGAGATAGAGGAGGCTTCAATGGGCGGATAGATGGCCAATGGAACGGCGCGGAGGATGATGATCATGAGGATCAGGATAACGATGACGATTTTGACGTGGTGGAGACGGAATTGACTGAGGAAGCGATGGCGGACGCTGATGATTGGCTGTATGGGGAGTTTTGGGAACGAGTAGAGGTGGAACTAGGGGACGAGAATGGGGACGTATAGAGTTAGATTGGTTTTCTTTTGGAGATGTTAGAACGAGGTGTTTGGTTTATATTGGGGACGTTAGAACAGAGTGTTTGGTTTATATTGGGGACGTATAGAGAGA…
821	1277	18	893	876	C	LINE/Tad1	CATGGCCCCAACTGCGGCATCTGCGGCCAAAACCTCTCCACGGACGATCACGCTTGCAACGAGTGCCCCCAAGGTAAAGGTAAGGCTTGCAAGCACACCAAATACCACTGCAAGAACTGCGTAGATGCTGGCCTCCCCGATCTCGACCACCCCGGCTTCAGCAAACAGTGCCCCGTATGACTTCGCATCTTCAAAGAAGCCTGGACAGCATCACAGAACCCCGCCACAACCCCATCCAACCCCGCCAACAAGGACACTGAGATGAATGCCCATGTCTAGCTACAACAGACTGGCAACAACCATCAGGATAGTCTCCCCCAACGTGAACCGACAATGAACAGCACAGGACGCACTGCTGAATAGCGCACATCACACAGCTGATATAATCCTAATACAAGA…
822	1279	1	3299	3299	C	LINE/Tad1	TAGCAGTGCCAGCTGTAGTGAGAGAGGTAATGAACTGGGCGATTGACGAGGAAAATGCCACCGGCTCTGATCATGAAGTGATCCACTTCTGAGTGGACTCACTCCACCCCGACCTGGAGTTAACACCCCGTCACCTCATCTTAATTGGAAAAAGACGGACTGGGACACCTTTACGATTACCCTCCAACCACTCTCTGAAGCCAACAACACCCACTTGAGGCACTTGTCCAGAAACCCCTCCCCAACAAACCTGGACTCCTCAGCAGAAATGCTGCAAGACATCATCACCAAGGCAGCAACCGCCTCCACCCCATACCTCACCCCCTCACCCCGCTCCAAATGGTGGTGGACAGACGAAGTGACAACCACCCACAAAGCCATGACTCATGCCCACATGAC…
823	1279	3468	3829	362	C	LINE/Tad1	AAGGAGGGAACAGAGTGGAGCCGAGGAGTGTAGGATGAAGGAAAGGCAGAGACGATGGGGAGGGGAAGGGGAGAGAGGGGCGAGGGGCGCGGGCAAGGGTGGCCGAAGGAGTTTATCATGTCTTTTGTTGAGGAGGAAATAAAGGTGGAAAAATGGTTCAAATTGGAAGGGGAAGGGAGGAGGAAGGAGGGGAACAACCCGGCGAGGTGGCCCCTGAGGAAGCAGGGCTCTTAACTGAATTGGCGCAATGGAAACCAGGCTGGAGAGATTTGGGGAGCTGCAGCTCCAACACTGAAGCACGCTCTGGGGCTCATCCCAGTGGGATCCTGGGGTTACAGCCAGGGCCTCAAATGATGTACATA
824	1282	4901	5594	694	C	LINE/Tad1	GCGGCACCGGCAGTGGCTAGTGAGGTAATGAATTGGGCCATCGATGATGGGCAAGCTACCAGCTCCAACCACGAAGTACTCCACTTCCAAGTCACCTCATTACACCCAGATGTTGACACTGTAACAGGAATGCCCCGCCTGAATTGGCACAAGATGGACTGGGATGTCTTCACAACCACCCTTCAAAAGCTATGCAGTGCCTGACACCCCCAGTGGACCCACCTCTGATCTCACCCCTCTGCTTGTAACCTAGATGCTTGGGCAGCCCTCATCCGAGACAACGTACAACTCACCACAGAGGAGGCCACCCCACAGATTGTTCCCTCACCCCAGTCAAAGAGGTGGTGGATGAAAGAGCTGGATGAAACAAGGAAGGCTATGATGAGGGCACGCAGGAAC…
825	1282	5599	7851	2253	C	LINE/Tad1	TCATCAAGTACACCCCCGAACACACCATTCAATCCACCTCCAGTAGCAAGAAGGACATCTCCGATGCCCTCCTCAAGAAGCACCATGCCATGTCGACTGCCCACTCCATCCACACTGGTCCCAACTCTACTCCTGTTCCTGCCAGCATCAAGCGCCCCCATACTGACAACACTGCCATCACCACAAAGCCAACCACCATCGAAGACATAGCAGTGACCATTGAACAGTTAAGCAACAACCTCAGCACTGCTACAGACATGTTCTGCCACTCCCAAAAAGCTACCAATGACAGAGTAACCAAGGTTTATCAGGTAATGGACATGGACCACTCCACACTCCAAGCTTTCCACCACCTCCTTAGATGCCTAGCCCCTACCCTCCTGCCCCCTGATGATATCT…
826	1285	5050	7642	2593	C	LINE/Tad1	ATGCACACAAAGTGAATGACTCCATGTGCCCAACCAGAATCCAATACATGGAATTACTCAAGAACAAACCAACACCTGATGAATCCATGGAACCTGACCAGCTATGAACAACACAACAAAAATAAACACAGCATGTGTGCAGCTGCTGAGATGCACAAAAGGACATGCAACAACAACATCAGCATTATTTCCTTTTGCATCCAACCCTAATACTATTATTATCTCATTGCAAGAATCTTCTACCAAATACACTAAACTTGCCTCCACACACCCTGACTTTCACATGTTTACCCCTGTTAATGAATGACCCCTGTGTGCCACCTATGTCTGCTGACTGACTGGTGTACAAGCTGACATCAGCTTCACACATGCGAATTCTTTTCTTGGAACATGAATCAC…
827	1289	39	847	809	+	LINE/Tad1	ACTGACAAACACTCCTGCTCTCAATGCCCCAGCCAGGTAGGTAAATTGTGCCCCCATACAACATACAAATGCGCAAACTGCGTCGATGCTGGCAATGATGACACCAACCACACTGCATTCAACCCCCACTGCCTAATGAAAGCCAAAGCCATAAGGGACACATGGCAGAAAAACAGAACACCCAGCACCCCTGAAGACCCCCCAGCAGACATCAACATGACTACCCATGAATAGTCATGACCAACATGCAGCAACCATAGGTCTCATTTCCCATGATGTCAACCGAAGCACAACAGCTGTAACAGCACTGTTGAACAGTGCATGCCAGTCAGCCGACATCATCCTAATACAGGAGGTCAACATCACAGACCCCTGATATGAGGTTACCCACCCCAATTT…
828	1289	850	1082	233	+	LINE/Tad1	GGAGGAAATAAAGGCGGAAAAATGGTTAAAAATGGAAGGGGAAGGGTGGAGGAAATGGGGGAACGACCCGGCGAGGTGGCCTCCGAGCGCACAGGGCTCCTGGAACAGATGACGCGAGATGGACGGTGAACCAAATGAGACTTGGGGGACTACAACCCCACACATGAAGACTGCTCTGGGGCACATCCCAGTGGGGACCTGGGGTAACAGCCAGGCCCTCAAGTATGTATTTA
829	1294	205	667	463	C	LINE/Tad1	GCAGCTCCAGCGATAGCCAGGGAGGTGACAAAATGGGCCATTGACGTTGACATCGCCACTGGCTCAGACCACGAGGTTATTCGCTTTCAATTAGACTCCCTCCACCCCAACCTCGACACCACATCCACCACCCCCTGCCTGAACTGGCACAAGACAGACTGGGCAGTCTTCACAGACACCCTACAATGGCTGTCCGACACCACCTACCCCCACTGGACCGATCTCAGAGCCAACCCCACTGCACAACACTTAGATGAATGGGCAACCTTCTCTGGGATGCCATTCAATCTGCAGCCAAAGCCACCACACCGGTGTCGGTCCTCACATCCCACTCGAAGGGATGGTGCACAGCGGAACTGGACCAAACTGACAAAGCTATGACCAGTGCCTGTAGATGCT…
830	1294	673	963	291	C	LINE/Tad1	CCAACCTCATACCCGCCTTTCTCCTATTATATATATTCAACGAATACGACCCCCTCATAAAACTATACACCGTCCCCCGTTCCCCCACCCCACTCAGCCTCCCCCGGAGATGCGTCATTACAGGCAATCTCAATGCCCACCACCACCTCTGGAGCTCCCAGACGAGAAGAATAGCCTGAGCCACTGAGCTCGTGGAGCTAATTGAAGAACATGGCTGGCACCTCGTAAACATACCAGATGTCCCAACCTACCATTACAAGAATAGGTCCGGTTCGTCAGTCTTCGATCTCA
831	1305	625	1257	633	+	LINE/Tad1	GAATGGATCCAATGGTACGACGAGAGCCCGAAATTCAAAACATATGACGCCCCACACAAGTGATCACTCGATGAGGCATACACGGCGGTCCCACGAAAGATATCTACCGCTATCCTAGGATTGCGTACAGGACATCATCCTACCCAACCCGCGCCTGCCCCTGCCCACTTCACCCCCCTCAAACCCCCAAGCACCTGCTATTATCCTGCCCACTCTTTACCCCCCACCGCATAAACATACGAAAAGAACTGAAGCTTCCACGACACCGACAACTCAACCTACGGACCATCCTTCACACCAAACATGGAATCCACGCCCTGACCACTATGATCTCTGCAACGAAGATCGCTACGTCTGAATGGGCACACACGGTACTTAGTATGACCCCCGAGGAGACTG…
832	1307	502	3085	2584	+	LINE/Tad1	TCCCCCACCCCACCCCTACCACCCCAGCCAGGACAGAGCTACCGTGGCAGACCTTCTCGCCGGCCGAAATTAAGTCAGCCATTTACACCTCCTTGCCACGGAAAGCTCCAGGGCCAGATTCCCTCACTTTCGCCTGCCTCCATAAAGCATATGCAGCTATCCCGGAACACTTCAACAAACTATACAGCACCCTGCGATCAATGGGGTACCACCCGCAACCCTGGCGGCAATCCACCACGGTGGTCATCCCGAAACCTAACAAGCCCGACTACAGCAACCCCAAAGCATACCGACCAATTGCCTTGTTGAACTGCCTAGGAAAGGTTCTCGAGAAGCTGATGGCCTCGAGACTCAGCAGTATGGTGGAAACCCACGACCTCCTACACCCGGACCAGATCG…
833	1308	361	859	499	C	LINE/Tad1	CTCAACTGGCGCAAAACAGACTGGGACAAGTTCGCCTCCAGGCTCCAACACCTCTCTGCTGAAAACCACCCCCTGTGGAGCTCACTCCGCTCGAACCCTTCCCCACAAAACCTTGAAGAATTGGCGACCTTGCTCCACGACATCATCCTCTCCGCGGCCACTACTTCCACCCCTCCGCTCCTCCTATCTCCCAGATCCAATGCTGGTGGACGGCTGACATAGAGCAAACTCATAAGGCCATGTCCCATGCTCCCCGGACATGGTCGAGATCCCGCCTCCCTCACCATCACGCCAACTACTGTTCCCTCCGAAACATGCACTTCTGACAAATACAACATTGAAAGGACTCGCTGTGGAAGGAATACCAATCGCAGGCAGAGGGCGCAGATATATGGGCTG…
834	1308	1642	5015	3374	C	LINE/Tad1	CCTGGCATCACCGGCGATGGCATGGGAAGCAACAAATTTGGTGGTGGATGACACCCAAGCTACCGGCTCTGACCACGTGGTGATCTGCTTCGAGGTCACGATGACAATCCCACACCCCACCATAGTCACCCCACAACCCCGTCTCAATTGGGTGCGCATGGCCTGGGAAAGTTTCTCTGACACCCTCCGCTCGCTCTCGACATCTACATGATGACAATGGGAGTGACTGCAGCTTGACCAAACCCCGCCACACCTGGACAAATGGGCAGAGATGCACCGGGACATCATAACGACCGCAGCCGCACATGCCACACCATTCCTCAACTCCTCCCCCCGCTCCAAATGCTGGTGGACCCCCGAAGTCTCAGCAGCCCGGCAAAACATGCAACAAGCTCGCCG…
835	1308	5365	6651	1287	C	LINE/Tad1	GGTATGGCAAAGAATGCTGCCCTCCGCAAAGTCAATGCACCAATCAATGTCGCAGTCATGTCGGTTTGTCAGAACATGACAGGCAACCTCCTCCTGACCCCGGCTCCCCACAGCTCTGTACAGGAGCTCTTACAATACGCCGACACCATCTCCGCCACCATCAGCTCCGTCCACTCGTCCCTCCAACCTCCCCGCCTTACCGAAAAGTCGCACAAACTTGCTGTACATGGGGTGCCCATGGAACTATACCCGGACACCGAGGAAGGTATGCGGGCATTACAAGCTGATATCGAACAGTAGAACTATGTGGTGCAGCTCACCCAGCTCCCAAGGTACATGTCGCACCCCGACAAGAGAGCTGGGAAAGCTGCATCCAGCATGATCATAGCTGTCCGCACC…
836	1313	5	1229	1225	+	LINE/Tad1	TCATCCCCCTAGGAACCACCTCTGAAGTCTTCGACGTGGAACTCAGGGCCATAGCAGAATGCCTCCGCACCTGGCTTCAGTACATCAAACGACATCGCCTACACGACTGTTCAATCCACCTCTTTACCTACAACCAATCTGCCATCCTCCGCGCCTCGAGACTAGACAGAGGCCCAGGACAAGAAACCCCTCTCGACATCCTGCACACCACCACCGCCCTCCTCAGACGCTCGACCCCAGTGACCCTACACTGGGTGCCCGGCCACACAGACATCGAGGGAAATGAGGAGGCAGACCGCCTAGCAAAACTAGCGACCTCGCGCCCCCACCTCACCAACACACCCATCACCCCCTCCTGGCTCCAGTGTCAAATCATGGAACAACACTCCGCCGACTGGA…
837	1314	1	665	665	+	LINE/Tad1	CCCCTTCACCCCCCCCTTCACCCCCAAACACCCCCTTCTCGCCTGCCCCATCTTCCAAAGCCAACAAACTGAACTGTGACAAACACTGAAACTACACCGCAGCCGGCAGCTCTCACTACCACTCATCCTACACACACCTGCCAGTACCAAAGCTCTCTCCACCATGATCTCTAGCTCCAAAGTCGCAACAGTGGAATGGGCTCACTCAAAGTTAAGTAAGCAGCCCCTGGAGGAGGATCCCCTCGAATGTACGATGATGGGCTGGGGTACACTGATGACCGAAGAGGACGAGGATGATGCCATCACCACTAACATGTAAAAAAAAAAAAAAAAAAAAAAAAAAGAGGCACACAGGGGACGAACGGGACGGGGAGAGAGGGGCGCAGAGAGAGAACAAGG…
838	1314	793	1051	259	C	LINE/Tad1	TCTATAATGAATATGACCCTGCCACACAACTATACACCATCCCCTGCTCATTAACCCCCCTTGCCCTTCCCTGGAGATGCGTAATCACTGGAGACCTCAATGCCCACCACCCGCTGTGGAACTCCCAGACGAGGCGAACAGCGCAGGCAGAGGAGCTCATGGAACTAATCGAAGAAAACCAATGGCAATTAATCAACATCCCGGATGTTCCAACCTACCATGACAGAAACGGCTTCGGCTCCTCAGTCCTCGACCTCAC
839	1314	1675	2068	394	C	LINE/Tad1	TCCTCCGCCATCCTGGGACTGTGCACCAGGCATGGATACTTCTTGGACTGCCTCGCGCAGCCCCCCACTGATGCCTACCCATCAAGCAACTGCACCTGCCCGCTGCACCCTGCCCCAGAGTCCAAAACACCTCCTGCTGTCCTGCCTGGAGCACAGAACAGCCCGAGACACCTTACGCCAAGATCTCAGACTCGGTCGCCTCACTGGACCGCACCTGACCACAATCCTCCACACCACCACTGGATCAAAGGCCCTTGCTACTTTCATCTCTGCCTCCAAAGTTGCCACCACTGAGTGGGCACACTCAAGGTTAAGTACCTGCCCCCCAGAGATGGACCCCCTGCTTTCGTTGACCACTGGTTGGGGAACACTGTTGGACATAGACGAGAGCATG
840	1319	135	689	555	C	LINE/Tad1	GCTTATGCATGAAATTGAAACTAATGCAGGCAACAAGCTTATAATGTCATCACTGTTCCAGGATGTTAGAGGCGCATTTGACAATGTTTCCTCTACCCGCCTACTTCACACAATGTGACAGCTCGGCTGCCCCTGTGCAGTCCTCTCATGTGGCACCACTTTCCTTGCTAACAGAACTATGGCACTCTCCTTTGATGGCCACACTGACACCCAATGACCCATCAACATGGGGATACCCCAAGGTTCCCCTGCATCCCGGATTTTGTTCCTCCTATTCCTCTGCCCCCTCTTCGACACCCTTCAGTCTGCTCATCCAATGCTGTGAGTGCCGAGGTACATTGACAATGTTACCCTGGAAACACATGGCCGGATGTGGAAAGACAATGCCAACACACTCGA…
841	1319	758	1141	384	C	LINE/Tad1	AGAAGAAAAGGAGGCCGGTGAGAGGCAAGGAGGGGAGATGAAGAGCAGGGAGTGGGCAGTGAGAGAAGCCAGGAGGGCACAGAGAGGGGAGAGAGAGGAGAAGGGGAGGGGCACAGGTGGCCCGAAGGGATTCTGTGATTTCTTTTGTTTCGGAGGAAATAAAGGTGGAAAAATAGTTAAAAAAGGAAGGGGAAGGGTGGAGGAAATGGGGGAATGACCTGGCGAGGTGGCCTCCGAGCGAACAGGGCTCCTGGAACAGATGACGTGTGATGGATTATGAACCGAATGAGACTTGGGGGACCACAACCCCACACATGATGACTGCTCTGGTGCATATCCTAGTGGGGGCCTGGGTTAACAGCCAGGGCCTCAAGTATGTATGTA
842	1319	1217	1442	226	+	LINE/Tad1	GAAGAGTGCCACCAAGCATCGATGTACCGCTGGCACTCTCAGTCAATGTGAAAACAAGGGGTGCCTGACTCCCTCGTGGGCCTCCCTCGCCCATGTGAGCTGCTTGGCAACAGAAGCGCAGGCGAGCATTACCAAGTGGTGGATTCGCAATGGCTGGTGGGCAGCAAATGTTACTGTCCGCGGCAGAAGTGGGGGCTGCGGAAAGACCTCCAAACCATCCCAAAGC
843	1319	1448	3474	2027	+	LINE/Tad1	ATCATACAGCAACCGCTGAGCCCCCCTGCATTTTTTAACAACAACCTCAAATTTCCCCACTCTGCCGACGGAAATGGCCTTATCGCACACTGTTTACCCCGAATCCCGAATTCCAGGCCCGAATTCCTGTTTACCGTTGAGTTTCAGCGGAAAAACGCGATTCTGGGACCTCCAGACCGGTCAACGGGCCTTTCCATCAATGCTGCCCCACCTCCCGCCCTCCGGTCATCAAACAAACCTTATTTTCGGTTTCGGCATACTGAAATCCCCCCCTCCCCAAATTCCCCTATCGCCAGCAGCACTGGTTGTGGTGAACCCCAAAATTTCCCTCCTTTTGGACCCCCCTTTCTTCGCGAAAATTTCCTTTTCTCGCTTAACAAGAGCCGCATCACGTGATCC…
844	1319	3510	4876	1367	+	LINE/Tad1	TACTACACAAGGACCAAATAGGAGGCCGCCCACAGAGATCGGCAATTGACGCAGCGATGGTGCTGGTGCACAATGTCGAGATCGGGAAATCTCATGGACTGCTAACCTCCGCCCTCTTCCTCGACGTCCGGGGAGCTTTCGACAATGTCTCTGCGGAACGCCTACAACAAACACTATGCCAGCTCGGATGCCCGCGACCAGTGGTATTGTGGTGCCAATCTTTTCTTGCGGATCGCACGATTGCTCTAGCATTCGACGGACAGACTGACAAGCAACGACCGGTGCAGACAGGCATCCCACAAGGTTCCCCTGCATCCCCATTCTTTTCCTACTATACCTTCGCCCACTGTTCGACGAACTAGCTAAGACACACCCATACGCCTGGACTCCTAGTTACAT…
845	1319	4881	5233	353	+	LINE/Tad1	GGAGGGGGGTGCGTGGGGGAGAGCCGAGGAGTGGAGGATGCGGACGGAGAGAGGAGAGGCGGGGGGGGCGGTGGCCCGGCGGAGTTATCTTTTTCTTTTCCTTTCTGTTATGTCTTGGTTTGTGGTGGAAATAAAGGCGGGAAAATGGCTAAAAATGGGCGGGGAAGGGTGGAGGATAGGGGGGAACAACCCGGCGTGGTGGCCCCTGAGCGCACAGGGCTCCTGGAACTGACGACGCGAGATGGATTAAGACCCAACAAGAGGGGAGACTACACTCCCAAACCCTCATAACAGCTCTGGGGCTTACCCAGTGGGGACCTGGCATCATGCCCAGGTCCTTAACATTGTATTTA
846	1319	5308	5673	366	+	LINE/Tad1	ACGTACACCGCTACACACCACCACAAGATGGACGCAGCCTACACCAACAACCCCCGCTGGATATCGACTGTGATCCTGGGTCTTCCCACCGGCCACGGATACTTCCTCAACTGCCTAGCCCACCCTCCCACAGAAGCATACCCCTCCCGGCGATGCAGCTGGCCTATCCATCTGCCACAGACACCTCGACACCTCCTGCTGAGCTGCCCCAAATTCCAGGCCGTGCGCTCTACACTCAGGAAGGACCTCAGGCTCAAACAACACTCCCGGATCAACCTCAACACCATTCTGGACACCCCCTCCGGCACTAAGGCCATTTCCACATTTATCTCTGCAACTAAGGTCGCTACCTCGACCTGGGCACAC
847	1319	5792	6151	360	C	LINE/Tad1	AGTGGAGGGGGGTGCGTTGGGGAGAGCCGAGGAGTGGAGGATGCGGACGGAGACAGGGGAGAGAGGGGAGGCGGGGGGGTGGTGGCCCGGAGGAGTCACTTTTTCCTTTGTTCTGTTTTTGCTTTGTGGAGGAAATAAAGGCGGAAAAATGGCTTAAAAATGGGAGGGGAAGGGTGGAGGAAATGGGGGATCAACCCGGCGAGGTGGCCTCCGAGCGCACAGGGCTCCTTGGATCTGATGACGCTAGATGAAAAACTGCATGGTGAGACTTGGGAGACTACACTCCCACCCACATTGACAGCTCTGGGGCTTACCCAGTGGGGACCTGGCATCACCCCCAGGTTCTCATCATTGTATTTA
848	1321	164	526	363	+	LINE/Tad1	GAAGGGAGGTGAGGAGTTGAGGAGAACGGTTGGAGTAGAGCGACGGGGTAGGGGAGAAAGGGGCGAAGACAGAGGCGGAGACGGCCGGGAGGTGTTACCATTTCCTTTTGTTATGTTATTGCGTTTGGGGGAAAGTATAGGCGGAAAAAATAGGCATAAAAAAATAGGGTGGGGAAGGGTGGAGGAAAGAGGGGAACGACCCGGCGAGGTGGCCCCCGAGCGAACAGGGCTCATTGGACTTGATGATGCTTATGTACCAAAAACCCACGAGAGTTGGGGGACTACAACCCCACAAACCAACACTGGCTCCGGGGGCCTATCCCAGGGGGAGTCTGAGGTAACAGACAGACTCTCATACTTTGT
849	1322	1	1027	1027	C	LINE/Tad1	CCCCCCTGCATTTTCAACAACCACACTGAAATCGGAAGATTTTATTGCGGATTACTGTTCGGCAGCCCCGAATTACCTATTCGCAGCATTTCCAGACCAGGCTTACTCTTTTTCGTTGAGTTTTCATCGAACAAAGAGTTTTCGGGCCCCTGAGAAAAGCCCCGCAAACACGGTTCCATCAACACCGCACCCCACACACATCAAAAATCATCATTTTAATCGCGGATTCCTTGTTGCTACCGCAAAAATACCTTATCCCGAAACTCCGATGCCTCCCCGATCCTCCGCTGTTGAGAAACAGCCCCTCCCCCCTGACAAAGCACCCCCTCGGGCGCTCGCGACGAAGAAACGCACTAACATGGAGCCACAAGCACCTGACGTGTCCGCCGCGGAAATGCA…
850	1322	1055	1561	507	C	LINE/Tad1	CCTGGCAGCCCCATCAATGGCGAGGGAAGTCTCGACTTGGGCTATCAATGATGGGTTAGCCCCAGGTTTGGACCACGAAGTAATCCGCTTCGAAATAAACTCTCTTCACCCGGGTCACACCGCCCCCCCCAGCAACACCTGCCTGAACTGGAAGAAGACGGATTGAGAATCCTTCGCCACAGAGCTACAACGCCTCACCGAAGTCACCGACCCCCGGTGGACCCACCTCCGAGCCAACCCCTCTGCCAGCAACCTAGATGAGTGGGCCGCCCTCCTGCAAGCCTCCATCCAAACAGCTGCCACAATGACAATGCCCACCCTCACCCCCACCCCCCATTCGAAACAATGGTGGATGGAGGAGGTATGCAGAACACGCAAGGAAATGACAAGCACAAGAAA…
851	1322	1562	1848	287	C	LINE/Tad1	CTTATACCCTCATTCTATCTCCTTAATGTATATAACGAACGAGACCCCCAAACAAAAATATATAGAGTCCCCCGCACTCTAACCCCCCTCCCCCTCCCCTGCCAGTGTGTGATCACAGGTGATCTCAACGCCCACCACCCCCTGTGGAACTCCCACATATGGAGACCAGCATGAGCTGATGAGCTGGTGGAACTAATGGAAGACCACCACTGGCAACTGGTGAATGTCCCAGATGTCCCTACTCACCACTACAGAGACGGCACCACGTCCTCAGTCGTGGACCTCAC
852	1325	1	2210	2210	C	LINE/Tad1	CCCCCCCTGCATCTCAACAACCACCTGGAAATCGCCAGATTTTCGAGCGGATCATTGTTCGGCAGCCAGAATTTACCTTTCCGCAGCGTTTTCAGACCAGGCCCTCTCTTTTTCGTTGAGTTACACGGTGAAAAAGAGATCTCCGGGCCCCTGAAGAAGCCCCGCGCATTGGTCATCAACACCACCCCCCACCACAATCAAAAATCATCAATTTTCCCGCGGAATCCCCGTCACGACCGCAAAAACTACTTATCCTGAAATCCCGATGCCTCCTGGTGCCTCCATTGTGGAGAAACCCCCTCTCCCTCCTGACAAACAACCTCTCCGGGCGCTCGCGAAAGGAAAACGCGCTAACGCAGAGCCGCACGAAGCGCGCGACGCGTCAGATGCCGAGATGCA…
853	1325	5568	6651	1084	+	LINE/Tad1	CACCACACAGCAACTGCTGACCCCCCCTGCATTTTTCAACAACAACCTCAAATTTCCTGGCGCTGCCGACGGAAATCGCCTTAGCGCACACTGTTTACCCCGAATCCTGAATTCCAGGCCCGAATTCCTGTTTACTGTTGAGTTTCAGCGGAAAAATGCGATTCTGGGACCTCCGGACCGGTGAACGGGCCTTTCAATCAACGCCGCCCCACATCCCGCCCTCCGGTCATCAAACAAACCTTATTTTCAGTTTCGGCATACCGAAATCCCCCCCCCCCCCAAATTCCCCTATCGCCAGCAGCACTGGTTGTGGTGAACCCCCAAATTTCCCTGCTTTCGGACCACCTTTCTTCGCGAAAATGTTTTCTCACTTAACAAGAGCCTCATCACGTGATCCTT…
854	1327	30	784	755	+	LINE/Tad1	CAATCAAACCCAATGGGCAACACAACAGAGGTCTTCGACACCAAGCTTCGAGCTATTTACAAAGCTCTCCTGACCACCCGATCCTACATCACACACCGCAATCTCCAGCGCCAGCAGATCCACCTCTTCACCGACAATCAATCGTCAATCCAATGGGCCGCCCATCTCAGATGAGGCCGAGGCCAAGAGACTGCCCAAGAAATCCATGACCTCACCAGCTCCCTCCAAGACTACGACATCACGGTCACCCTCCACTGGGTGCCAGGACACACAGCCATCCCCAGCAACGAAGAAGCCGACTGCTGAGCCACACAAGTGACCTCCCAACCACCCCGAACCACAATCCCTCTCTCCCTATCGTGGCACTGTAGAAAAATCCACGAACAACACTCAACCAAC…
855	1327	2335	2587	253	C	LINE/Tad1	GGGTAGGGAGGTGATGGAAAGATGGAACTGACATGGGACAAAGGGGACATAGAGGGAAGAGGCTGTGGAGTTGGGTACGGAGTTGGAGAGATGCTTTCTTTTCTTTGTTTCATTTGCTTTAAAGCTTCGCAAAGGAAATACAGGTGGTCTAAAGAAGAGAATAAGGGTGGGGAAGGGAGGAGGAAAGAGGGGAACCCGGCGCAGTAGCCCCTGAGCAAAATAGGGCTCTTGGCAGATACGTCGCGGTATGGAC
856	1330	41435	41694	260	+	LINE/Tad1	AAGCGGAGGCCGGCGGTTACCTCGAGAATGGATAGAGAGAGAATGCATAAAAGGAAATGAAGAAGTGTGACAGACGGAGTAGTGAAACCGAACTGTAAATGCCGGAGGATAACGAAGAAGTTAGACTGAAGGTGACATGAAGAGAAAGAAGGCGAATGTAAAAGAGAGAACAGAAGTCAAGAGGTAAAGACAGAAGAAGATAGAGAGAGAGAGATTAGCATACCCCGATCTGGGGTCTAATAATATGACAAAATCAAAAA
857	1330	133105	133701	597	C	LINE/Tad1	TCGCAGGCGCCTTAGTAATGGATGTCAAGGGAGCGTTTGACCGCGTCTCTCGGACAAGATTGACAGCCCGGATGCAACAACTCAAAGCCGACCCCCAGCTGATACGTTGGACAGATAGCTTTATGAAAGACAGACGAGCATCCCTCGTCATCAACGGCCATGAAAGTGCGATGAAACCGATAAGCACAGGAATCCCCCAAGATTCCCCAGTCTCTCCGATCCTATTTGCGATCTTCATCTCTGGCGTATTCGACGAAGTGGAAGCAAAAACAGAAGGTGTGAGCATCGCATTCGTCGATGACACCTCATGGATGGCCACCGGAAAAAACGTCACAGACATTGGAACAACATTGGAACAATGCGCGAAAGTATTCAAGGTGTGGGTACGTCGGAATGCGG…
858	1334	755	1486	732	+	LINE/Tad1	CCCCCCCTGCATCTCAACAACCACCTGGAAATCGCCAGATTTTCGAGCGGATTATTGTTCGGCAGCCTGAATTTACCTTTCCGCAGCGTTTTCAGACCAGGCCCTCTCTTTTTCGTCGAGTTACACGGTGAAAAAGAGATCTCCGGGCCCCTGAAGAAGCCCCACGCATTGGTCATCAACACCACACCCCACCACAATCAAAAATCATCAATTTTCCAGCGGAATCCCCGTCGCGACTGCAAAAACTACTTATCCCGAAATCCTGATGCCTCCCGGTGCCTCCGTTGTGGAGAAACCCCCTCTCCCTCCTGACAAAGAACCTCTCCAGGCTCTCGCGAAAGGAAAATGCGCTAACGCAGAGCCGCACGAAGCACGCGATGCGTCAGACGCCGACATGCA…
859	1335	16676	17138	463	+	LINE/Tad1	TTCTACTGTCCGAAATACTTCAAAGACCGTCTGACCGCTGCTAAAGCTAGCCTATACCGCTTCATATAATAGCATTCTTATATCGCGACATAGCCTACAAAGCACTGGCAGAATTACTGCGCAACACGAGGATAGGAACGCGGATGGATAGGGCAGAGAAGGAGGAAGAACGACGAGGAAGCAGAGAGTTCGATGGGCGCGTGGATGGCATTTGGGACGGGGCAGAGGATGATGACGGGAATGGGAATAGGAATGGCGATGAGGATGACGATGAGGATGACGATGAGGACTTCGACGTAGTAGAGACGGAGTTGTCTGATGAAGCGATAGCGGACGCTGATAATTGGTTCCATGGAGAGTTTCGGGAGCGCGTTGAGGCGGAATTAAGGGAAAACGATG…
860	1335	85496	86287	792	C	LINE/Tad1	GCTTCTGGATGGACTCGGCATTGAATTTTCACGACCACGTCACGAAAAGAATGGCAAAAGCAAGACAAAGAGAATCCAAAATCAAAAGACTCCACAGCAAATATGGAATGACCCCAAAAACGTCAGGCCAATGATGACAGCCACAGTTCAAACATCGGCTCTCTTCAGCGCAGAAATATGGTGGAGAAACCAAAAAAACGAACCGAGCAACCCCAAACCATGATAAACTGAGAAGCAAGAGCAATCACAGGGTGCATGAAAACCACCCCAATAGGTCCTCTAATCGCCGAGGCCAGCTTAATACCAGCAAAAACCCTTCTGGACCATCGCCAACGACGATATGCCGAACGCGTCATCGGTCTCCAAAAGGATCACTGGGCCAAACAAGTCATTCCCAAT…
861	1337	1	405	405	C	LINE/Tad1	CCCCCCTGCATTTTCAACAACCACGCTGAAATCGGAAGATTTTATTGCGGATTACTGTTCGGCAGCCCCGAATTACCTATTCGCAGCATTTCCAGACCAGGCTTACTCTTTTTCGTTGAGTTTTCATCGAAAAAAGAGTTTTCGGGCCCCTGAGAAAAGCCCCGCGAACACGGTTCCATCAACACCGCACCCCACACACATCAAAAATCATCATTTTAATCGCGGATTCCTTGTCGCTACCGCAAAAATACCTTATCCCGAAACTCCGATGCCTCCCCGATCCTCCGCTGTTGAGAAACAGCCCCTCCCCCCCGACAAAGCACCCCCTCGGGCGCTCACGACGAAGAAACGCACTAATGCGGAGTCGCAAGCGCCTGACGCGTCCGACGCGGAAATGCA…
862	1337	3018	3251	234	C	LINE/Tad1	GAAGGTAGGGAGACTGGTGGGTCCAGCAGTGAGGAAAACAGGATGGAGATAGAGGAATGGAGAGAGAGGAGCATTGAGAAGAAGCAGGAGGGGCCTGGAGGTGTTTACTTTTTCCTTTGTTGTGGTGGATATATAGGTGGTAAAATAGATAACAATGGGAGGGGAAGGGTGAAGGAAAGAGGGGAACCTGGCAAGATGGCCCCTGTGCAAGCAGGTCACTGGAACAGAAGATGC
863	1337	3750	4103	354	C	LINE/Tad1	AGGGGAGATCAAGAGCAGGGAGTGGCAAGTGAGAGAAGCCAGGAGGGCACAGAGAGGGGAGAGAGGGGAGGAGGGGAGAGGCACAGGTGGCCCGAAGGGATTCTCTGATTTCTTTTGTTTGGGAGGAAATAAAGGTGGACAAATGGTTAAAAATGGAAGGGGAAGGGTGGAGGAAATGGGGGAATGACCCAGCGAGGTGGCCTCTGAGGGAACAGGGCTCCTGGAACAGATGACGCGAGATGGATTATGAACCAAATGAGACTTGGGGGACTACAACCCCACACATGATAACTGCTCTGGGGCATATCCCTGTGGGGACCTGGGGTAACAGCCAGGCCCTTAAGTATGTATTTA
864	1337	4875	5524	650	C	LINE/Tad1	CCGATAATGCTACACTGGGTACCCAGACACACCACCATCACTGGTGATGATGAAGCCGACCTCCCGGCGAAAGCCACCATGGATCTACCCCCAAACACTCCGATCCTCATCTGCCTGTCCTGGCTCCAGAGACCAATCCATGAACAATATATTGCCGACTGGGCCACATGGTACAACTCTGAACCAAAACCCAAATCTTACAATGCACCTCACTGCTGCTGCCTTGACCATGCATACACCTCCCTGCCATGCAAACTCTCCACAGCCATCCTTGGTCTTCGCACAGGCCATGGATAATTTTTGGACTGCCTCGCACACCCCCCCAGTGCCCACTACCCTTCCCGCTCATGCCCCTGCCCACTCCACCCCCTGCAGACCCCTCAGCTCCTCCTCCTCTCC…
865	1337	6944	9583	2640	C	LINE/Tad1	GCAGCACTGGTGGTAGCCAGGGAAGTGACAAACTGGGCCATTGATGATGGTATCACCACCCGTTCAGACCATGAGGTCATTCACTTTCAATTAGTCTCCCTCCACCCCGATCTTGACACTGCATCCACCACCCCCCAACTTAACTGGCACAAGACAGACTGGAAAGTCTTCACAGACACTCTGAAACACCTGTCCAACACCACCTACCCACGGGGACCCATCTCAGAGCCAACCCCTCTGCATGACACTTAGACGAATGGGCAGTCATTCTCCAGTACATCATTCAATCCACAGCCAAAGCCACCACACTGGTGTCAGTCCCCATGTCCCAGTTCAAAAGATGGTGGATGGCGGAACTGGACCAAACCTGCAAAGCTATGACAGGTGCCCATAGATGCT…
866	1337	9589	10358	770	C	LINE/Tad1	TACAACTGCATCAACTGCACCGATGCTGGTCACAGTGATACCACACATGCCACCTACAACACCAAAAGCCCTTTCAAGTTCACCACAGTTAGAGAAGCATGGCAGAAGACCAGAGCCAACCGCACCACCTCCGACAAGTCCCCCACTGACACCACGATGACCGCCGATGCATAAATACAAAGCTACAGCAGTGACCCTCCGAATTGTGTCCCATAACACAAACTGCAGCACCACCACCCTCACCACCCAGCTAAGCACCACAGGGAACTCCACTGAGATTATACTCATACAAGAAGACAACATTAAAGACCCAAGGTATGCAGTGATACACCCTGATTTCCTTCTCCTCCTCCCCCCCTGTGGCGACCAAACAGTGAACTGCACAGCTGCATATGTCTC…
867	1337	10417	12605	2189	C	LINE/Tad1	CATCATGTACAAGCGAAACTAACGGCTGCATCTAGGTCCTTCAGTGCGCTCTGCAGCCTTGTAAGACAAGAAACAGGTTTGTCTCCCTCCGCAACACGCTTGCTTTACTGCGCATGCGTCCTCTCTAGGGCCGACTTTGGAGCTGAGATCTGGTGGACGGGGCAGAAAACTCTCCAATGACGCCTCCAAACTCAACAAAATGCTGCCCTCTGCCGAATACTCAATGCTTTCAGATCTACCCCGACAGTTGCACTACACAATGAAGCCACCCTCCCTCCTGTTTTGGTCCATATGCAGAGCAAGCAAAGAAAATACGGCCTCCACCTCTTATCACTCCCCCCATCCCACCCAGTAGTTAGACGCTGCCCCTCCTCCTTCCTGACCCCCAACCACCTCTCC…
868	1337	12675	12907	233	C	LINE/Tad1	GGAGGAAATGAAAGCAGAAAAATGGTTAAAAAAGGAAGGGGAAGGGTGGGGGAAATGGGGGAACGACCCGGCGAGATGGCCTCTGAGCGCACAGGGCTCCTGGAACAGATGACGCGAGATGGATTATGAACCAAACGAGACTTGGGGGACTACAACCCCACACATGAAGACTGCTCTGGGGCACGTCCCAGTGGGGACCTGGGGTAACAGCCAGGCCCTGAAGTATGTATTTA
869	1337	12908	14657	1750	C	LINE/Tad1	CCGCCCCGGCGGTAGCCAAGGAAGTGTCAAACTGGGCCGTTGATGAGGAGAACCCAACCAGCTCCGACCAAGAGGCAGTTACCTTCCAGATTACCTCCCTACACCCAGACACAGAATACACGTACCCAGAACCCTGCCTCAACTGGCGCAAAACAGACTGGGACAAGTTCACCTCCATGCTCCAACACCTCTCCGCCAAAAAACACCCTCTGTGGACCTCCCTCCACTCGAACCCTTCCCCACAAAACCTTGATGAATGGGCGACCTTGCTCCACGACATCATCCTCTCTGCAGCCAGTACTTTCACCCCTCCGCTCCCCCTATCTCCCAGATCCAAATGCTGGTGGACGGCTGAGATAGAGCAAACTCGTAGGGCCATGTCCCATGCTCGCCGGACAT…
870	1337	14664	16290	1627	C	LINE/Tad1	GCCCGCCGCACCCCCGAGACCGTGCAGTCAGCCATGGCAAGGACCCGCCGCCTGCACCCTCCTCTTCCCCAACCTCCCTCCCACCACCCACACCTGCCCCGTGGAAACCAAGGCCAAAACCCCCACCCCTAACTGCACACCTCCCCACCCCCAGGATATTGTCATACCATGCTCGGACCCCCGCGCCCTCCGCCACAGTGCCAAAGTTGCAATCGGTCTGGCAGTCAATGCCGCCCTCCGGAAGGCCAATGCCCCTGCCACAGTCGCAATCACGACAGTTCACAAGAACATGGCGGGCAACCTCCTCCTCACCCCATCCACCCAGACCCTCACCATCAACATCATGACCCACCTCCCAGTCATCAAGGAAGCTGCCATGGCAGTCCACCCATCCCTCTT…
871	1343	430	2815	2386	+	LINE/Tad1	CTCGCTACCAACAAACACGCTAATGCAGAGCCGCAAGACATGCATGCACATGACGCGAATGGCGATGCGATGCACGTCGACTCTGACGTCATCAACAGCGAAAGCGACAACGACGCGTCCTCCCCACGCGACAGCTCCCCATCACCGACCCCCCGCAACAAAGCCCCTCCCCCCGTCACCACCCAACACCCCAGACTGTTTGACCGCAATGTTTTCGTTGACTTCTCCCCTCACCCCATACTTACAAACACCCCTGGACACACCATCGGCACCACCAGCGGCATGCAGAAGAAAATAGCCAACCTTAAATGCAATGCTATCTCCACCACCCACTCAGTGCAATCCGGCCCCGGCTCAGCCCCTACCAAAGCTGGAATCAAACGTCACGCACCCGACAGC…
872	1343	2953	3352	400	C	LINE/Tad1	AAGAGACACAGGGGACGAGGGGAAGACGGAGAGGGAGTCATGGAGGTGAGGGATGAAGGGAGAAGTGCAGGAGTAGAAGGAGTAGCGGAGAAGTGAGACAAGAGAGGTGGGGGGGCGGTGGCCTGGCAGAGTTATCTTTTTCTTTTCTTTTCTGTTATGTCTTGGTTTGTGGTGGAAATAAAGGTGGGAAATTGGCTAAAAATGGGCGGGGAAGGGTGGAGGATAGGGGGGAACAACCTGGCGTGGTGGCCCCTGAGCGCACAGGGCTCCTGGAACTGATGACGCGAGATGGATTAAGACCCAACAAGAGGGGAGACTACACTCCCAAACCCTCATAACAGCTCTGGGGCTTAACCAGTGGGGACCTGGCATCATGCCCAGGTCCTTAACATTGTATTTA
873	1345	81	1951	1871	+	LINE/Tad1	ACTCCCTACACCCCGACTCGGAACACGACACACCAGAGCCCCGCCTTAACTGGCGCAAAACAAACTGGGACACGTTCACGTCCACCCTCCGCGAACTCTCGGCCAATAACCAACCCGTTTGGAGCACCGTGCGCGCGAACCCCACGGAACGCCACCTCGATGACTGGGCAGTCCTCCTCCACAATATTATCACCACTGCTGCAGCACAGTCTACCCCTACACTCGTCCTCTCCCCACGATCAAAACGATGGTGGTCGCCAGAGGTGGAACACATGAGAGCAGCCATGACCAGCGCTCACTGCAAGTGGCAGAGGATGCGCTTGCCCCACCACCACGAGGAGTACCGAGCCCTCTGCAACACGCACTTCCGAACAGTACGCCACGCCAAAGGCTCGCTGT…
874	1347	10	740	731	C	LINE/Tad1	CGGCAACAAGGAAGCTGACCGCTTAGCCAAACAAGCAACCTCCCAACCACCCCGAACCACAATCCCTCTCTCCCTATCGTGGCTCCATAGAAAAATCCACAAACAACACTCAACCGACTGGCTCTCCTGGTACAACGACTCCCCAAAGCCAAAGGCGTATGCTGCACCACATCGGAGAAACCTCGATGCAGCCTACACAATGCTCCCACGAAAACAATCCACAGCTATCCTAGGACTTCGTACCGGCCACGGGTACTTCCTTGATTGTCTTGCCCACATCCCCTCCTGCAAATACCTGTCCCGCAACTGCTGCTGCCCCCTTCACCCCCCCAAACCTCCAAACACCTCCTTCTCTCCTGCCCCATCTTCCAAAGCCAATGAACTGAACTGCGACAAACA…
875	1350	1801	4879	3079	+	LINE/Tad1	GTCTTAAAGGTGGGGTATGACACTCGGAGGGACATGTCCTGTGCCCGGAGATGATGGAAAAGTTCCCGGCTCCCTGCCCATCATGCTGAGTTCAAGCAACTCCGGAACGCTGATTACCGCCGTGTATGACACGCGAAGGACTCGCTGTGGAAGGAGTACCTCTCCCAGGCAGAAGGCGCCAACGTATGGGCGGCCTTCCAGTACACCAACCCACGCCGGGCTCAACTCACCCCTCCCATCAGAATTCAGGTTGAGGGCGAAGAACGCATATGCGCGGACTTCCCAAGCAAGGTTAAAGCCTTCCAGGCGCTCTTCCCACCCCCTCCCCCCGCTCCCCCCCCCACCCCACTGACAACCAACCCCACCCCGAACTCCCATGGCAGACGTTTATGCCCACAG…
876	1351	50887	52509	1623	+	LINE/Tad1	AGGAAGGCACCAGGGCAAAAGACCGAAAGACCAACAGAAAAATCACCACACAAAACAACCCCTTGACACCAGTCAAAGAAACCAAAGACCCCCGAGACAGACAAGTGGTAATGGAAAGAGACTCAAAAACACAGAAACCGGATGCAAACATGGACAAAACAATGATCCACACAATAAACAAACACCTGACCGACCACAACGTCCCGGAACACATTCGCATCGACCTGGCAAGAGTAACCACAAATGGAAACTGGAGCGTATTCTCCAAATACAAAGCAAACGCAAAAATGCTAACACACGAAAAAATTAAACCCCTGATATTGGAAGCGGCAAGAAACGTTGACAAAGACATCATAGATATACAAGAAATCAACCCATGGCCCAGAATCAAAATCCATC…
877	1351	52944	53592	649	+	LINE/Tad1	ATCGACCCCAAAATCGGAGTCGAACCCATCTGCAGAACGAACACCACAATAAAAGGAAAAGTCATAATACAAGACAGAGACACCGCAACAACAAACGCGACACAAGCCAGTATGATTCCTGGAAACATGTTCACAGATGGATCCAGATTTGAAACGGGCGAAGTGGGATGCGCAGCAGTTTGGCTAACAAACAATGGAACATGGAAAAAACACCAATACCACCTAGGAAAAAAGAAAGAAATTAATGATGCAGAACTCTTTGCGATAGTCGAAGCCCTAAAAATGTCAAACCGATACCAAATCGGAGACAGAGAAACGGACACACTACACATCTACACAGATTCGATGTCAGCCCTGAAGAGGATTCAAGAATCGACCCCAACATCAGGCCAATGGATC…
878	1352	1	1698	1698	+	LINE/Tad1	CTGCTAGGTCTTTCAATGCCCTCCGAAGTCTGGTCAGACATGAGACAGGTCTGTCCCCCTCTGCTACTCATACACTCTACCACGCATGTGTGCTCTCTAGGTCCGATTTCAGCACTGAGATCTGGTGGTCCGGGCAGAAAGCTCTGGCACGCAAACTACAACTGCAACAAAACTCCGCCCTCCGCAGAATCCTGAATGCCTTCACCTCAACTCCCATTGTCGCCCTCGACAACGAGGCCGCCCTCCCCCCAGTAATAGTACACCTACAACATATACAGAAAAAATACGCCCTCCACCTCCTCTCCCTCCCCCCCTCCCACCCTGTCGTCAAATGCTGCCCTTCCTCCTTCCCCATCCCCAATCACTTCGCTACCTCCCTACAAAGCCCGCACGAATATG…
879	1354	51	3269	3219	C	LINE/Tad1	CCTGGCTTCCCCATCGATGGCAATGGAAATAACAAACTGGGCCATTGACGACGCAATAGCCACAGGTTCAGACCATAAGGTCATCCGGTTTCAACTAAACTCTCTACATCCAGACCACATGGCAGCCCCCCTTGCAACCACTTATCTAAACTGGAACAAAACGGACTGGGATACATTTACCAAGGAGCTCCAGCTCCTTGCGGAGGCCAGCCACCCATACTGGACCCACCTCCATGCCAACCTCTGTGCAAGCAACCTCAATGAGTGGGCCGCCCTACTCCGCGACTCCATACAGAGTGCAGCGTCCAAGGCCACCCCGACCCTATCACCCACCCCGCGCTCGAAATGGTGGTGGACTAATGAAATCCGCCACACCCGCCGTGAAATGACCACTGCCAG…
880	1354	3270	3675	406	C	LINE/Tad1	ACCACAAGGTCAACCGCACTGCCGCGTGTGTCTCCCAGCTTAATCCCCATGTCCGAGTCACCCCCAGGCCGGATGTCAGCGGAGACCCTGACCTCCAGGTCCTAGAGGTCAGCACCGACCTCATCCCCTGTTTTTACCTTCTCAACATCTATAATGAACGTGACCCCACTACCAAAACCTACACTATCCCCCGAGCGCTCACCCCCCTTACCCTCCTGCATCGATGCGTCATCACAGGGGATCTCAACTCCCATCATCCTCTGTGGAACTTGCACATGCGCAGATGAACATGGGCCACCGAGCTCGTCGAACTGTTGGAATCACATGACTGGCTGCTGGTGAACGTCCCAGACATCCCAACCCACCAATACAAGGACGGCACAGGCTCATCGGTTCTGG…
881	1358	1030	1863	834	C	LINE/Tad1	GCGATGGCGCTGGTGCACGATGTCAAGATCGGGAAATCTGACGGACTGCTAACCTGCGCCCTCTTCCTCGACATCTGGGGAGCTTTCAACAACGTCTCTGCGGAACGCCTACAACAAACACTACGCCAGCTCGGATGCCCGCGACCAGTGGTATCATGGTGCCAATCTTTTCTCGCAGATCGCACGATTGCTCTAGCATTCGACGGACGGACTGACAAGCAACGACTGGTGCAGACAGGCATCCCACAAGGTTCCCCTGCATCCCCCATTCTTTTCCTACTATACCTTCACCCACTGTTTGACGAACTAGCTAAGACACACCCATATGCCTGGGCTCCTAGTTCCATTGACGATGTAGCGATCGTGGTCCAGGGACGCACCTGCAAAGCAAACGCCCGC…
882	1359	529	1080	552	+	LINE/Tad1	ATCACTCTCGACTCCACCATCTCAACACTGCTGCAACCGCTGATCAAACCCTCCAATAAATCAACAAAGTTATTAACGAATCCCAAGATATCACCCAACCCCCATTCACCCTCGCATGAATCACCAGCAACAACCGCTTAGTGCTTACCACCAATCCCACCACTAAAGCATCTGCCTATGCTCCCTACCTACAGATTATTGCCAACACAACAAAATCACTTAAACCAGTCGAAACCAGAATCAACGAACGCTGGACCAAATTCCTCTTGCATAATGTCCCCACCAATGCAGACCTCTCAGCTGTCAAATATGAAATCGAAGCCACATACGCCTCCCTACACCTTGCACAAAACCCCCACTGGCTAGTCCCTGTGAACCGCCACCTTAACAAATCTGCAT…
883	1360	6	807	802	C	LINE/Tad1	AGTCTGCCATCCTCCGCGCATCACGACTAGACAGAGGCCCAGGACAAGAAACCGCCCTCGAAATCCTATGCACCGCCACCGCCTTCCTCCGACGCTCGACCACAGTAACGATACACTGGGTGCCAGGATACACTGCCATCGATGGCAACGAGGAGGCAGACCGCCTCACAAAACTGGCAACCATGCGCCCCCCCCTCACTGACACACCTATCACCCTATCCTGCCTCAATCGGCGCATCAAGGAACAACACTCTGCTGACTGGACCACATGGTACCACACCTTGCCGAAACCAAAAACATACGATGCCCCCTTCCATCGTCACCTAGACAGTGCATACACCTCCCTTCCCCGACGACAATCCACGGCCATCCTGGGCCTCCGAACTGGACACAGCTAAT…
884	1364	2	689	688	C	LINE/Tad1	AAACCTACCGCCCCATTGCCTTGCTGAACTGTCTAGGTAAAGTGCTGGAAAAACTTATGGCAACGTGGCTAGGCCTGATGGCAGAAGCACACAAGCTGCTACACCCCGATCAGATCGGCGGCCGACCCCTGCGCTCGGCAATCGTCGCCGGTATGGCTCTAACCCATGATATTGAAACAGCCACCAAGGACAAACTACTGATGTCAGCGCTGTTCCTCAATGTCCGAGGCGCATTCGACAACGTCTCCTCAGCACGTCTCCTCCACACAATGCATCAATTAGGCTGCCCACAACAAGTGCTATCATGGGGAGAATCCTTTCTCTCCGGCCGCACAATGGCTGTCTCCTTCGACGTCCGCACTGACATACAACGCCCGATCTCCACCGGAATTCCCCAAG…
885	1364	880	2456	1577	C	LINE/Tad1	CGCCAGCGGAAATACGCACTGCACACCCTCACTTTACCTGCTTCACACCCGATTATCACACGCTGCCCTGTCTCGTTCCCCGCACCGGGTGTCGAAGATGCCTCCATCAACTCGGACACCCAGTACGACCACCCGTGGCAAACCCCAGAAAACGCCCCGTCCCGCCTCCTCCACATCATTCACACACTCTCCCCATGGGTCCGACCCAATGCCGAGATTGAGGACACCTCCCAAATTATCCCCGAGGATGCCCTTGCCCCCACACTGACAGTCGACATCTCCCCCTCTCCAAAGGACAAGGCTGCCGATGACCACCTCCTCCAACTCCACACCCTTCGCCAACAGCCGAACACCATTCTACTATACATGGATGGCTCCCAACTTGACGGCATGACAGGC…
886	1370	23	409	387	C	LINE/Tad1	AAAAAGAAGGCGGATGGATGGAATGCAGGGAAAGGGGAGAATGGAGAGTGAGGAGTGAAGTTGAAGTGGGGAGAGATAAAGACGAGAGAGGGGAGGAGCAGGTGGCAGAGGCGGCCGGGCAGAGTTTTACTTCTTTCTTTTGTTTGTTTTTGCTTTGTGGAGGAAATAAAGGTGGGAAAATGGTTAAATATGGGAGGGGAAGGGTGGAGGAAATGTGGGAACAACCTGGCATGGTGGCCTCCGAGCATACAGGGCTCCTGGATCCAACGACGGGAGATGGAAGAAAGTACAATGAGCCTTGGGTGACTACAACCCCACACCCAATGACAGCTCTAGGGCCTATCCCAGTGAGAACCTGGTGTATCAACCGGGTCCTTAACTTTGTAT
887	1370	818	2770	1953	C	LINE/Tad1	CACAATGCGCGCGCTCAGATGCCCAACCGCAGTAATGTTGTGGTGCTCCTCCTTTCTACGTGATCATACAACAGCGCTGTCATTTGATGGCCAGACAGATATCCAATGCCCGATCAAAACTGGCATCCCCCAAGGAGCCTCTGCCTCCCCCATCTTGTTCCTAATCTACCTTCGCCCTCTCTTCGACACACTACAATTGACACACCCCACATTATGGACACCGAGCTATATTGACGATGTCACCCTCGTCGCCCATGGCCGGACAAGAGAATAAAACGTCCCCGCCCTGGTGGCAGCCGCTCACACTGCCTTCACCTGGGCACAAGAAAATGCAGTCACATTCAACGACTCCAAGTCGCAGCTGCTCCACTTCCACCATGCCCGAGAAGATACCCACTC…
888	1370	2831	3192	362	C	LINE/Tad1	AAGGAGGGAACGGAGTGGAGCCGAGGAGTGTAGGATGAAGGAAAGGCAGAGACGATGGGGAGGGCAAGGGGAGAGAGGGGCGAGGGGCGCGGGCAAGGATGGCCGAAGGAGTTTATCATGTCTTTTGTTGAGGAGGAAATCAAGGTGGAAAAATGGTTCAAATTGGAAGGGGAAGGGAGGAGGAAGGAGGGGAACAACCCGGCGAGGTGGCCCCTGAGCAAGCAGGGCTCTTAACTGAATTGGCGCAATGGAAACCAGGCTGGAGAGATTTGGGGAGCTGCAGCTCCAACACTGAAGCACACTCTGGGGCTCATCCCAGTGGGATCCTGGGGTTACAGCCAGGGCCTCAAATGATGTACATA
889	1371	66	670	605	C	LINE/Tad1	CTCACCTCCTCCTGCTCAAAGACCTTTGACACTGGCAAAACACCATCATCTCTCACACCGATGGCTCACACATGGAGTCTGCCACCAGTGCAGGATACACCATCCTGATAGGCCTACCCAGCACCATCAATGCTATGGTCCGGATGGGAAACACAGTGAACATGTTTGATGCAGAGCTACATGCAATACACGAATGCCTTCTAACATGAGTCAAGTATGCTCATCAACACCCTCTGAAGTTGGCAAATCCATGTTTTCACTGACAAGCAAGCTGCCATCACATGCACCTCTCACCTTCACTGTGGTCCTGGTCAGGACCTCGCCTACCTTATCCATGACACCGCAGATCATCTACGGGAATTCAGCACCACAATCACCATTCACTCGGTCCTGGGGCAC…
890	1375	81970	82239	270	C	LINE/Tad1	ATAGTGCAGCTGTTTAAGGAGGAGAAAGCAGAGAAAGCGGTTTTGGATTTCATAAGGAAGACGGGCGTAGGCAGAATGAGCGGCATGAGTAGGCCGGAGGTAGATCACGAGGAGAGCGATGAAAGTGATGAGGAGAGATAGGGGCAAACCCAGACATGTGGTAGAAGAAGGCGGAAGTTGATTACAAAGGCGGAAAGAGGGGAAAAGGAAGGGAGCCACAGTTGATGCCACATAAGGCAGTGGACAGGATAGGGTGGAGTAGTAGGCGGT
891	1375	190487	192501	2015	+	LINE/Tad1	CGACTCCACCTCCACTTTTTAAAATTCAAGCACAAAACATCTTTTAAGACCCAAAAAGAGACGTCCTCCCGCCTGACAATGACGGAGCACGCATCTAATCGTCCAGAAGACGAAGGAGGCCAAAGAGGCCCCGGAACTGGACCTGAATTCGGCGAATATCGCGAGAAACCTCAAGAAACCGCCTCGGACTTCTCCGACCTTACGACTTCGAAGACGAAGAAGACGCAATGGAGATCGAGACGAACAAAGAAACCAACCAATCCAGCCCTAAAATCGAAAAGCCAAACCCCGAGATCATCGAAGCGAACCCCCCGGCCAACCTGGGCCCAAGCTCAAGCCACCTAAACCCCCCGCTCCCGAACCCCCAACCAACTAACCCCGAGACACCTGAGAACCCCC…
892	1375	192818	195038	2221	+	LINE/Tad1	GCCGGAGCTCTACTAATAGATGTCAAAGGAGCATTTGATCATGTATCCAAGATGCAGTTAACCAAGAGAATAGAAGGATTGGAAGCAGACTGGCAAATAATCCAACAGACTAATAGCTTCATGACGGACCGAAAAGCATCACTCGTGATAAATGGACATGAAAGTGCCATGAAAAAGACAACAACCGGAATACCCCAAGCATAGCCAGTATCACCCATTCTCTTTGCAATCTACATATCAGGAATCTTCGAAGAAATAGAAGAAGAAGTCCTGGGATTCACAGGATTGTCATTCGTGCATGATATATCATGGCTGACTGTAGGCAAAGACGTAATGGAGATAACCAACCTACTTATGGCATGCAAAAAAGCAGCAAAAGCCTGGGCAAGCAGAAACGCA…
893	1375	198430	199143	714	+	LINE/Tad1	GCGAGCCTGGCATACGTAAAGAGAAAGACGGATGAGATCCGGAGGAGCGAAACGAAGGAGTGGATCCGATCCAGGACAGAGCATGGCAAAGCTTATATCCCACGGAAGACCCAGGCATAAGAAAGAGCCTACGGAACGAAAAGAAGAGGGTAGCGACACGGTACTACCAGCTCATGACGGGACACGCAATGCTAGCACCCTACCTAAAGAACAAACTGAAGAACAAGAGAGAATCCGAAGATTGCTGATGGTGTGAGTCAGGAAAGAAACAAACAAGGGAACACCTCTTTAAAGAGTGCATAAAGTGGAAAGATGAGATCAAGGAGTTGTAGAGGAATGTAGGGAAAGACGTTGGCTGGAAGAGAGCCAAGTGGAAATCAATAGCACAGCTATTCAGAG…
894	1375	343145	343808	664	+	LINE/Tad1	TGTTGGTGGTGCAACAACGGAGAGCGCCAATCAGTACGTCACCTGATAAAGGAATGCCATCGATGGAGGAAAGAAAGAGCCAAACTGCGAAGAAAGATAACCCCAGCAGTCTGGTACCTCAAAGGAGTGGAACACCTCTTCGTCGACAGATCCAAGACAAAGCGTGTCTTAAAATTCCTCGAGGACACGGAGGTGGGAGACCGAACGAGCGAAAAGGAAATGTATGAAAGAGAAGAACAGAGAGACGAAGTGCGGAGATGGAGCGAGGAAACGAAAGTAGAATCAGAAAGCGAAGAAGGAGGAAGAATAAGGGATGAAGAAATCATGGAGAATGGAATGGATTTAGAAGACGTGGATGAGTTGATTGAAAGGGTGTTGCAGGAGGCGAGAACAGGAGGT…
895	1376	1	795	795	C	LINE/Tad1	CCCCCCCTGCATCTCAACAACCACCTGGAAATCGCCAGATTTTCAAGCGGATTATTGTTCAGCAGCCAGAATTTACCTTTCCGCAGCGTTTTCAGAACAGGCCCTCTCTTTTTCGTCGAGTTACACGGTGAAAAAGAGATCTCCGGGCCCCTGAAGAAGCCCCGCGCATTGGTCATCAACACCACACCCCACCACAATCAAAAATCATCAATTTTCCAGCGGAATCCCCGTCGCGACCGCAAAATCTACTTATCCCGAAATCCCGATGCCTCCCGGTGCCTCCGTTGTGGAGAAACCCCCTCTCCCTCCCGACAAAGAACCTCTCCGGGCACTCGCGAAAGGAAAACATGCTAACGCAGAGCCGCACGAAGCGCGCGACGCGTCCGATGCTGAGATGCA…
896	1376	830	1306	477	C	LINE/Tad1	GTGACACCTGCAGCCCTACCACCCAAGTTCCTGCAACCCCAACCCACCGAATCATAACTATTGACCCCAACTCCGCCATGTCCACCAACCCCCTCGCCCGCGCAGACGCCCCTCACGCTGGCACTTCCTCCACCACCGCCCCGTCCCGCAGAAAGCCTACGTCCTCTACCTGCCGAAATGCCACCCGTGTCAGCAGAGTTACTAAATCCGAAATTAAAATCCTCCGATGCGCTGCCAAGGAAAAGACACGCGCCACCATCGCTAACCTCGACAACATCCCCACCATGCATAACCTCGACAACACACCCGCCCTACCCGACCCCATCGACATCGACGCAGACATTGACCTTGAAGACAAAGAAGACTACGAATCACACCTCCAACCAAGCGATGACTTCC…
897	1381	28	241	214	C	LINE/Tad1	CCCTGCATTATCAACAACCACACAACATTCTCCGGGTTTTCTGGTGGAATTCGAATCAGCGACCCCAATTTACCCCCCCTCGCCTTTTTCAGGCACCAATTCCCGTTCTCCGTTGAGTTTCAGCGCAGAAACAGGCTTCCGAAGCCCCCAGGCAGATCAGCGGCCAGCTCCATTGCCGCCGCCCGCCCCCCCGCCCGCCAGTCATCAAATAAAC
898	1382	3	3771	3769	+	LINE/Tad1	CACGCCAACCCCTCTGCAAGCAACCTCGACGAGTGGGCCGCCCTTCTCCACAACTCCATACAGAGTGCAGCGTCCAAGGCCACCCCGACCCTATCACCCACCCCGCGCTTGAAACAGTGGTGGACTATTGAAATCCGCCACACCCGCCGTGAAATGACCACCACCAGACGCTGATGGAAGCTCTCCCAGCTCCCCACCCACCATGACGAATACAAGCGCCTCCACAACAAACACTACCGGACAGTGCACTATGCCAAGGACTCGCTATGGAAAGAATACCTCGCAGCAGCAGAAGGCCTGGATGTCTGGGCGGCGTTTTGTTACATGAACCCACATTGCACCCAACTGACCCTGCCGGTCAAAGCCCTGGTAGGAGGTACAGAGAAACTGTGTGTTGAC…
899	1382	3852	5898	2047	+	LINE/Tad1	GCTCTGACATCACCAAAGACTTTAGCCATGATGGCATGTCTTCCTGCAAGAGCTCCCCCATGCCCAATGCCCACAATACTACCAACGTGCCCCCCAAACCCCCCACAACCAGCACAGTACCATCGCTGATGGGCAAAAAGACAGCCCTGACAAACTAAGCTGAAACAACCACAAGTATACCATCCAGCAAACTGTCAGCAAAAATAAAAAATGCCCTGCTGCCTCCACTGCCCACTCCATCACCCACATAGCCATGGACTCCACCCCCATACCATCCAGGGTTAAATGCCGCCACCACATCACTCCTGCCAATTCCTCTGCCCCCCTCACCACTGACAGTCCTGCAACATCCATCGATTGACTTAACAACAAACTTAACACTGCCACAGACATGTTCCG…
900	1382	6270	9119	2850	C	LINE/Tad1	GCATGAGATAGAAGCGAATGCCAGGCGTCACTTCATTACGTCATCCCTGTTTTTAGATGTATGAGGCGCTTTCGACAACATCTCCTCTGCCCGCCTACTTGCCACAATGCGTGTGCTTGGATGCCCAAACGCAGTAATGTTGTGGTGCTCCTCCTTTCTAAGTGATCGTACAACAGCGCTGTCATTCGATGGCCAGACAGATATCCAACGCCCGATCAAAACTGGCATCTCCCAAGGATCCCCCGCCTCCCCCATCTTGTTCCTAATCTACCTTCGCCCTCTCTTCGACACACTACAATTGACACACCCCACATTATGGACACCGAGGTATATTGATGACGTCGCCCTCATCGCCCATGGCCGGACAAGAGAAGAAAACGCCCGCGCCCTGGAGGCAGC…
901	1387	1396	4127	2732	+	LINE/Tad1	ACCCGGAAATTGCCAGATCTTCAAGCGGATTATTGTTCGGCACCCTCAACTTACCTTTGTCCAGCATTTTCAGACCAGGCCATCTCTTTTTTGTCATGCTACATGGTGAACAAGAGATCCCTGGGCCCCTGAAGATGCCCTGCACAATGGTCATCAACACCACAACCCGCAATCACCAAAAACTATCAATTTTCCAGTGGAATCCCCGTCGCACCCATGCAAGCTACCTATTCCGAAAATCCGATGCCTCCTCGCACCTCTGCTGTGGAGAAACAACCTCTTTTCCCTGACAAACCTCCTATACACGACCTTGTGAACAGCCAACACGCTAATGCAGAGCCGCCCGCAATGCAGAGATGCGACGTGTACCACGACATGATGCACATTGACACACAATAT…
902	1387	4132	8158	4027	+	LINE/Tad1	GCAACTCTGGCAATGGCTAGGGAAGTATCGAACTGGGCCATAGATGATGGCATCTCCACAGGATCGGACCATGAAGTAGTCTGCTTCGAAGTGAACTCCCTCCACCCAGACTCCACCATCTCAACCACCACTACCCGCCTGAACTGGCGCAAGATGATCTGGGATACCTTTGTCACTGAGCTGCATAACCTCTCTGCATCACCCTATCCCTGATGGTCCCACCTCCAAGCAAACCCATCCACCCGCCATCTCGACGAATGGGTGGCCCTTCTATGGGACACAATATGAATGGCAGCCACAGGTGCGACACCTACCCTGACCCTCTTGCTGCGATCGAAGAGATGGTGGACACAGGAAGTAAGTAGAACATGGACAGCGATGACAGGCACTCGTTGTAAG…
903	1388	1196	2809	1614	+	LINE/Tad1	CCCCCCTCCTCTACAACACACTCCCGCACCCTCTCAACCCTGGAAAGGCACCCCCACCTCGAAGGCTCTATTCACCGCAGCCCCCAAGCTGAAACAACAGGCCCCAAAAAACCCCCCAAAGAAATCCCCCTGCCCCCAGGAGCTGGTGATCCCCTGCTCTGACCCACAAGCCCTCCTGGATGGCGCCAAGGCTGCCATTGGAGAGGCCATCAACAAAGCTATAAGAGCAACCGATGCCCCCGACAACATAGGCATCCTCATGGTGAGAAAGAACATGTCAGGAAACATCCTGCTCACCCTTCGCCCCGACACCCCCCTCCCTGAACTGTTTATCCACCTTCCCCTCATCCAAATAACAGTCCAGAACATTCACCCCTCCCTGATGGCTCCCAGAATAAC…
904	1388	2812	4202	1391	+	LINE/Tad1	TAGCGGCGCCAGCTGTGGTGAGGGAGGTAATGAACTGGGCAATCGACGAGGAAAATGCCACCAGCTCTGATCACGAAGTGATCCACTTCCGAGTGGACTCACTCCACCCCAACCTGGAGTTGAACACCCCATCGCATCATCTTAATTGGAAAAAGACAGCCTGGGACACCTTTACGATTACCCTCCACCAACTCTCCAAAGCCAACAACACCCACTGGAGGCACTCGTCCAGAAACCCCTCCCCAACAAACCTGGACTCCTGGGTGGAAATGCTGTGAGACATCATCACTGAGGCAGCAACCGCCTCCACCCCATACCTCACGCCCTCACCCCGCTCCAAACGGTGATGGACAGATGAAGTGACAACCACCCACAAAGCCATGACTCATGCCTGCAAGA…
905	1388	5860	8498	2639	+	LINE/Tad1	CCTGCCCCCCTGCGTTCTCAACAAGCATGCCGAAATCACCAGATTTTCGAGTGAAATCACGTTCAGCATGCTCAATTTGCCTTACTGCATCAATTTCAGATCAGGCTCCCTGTTTTTCAGCGTGTTACATGGTGAAAAAGGGATTCCCGGGCCCCTGACAGAGACCCGCAGTGCCGCCATCAACACCCCACCCCACAACAACCAACAACCATCCTTTTTCCGGCGGAATCTTTGTCGCGCCCACAAAAACAGACTCTCCCGAAACCCCCATGGCTCCCCACCCTCCCGTGGTGGAGAAAACCCCCCCCTCCAGAGCAAAACCTCCCCCTCACAACACTGCAACAGAAAAACACACTAGCCCAGAGCCGCAGCCACTGCAGAAATGCGACACACATGCCG…
906	1388	8565	11812	3248	+	LINE/Tad1	ACCTTGATGAATGGGCAAACCTGCTGCACTAAGCCATAAAAACTGGCGCCGAGAAATCCACCCCCCTGCTGACCCCCACCCCTCGCTTGAAAAGATGGTGGACCATGGAGCTCAAATAAACTCACAGGGATATGTCCCATGCCCAGAGATGATGGAAAAGTTTGCGCCTCTCCGCCCATCATGCTGAGTTCAAGTAACTCCGGAATGCTCATTACCGCCATGTACGACTTGCGAAGGACTCGCTGTGGAAGGAGTACCTCTCTCAGGCAGAAGGCCCCGATGAATGGGTGGCCTTCCGGTACACTAACCCATGCCGGGCTCAACTCACCCCTCCCATCAAAATCCAGGTTGAGGGCAAAGAATGCATATGCGCAGACTTCCCAAGCAAGGTTAAAGCCT…
907	1391	1	1828	1828	C	LINE/Tad1	CCCCCCTGCATTTTCAACAACCACGCTGAAATCGGAAGATTTTATTGCGGATTACTGTTCGGCAGCCCCGAATTACCTATTCGCAGCATTTCCAGACCAGGCTTACTCTTTTTCATTGAGTTTTCATCGAATGAAGAGTTTTCTGGCCCCTGAGAAAAGCCCTGCGAACACGGTTCCATCAACACTGCACCCCACACACATCAAGAATCATCATTTTAATCGCGGATTCCTTGTCGCTACCACAAAAATACCTTATGCAGACACTCCGATGCCTCCCCGATCCTCCGCTGTTGAGAAACAGCCCCTCCCCCCCGACAAAGCACCCCCTCAGGTGCTCACGACGAAGAAACACGCTAACGCGGAGCCGCAAGTGCCTGATGCGTCCGACGTGGAAATGCA…
908	1391	1880	3183	1304	+	LINE/Tad1	GACACAGTTCGGTGGATTGGAATATTCTTTGATAGAAAACTCTCTTTTAATCATCATGTACAAGTGAAGCTGACCGCCGCATCTCGGTCATTCAGCGCCCTCTGCAGCGTCGTCCGTTTCCAAACAGGTCTGTCCCCAGAAGCCACCCGCTTACTATTCCGTGCATGCGTCCAATCTAGGTCCGATTTTGGTGCAGAGATCTTGTGGCAGGGCCAAAAAGGCCTCGAAAACAAATTACAACAACAACAGAACAACGCCCTTCGACGTATCCGCAATGCTTTCCAAACAACCCCGACCCTCGCACTTCACAACGAAGCTGCCCTCTACCCAGTCTCAGTCCGTCTAACTACAAAGCAACGCCACTACGCTCTCTGCCTTCTCTCCCTCCCCCCTACCCAC…
909	1392	33	394	362	+	LINE/Tad1	AAGGAGGGCATGGAGTGGAGCCGAGGAGTGTAGGATGAAGGGAAGGCAGAGACGATGGTGAGGGGAAGGGGAGAGAGAGGCGAGGGGCGCAGGCAAGGGTGGCCGAAGGAGTTTATCATGTCTTTTGTGGAGGAGGAAATAAAGGCGGAAAAATGGTTCAAATTGGAAGGGGAAGGGAGGAGGAAGGAGGAGAACAACCCGGCGAGGTGGCCCCTGAGCAAGCAGGGCTCTTAACTGAATTGGCGCAATGGAAACCAGGCTGGAGAGATTTGGGGAGCTGCAGCTCAAACACTGAAGCACGCTCTGGGGCTCATCCCGGTGGGATCCTGGGGTTACAGCCAGGGCCTCAAATGATGTACATA
910	1392	743	4116	3374	C	LINE/Tad1	CCTGGCATCGCCAACGATGGCATGGGCAGCAACAAACTGGGCGATAGACGACACCCAAGCTACAGGCTCTGACCACGAGGTAATCCACTTCGAGGTCACAATGACAATCCCCAACCCCACCATTGCCACCCCACAATCCTGCCTCAACTGGTCACGCACAGACTGTGACAGTTTCTCTGACACCCTCCGCTCACTCTCAACATCCACACAATCACAATGGGAATGCCTGCGCCTTGACCTGACCATGCCACACCTCGACAAATGGGCGGAGATGCTCAGGGACATCATAATGACCGCGGCCGAACACGCTACACTGCCCCTAGATCCCTCCCCCCGCTCCAAACACTGGTGGACCCCCAAAGTCTCAGCCACCCGGCACAACATGCAACAGGCTCGCCG…
911	1393	105	1226	1122	C	LINE/Tad1	ACGCCCCTGCCTCAAAACAAGCATCATCTCCCTCCCGAAGACAAAGGCAGGTACCGCACACACTACACTGCTCCAATCCCTCCGCGCAGACCCCCGCAACATTATCGCATACACTGACGCTTCGCAACTGAACGGAAAAACCGGCGCGGGATATTGCATCACCGACGGCCTACCACGCCGAGTCGAAGAACTCATCCCAATGGGCAATACAACAGAAGTGTTCGACGATGAACTTAGAGTGATACACGACTGCCTCGCGACCTGCCAAAAGACCATCACCCTCAACAAACACACCCGCCGCAAAATCACATATTCACCGACAATCAGGCCGCCATCCTCCGCGCCTCCCCTCCTCCTACGGCCCCGGCCACGGAACTCGCCCTCTCGATCCTTACGGTG…
912	1394	1	2579	2579	+	LINE/Tad1	CCGACATTCCGATGCCTCCCTGCTCCTCCGTTGTCGAGAAGAACCCTCTCCCTCCCAACAAACTGCCCACATGCGACCTCGCTACCAGCAAACATGCTAGCGAAGAGCCGCATGACATGCAGGCACGGGATGCGAATGGCGACACGATTCATGTCGACTTTGATGTCATGGAAAGCGAAAGCAACAACGACACGTCCTTCCCATGTGACAGCTCCCCATCACCCACCCCACACAACAATGCCCCTCCCCCTGTCACCCCCCAACTCCCCAGACTGTTTGACTGCAATGTTGTCGTTGACTTCTCCCCTGACCGCATACTTACAAACACCCCTGGACACACCATCGGCGCCACCAGCGGCATGCAGAAGGAAATACCCAACCTTAAACGCAATGCTACCT…
913	1394	2585	4666	2082	+	LINE/Tad1	GCAGCTCCAGCGATAGCCAGGGACGTGACAAACTGGGCCGTTGATGATGACATCGCCACTGGCTCAGACCACGAGGTCATTTGCTTTCAATTAGACTCCCTCCACCCCGACCTCGACACCACATCCACCACCCCCTGCCTGAACTGGCACACGACAGACTGGGCAGTCTTCACAGACACCCTACAACGGCTGTCCGACACCACCTACCCCTGCTGGACCCATCTCAGAGCCAACCCAACTGCATGACACTTAGACGAATGGGCAATCCTTCTCCAGGATGCCATTCAATCTGCAGCCAAAGCCGCCACACCGGTGTCGGTCCTCACGTCCCACTTGAAGAGATGGTGGACAGCGGAATGGGACCAAACCCGCAAAGCTATGACCAGCACCTGCAGACAC…
914	1395	596	1207	612	+	LINE/Tad1	ATCACTCTCGACTCCACCATCTCCGACACTGCCGCAACCACTGATCAAACCTCCAATCAATCAACAAAGTTATTAATGAATCACAAGATATCACCCAACCCCCATTCATCCTTGCATGAATCACCAGCAACAACCACTTAGTGCTTACCACCAATCCCACCACTGAAGCATCCACCTATGCTCCCCACCTACAGATTATTGCCAACACAACAAAATCACTTAAACTAGTTGAAACCACAATCAACGAATGCTGGACCAAATTCCTCTTGCATAATGTCCCCACCAATGCAGACCTCTCAGCTGTCAAATATGAAATCGAAGCCACATACCCCTCCCTACACCTTGCACAAAACCCCCGCTGGCTAGTCCCCACGAACCACCACCTTAACAAATGTGCAT…
915	1397	492	896	405	C	LINE/Tad1	AGGGGAGCGAGGAGAAGGAAGAACAGAGGGTGCATGGCAGGGGTGTGGGGGAGAGGGGGAGCAGAGAGTGGAAAGTCGAAGAAGGAGCGCAGGAACAGGAAGCATGGTGAGGGGGTGGGGTGGCAGAAGCCTGCAGGCATTTACCTTTTCTTTTGTTCTTGTTTCTGTTTTTGCATTCAGAGGAAATAAAGGTGGAATAATGGATTAAATATGGGAGGGGAAGGGTGGAGGAAATGGGGGAACAACCTGGCGAGGTGGCCTCCGAGCACACAGGGCTCCTGGATCAGAAGATGCTAGATGGACGAAAGCATTATCAGTGTTGGGGGACTACAACCCCATACCCAAAGAAAGCTCTGGGCTTATCCCAGTGGGGACTCGGGGTAACAGCCGGTCCTTACC…
916	1404	422	2978	2557	+	LINE/Tad1	CACTACACAGCAACCACTGACCCCCCCTGCATTTTTTAACAACAACCTCAAATGTCCCCGCTCTGCCAACGGAAATCGCCTTATCGCACACTGTGTACCCCGAATCCCAAATTCCAGGACCGAATTCCTGTTTACCGTTGAGTTTCAGCGGAAAAACGCAATTCCGGGACCTCCACACCGGTGAACGGGCCTTTCCATCAACGCCGCCCCACATCCCGCCCTCCGGTCATCAAACAAACCTTATATTGGGTTTCGGCATACCGAAATCCCCCCCTCCCCAAATTCCCCCATCGCCAGCAGCACTGGTTGTGGTGAACCCCAAAATTTCCCTCCTTTCAGACCCCCCTTTCTTCGCGAAAATTTTTTCTCGCTTAACAAGAGCCTCATCACGTGATCCTT…
917	1404	3020	3540	521	+	LINE/Tad1	ACCATCCGCTGGGTCCCAGGACATACCAACGTCCCCGGGAACGAAGCCACCGACGAAATGGCTCGACAGGCGACCACAGTCCCGCCACTCCGACAACTACCGATATCCCTCACCTGGATACGGCGCCGCACTCGAGAACGGTACACCGAAGACTTGGCTACCTGGTTTACCTCATCCCCTCAGCCACGCACGTACGCCGCTACACACCGCCGCAAGATGAACACAGCCTACACCGACAACCCCCACTGGATATCGACTGCGATCCTGGGTCTTTGCACTGGCCACGGATACTTCCTCAACTGCCTAGCCCACCCTCCCACAGAAGCATACCCCTCCCGGCGATGCAGCTGCCCTATCCATCCGCCACAGACACCTCGACACCTCCTGCTGAGCTGCCCC…
918	1413	1	1187	1187	+	LINE/Tad1	CCCCTAGGCTCAACGAAAAGTGGTACAAACTGGCTGTCCATGGTATCCCAACCGACTTTTTCCCAGAGACTGAGGAAGGCATGACATGCCTGAAGAATGAGATCGAATGCAACCACAATGTCAACCTTATGCAGCTACTGCACTACATGTCACACTCAGAGAAGAGGGCTGGTAAGTCATCATCGAGCGTAATGATATATCTCCGGTCTAGTGATAAATATAACACTCTCAAATGCACGAAAGTTGTCGTGCTCTTNNNNNNNNNNTTTGGCCACCACCACGCTACCTGCACCGCCGATAATGGTCTCATCTGCGCCATCTGTGCCCTTACTCACCCGACCAAATACCACCCATGCGCAGCCTCCCCCTCACTCAAAGGTCAGAAATGCATCCACACGG…
919	1417	442	1075	634	C	LINE/Tad1	AACAACAACCTTATTTTCAGTTTCGGCATACCGAAATCCCCCCCCTCCCAAATTCCCGTATTGCCAGCAGCACTGGTTGTGGTGAACCCCCAAATTTCCCTCCTTTCAGACCCCCTTTCTTCGGGAAAATTTTTTCTCGCTTAACAAGAGACTCACCATGTGATCCTTCGCCCATCGCTTACAGAGTCCCCGATTTCGCGATGGACGCTAATCTGCCCCTCCCGCTAACCCCCTCGCTTATGCAAGTACAGGGTTACACCTGCAGCCCTACCACCCAAGTTCCAGCAACCCCAACCCACCGAATCATAACCATCGACCCCAACTCCGCCATGTCCACCAACGCCCTTGCCCACGCAGACGCCCCTCACGCTGGTACTTCCTCCACCACTGCCCCGTCCC…
920	1421	1	629	629	C	LINE/Tad1	CACCACACAGCAACCGCTGACCCCCCCTGCATTTTTCAACAACAACCTCAAATTTCCCGGCGCTGCCGACGGAAATCGCCTTAGCGCACACTGTTTACCCCGAATCCCGAATTCCAGGACCGAATTCCTGTTTACTGTTGAGTTTCAGCGGAAAAACGCGATTCCGGGACCTCCGGACCGGTGAAGGGGCCTTTCCATCAACGCTGCCCCACATCCCGCCCTCCGGTCATCAAACAAACCTTATTTTCGGTTTCGGCATACCGAAATCCCCCCCCCCCCAAATTCCCCTATCGCCAGCAGCACTGGTTGTGGTGAACCCCCAAATTTCCCTCCTTTTGGACCCCCTTTCTTCGCGAAAATTTTTTCTCGCTTAACAAGAGCCTCATCACGTGATCCTTC…
921	1425	429	1264	836	+	LINE/Tad1	CCCCCTTGCATTTTCAACAACCACACTGAAATCGGAAGATTTTATTGCGGATTACTGTTCGGCAGCCCCGAATTACCTATTCGCAGCATTTCCAGACCAGGCTTACTCTTTTTCGTTGAGTTTTCATCAAAAAAAGAGTTTTCGGGCCCCTGAGAAAAGCCCTGCGAACACGGTTCCATCAACACCGCACCCCACACACATCAAAAATCATCATTTTAATCGCGGATTCCTTGTCGCTGCCGCAAAAATACCTTATCCTGAAACTCCGATGCCTCCCTGATCCTCCGCTGTTGAGAAACAGCCCCTCCCCCCCGACAAAGCACCCCCTCGGGCGCTCGCGACGAAGAAATGCGCTAATGCGGAGCCGCAAGTGCCTGACGCGTCCGACACGGAAATGCA…
922	1428	57	1399	1343	+	LINE/Tad1	AAAATCCGGCTACCTCACAGGATGATGGTAGAACCAGGCACAAGAGGAGAAAACAGCGATGTGGTACAGTGGATAGGGATCTTCTTCAATAGGAAACTTATGTTCAAGCATCATGTAACTACCAGGGTGATGGCAGCTACATGCACATTCAACGCGTTACACAGCCTCGTGTGTCACGAAACAGGTCTGTCTCCCTCCATGACGCAGCTAATTTACCAGGCATGTGTCACCTCTAGGTCCGACTTTGGAGCAGAGATTTGGAGGTGAGGACAAAAGAACCTGGAAACAACCCTACAACTACAACAGAATGCAGCCCTCTGCAGAATCCTAAATGCTTTCCGAAATACCCCCATCACGGCCCTCCACAATGTGGCTGCCCTCCCCCCGATCGCAGTCCGG…
923	1428	1422	2202	781	+	LINE/Tad1	CACCACACAGCAACCGCTGACCCCCCCTGCATTTTTCAACAACAACCTCAAATTTCCCGGTGCTGCCGACGGAAATCGCCTTAGCGCACACTGTTTACCCCGAATCCCGAATTCCAGGCCCGAATTCCTGTTGACCATTGAGTTTCAGCGGAAAAACGCGATTCAGGGACCTCCGGACAGGTGAACGGGCCTTTCCATCAACGCCGCCCCACCTCCCGCCCTCCGGTCATTAAACAAACCTCATTTTCGGTTTCGGCATACTGAAATCCCCCCCCCCCAAATTCCCCTATCGCCAGCAGCACTGGTTGTGGTGAACCCCCAAATTTCCCTCCTTTCGGACCCCCTTTCTTCGCGAAAATTTTTGCTTGCTTAACAAGAGCCTCATCACGTGATCCTTCG…
924	1435	1	1254	1254	+	LINE/Tad1	ATAGCATGTGTACAGCTACTGAACTGTGCAAAAGGTCATGGTATGACAACATCAGCGTTAATTTCCTTTGCATGAAACCCCAATACCATTATCATTCTTTTACAAGAACCTGCAATTGAATATAACAAACTACCCCCAGCCCACCCTGATTTCCACCTACTTACCCCAGTCCAAGAACACCCCCTTTGCACTACCTATATCCGCTGCCTCCCCGGAGTGCAGGCAGACATCACCTTTACCCATTCAAACTCTTTCCTTGGAACACGCATCTCACTCCCTACCTGCCCGGCATTCACCATTTACAATTTTTATTCCCCAGGCAGACCACATGCGATCGCCAACCTCCTTCCACAATTCCACCCTGCTTCCCTATCAATCATCATGGGAGATCTAAAAGCA…
925	1440	821	1021	201	C	LINE/Tad1	CTGGTAGCTCCAGTTTTCCAAGCAGCAACAGCGACTGGCCTGTAAGGTCTCCACCCCCTTTGTCCCCACAAAAGACCTCCCCCTCAAGACCAGACAACTCATCTTCTCTCGCTGGACCAATGCCTGAGCATCCCCCAAACTGGACCAAGAATCCATGGCAGCCATTAACAACTACCTCTACCTGAAGGGAGCCTCCAATTT
926	1441	1887	2447	561	C	LINE/Tad1	AATGAACTCACCAAATGCAACCTTTCAATCCCCTCCCCCCCCCTGAACACCACAAGTCAACCCAAATGCCCTGGACTGGAACCCCCTCTGCCACTGCCCTCTTCCCGAATGCCCCCCTCACCCCACCCAAACACACCCTGAAGACCCCTGGCCCCAAGAAGACCCCCATGCCCAAGAAAACTCCTGCCTGCTCCCAGGACATCGTCATCCGCTGCCCCAACCCCCATGCACTCCTGGACAGCATGAAGACCCAAATTGGACTGGCAGTGAATGCTGCCCTACATAAGGCAAACATTCCCATGAACATCACTATCATGACAGTTCAGAAGAACATCTCCAGTAATCTCCTCCTAACCCCATCCCCCCATACCCCTGTCTCCAACATTCTTACCCATCTCC…
927	1445	3	918	916	+	LINE/Tad1	CGCTCGAAGAGATGGTGGACAGCGGAACTGGACCAAACACGCAAGGCTATGACCAGCGCCCATAGATGCTGGAAACAATCACGCCTCCACACCCACCACACCGAGTACAAATGCCTCTGCAACTCTCACTACCGCAGGATACGACACGCGAAGGATTCACTGTGGAAGGAGTACCTCGCTACAGTGGAAGGAGCAGACATGTGGCCAGCCTTCCGATACACCAACCCACGCTGCGCCCAACTCACCCCGCCCATTAGGACCCCGGTAGGTGGAGAGGAACAAGTATGTGTGGACTTCCCGAGCAAAGTTGCTGCATTCCAGGGGCTCTTCCCCCCCCCCCTCCAACCCCCCCGCCCAAGCCTCCCACCCCAAACCCGAAATCCCATGGCACACCTTCAC…
928	1445	953	1276	324	+	LINE/Tad1	CCCCCGCGGCCTTTTCAACAACCACACCGAAATCGCCTGATTTTATTGCGGATTATTGTTCGGCAACCTCAATTTACCTATCCGCAACTTTTCCAGACCAGGCCCCCTCGTTTTTGTTGAGTTTTCATTGAAAAAGAGGTTTCCGGGCCCCTGAGAAAAGTACCGCAGACTGGACATCAACACCCCACCCCACCACGATCAAAAACCATCAATTTCTTCGCGGAATCTTTGCCGCTCCCGCACAACAAACTTATTCCGAAAATCGGATGCCTCCTCGTGCCTCGGTGGTGGAGAAACCCCCTCCTCCCCCCGAAAAACAACCTC
929	1449	22982	23414	433	+	LINE/Tad1	AGAGATTCAAGACGAAGCGCATCCTAAATTTCCTTGGACCTTGAGGATACGGAGATTGGCAACAGAACGTCAGAGAAGGAAACTGCAGAAAGAGAAGAAGATAGAGATGAAATGTGGTGATGGAATAAAGAAACGGAACCGGAGTCAGAGTTCGAAGAAGAAGAAAGAAGGGATGAGGAACTGATGGGGAACAGACTAGATTTGGAGGATGTGGGTGCGTTCATAGAAAGGGTGTTGAGAGAGGCGAGAGCAGGAGGCGGAGATGAGCATGGATAAAGGAAGCAGAAAATAAGAAAACAAAAAGGAGAAAAGCAGAAGTGTGGAGGTTATGTATGAGTGAGCATAACGCCCTCAAAGCCGGAGGTTAGAGAACTAGCACGAAGGAGACACGAAGAGATT…
930	1454	172	1736	1565	C	LINE/Tad1	CCTTCACATCGACCCCCATAGTGGCCTTACACAACGAAGCGGCCATACCCCCCGTCGCAGTCCGCCTCCAACGCCGCAACCGCAAATATGTTCTCCACCTCCTCTCCCTTCCCCCTTCCCACCCAGTAGTTAGATGCTGCCCTTCTTCCTTCCCCATGCCCAATCACTTCCGCACCTCCATATGTAACCCGTCCGAATATGACCACCCCTGGCACATCACCCAAAGAGCCCCCTCGCACCTCGTTCGTATGCTCCGCTCCATTGGTCAGTCGATATTACCAGATGACGAAACCGAGGACACGGCACATCCAAATCCCACCCTGTGGAAAAAGTCACCCTTAAGAACAAAGATATCCTCCCTCCCCAAACCCGAAGCCGCCATCGAACACCTCTCGCTGA…
931	1455	83958	84384	427	+	LINE/Tad1	CCCTCCCCCCCCTGCATTCTCAACAACCACATGGAAATCCTCGGATTTTCGAGTGGATTCATGATCAGCGCACCCGATTTACCCAGTTGCACCAATCTCAGACCAGGCCTTCTCCTTTCATTGTGTTACATAGTGAAACAGAGATCTCCAGGCCCCTGAGAGAAGCCAGCAATGTGGTCATCAACACCCCCACCCCCAACCACCAAAATCCATCAAAATTGTGGCAGAACTTTTGTTGTGCCACCAAAAACAATACACCCCAAAATTCCCATGCCCCACCACCCGATGGTTGCAGAGAAACTCCCACTCCCCCATAAAAACCCTCCTGTACATGACCTTGCAATCCAACAATGCACTAGCCCAGAGCTGTAGACCCTGCAGCAATGCAATGTGCTAGAC…
932	1456	77283	79514	2232	+	LINE/Tad1	CTGGAATACCACAGCGTTCGCTGGTGTCCCCGATATTATTCGCCATGTACATATCCGGCGTGTTTGAAGAAGTTGAATCGGAAACTGGCGCAAAGGGAATATCCTTCGTAGACCATCTCTCATGGATGGCATCCGGTGACAATGTGTCGCAAATTGCAGATACCCTCTAGAAATGCGCCAGCATTGCCAGAAAATGGGCATCCCAAAACGCAGTTGAATTTGACCTGGAAAAAACGGAAGCAATCTTATTCGTCAAGAAAAACCAAAAACGAAAAAGAAGACGGCGCATAAATATCGGCAACGGGCACATCAATCAGTTCAACAAAGGCTCAACCAGGTAGCTGATTTTTTGGATGGACTCGGCTTTGAATTTTAACGACCATTTCACGAAAGGATGGC…
933	1461	2	1787	1786	C	LINE/Tad1	ACACAGCAACCGCTGACCCGCCCTGCATTTTTCAACAACAACCTCAAATTTCCTGGCGCTGCCAACAGAAATTGCCTTAGCGCACACTGTTTACCCCGAATCCCGAATTCCAGGCCTGAATTCCTGTTTACCATTGAGTTTCAGTGGAAAAACGCGATTCCGGGACCTCCGGACCGGTGAATGGGCCTTTCCATCAACGCCGCCCCACATCCCGCCCTCCGGTCATCAAACAAACCTTATTTTCGGTTTCGGCATACCGAAATCCCCCCCCCCCAAATTCCCCTATCACCAGCAGCACTGGTTGTGGTGAACCCCCAAATTTCCCTCCTTTCGGACCCCCTTTCTTCGCGAAAATATTTTCTCGCTTAACAAGAGCCTCATCACGTGGTCCTTCGCCCA…
934	1461	2407	3163	757	C	LINE/Tad1	CCATGCTCAATTGACACCACTGATTAAGGCACAGGTAGGAGGAATGGAGAAGTTATGCGTCGACTTAGAAAGTAAGGTAGAGGCCTTTCAAGCATTATTCCCGCCCCCCCCCCAGCTACCCCACCCACATGCACCTCATGACCCAACCCCCAACTCCTCTGGAAAACATTCACCCACAAAGAAATTCATACTGCCATCACAACATCCTCCCCCAAGAAAGCCCCCAGCCTGGACTCCATTACATTCACGTGCCTTAGGAACGTGTATGATGCAGTCCCCACAGTCTTCAACGCCCTGTACTGAACCCTGGGAAAGAAAGGATATCACCCGCAGAGCTGGCGAGAGGCCACAATGGTCATGACACCTAAACCAAACAAACCTGACTATAGCACCATGAAG…
935	1463	4106	4321	216	+	LINE/Tad1	TTTCAAGGCAACAAAGACAGGGAAAGAAAAACTGGGATAGGGAAGGGTAAAGGATAGGGCAGAACCCAGCATGGTGGCCTCTGTGTGTACAGGGTACATGGAACAGAAGATGTAAAATAGATTTTGAGCAAGTAGGACATGGGGTTTCAGTCCTGCACAGCATATAACCTATACTAGGACAGAGCCCAGAGGATCCTGAGTGTAATGTTCAGGTTC
936	1463	4397	4895	499	+	LINE/Tad1	TTAAAAACCAGCTGACAAAGACAGAATCAGGAAAATGTTGGTAGTACCAGGAATGAAAGATGCACAGCAGGGAGCAGCTCTTGGAAGAGTGCTCACAATGGAAGAAAGACATAAGGGAGTTATGGAAATGTCTTCGAGAAGGACATTGGCTGGCAGAATGCCAAGTAGATGACAATAGCACAGTTGTTTAGGGAGGAGAAAGTGTGGAAAGCCTTGCTAGAATTCATAAGGAAGATGGGTGTAGGCAGAATGTGTGGTATGAGTAGACCAGAAGGAAATCAGGAGGAGAGCAAAATCCACGAGGAGAGAGAGGGTGAAAACCCAGGCATGTAATACGAGAAGATGAAGGACATTTATAAATGCAGACACAGGGTAAAGAAGGGGTCCACAGTTGATGCC…
937	1464	16	1177	1162	+	LINE/Tad1	GCACCATGAGACAGTTAGGATGTCCTGCGCCGGTGGTGTCATGGTGCAGATCATTCCTCACGGGGCGGTCCATGGCCCTTTCTTTCGACGGCAGAACAGACATACAACAGCCCGTGGCTACAGGTATACCCCAAGGCTCCCCCGCATCACCAATCCTATTCCTGCTGTACCTCCGCCCTTTATTCGACAGTCTCCAGATACACCACCCGAACATATGGAGTCCAAGCTACATCGATGATGTAACGTTGGTTGCCCAAGGCAAGACAAGAGAAGGGAACTCGAGAGCGCTAGAAGCGGTGGCAAGAACCGCTTTCCAATGGGCGCGGGACAACGCAGTAGCGTTCGATGACGCAAAGTCGGAAATGCTACATTTCCACCGTTCCAGACAGGCCGTCGTCA…
938	1466	1	528	528	+	LINE/Tad1	GCATTGTGTCTCATAACACAAATAGAAGCACGAACGCCCTGAACACCCTGCTTAACACAGCAGGTAAAGACACAGACATCATATTTGTGCCGGAAGCCAATATAAAATACACTCATTTCGCTACTACCCACCCCAATTTTCTTTTGTTGATTCCCCCACGAGGCAACCACCCCGTCAACAGGACGGCTGCTTATATATCCTGCCTCAACCCCCATCTCCATGTTACCCCCCGCCCGGACATTTGCGATGACCCGGACCTCCAAGTCCTGGAAGTTCAGACTGACCTCATCCCCACCTTCTACCTTCTCAACATATATAATGAATATGATCGCCACACAAACCTCTATACTATCCCTCAAGCCCTCACCCCCCTCCGCCTCCCAGAAAAGTGCATCATCA…
939	1466	540	1178	639	+	LINE/Tad1	GCCGAATACCCCAACGACACCACCATGACCACCGATGCATAGAAACACAGCATCAGCGGCAACCCTTTGCATTGTGTCTCATAACACAAATAGAAGCACGAACGCCCTGAACACCCTGCTTAACACAGCAGGTAAAGACACAGACATCATATTGGTGCAGGAAGCCAATATAAAAGACACTCATTTCGCTACTACCCACCCCGATTTTCTTTTGTTGATTCCCCCATGAGGCAACCACCCCATCAACAGGACGGCTGCTTATATATCCCGCCTCAACCCCCATCTCCATGTTACCCCCTGCCCAGACATTTGCGACAACCCAGACCTCCAAGTCCTGGAAGTTCAGACTGACCTCATCCCCACCTTCTACCTTCTCAACATATATAACGAATATGATCG…
940	1466	1179	2377	1199	+	LINE/Tad1	CCTGGCGTCACCCTTGATGGCGAGAGAGGTAACAAATTGGGCTGTGGACGACGAAAATGCCACGGGATCCGACCATGAAGTCGTCCGGTTCCAAATAATATCACTACACCCCGACATCGACTTCGCTGACCCCCAACCCAGACTAAATTGGCACAAAACAGACTGGTCGAAGTTCAGCAATGCCCTCCGCACCCTGTCCGAAGGCTTGACAACCCGCTGGTCAACCCTACAGCAACTCCCAACCCCGGAACACCTCGACGAGTGGGCAGCCATGTTGAGGGACACAATCAAGGTGGCAGCGGAAACATCCACAACCCCACTCATACAGGCCCCACGCTCCAAACGATGGTGGATCCCAGAGCTGGAAGACTCACGCCGAAGAATGACCAGCGCACAATG…
941	1468	1	1498	1498	C	LINE/Tad1	GCCTGGTTCTTGCACAAGATGCGGCAAGCAAAAATGGATGAGAACCTGATCCAGTGGACCGGGAGCTTCATGTCAAACCGCAGAGTCGAAATAACGGTCAATGGGGACCCGGGACTCGCCATTGATACCAACACCGGCCTGCCCCAGGGCTCACCGGTGTCACCGGTACTCTTCCTCCTCTACATCGCCGACCTAGCAACCCTAGTGGAGTCAACGGTCCCCGGGGCGGTGGCCCTGTCCTTCGTCGATGACGTGACCTGGATCGTCGAAGGCGCCGACGACGCGGAGGTAACCGTGAAGTTGAACAAGTGCGCGGCCACATGTCTGACGTGGGCCCAGGACAATGCGGTCCGCTTCGAGGAGGACAAAACCGAAGCGATCCTCTTCTCTCGGCGCCGC…
942	1468	65063	65727	665	C	LINE/Tad1	GCATAAATACAATCGACGATGACGGTGTTGGTGGTGCGAATCTGGAGAGAAACAAACTGTTAAACACTTAATGAAAGAATACTGTCGATGGAGAGAAGCCCGTGAAAATCTGAAGAAACACGTCAAACGACACCTACAGCAACACTGTGATCTACAGCACCTCTTCGCAAACAAGGACGCTTCCAAGCCTTTATTGAAGTACCTGGAAGCCACTGATATCGGGAATAAAACCGCCGAAAAAGAGATGGAACAGGCAGAAGAAGAAAGGGACGAGGTATGGGGATGGAACGTATTAGAAGAGGAACCCGATCAGAGAGCAGGAGACGTGGATAGAGAGGGAATGGCAAACAGAATGAGAGAGGTGGCGAGGTTTATTGTGGGAGTTGTAGCAGAAGTAGA…
943	1472	2	646	645	C	LINE/Tad1	CCCCCTGCATTTTCAACAACCACGCTGAAATCGGAAGATTTTATTGCGGATTACTGTTCGGCAGCCCCGAATTACCTATTCACAGCATTTCCAGACCAGGCTTACTCATTTTCGTTGAGTTTTCATCGAAAAAGAGTTTTCGGGCCCCTGAGAAAAGCCCCGCGAACACAGTTCCATCAACACCGCACCCCACACACATCAAAAATCATCATTTTAATCGCGGATTCCTTGTCGCTACCGCAAAAATACCTTATCCCGAAACTCCGATGCCTCCCCGATCCTCCGCTCTTGAGAAACAGCCCCTCCCCCCGACAAAGCACCCCCTCGGGCGCTCGCGACGAAGAAACGCGCTAACGCGGAGCCACAAGCGCCTGACGTGTCCGACGCGGAAATGCACGT…
944	1472	668	1401	734	C	LINE/Tad1	TGGTGGAACCAACAAAAAGACCTCGCCCGCACCCTCCAAAAACATCAGAACACCGCCCTCCATAGGATCCTCAATGCCTTTACCTCCACACCAGTCTTGGCGCTCCACAATGAATCTGCAATCCCACCCGTCACAGTGCGCCTCGACAACTGCCAGCGGAAATACGCACTGCGCACCCTCACTTTACCCGCTTCGCACCCGATTATCACATGCTGCCCCATCTCGTTCCCCGCACCAGGTGTCGAAGATGCCTCCATCAACTCGGACACTGAGTATGACCACCCATGGCAAACAAGGAAACGCCCCGTCCCGCCTCCTCCACGTCATTAACACACTCTCCCCGTGGGTCCGACCCAATGCCGAGATCGAGGACACCTCCCAAAACATCCCCAACCATGC…
945	1474	8018	9058	1041	+	LINE/Tad1	GGAAGGTACCAAGAAGTTCACAGCACAGAACTCCCAGCCATTACATGAGCAGCATGCTGCTCTATAACCCAAGATAAAGAGAATCAACACTATACCATGTTTACTGACTGCAAATCAGCCATTGAATGATGCAGAAATGATACCCTCAGCCCAGGACAAGCACTGGCAAAAATGATCATTGACAGAAGCCTGGTGTTAGCCAGCAACAGATGTGGAGTGACACTGAGGTGGGTGCTAGAACACCAGGGAATAGAACGAAATGAGGTCATGGATTGCTTGGCCAAGAAGGCAGGACAGGGAGATGGAGCAGGAATGAGAATGGAGGGAGCAGAAGCAAGTCTGGCACCTCATAAGAACAACCAAGGATGAAAAGAAAAGAAAAATGAAGGAGTGGATAAA…
946	1476	809	3447	2639	+	LINE/Tad1	TCATCACACAAATCACAAACAACAACCGTCTAGTGCTTACCACCAACCCCACCACCAAAGCATCCGCATATGCTCCCTACTTACAGATTATTGCCAATGCAACAAAATCTCTCAAACCAATCGAAACCAGAATCAATGAATGCTGGACCAAATTCCTACTGCATAATGTCCCTACCAATGCCAACCTCTCTGCCATCAAATATGAAATCGAAGCCACCTACCCCTCCCTACACCTTGCACAAAACCCCCACTGGCTTGTCCCCACAGACTGCCGCCTTAACAAATTGGCATCCACACTTGTGGTTTCCCTTATCGGAGCCATTGACTACAAATGCCTTGGAACCTCTTCATTGGCCATCTGTAATCGACTCTGCCACATTAACGAATACTTTTCCTCAA…
947	1477	197	1062	866	+	LINE/Tad1	CACCACACAGCAACCGCTGACCCCCCCTGCATTTTTCAACAACAACCTCAAATTTCCCGGTGCTGCCGACGGAAATCGCCTTAGCGCACACTGTTTACCCCGAATCCCGAATTCCAGGCCCGAATTCCTGTTTACCGTTGAGTTTCAGCAGAAAAACGCGATTCCGGGACCTCCGGACCGGTGAACGGGCCTTTCCAACCACGCCGCCCCACATCCCGCCCTCCGGTCATCAAACAAACCTTATTTTCGGTTTCGGCATACCGAAATCCCCCCCCCCAAATTCCCCTATCGCCAGCAGCACTGGTTGTGGTGAACCCCCAAATTTCCCTCCTTTCGGACCCCCTGTCTTCGCGAAAATTTTTTCTCGCTTAACAAGAGCCTCATCACGTGATCCTTCGC…
948	1479	4708	4966	259	+	LINE/Tad1	CACGGCTCGAAACTGATATGGGCCCAATTCTCTACGCAATCTACATCTCAGAGTATTCGACGAGGTTGAAAGCAAGTCTAAAGGGAGATCAATATCATTTGTTGATGATATATCCTGGTTGATCATTGGAAATATACGTCACCAAAATAACACAAAAGCTCTGAAAGTGCGCGATCATCTCCAAGCGACGGGCTGCTCGAGATGCCGGTGAATTCCATGTACCCCAGACGGAATGAATTCTCTTCGCAAATGGAATGAA
949	1481	5641	6007	367	+	LINE/Tad1	ACTGGGTATGGGTACTGCCTAGACTGCCTCATGTACCATCCCTCAGACAAATACCCATCCCAGAACTACAGCTGCCCCTTGCACCTGCCTCAGACACCAAGGCACTTGCTACTCTGCTGTCCTGAATTCTGATCCCAAAGAACAGAACTTTGACAGGACCTCAAACTCCACCAGAACACATGCCTTAACCTGGAAACCATTCTACATACCCCCTCAGGAACCAAGGCCTTATCCACTTTCATCTCTGCTACCAACATCAAAACTGCCAAATGGGCAAACACCAAGCTAAGTAAAGTCCTCACTGAGGAGGACACTCCCACTTTACTAACAACATGCTGGGGAACTTTGCTGGAAGACAGAGAAGAAC
950	1481	6116	6375	260	+	LINE/Tad1	GGAGAGAGGGGCAAAGAGCAAAGCAGGGCAGTGTGGACATTTAATTGGGAGGAAATAAAAAAAAAAAAAAGAAGAAGGGGGTTGGGGAAGTGTAGAGGATAGGGAGAAGCCCAGCATAGTGACCTCTGTGCACACAGGGCACATGGAACAGAAGATGCGAGATGGATTTTGAGCAAGGAGAAGATGGGGTTGCAGGCCCCACACCATATAACCTGTACTGGGATAGAGCCCAGAGGAACCTGAGTGTAATGTTCAGGTTC
951	1483	51	494	444	C	LINE/Tad1	CGGACTCAACAGCAACCTTAAAACGCCTAAAAGACCCAACCCCTTCTCCCGGCCAATGGCTAATCAAAAAGATTGCGGAGACGGAAACAATGATTGAGGATCTGGGGCACAGAGTCGAATACCATTGGATCCCCGGCCACATGGATATAAAAGGAAACGAAATAGCCGACAAAGCTGCCAAAGAGGCAGCTGCACACCCGATTACGCAACCTACGAGAAGAATACCCCTCCAAGAGCAATTCACCACAATCTCCCACCTGAATCGATACGCCAAGGAAAAGCGGACCGAAGAACGGAGACAATGGCTACAAAAAAACAATGGTCCCCCGACTAGGTTACTGCTTGCTAACAGAAACGAAACCGGATCCCACCGCCATAAAGACCACAAAGAGAATAGCC…
952	1483	103788	104609	822	+	LINE/Tad1	TGAGGTGGGTGCCAGCGCACCAGGGAATAGAAGAAAATGAAGTCGCGGATTGCTGGGCCAAGGAGGCGGCACGGGGAGATGGAGAAGGAACGAGAACGGAGGGGGCGGAAGCAAGTCTGGCGTTCCTGAAAAGAACAACCAAGGAGGAAAAGAAAAGAAAAACGAAGGAGTGGATAAAGGAAAAGATCAAGGGGAGCAGAGCGTATATCCTGAAAGAAAAGGAAGGAATTAGAAAACACCTGAGGAGTGAAAGGAAAGAAACAGCCGCCAGGTACTATCAACTCATGACCGGGCACGCGATCATAGCGCCGTATCTTAAGAACAAGCTAAAAAAGAGAGATTCAGAGGAATGCTGGTGGTGTCAGTCAGGAAAGAAGCAGAGCAGGGAGCACCTCTTTA…
953	1486	1	1653	1653	C	LINE/Tad1	ATCACACAGCAACCGCTGACCCCCCCTGCATTTTTTAACAACAATCTCCAATTTCCCTGCTCTGCCGACGGACATCGCCTTATCGCACACTGTTTACCCCGAATCCCGAATTCCGGGACCGAATTCCTGTTGACCATTGAGTTTCAGCGGAAAAACGCGATTCCGGGACCTCCAGACCGGTCAACGGGCCTTTCCATCAATGCTGCCCCACCTCCCGCCCTCCGGTCATCAAACAAACCTTATTTTCGGTTTCGGCATACCGAAATCCCCGCCTCCCCAAATTCCCCTATCGCCAGCAGCACTGGTTGTGTTGAACCCCAAAATTTCCCTCCTTTCGGACCCCCCGTTCTTCGCGAAAATTTTCTTTTCTCGCTTAACAAGAGCCGCATCACGTGATCC…
954	1493	45	1480	1436	C	LINE/Tad1	TATCACTCGACTACCCCCCCCCCCCTGCGTTCTCAGCAACCACCCGGTAATCGCCAGATTTTCGAGCAGATTATTGTTCAGCGCCCCCAATTTACCTTTCCGCAGCTCCTCCAGACCAGGCCCTCTCTTTTTCGTCGTGTTATACGGTGGAAAAGAGATTTCTGGGCCCCTGAGAAAGCCCCGCGTACAGGTCATCAACACCACACTCCACAGCAACCAAAAACCATCAATATTCCAGCGGAATCTTCGCCGGGCCCGCACAAAGAACCTATCCCGAAATTCCGATGCCTCCCCGCACCCCCGTTGTGGAGAAACCTCCTCTCCCCCCCGNNNNNNNNNNAAAGAACCTATCCCGAAATTCCGATGCCTCCCCGCGCCCCTGTTGTGGAGAAACCTCCT…
955	1493	1547	2245	699	C	LINE/Tad1	CCCATATGCCTGGACTCCTAGTTACATTGACGATGTAGAGATCGTGGTCCAGGGACGCCCCCGCAAAGCAAACGCCCGCACACTCGAGAAAATCACAAATACAGCCTTTCGGTGGGCCGATGCAAACGCCGTTGCCTTTGACGATGCGAAGTCAGAGCTCCTGCATTTCCACTGGGCACGCACCGATAGCAACCCTGAGGAGGAAAAAGCTAAGTTACCAAATAGTACAGTTATCACACCAATAACACAGGGAGGAGAGAAAAATGTCGTGAGGTGGATAGGCCTGTATTTAGATAGGAAGCTTAACTTTAGAAAACATGTAGTTAGACGAGCAACTGCGGTGCAAAGAACTCTGAATGCACTGTGTAGGTTGGCATGGTACGAAACAGGACTGTCCCC…
956	1494	129	528	400	+	LINE/Tad1	AAGAGACACAGGGGACGAGGGGAAGAAGGAGAGGGAGTCATGGAGGTGAGGGACGAAGGGAGAAGTACAGGAGTAGAAGGAGTAGCGGAGAAGTGAGAGAGGAGAGGCGGGGGGGCGGTGCGCCGGCGGGGTTATCTTTTTCTTTTCCTTTCTGTTATGTCTTGGTTTGTGGTGGAAATAAAGGCGGGAAAATGGCTAAAACTGGTCGGGGAAGGGTGGAGGATAGGGGGGAACAACCTGGCGTGGTGGCCGCTGTGCGCACAGGGCTCCTGGAACTGACGACGCGAGATGGATTAAGACCCAACAAGAGGGGAGACTACACTGCCAAACCCTCATAACAGCTCTGGGGCTTACCCAGTGGGGACCTGGCGTCATGCCCAGGTCCTTAACATTGTATTTA
957	1494	594	3524	2931	+	LINE/Tad1	CCGACTACAGTGCACTGAAGGCTTACCGCCCGTTTGCCCCACTGAACTGCCTGGGTAAGATACTCGACAAACTTATGGCAATGCATCTAGGACAGATGGCAGAGGCCCATGATCTTCTACACACCGACCAGATTGGAGGCAGGCCCCAGCGATTGGCTATAGATGCAGCAATGGCACTAACCCACGACATCGAAGTCAACACCCAAGGAAAACTAGTGATGTCAGCTCTCTTCCTTGATGTACGGGGGGGCCTTCGACAATGTGTCTTCCGAACGCCTACTATATACAATGCACCAACTGGGATGCCCGGAGCCCATGCTGACGTGGGGAGCATCCTTCCTCTCCAACCGAACTACAGCACTGTCTTTCAATGGCTGCACTGATGAACAATGCCCCATC…
958	1496	126591	127979	1389	C	LINE/Tad1	TCACAGACAGACACGATATGTGCAGAGAACATCATGGCAACCAACGGGAACCCGAGGCACCAAAGAGATACTCCTGCAAATGCAGAATTCAGCACTATCGAGAAGATTAAAAGAAATGACCCTCCTACAATACAACAACATGGAAAAGTCATACCTGGAAACTGGCAAAGCATTCGAAGGAGACATCATGCCAGACTCGGAGGAGATAATAGCGAAGAGAGTGGCAGAAGAATGGCCCCACAGGATAAATACAGTATCGACCGACGGATCACGACTGGACGATGGGAAAGTCGGTGGCTGTGTAGCCTGGAGTGATAGCAGTGGAGAGTGGATAGGTGAGAAGATGCACCAGGGAACGAATAAAGAGGTGTGTGATGCAGAAATACATGCCATCGAAAG…
959	1496	129336	130728	1393	+	LINE/Tad1	TCACAGGCAATTACGCTATGTGCAGAGAATCCTACAGCAACCAGAAGAGACCCGGGGAGCGAAGGAGACATTACTGGAGACAAAGAACTCAGCACTGTCCAAGAGATTGAGAGGAATGACCCTCCTGGATAACAACAAGATCGAAAAGACCTACCTGGCAAGGGGAAATATGTTCGTGGGAAAGATAATGCCCGACAGGGAGGAGGAGGAAGCCAGGAGAATCGCTATGGAATGGAATGACTGGCAGGACACTGCGTGGATGGATGGCTCCTGCCTAGATGATGGGAGGTAGGATGCAGTGTGGTATGGCAAGAAAACAATGGGGAATGGACAGGCCAAGAAACCCACCTGGGAATGAAGAAAGAGGTGTATGATGCAGAGCTGTGTGCTATAGAGCAA…
960	1497	73	2837	2765	+	LINE/Tad1	CCCCCCTGCCTTTTCAACAACCATGCCGAAATTGGAATATTTTATCGCGGATTACTGTTCGGCAGCCCCGAATTACCTATTCGCAGCATTTCCAGACCAGGCTTTCTCTTTTACATTGAGTTTTCAATGAAAAAGTGTTTTCGGGACCCTGAGAAAAGCCCCGCAAACCCAGTTCCATCAATACTGCACCCCACACACATCAAAAATCATCATTGTAATCGCGGATTCCTTGTTGCTACCGCAAAAATTCCTTATTCCGAAACTCCGATGCCTCCCTGATCCTCCGCTGTTGAGAAACGGCCCATCCCCCCCAACAAAGAACCCCCTTGGGTGCTGGTGACGAAGAAATGCACTAACGTGGAGCCACAAAGGCCCAATGCGTGTGACGCAGAAATGCAC…
961	1497	2838	6263	3426	+	LINE/Tad1	CCTGGCTTCCCCATCGATGCCAAGGGAAATAACAAACTGGGCCATCGATGATGGAATAGCCACAGGTTCAGACCATGAGGTCATCCAGTTTCAACTAAACTCTCTACATCCAGACCACATGGCAGCCCCCCTCGCAACTACTCATCTAAACTGGAACAAAACAGACTGGGATACATTTACCAAGGAGCTCCAGCTCTTTGCGGAGGCCAGCCACCCATACTGGACACACCTCCATGCCAACCCCTCCGCAAGCAACCTCGACGAGTGGGCAGCCCTACTCCGCGACTCCATACAGAGTGCAGCATCCAAGGCCACCCCGACCCTATCACCCACCCTGCACTCGAAACGGTGGTGAACTAATGAAATGCGCCACACCCGCCATGAAATGACCACCACGAG…
962	1497	6644	7025	382	+	LINE/Tad1	GATGAGGAGAAAAGGGGAGTCATGAAGGTGAGGGACATAGGGAGAAGTGCAGGAGTAGAAGGAGTAGCAGAGAAGGGAGTGAGGAGAGACAGGGGGGTGATGGCCCGGCGGAGTCATCTTTTTCTTGTCTTTTCTGTTATGTTTTGGTTTGTGGAGGACATAAAGGCGGGAAAATGGATAAAAATGGCCGGGGAAGGGTGGAGGATAGAGGGGAATGACCTGGCGTGGTGGCCCCTGAGCGTACAGGGCTCCTGGAACTGACGACGTGAGATGGATTAAGTCCCAACAAGATGGGAGACTATACTGCCAAACCCTCATAACAGCTCTGGGGCTTACCCACTGGGGACCTGGCATTCCACCCAGGTCCTTAACATTGTATTTA
963	1497	7126	8091	966	C	LINE/Tad1	CCTACCCTGACGACAATCCGCCGCAATCCTCGGCCTCCAAACTGGGCATGGATACTTCCTGGACTGCCTTGCCCTTCCCCCCACAGACAACTACCCCTCCTGATATTGCCCATGCCCAATGCACCCACCCCAAACCCCCAAGTACCTTCTGCTATCCTGCCCGATTTACAATGCAGCACGGAACGAATTGAGAAGCAAACTGAAAATCCACTGTAACCAATGCCTTATCCTACACAACATTCTACACACCACCAATGGAGTCAAAGCCCTTGCCGACATGATCTCAGCAACGAAAATCACGACACCAGAATCGGCACATACAACATTAAGTAAGTACACCGCGGAGAGGGACACCCCCAGCTGGCTAATCACAGGCTGGGGCATGCTGCTGGACCAGAC…
964	1499	7	3153	3147	+	LINE/Tad1	CTCATCTAAACTGGAACAAAACGGACTGGGATACTTTTACCAAGGAGCTGCAGCTCCTCGCGGAGGCCAGCCAGCCATACTGGACACACCTCTGTGCCAACCCCTCCGCAAGCAACCTTGACGAGTGGGCTGCCCTACTCCGCGACTCCATACAGAGTGCAGCATCCAAGGCCACCCAGACCATATCACCCACCCCACGCTCGAAATGGTGGTGGAATAAGGAAATCCGCCACACCCGTCGTGAAATGACCACTGCCAGGTGCCAATGGAAGCTCTCCGGACTCCCCACCCACAACGATGAATACAAGCGCCTCCGCAACAAACACTACTGGACAGTGCGCTACGCCAAAGACTCGCTATGGAAGGAGTACCTCGTGGCAGTGGAAGGCCCGGACGTCT…
965	1501	332	1918	1587	+	LINE/Tad1	CACATCGCCACCGATTCCACTCCTGTTCCATCCGGAGTCAAACGCATCCACTGCATTGCTGACACCTCCCCCATCGACTATTCCCCCTTGACCTACGAGCAACTATCCAACAACGTCAACACCGCCACAGATATGTTCAGACATCCTGACAGAGCCACAAACGACAGAATCTCCCAGGCATTCCGCTCTATCAACAAATACCAATCCACAATTCGTGCCATTCATGATCTTCTGTCCCGTATTGCCCCTGTCATACTCCCCAACGAAGACATTTCAGCCCTCCTTTCCCCCATCGAATCCTCCACCCCGAGAACCCCGCTACCCCCGGTCTACGTCCCCCCGAATCCAACGACCTCCCTTCTATTCATGCACCCTCCCCTGCTGCCCCCTCCCCCAAGG…
[truncated: 6,105 more rows]

## Sheet: simple_repeats
Table S4. Repeats in the Pyronema confluens genome.
[truncated: 10,628 more rows]

## Sheet: low_complexity
Table S4. Repeats in the Pyronema confluens genome.
[truncated: 1,873 more rows]
