# Supplementary material for: The Genome and Development-Dependent Transcriptomes of Pyronema confluens: A Window into Fungal Evolution
Source: PLoS Genet. 2013 Sep 19;9(9):e1003820. doi: 10.1371/journal.pgen.1003820 (PMC3778014; doi:10.1371/journal.pgen.1003820)
Supplement: Table S5 — P. confluens homologs of chromatin-associated proteins and proteins involved in genome defense. A. Histones and histone modification. B. DNA methylation machinery. C. RNA interference and meiotic silencing. (PDF) [file pgen.1003820.s021.pdf]

**Table S5. *P. confluens* homologs of chromatin-associated proteins and proteins involved in genome defense.**

**A. Histones and histone modification.** *P. confluens* encodes a typical eukaryotic set of histones with one gene each for histones H1, H2AZ, H2A, H2B, H3, and H4-1, and a separate H4-2. H3/H4-1 and H2A/H2B occur in divergently transcribed clusters. In addition, there is another H4 homolog (H4?) that is not part of the usual histone gene set, but also occurs in other filamentous fungi, e.g. in *N. crassa* (Microbiol. Mol. Biol. Rev., 2004, 68: 1-108). Whether this gene has a specific function in fungi remains to be elucidated.

The histone modification machinery is similar to that in other filamentous fungi (data not shown). Interestingly, *P. confluens* encodes the catalytic subunit (PCON\_07755) of the PRC2 complex responsible for H3K27 trimethylation and gene silencing in *N. crassa* (Proc. Natl. Acad. Sci. USA, 2013, in press); and different from *T. melanosporum*, where the gene for the catalytic subunit is missing. This might have led to less gene silencing in *T. melanosporum*, and could be an explanation for the transposon invasion in this species.

| locus tag  | description/putative function | acc. closest homolog* |
|------------|-------------------------------|-----------------------|
| PCON_05919 | Histone H1                    | Q9UV33                |
| PCON_13456 | Histone H2A.Z                 | A1C5F1                |
| PCON_05921 | Histone H2A                   | Q875B8                |
| PCON_05922 | Histone H2B                   | Q0CBD1                |
| PCON_13209 | Histone H3                    | P23753                |
| PCON_13210 | Histone H4-1                  | P23750                |
| PCON_05222 | Histone H4-2                  | P23750                |
| PCON_07103 | Histone H4?                   | P23751                |
| PCON_10853 | CenH3                         | Q9Y812                |

\*Swissprot or nr (GenBank)

**B. DNA methylation machinery.** *P. confluens* has four putative DNA methyltransferases, two of which are homologous to DIM2 (de novo cytosine methylation), one to RID (involved in RIP [repeat induced point mutation] in *N. crassa*, Proc. Natl. Acad. Sci. USA, 2002, 99:8802-8807), and one is an unusual fusion of a DNA methyltransferase domain with an Rad8/Rad5 DNA repair protein domain. Most ascomycetes harbor only one DIM2-type protein; however, two DIM2 proteins have, for example, been found in *Coprinopsis cinerea*.

| locus tag  | description/putative function                     | acc. closest homolog* |
|------------|---------------------------------------------------|-----------------------|
| PCON_01959 | cytosine DNA methyltransferase DIM2-1             | Q24K09                |
| PCON_02009 | cytosine DNA methyltransferase DIM2-2             | Q24K09                |
| PCON_06255 | cytosine DNA methyltransferase RID                | P52311                |
| PCON_08358 | DNA methylase domain fused with Rad8/Rad5 homolog | Q6C2R8                |

\*Swissprot or nr (GenBank)

**C. RNA interference and meiotic silencing.** The complement of putative RNA interference genes in *P. confluens* is similar to other fungi, with a slight expansion in some gene families. For example, there are four Argonaut proteins instead of the more usual two that are present in *N. crassa* and also in *T. melanosporum*.

| locus tag  | description/putative function                                                                                      | evaluate* |
|------------|--------------------------------------------------------------------------------------------------------------------|-----------|
| PCON_01366 | RNA-dependent RNA polymerase (similar to QDE-1)                                                                    | 2e-75     |
| PCON_13920 | RNA-dependent RNA polymerase (similar to QDE-1)                                                                    | 4e-48     |
| PCON_05873 | RNA-dependent RNA polymerase (similar to QDE-1)                                                                    | 3e-12     |
| PCON_09961 | Argonaut (similar to QDE-2, best match in <i>T. melanosporum</i> acc. no. CAZ85927)                                | 3e-96     |
| PCON_04155 | Argonaut (similar to QDE-2, best match in <i>T. melanosporum</i> acc. no. CAZ85927)                                | 3e-93     |
| PCON_11553 | Argonaut (similar to QDE-2, best match in <i>T. melanosporum</i> acc. no. CAZ85927)                                | 1e-76     |
| PCON_02188 | Argonaut (similar to SMS-2, involved in meiotic silencing, best match in <i>T. melanosporum</i> acc. no. CAZ83738) | 7e-54     |
| PCON_01517 | Dicer                                                                                                              | 9e-121    |
| PCON_03869 | Dicer                                                                                                              | 3e-31     |
| PCON_01652 | RecQ helicase (similar to QDE-3)                                                                                   | 2e-153    |

\*in BLAST searches with the corresponding *N. crassa* genes
